# Supplementary material for: Bacteria-host transcriptional response during endothelial invasion by Staphylococcus aureus
Source: PubMed Central journal article supplement (PMC7966777; doi:10.1038/s41598-021-84050-x), 2021-03-16
Supplement: 41598_2021_84050_MOESM1_ESM.pdf [file 41598_2021_84050_MOESM1_ESM.pdf]

## Supplementary Information

**Title:** Bacteria-host transcriptional response during endothelial invasion by *Staphylococcus aureus*

**Authors:** Rasmus Birkholm Grønnemose<sup>1</sup>, Christian Garde<sup>2</sup>, Claes Søndergaard Wassmann<sup>3</sup>, Janne Kudsk Klitgaard<sup>1,3</sup>, Ronni Nielsen<sup>4</sup>, Susanne Mandrup<sup>4</sup>, Andreas Holm Mattsson<sup>2</sup>, Thomas Emil Andersen<sup>1\*</sup>

**Affiliations:**

<sup>1</sup>Research unit of Clinical Microbiology, University of Southern Denmark and Odense University Hospital, Odense, Denmark

<sup>2</sup>Evaxion Biotech A/S, Copenhagen, Denmark

<sup>3</sup>Research unit of Molecular Microbiology, Department of Biochemistry and Molecular Biology, University of Southern Denmark, Odense, Denmark

<sup>4</sup>Functional Genomics and Metabolism Research Unit, Department of Biochemistry and Molecular Biology, University of Southern Denmark, Odense, Denmark

**Correspondence:**

Thomas Emil Andersen, Research unit of Clinical Microbiology, University of Southern Denmark and Odense University Hospital, J.B. Winsløvs Vej 21.2, 5000 Odense, Denmark. E-mail: [thandersen@health.sdu.dk](mailto:thandersen@health.sdu.dk)

# Supplementary Information

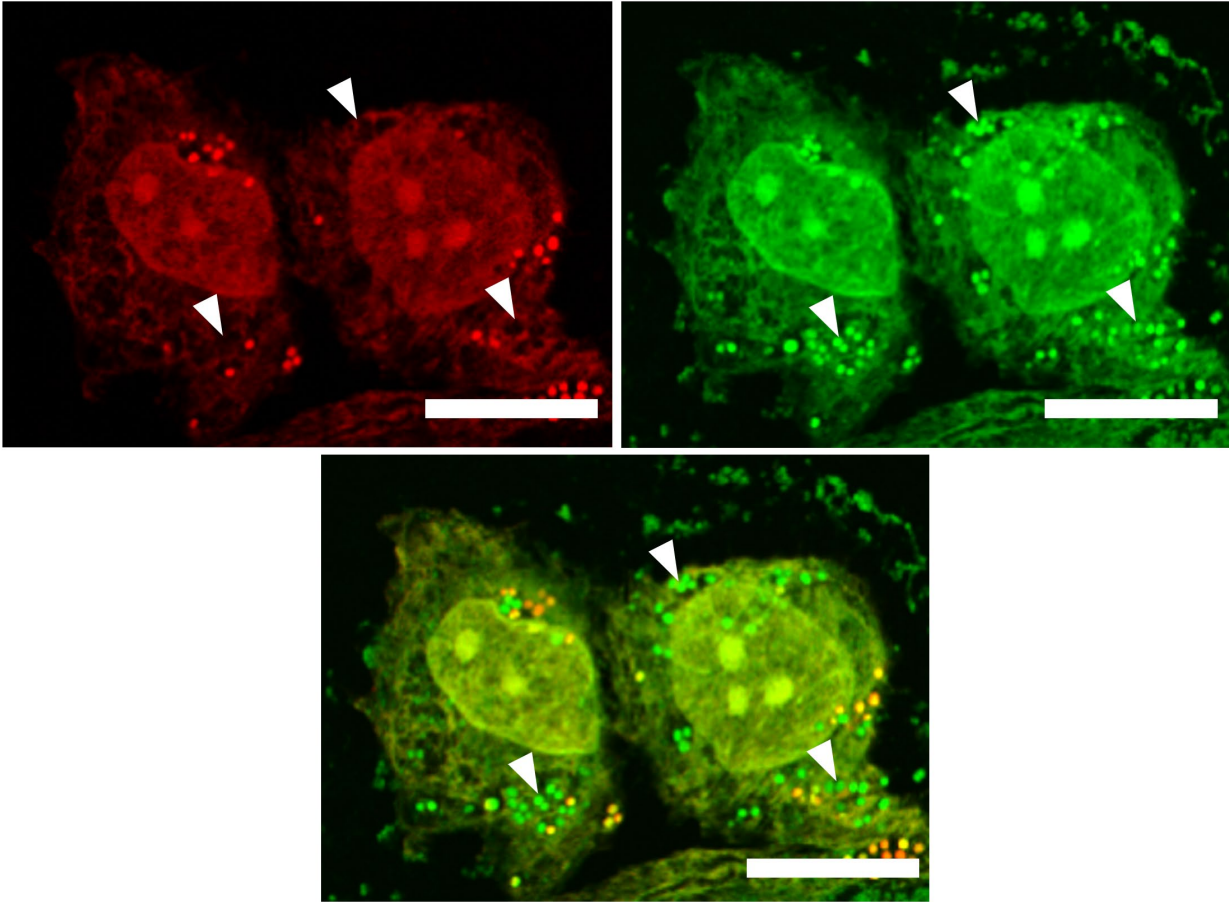

**Supplementary Figure S1:** Infected HUVECs were visualized by confocal laser scanning microscopy. At 1 hpi, bacteria are localised inside vacuolar compartments (indicated by arrows). Cells were stained with LIVE/DEAD cell viability stain (propidium iodide, red, and SYTO9, green). Scale bars indicate 20  $\mu$ m. Samples from 16 hpi can be found in Figure 2C.

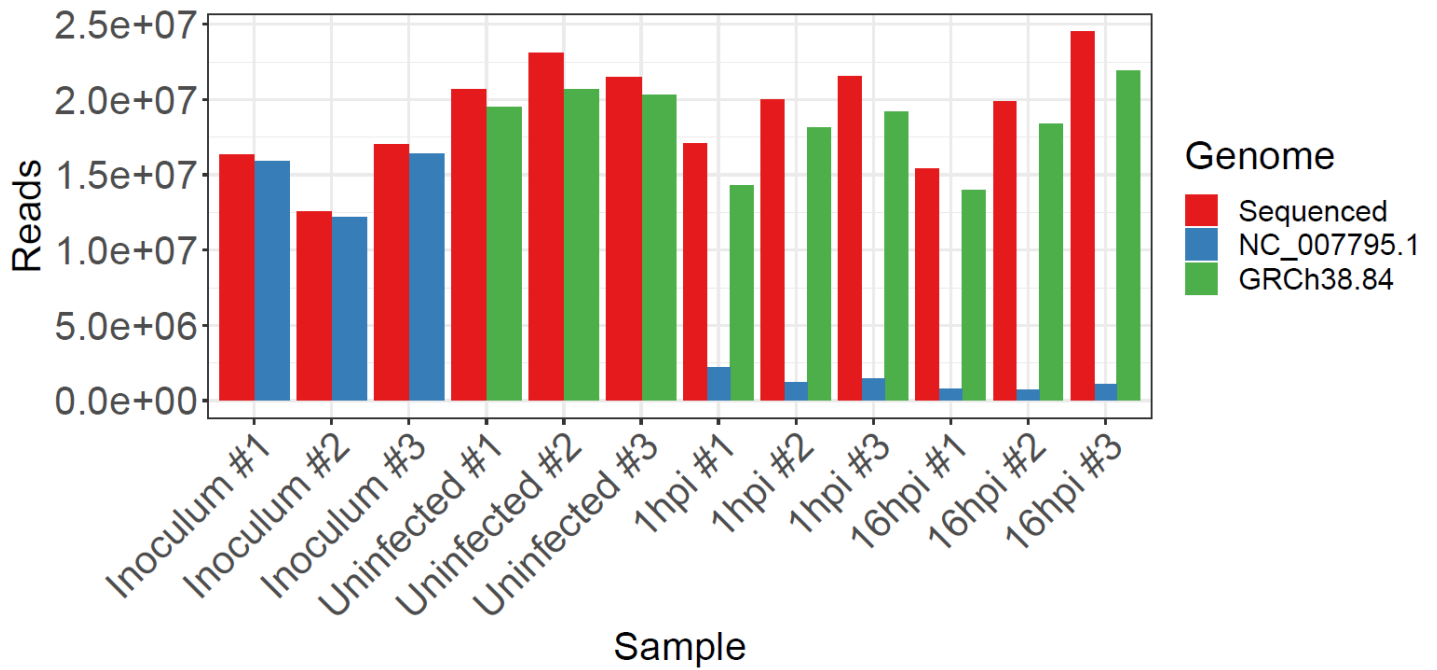

**Supplementary Figure S2:** Total coverage depth mapped to the triplicates of the bacterial inoculum, the uninfected HUVECs, 1 hpi, and 16 hpi. The reads were mapped to either the bacterial genome (NC\_007795.1, in blue) or the human genome (GRCh38.84, in green).

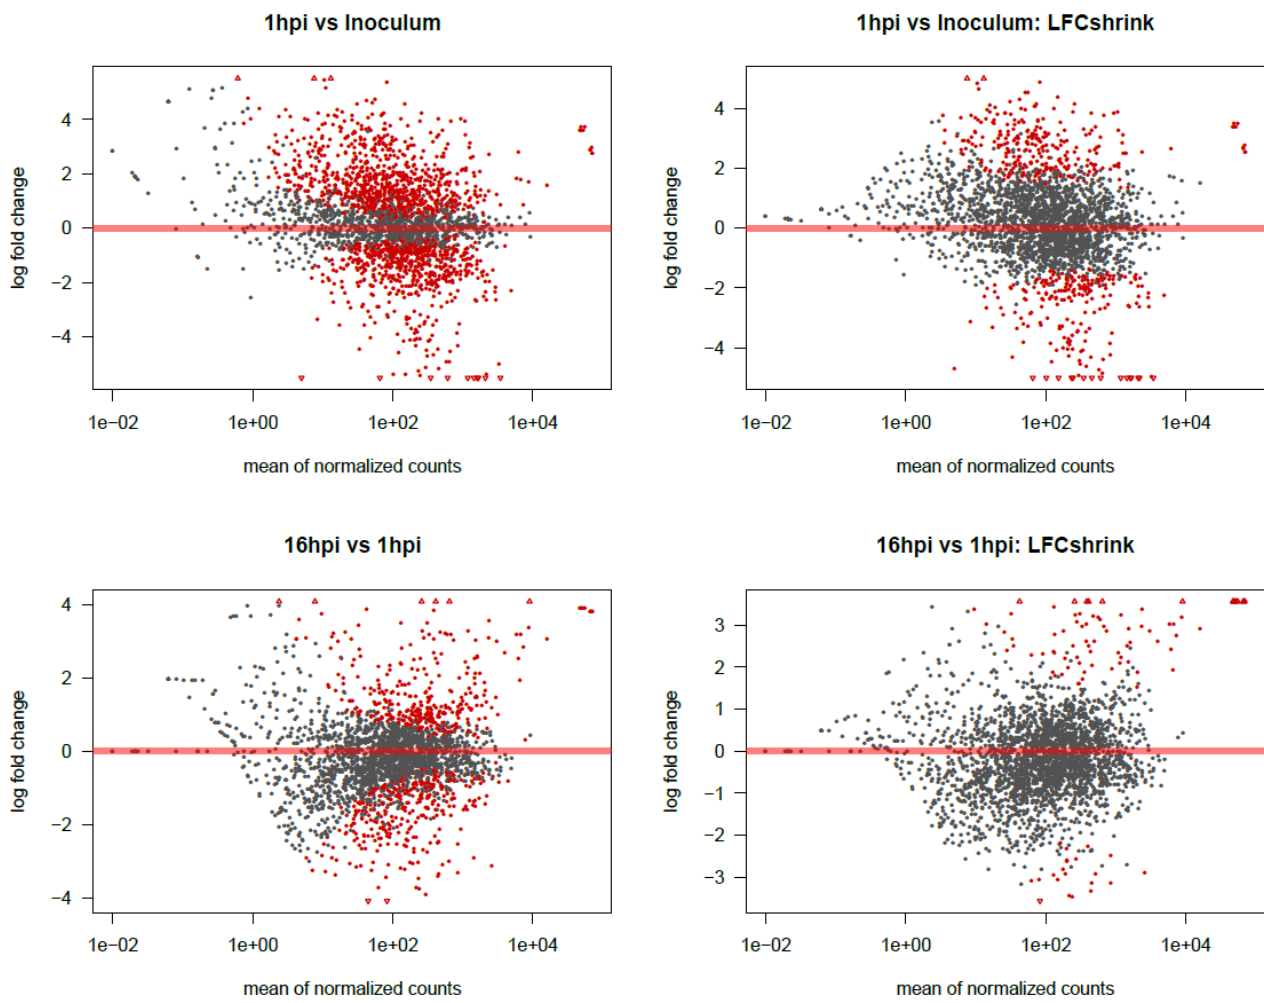

**Supplementary Figure S3:** Using logFC shrinkage to penalize low coverage for *S. aureus* between the two comparisons (1 hpi vs. inoculum (top panels) and 16 hpi vs 1 hpi (bottom panels)). Differentially expressed genes for *S. aureus* above the threshold before (left panels) and after logFC shrinkage (right panels) are marked in red.

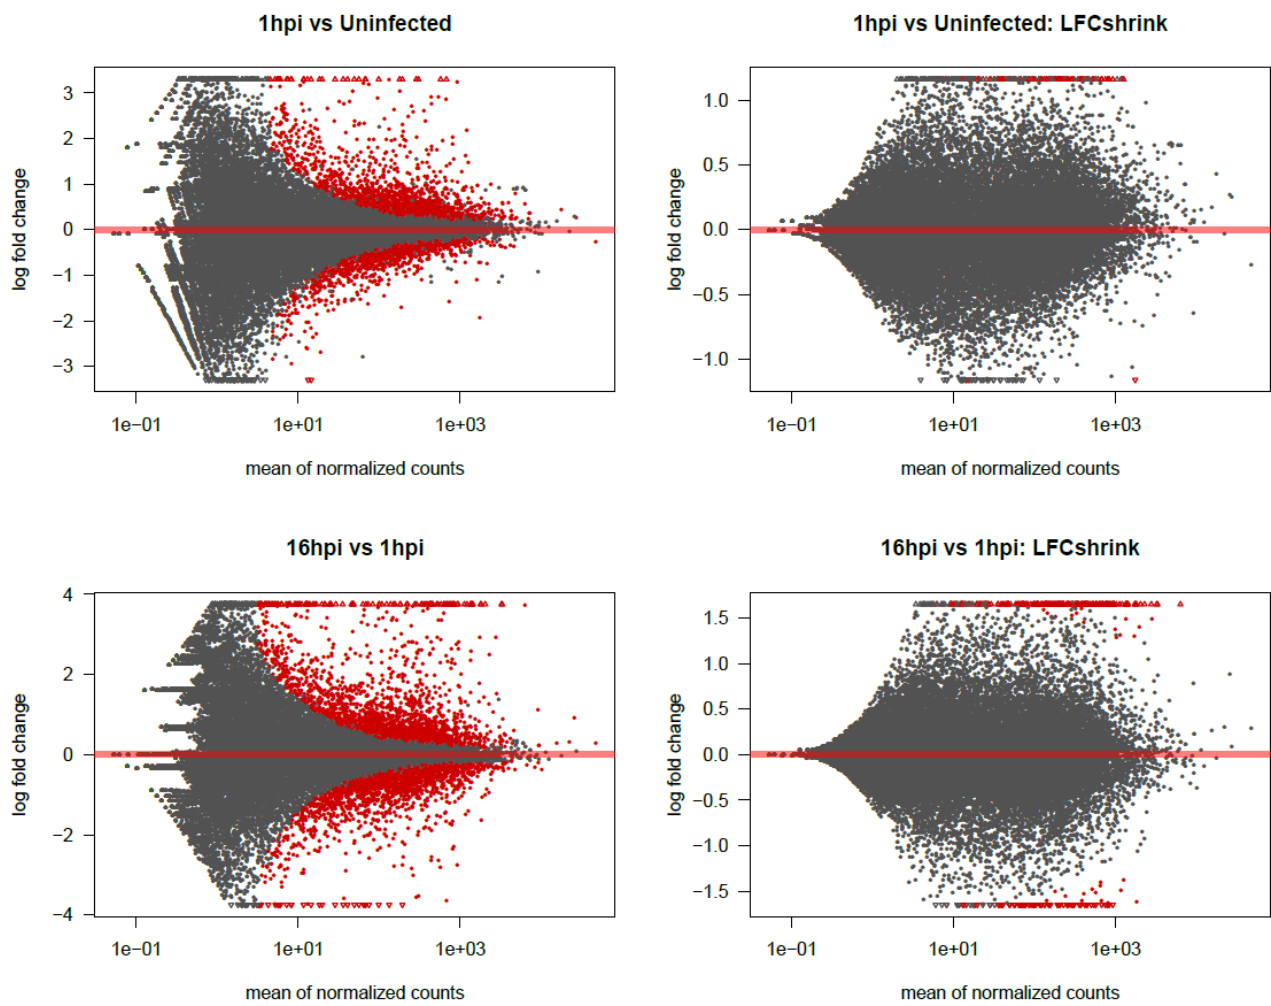

**Supplementary Figure S4:** Using logFC shrinkage to penalize low coverage for HUVECs between the two comparisons (1 hpi vs. uninfected (top panels) and 16 hpi vs 1 hpi (bottom panels)). Differentially expressed genes for HUVECs above the threshold before (left) and after logFC shrinkage (right) are marked in red.

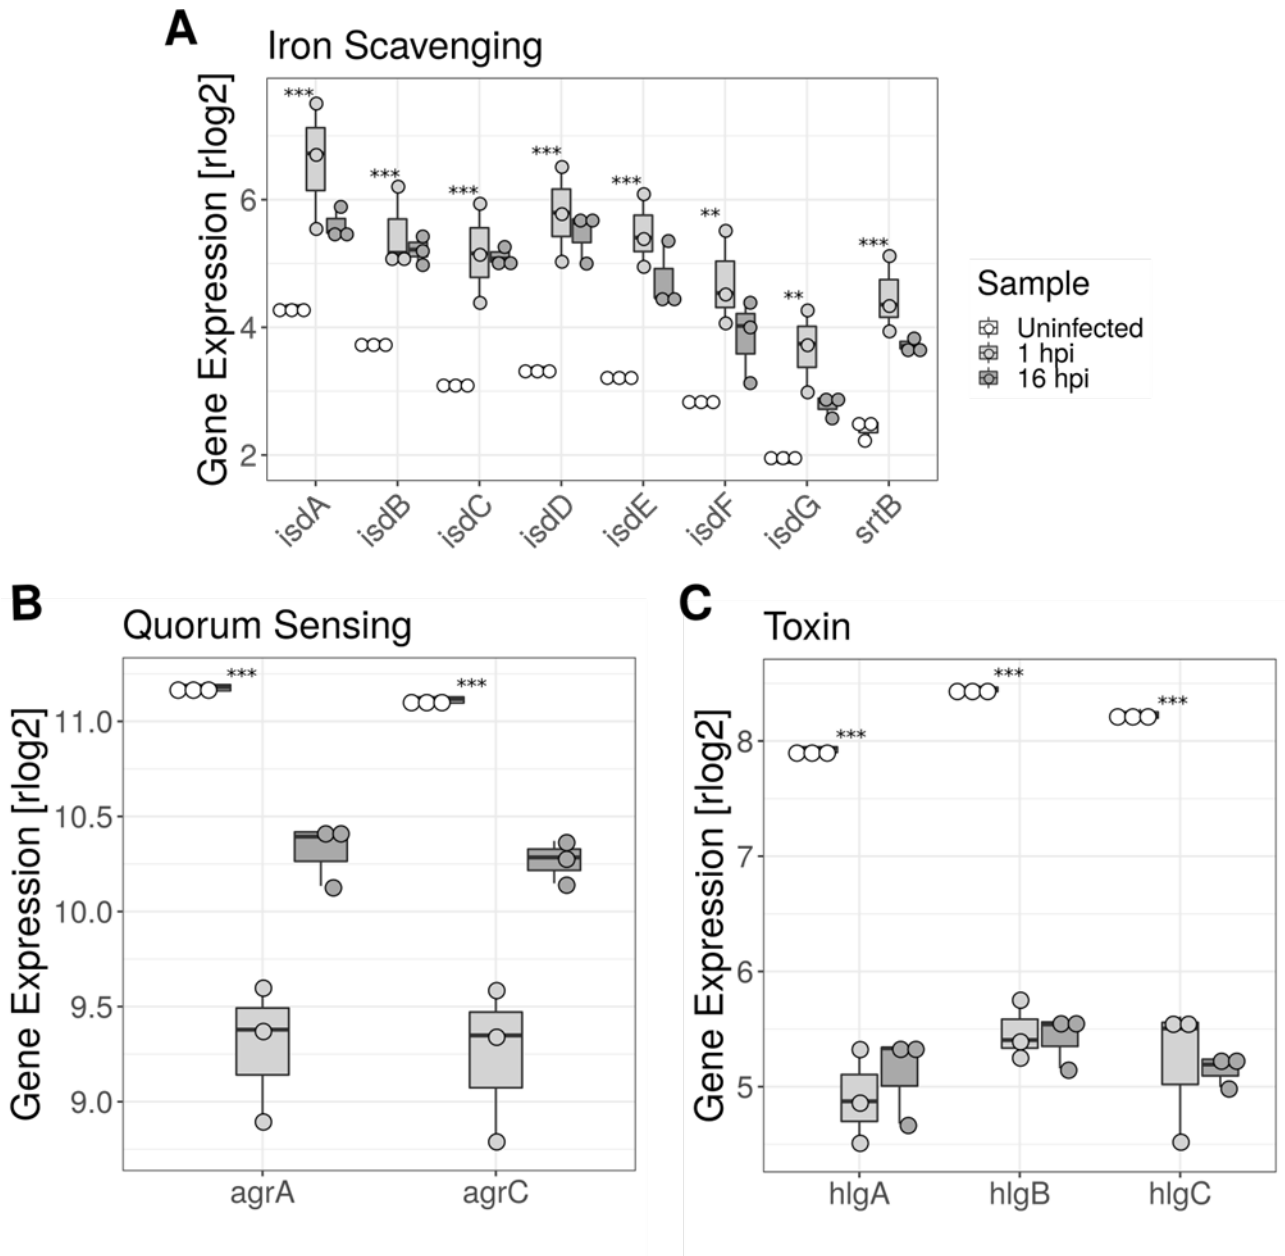

**Supplementary Figure S5:** Examples of differentially expressed genes related to iron scavenging (*isd*), quorum sensing (*agr*), and toxins ( $\gamma$ -hemolysin, *hlg*) at different time-points. \* $p < 0.05$ , \*\* $p < 0.01$ , \*\*\* $p < 0.001$ .

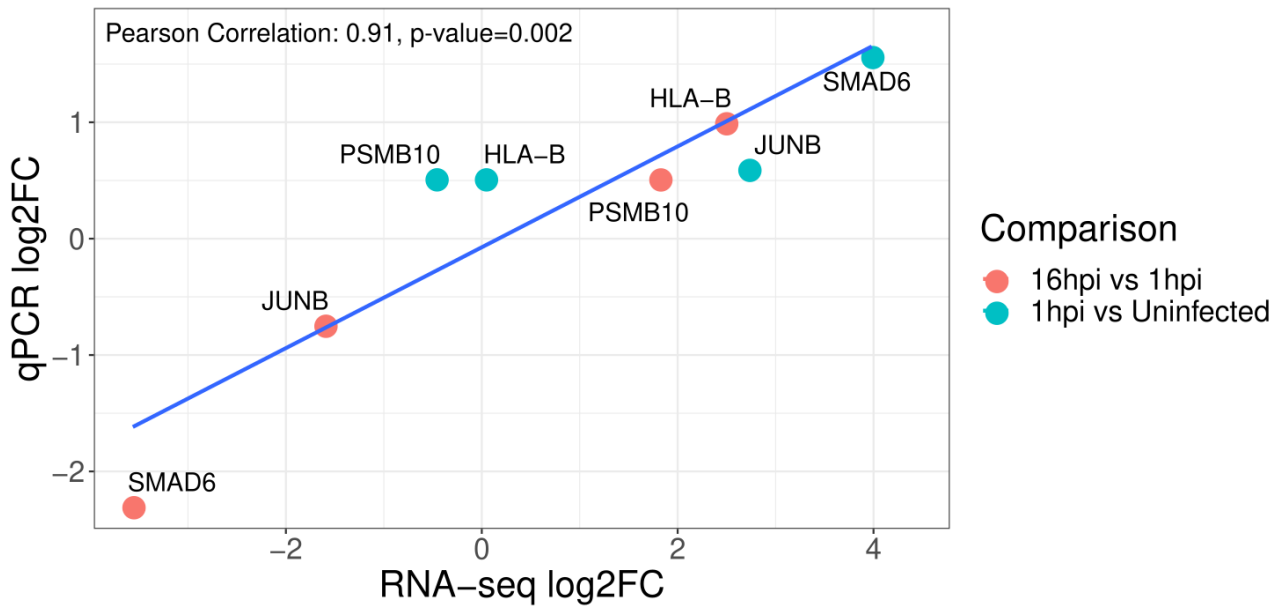

**Supplementary Figure S6:** Pearson correlation between RNAseq and qPCR in the two comparisons (red and blue for 16 hpi vs. 1 hpi and 1 hpi vs. uninfected, respectively) for 4 selected human genes (HLA-B, JUNB, SMAD6, PSMB10). Due to low signal, it was not possible to perform a meaningful comparison for the bacterial genes.

For qPCR, RNA was purified by first lysing the cells with FastPrep FPI20 followed by hot-phenol treatment. The samples were then treated with NEB DNase I kit (New England Biolabs) to remove DNA. For each 180 ng of RNA, 0.2 units of DNase I was added and incubated for 10 min at 37 °C. The DNase I was inactivated at 75 °C for 10 min. cDNA was synthesized using the High Capacity cDNA Reverse Transcription kit (K1671, Thermo Scientific). The samples were then processed in the PCR machine using 25 °C for 10 min, 37 °C for 60 min, 85 °C for 5 min followed by a hold at 4°C. qPCR was performed in a 384-well plate in duplicates. RealQ Plus 2x Master Mix Green (A323406, Ampliqon) was mixed with approx. 10 ng cDNA, 750 nM forward primer, and 750 nM reverse primer (see Supplemental table 4 for primers). The samples were amplified in a LightCycler480 using: pre-incubation at 95°C for 15 min, 45 cycles of 95°C for 15 s, 60°C for 45 s, and 72°C for 45 s. The cycling was followed by a hold at 95°C for 5 s, hold at 60°C for 20 s and a continuous melt from 60°C to 97°C ramping 0.11°C/s with 5 acquisitions per degree. The expression of the human genes was normalized to the human housekeeping gene B2M, while the expression of the bacterial genes was normalized to the housekeeping gene gyrB.

| <b><u>Gene name</u></b> | <b><u>Function 1</u></b> | <b><u>Function 2</u></b> | <b><u>Function 3</u></b> | <b><u>Reference</u></b> |
|-------------------------|--------------------------|--------------------------|--------------------------|-------------------------|
| <i>clfA</i>             | Adhesion                 |                          |                          | 1                       |
| <i>clfB</i>             | Adhesion                 |                          |                          | 1                       |
| <i>coa</i>              | Immune evasion           | Biofilm formation        | Adhesion                 | 1                       |
| <i>vwb</i>              | Immune evasion           | Biofilm formation        | Adhesion                 | 1                       |
| <i>icaA</i>             | Biofilm formation        |                          |                          | 1                       |
| <i>icaB</i>             | Biofilm formation        |                          |                          | 1                       |
| <i>icaC</i>             | Biofilm formation        |                          |                          | 1                       |
| <i>icaD</i>             | Biofilm formation        |                          |                          | 1                       |
| <i>icaR</i>             | Regulation               |                          |                          | 1                       |
| <i>cna</i>              | Adhesion                 |                          |                          | 1                       |
| <i>eap</i>              | Adhesion                 | Immune evasion           |                          | 1                       |
| <i>ebpS</i>             | Adhesion                 |                          |                          | 1                       |
| <i>fnbA</i>             | Adhesion                 | Invasion                 |                          | 1                       |
| <i>fnbB</i>             | Adhesion                 | Invasion                 |                          | 1                       |
| <i>sdrC</i>             | Biofilm formation        | Adhesion                 |                          | 1                       |
| <i>sdrD</i>             | Adhesion                 |                          |                          | 1                       |
| <i>sdrE</i>             | Immune evasion           |                          |                          | 1                       |
| <i>capA</i>             | Immune evasion           |                          |                          | 1                       |
| <i>capB</i>             | Immune evasion           |                          |                          | 1                       |
| <i>capC</i>             | Immune evasion           |                          |                          | 1                       |
| <i>capD</i>             | Immune evasion           |                          |                          | 1                       |
| <i>capE</i>             | Immune evasion           |                          |                          | 1                       |
| <i>capF</i>             | Immune evasion           |                          |                          | 1                       |
| <i>capG</i>             | Immune evasion           |                          |                          | 1                       |
| <i>capH</i>             | Immune evasion           |                          |                          | 1                       |
| <i>capI</i>             | Immune evasion           |                          |                          | 1                       |
| <i>capJ</i>             | Immune evasion           |                          |                          | 1                       |
| <i>capK</i>             | Immune evasion           |                          |                          | 1                       |
| <i>capL</i>             | Immune evasion           |                          |                          | 1                       |
| <i>capM</i>             | Immune evasion           |                          |                          | 1                       |
| <i>capN</i>             | Immune evasion           |                          |                          | 1                       |
| <i>capO</i>             | Immune evasion           |                          |                          | 1                       |
| <i>capP</i>             | Immune evasion           |                          |                          | 1                       |
| <i>efb</i>              | Adhesion                 | Immune evasion           |                          | 1                       |
| <i>aur</i>              | Immune evasion           | Dispersal                |                          | 3                       |
| <i>hysA</i>             | Dispersal                |                          |                          | 1                       |
| <i>sak</i>              | Dispersal                |                          |                          | 1                       |
| <i>geh</i>              | Immune evasion           |                          |                          | 1                       |
| <i>sspB</i>             | Immune evasion           |                          |                          | 1                       |
| <i>sspC</i>             | Regulation               |                          |                          | 1                       |
| <i>adsA</i>             | Immune evasion           |                          |                          | 4                       |
| <i>chp</i>              | Immune evasion           |                          |                          | 4                       |
| <i>sbi</i>              | Adhesion                 |                          |                          | 4                       |
| <i>scn</i>              | Adhesion                 |                          |                          | 1                       |
| <i>spa</i>              | Adhesion                 |                          |                          | 1                       |
| <i>isdA</i>             | Adhesion                 | iron scavenging          |                          | 5,7                     |



|                |                         |   |
|----------------|-------------------------|---|
| <i>isdB</i>    | iron scavenging         | 5 |
| <i>isdC</i>    | iron scavenging         | 5 |
| <i>isdD</i>    | iron scavenging         | 5 |
| <i>isdE</i>    | iron scavenging         | 5 |
| <i>isdF</i>    | iron scavenging         | 5 |
| <i>isdG</i>    | iron scavenging         | 5 |
| <i>isdH</i>    | iron scavenging         | 5 |
| <i>isdI</i>    | iron scavenging         | 5 |
| <i>srtA</i>    | Surface protein sorting | 8 |
| <i>srtB</i>    | Surface protein sorting | 8 |
| <i>agrA</i>    | Quorum sensing          | 2 |
| <i>agrB</i>    | Quorum sensing          | 2 |
| <i>agrC</i>    | Quorum sensing          | 2 |
| <i>adrD</i>    | Quorum sensing          | 2 |
| <i>hla</i>     | Toxin                   | 1 |
| <i>hlb</i>     | Toxin                   | 1 |
| <i>hld</i>     | Toxin                   | 1 |
| <i>eta</i>     | Toxin                   | 2 |
| <i>etb</i>     | Toxin                   | 2 |
| <i>lukS-PV</i> | Toxin                   | 1 |
| <i>lukF-PV</i> | Toxin                   | 1 |
| <i>sea</i>     | Toxin                   | 1 |
| <i>seb</i>     | Toxin                   | 1 |
| <i>sec1</i>    | Toxin                   | 6 |
| <i>sec3</i>    | Toxin                   | 6 |
| <i>sed</i>     | Toxin                   | 1 |
| <i>see</i>     | Toxin                   | 1 |
| <i>seg</i>     | Toxin                   | 1 |
| <i>seh</i>     | Toxin                   | 1 |
| <i>sei</i>     | Toxin                   | 1 |
| <i>sel</i>     | Toxin                   | 1 |
| <i>sem</i>     | Toxin                   | 1 |
| <i>sen</i>     | Toxin                   | 1 |
| <i>seo</i>     | Toxin                   | 1 |
| <i>sep</i>     | Toxin                   | 1 |
| <i>selk</i>    | Toxin                   | 2 |
| <i>selq</i>    | Toxin                   | 2 |
| <i>tsst-1</i>  | Toxin                   | 1 |
| <i>fib</i>     | Adhesion                | 1 |
| <i>lukE</i>    | Toxin                   | 1 |
| <i>lukD</i>    | Toxin                   | 1 |
| <i>lukM</i>    | Toxin                   | 1 |
| <i>hlgC</i>    | Toxin                   | 1 |
| <i>hlgB</i>    | Toxin                   | 1 |
| <i>hlgA</i>    | Toxin                   | 1 |
| <i>sexo</i>    | Toxin                   | 1 |
| <i>set1</i>    | Toxin                   | 1 |
| <i>set2</i>    | Toxin                   | 1 |
| <i>set3</i>    | Toxin                   | 1 |
| <i>set4</i>    | Toxin                   | 1 |

|                  |                |           |   |
|------------------|----------------|-----------|---|
| <i>set5</i>      | Toxin          |           | 1 |
| <i>set6</i>      | Toxin          |           | 1 |
| <i>set7</i>      | Toxin          |           | 1 |
| <i>set8</i>      | Toxin          |           | 1 |
| <i>set9</i>      | Toxin          |           | 1 |
| <i>set10</i>     | Toxin          |           | 1 |
| <i>set11</i>     | Toxin          |           | 1 |
| <i>set12</i>     | Toxin          |           | 1 |
| <i>set13</i>     | Toxin          |           | 1 |
| <i>set14</i>     | Toxin          |           | 1 |
| <i>set15</i>     | Toxin          |           | 1 |
| <i>set16</i>     | Toxin          |           | 1 |
| <i>set17</i>     | Toxin          |           | 1 |
| <i>set18</i>     | Toxin          |           | 1 |
| <i>set19</i>     | Toxin          |           | 1 |
| <i>set20</i>     | Toxin          |           | 1 |
| <i>set21</i>     | Toxin          |           | 1 |
| <i>set22</i>     | Toxin          |           | 1 |
| <i>set23</i>     | Toxin          |           | 1 |
| <i>set24</i>     | Toxin          |           | 1 |
| <i>set25</i>     | Toxin          |           | 1 |
| <i>set26</i>     | Toxin          |           | 1 |
| <i>set30</i>     | Toxin          |           | 1 |
| <i>yent1</i>     | Toxin          |           | 1 |
| <i>yent2</i>     | Toxin          |           | 1 |
| <i>sent-like</i> | Toxin          |           | 1 |
| <i>SEnt</i>      | Toxin          |           | 1 |
| <i>esxA</i>      | Secretion      |           | 1 |
| <i>esaA</i>      | Secretion      |           | 1 |
| <i>essa</i>      | Secretion      |           | 1 |
| <i>esaB</i>      | Secretion      |           | 1 |
| <i>essB</i>      | Secretion      |           | 1 |
| <i>essC</i>      | Secretion      |           | 1 |
| <i>esaC</i>      | Secretion      |           | 1 |
| <i>esxB</i>      | Secretion      |           | 1 |
| <i>isb</i>       | Immune evasion |           | 1 |
| <i>nuc</i>       | Exoenzyme      |           | 1 |
| <i>lip</i>       | Immune evasion | Exoenzyme | 1 |
| <i>atl</i>       | Adhesion       |           | 1 |
| <i>ebh</i>       | Adhesion       |           | 1 |
| <i>psmA1</i>     | Toxin          |           | 4 |
| <i>psmA2</i>     | Toxin          |           | 4 |
| <i>psmA3</i>     | Toxin          |           | 4 |
| <i>psmA4</i>     | Toxin          |           | 4 |
| <i>psmB1</i>     | Toxin          |           | 4 |
| <i>psmB2</i>     | Toxin          |           | 4 |
| <i>sarA</i>      | Regulation     |           | 2 |
| <i>sarT</i>      | Regulation     |           | 2 |
| <i>sarU</i>      | Regulation     |           | 2 |
| <i>sarH1</i>     | Regulation     |           | 2 |

|              |            |   |
|--------------|------------|---|
| <i>rot</i>   | Regulation | 2 |
| <i>mgrA</i>  | Regulation | 2 |
| <i>sigB</i>  | Regulation | 2 |
| <i>sigH</i>  | Regulation | 2 |
| <i>saeR</i>  | Regulation | 2 |
| <i>saeS</i>  | Regulation | 2 |
| <i>saeP</i>  | Regulation | 2 |
| <i>saeQ</i>  | Regulation | 2 |
| <i>srrA</i>  | Regulation | 2 |
| <i>srrB</i>  | Regulation | 2 |
| <i>airSR</i> | Regulation | 2 |

**Supplementary Table S1:** List of virulence factors used for the gene enrichment analysis in Figure 4C . The list is based on <sup>1-8</sup>.

## Supplementary Table S2

Six tables containing the differential expressed genes for *S. aureus* and HUVECs between all 6 comparisons (1 hpi vs. inoculum/uninfected, 16hpi vs. inoculum/uninfected 16hpi vs. 1hpi).

### *S. aureus* - 1hpi vs. inoculum

| Locus_id       | Protein_id  | Gene_id | Name  | Description                                                                                                                                                                                                                                             | baseMean | log2FoldChange | lfcSE    | stat     | pvalue   | padj     | Cluster   |
|----------------|-------------|---------|-------|---------------------------------------------------------------------------------------------------------------------------------------------------------------------------------------------------------------------------------------------------------|----------|----------------|----------|----------|----------|----------|-----------|
| SAOUHSC_00187  | YP_498784.1 | 3919501 | pflB  | Formate acetyltransferase (EC 2.3.1.54) (Pyruvate formate-lyase)                                                                                                                                                                                        | 3453.909 | -6.83191       | 0.153241 | -38.0571 | 0        | 0        | Cluster 1 |
| SAOUHSC_00608  | YP_499171.1 | 3918927 | adh   | Alcohol dehydrogenase (ADH) (EC 1.1.1.1)                                                                                                                                                                                                                | 1667.49  | -7.0422        | 0.248233 | -24.3408 | 7.3E-131 | 9.2E-128 | Cluster 1 |
| SAOUHSC_01450  | YP_499971.1 | 3920227 |       | Uncharacterized protein                                                                                                                                                                                                                                 | 1612.479 | -7.77182       | 0.279946 | -24.1897 | 2.9E-129 | 2.4E-126 | Cluster 1 |
| SAOUHSC_00188  | YP_498785.1 | 3919502 | pflA  | Pyruvate formate-lyase-activating enzyme (PFL-activating enzyme) (EC 1.97.1.4)                                                                                                                                                                          | 1444.763 | -6.32225       | 0.269448 | -19.7524 | 7.65E-87 | 4.84E-84 | Cluster 1 |
| SAOUHSC_02941  | YP_501393.1 | 3921647 |       | Anaerobic ribonucleoside-triphosphate reductase-activating protein (EC 1.97.1.-)                                                                                                                                                                        | 455.598  | -5.15122       | 0.210942 | -19.6795 | 3.23E-86 | 1.64E-83 | Cluster 1 |
| SAOUHSC_01451  | YP_499972.1 | 3920228 | tdcB  | L-threonine dehydratase catabolic TdcB (EC 4.3.1.19) (Threonine deaminase)                                                                                                                                                                              | 609.8333 | -8.46058       | 0.397835 | -18.7529 | 1.83E-78 | 7.74E-76 | Cluster 1 |
| SAOUHSC_01452  | YP_499973.1 | 3919897 | ald1  | Alanine dehydrogenase 1 (EC 1.4.1.1)                                                                                                                                                                                                                    | 347.955  | -7.34059       | 0.37085  | -17.0975 | 1.55E-65 | 5.61E-63 | Cluster 1 |
| SAOUHSC_01788  | YP_500293.1 | 3920430 | thrS  | Threonine--tRNA ligase (EC 6.1.1.3) (Threonyl-tRNA synthetase) (ThrRS)                                                                                                                                                                                  | 3281.621 | -4.95399       | 0.237302 | -16.6623 | 2.46E-62 | 7.81E-60 | Cluster 1 |
| SAOUHSC_02648  | YP_501110.1 | 3921210 |       | L-lactate permease                                                                                                                                                                                                                                      | 2186.078 | -5.32147       | 0.260119 | -16.6134 | 5.57E-62 | 1.57E-59 | Cluster 1 |
| SAOUHSC_02582  | YP_501044.1 | 3921578 |       | Putative formate dehydrogenase SAOUHSC_02582 (EC 1.17.1.9)                                                                                                                                                                                              | 3000.266 | -2.62366       | 0.103215 | -15.7309 | 9.29E-56 | 2.35E-53 | Cluster 1 |
| SAOUHSC_02680  | YP_501142.1 | 3921242 |       | Nitrate reductase, beta subunit (EC 1.7.99.4)                                                                                                                                                                                                           | 234.5113 | -5.21124       | 0.271697 | -15.4998 | 3.48E-54 | 8.02E-52 | Cluster 1 |
| SAOUHSC_00569  | YP_499138.1 | 3920611 |       | Uncharacterized protein                                                                                                                                                                                                                                 | 1268.479 | 3.117786       | 0.13835  | 15.30749 | 6.81E-53 | 1.44E-50 | Cluster 5 |
| SAOUHSC_02742  | YP_501203.1 | 3921616 |       | Amino acid transporter, putative                                                                                                                                                                                                                        | 244.4066 | -4.03939       | 0.202368 | -15.0191 | 5.5E-51  | 1.07E-48 | Cluster 1 |
| SAOUHSC_01170  | YP_499709.1 | 3920921 | carB  | Carbamoyl-phosphate synthase large chain (EC 6.3.5.5) (Carbamoyl-phosphate synthetase ammonia chain)                                                                                                                                                    | 835.1016 | -3.84748       | 0.191772 | -14.8483 | 7.14E-50 | 1.29E-47 | Cluster 1 |
| SAOUHSC_02781  | YP_501241.1 | 3921436 |       | Uncharacterized protein                                                                                                                                                                                                                                 | 244.7367 | -5.36699       | 0.300242 | -14.5449 | 6.29E-48 | 1.06E-45 | Cluster 1 |
| SAOUHSC_01888  | YP_500390.1 | 3920836 |       | Riboflavin synthase, alpha subunit (EC 2.5.1.9)                                                                                                                                                                                                         | 132.0296 | 4.005524       | 0.207677 | 14.47212 | 1.82E-47 | 2.88E-45 | Cluster 5 |
| SAOUHSC_02942  | YP_501394.1 | 3921648 |       | Anaerobic ribonucleoside-triphosphate reductase, putative (EC 1.17.4.2)                                                                                                                                                                                 | 643.4968 | -4.86424       | 0.267678 | -14.4361 | 3.07E-47 | 4.57E-45 | Cluster 1 |
| SAOUHSC_01448  | YP_499970.1 | 3920226 | norB  | Quinolone resistance protein NorB                                                                                                                                                                                                                       | 1179.552 | -6.83414       | 0.419881 | -13.8947 | 6.82E-44 | 9.6E-42  | Cluster 1 |
| SAOUHSC_02400  | YP_500876.1 | 3919615 |       | PTS system, mannitol-specific component, putative                                                                                                                                                                                                       | 382.8435 | -4.60841       | 0.26078  | -13.837  | 1.52E-43 | 2.03E-41 | Cluster 1 |
| SAOUHSC_00206  | YP_498803.1 | 3920362 | ldh1  | L-lactate dehydrogenase 1 (L-LDH 1) (EC 1.1.1.27)                                                                                                                                                                                                       | 2101.399 | -6.8449        | 0.424822 | -13.7585 | 4.53E-43 | 5.74E-41 | Cluster 1 |
| SAOUHSC_02684  | YP_501146.1 | 3919703 |       | Assimilatory nitrite reductase [NAD(P)H], large subunit, putative (EC 1.7.1.4)                                                                                                                                                                          | 152.5018 | -5.30536       | 0.317354 | -13.5664 | 6.34E-42 | 7.64E-40 | Cluster 1 |
| SAOUHSC_02581  | YP_501043.1 | 3921577 |       | Uncharacterized protein                                                                                                                                                                                                                                 | 707.0486 | -2.66148       | 0.126628 | -13.1209 | 2.5E-39  | 2.88E-37 | Cluster 1 |
| SAOUHSC_02676  | YP_501138.1 | 3921238 | nreB  | Oxygen sensor histidine kinase NreB (EC 2.7.13.3) (Nitrogen regulation protein B)                                                                                                                                                                       | 422.1198 | -3.37404       | 0.182386 | -13.0166 | 9.85E-39 | 1.09E-36 | Cluster 1 |
| SAOUHSC_01889  | YP_500391.1 | 3920837 |       | Riboflavin biosynthesis protein RibD [Includes: Diaminohydroxyphosphoribosylaminopyrimidine deaminase (DRAP deaminase) (EC 3.5.4.26) (Riboflavin-specific deaminase); 5-amino-6-(5-phosphoribosylamino)uracil reductase (EC 1.1.1.193) (HTP reductase)] | 259.2004 | 4.1706         | 0.252813 | 12.54129 | 4.44E-36 | 4.68E-34 | Cluster 5 |
| SAOUHSC_02678  | YP_501140.1 | 3921240 |       | Respiratory nitrate reductase, gamma subunit (EC 1.7.99.4)                                                                                                                                                                                              | 183.9806 | -3.65135       | 0.212294 | -12.4891 | 8.57E-36 | 8.68E-34 | Cluster 1 |
| SAOUHSC_02679  | YP_501141.1 | 3921241 |       | Respiratory nitrate reductase, delta subunit, putative                                                                                                                                                                                                  | 101.7287 | -5.31944       | 0.356693 | -12.1097 | 9.39E-34 | 9.15E-32 | Cluster 1 |
| SAOUHSC_T00038 |             | 3921164 |       |                                                                                                                                                                                                                                                         | 50.99545 | 4.55411        | 0.295416 | 12.03087 | 2.45E-33 | 2.3E-31  | Cluster 5 |
| SAOUHSC_01168  | YP_499707.1 | 3920919 | pyrC  | Dihydroorotase (DHOase) (EC 3.5.2.3)                                                                                                                                                                                                                    | 339.0617 | -4.08877       | 0.26513  | -11.65   | 2.29E-31 | 2.08E-29 | Cluster 1 |
| SAOUHSC_02743  | YP_501204.1 | 3921617 |       | Amino acid ABC transporter, permease protein, putative                                                                                                                                                                                                  | 117.5647 | -3.85758       | 0.247403 | -11.5503 | 7.36E-31 | 6.43E-29 | Cluster 1 |
| SAOUHSC_00330  | YP_498919.1 | 3919595 |       | Uncharacterized protein                                                                                                                                                                                                                                 | 69.58169 | 4.090535       | 0.269336 | 11.47464 | 1.77E-30 | 1.49E-28 | Cluster 5 |
| SAOUHSC_01165  | YP_499705.1 | 3920917 |       | Uracil permease, putative                                                                                                                                                                                                                               | 213.025  | -3.695         | 0.238497 | -11.3    | 1.31E-29 | 1.07E-27 | Cluster 1 |
| SAOUHSC_01887  | YP_500389.1 | 3920835 | ribBA | Riboflavin biosynthesis protein RibBA [Includes: 3,4-dihydroxy-2-butanone 4-phosphate synthase (DHBP synthase) (EC 4.1.99.12); GTP cyclohydrolase-2 (EC 3.5.4.25) (GTP cyclohydrolase II)]                                                              | 245.3414 | 3.883323       | 0.25693  | 11.22219 | 3.17E-29 | 2.51E-27 | Cluster 5 |
| SAOUHSC_02671  | YP_501133.1 | 3921233 |       | conserved hypothetical protein                                                                                                                                                                                                                          | 157.9785 | -3.2679        | 0.203513 | -11.1438 | 7.68E-29 | 5.9E-27  | Cluster 1 |
| SAOUHSC_T00021 |             | 3921340 |       |                                                                                                                                                                                                                                                         | 45.62899 | 3.625318       | 0.236163 | 11.11657 | 1.04E-28 | 7.77E-27 | Cluster 6 |
| SAOUHSC_02741  | YP_501202.1 | 3921615 |       | Amino acid ABC transporter, permease protein, putative                                                                                                                                                                                                  | 205.4304 | -3.82047       | 0.2564   | -11.0003 | 3.81E-28 | 2.76E-26 | Cluster 1 |
| SAOUHSC_01171  | YP_499710.1 | 3920922 | pyrF  | Orotidine 5'-phosphate decarboxylase (EC 4.1.1.23) (OMP decarboxylase) (OMPDCase) (OMPdecase)                                                                                                                                                           | 224.673  | -3.76739       | 0.255201 | -10.844  | 2.13E-27 | 1.5E-25  | Cluster 1 |
| SAOUHSC_01169  | YP_499708.1 | 3920920 | carA  | Carbamoyl-phosphate synthase small chain (EC 6.3.5.5) (Carbamoyl-phosphate synthetase glutamine chain)                                                                                                                                                  | 304.26   | -4.42032       | 0.315796 | -10.8308 | 2.46E-27 | 1.68E-25 | Cluster 1 |
| SAOUHSC_02710  | YP_501172.1 | 3919729 | hlgB  | Gamma-hemolysin component B (H-gamma-1) (H-gamma-I) (Leukocidin f subunit)                                                                                                                                                                              | 205.5472 | -4.05636       | 0.28232  | -10.8259 | 2.6E-27  | 1.73E-25 | Cluster 1 |
| SAOUHSC_T00042 |             | 3921031 |       |                                                                                                                                                                                                                                                         | 78.04391 | 3.595235       | 0.239838 | 10.82078 | 2.74E-27 | 1.78E-25 | Cluster 5 |

|                |             |         |       |                                                                                                                |          |          |          |          |          |          |           |
|----------------|-------------|---------|-------|----------------------------------------------------------------------------------------------------------------|----------|----------|----------|----------|----------|----------|-----------|
| SAOUHSC_02606  | YP_501067.1 | 3921384 | hutI  | Imidazolonepropionase (EC 3.5.2.7)<br>(Imidazolone-5-propionate hydrolase)                                     | 289.352  | -3.42114 | 0.227298 | -10.6519 | 1.71E-26 | 1.08E-24 | Cluster 1 |
| SAOUHSC_00204  | YP_498801.1 | 3920360 |       | Globin domain protein                                                                                          | 158.2295 | -3.3466  | 0.220709 | -10.6321 | 2.11E-26 | 1.31E-24 | Cluster 1 |
| SAOUHSC_01022  | YP_499571.1 | 3920282 |       | Uncharacterized protein                                                                                        | 322.3067 | -4.11566 | 0.29636  | -10.5131 | 7.52E-26 | 4.54E-24 | Cluster 1 |
| SAOUHSC_01166  | YP_499706.1 | 3920918 | pyrB  | Aspartate carbamoyltransferase (EC 2.1.3.2)<br>(Aspartate transcarbamylase) (ATCase)                           | 214.4037 | -4.2648  | 0.312828 | -10.4364 | 1.69E-25 | 9.96E-24 | Cluster 1 |
| SAOUHSC_02388  | YP_500865.1 | 3919605 |       | Uncharacterized protein                                                                                        | 282.6876 | -3.4913  | 0.23904  | -10.4221 | 1.97E-25 | 1.13E-23 | Cluster 1 |
| SAOUHSC_01172  | YP_499711.1 | 3920923 | pyrE  | Orotate phosphoribosyltransferase (OPRT)<br>(OPRTase) (EC 2.4.2.10)                                            | 241.2461 | -3.57641 | 0.247738 | -10.3997 | 2.49E-25 | 1.4E-23  | Cluster 1 |
| SAOUHSC_01063  | YP_499609.1 | 3921725 |       | Uncharacterized protein                                                                                        | 295.2128 | 2.329648 | 0.129532 | 10.26498 | 1.01E-24 | 5.52E-23 | Cluster 5 |
| SAOUHSC_01877  | YP_500380.1 | 3921766 |       | Uncharacterized protein                                                                                        | 140.2976 | 2.70296  | 0.165915 | 10.26407 | 1.02E-24 | 5.52E-23 | Cluster 6 |
| SAOUHSC_02675  | YP_501137.1 | 3921237 | nreC  | Oxygen regulatory protein NreC (Nitrogen<br>regulation protein C)                                              | 204.5879 | -3.0372  | 0.204214 | -9.97585 | 1.94E-23 | 1.03E-21 | Cluster 1 |
| SAOUHSC_T00039 |             | 3921165 |       |                                                                                                                | 44.51275 | 4.002961 | 0.303141 | 9.906138 | 3.91E-23 | 2.02E-21 | Cluster 5 |
| SAOUHSC_01902  | YP_500403.1 | 3920849 |       | Uncharacterized protein                                                                                        | 71.18166 | 4.094818 | 0.314082 | 9.853528 | 6.62E-23 | 3.35E-21 | Cluster 6 |
| SAOUHSC_02683  | YP_501145.1 | 3919702 |       | Assimilatory nitrite reductase [NAD(P)H], small<br>subunit, putative (EC 1.7.1.4)                              | 65.4538  | -6.09159 | 0.517147 | -9.84553 | 7.17E-23 | 3.56E-21 | Cluster 1 |
| SAOUHSC_02677  | YP_501139.1 | 3921239 |       | Uncharacterized protein                                                                                        | 247.2836 | -3.18264 | 0.222044 | -9.82978 | 8.38E-23 | 4.08E-21 | Cluster 1 |
| SAOUHSC_01041  | YP_499590.1 | 3919889 |       | Pyruvate dehydrogenase complex, E1<br>component, pyruvate dehydrogenase beta<br>subunit, putative (EC 1.2.4.1) | 2175.361 | -2.64744 | 0.168609 | -9.77074 | 1.5E-22  | 7.19E-21 | Cluster 1 |
| SAOUHSC_T00030 |             | 3921156 |       |                                                                                                                | 48.53235 | 3.534514 | 0.260112 | 9.743916 | 1.96E-22 | 9.19E-21 | Cluster 5 |
| SAOUHSC_01021  | YP_499570.1 | 3920281 |       | Uncharacterized protein                                                                                        | 846.8312 | -4.25643 | 0.335025 | -9.71995 | 2.48E-22 | 1.14E-20 | Cluster 1 |
| SAOUHSC_00699  | YP_499258.1 | 3921003 |       | Deoxyribodipyrimidine photolyase, putative (EC<br>4.1.99.3)                                                    | 387.2192 | -2.49824 | 0.154247 | -9.7132  | 2.65E-22 | 1.2E-20  | Cluster 1 |
| SAOUHSC_T00022 |             | 3921148 |       |                                                                                                                | 63.99702 | 3.155653 | 0.223883 | 9.628461 | 6.06E-22 | 2.7E-20  | Cluster 5 |
| SAOUHSC_02887  | YP_501340.1 | 3921556 | isaA  | Probable transglycosylase IsaA (EC 3.2.-.-)<br>(Immunodominant staphylococcal antigen A)                       | 1074.424 | 3.872222 | 0.300908 | 9.545195 | 1.36E-21 | 5.94E-20 | Cluster 5 |
| SAOUHSC_02389  | YP_500866.1 | 3919606 |       | Cation efflux family protein, putative                                                                         | 889.8649 | -3.50087 | 0.264573 | -9.45247 | 3.31E-21 | 1.42E-19 | Cluster 1 |
| SAOUHSC_T00035 |             | 3921161 |       |                                                                                                                | 31.81945 | 3.797655 | 0.296499 | 9.435629 | 3.89E-21 | 1.64E-19 | Cluster 5 |
| SAOUHSC_02687  | YP_501149.1 | 3919706 |       | Formate/nitrite transporter, putative                                                                          | 172.637  | -3.28552 | 0.243035 | -9.40407 | 5.25E-21 | 2.18E-19 | Cluster 1 |
| SAOUHSC_00704  | YP_499263.1 | 3921008 |       | Uncharacterized protein                                                                                        | 73.72626 | 3.105726 | 0.224298 | 9.388091 | 6.11E-21 | 2.46E-19 | Cluster 6 |
| SAOUHSC_01040  | YP_499589.1 | 3919888 | pdhA  | Pyruvate dehydrogenase E1 component subunit<br>alpha (EC 1.2.4.1)                                              | 2002.427 | -2.51314 | 0.161178 | -9.38804 | 6.11E-21 | 2.46E-19 | Cluster 1 |
| SAOUHSC_02830  | YP_501289.1 | 3921269 |       | D-lactate dehydrogenase, putative (EC 1.1.1.28)                                                                | 665.0548 | -4.41531 | 0.364324 | -9.37436 | 6.96E-21 | 2.76E-19 | Cluster 1 |
| SAOUHSC_T00012 |             | 3921331 |       |                                                                                                                | 54.87241 | 3.232593 | 0.241159 | 9.257775 | 2.09E-20 | 8.14E-19 | Cluster 5 |
| SAOUHSC_02401  | YP_500877.1 | 3919616 |       | Uncharacterized protein                                                                                        | 367.9559 | -2.82336 | 0.197497 | -9.23234 | 2.65E-20 | 1.02E-18 | Cluster 1 |
| SAOUHSC_01979  | YP_500476.1 | 3920455 |       | Uncharacterized protein                                                                                        | 74.18777 | 4.156165 | 0.347575 | 9.080521 | 1.08E-19 | 4.09E-18 | Cluster 5 |
| SAOUHSC_00965  | YP_499518.1 | 3920676 |       | Uncharacterized protein                                                                                        | 441.4207 | 2.169834 | 0.129105 | 9.061112 | 1.29E-19 | 4.81E-18 | Cluster 5 |
| SAOUHSC_00229  | YP_498824.1 | 3920304 | scdA  | Iron-sulfur cluster repair protein ScdA (Cell wall-<br>related protein ScdA)                                   | 83.45119 | -3.16364 | 0.239161 | -9.0468  | 1.47E-19 | 5.41E-18 | Cluster 1 |
| SAOUHSC_01173  | YP_499712.1 | 3920924 |       | Uncharacterized protein                                                                                        | 86.11309 | -3.23184 | 0.251294 | -8.88141 | 6.6E-19  | 2.39E-17 | Cluster 1 |
| SAOUHSC_00907  | YP_499460.1 | 3921753 |       | UPF0344 protein SAOUHSC_00907                                                                                  | 53.6114  | 2.873757 | 0.213792 | 8.764411 | 1.88E-18 | 6.7E-17  | Cluster 6 |
| SAOUHSC_T00032 |             | 3921158 |       |                                                                                                                | 95.21462 | 3.043755 | 0.234041 | 8.732483 | 2.49E-18 | 8.77E-17 | Cluster 5 |
| SAOUHSC_01878  | YP_500381.1 | 3921767 |       | Uncharacterized protein                                                                                        | 81.38882 | 2.51522  | 0.17355  | 8.730715 | 2.53E-18 | 8.78E-17 | Cluster 6 |
| SAOUHSC_02134  | YP_500624.1 | 3921204 |       | Nitric oxide synthase oxygenase (EC 1.14.14.47)                                                                | 185.2464 | -2.40717 | 0.16132  | -8.72283 | 2.71E-18 | 9.29E-17 | Cluster 1 |
| SAOUHSC_02682  | YP_501144.1 | 3919701 |       | Uroporphyrin-III C-methyltransferase, putative<br>(EC 2.1.1.107)                                               | 121.8177 | -4.47132 | 0.401237 | -8.65154 | 5.08E-18 | 1.72E-16 | Cluster 1 |
| SAOUHSC_02468  | YP_500936.1 | 3919031 |       | Acetolactate synthase, putative (EC 2.2.1.6)                                                                   | 580.4931 | -4.75429 | 0.436114 | -8.60851 | 7.4E-18  | 2.47E-16 | Cluster 1 |
| SAOUHSC_02589  | YP_501051.1 | 3921585 |       | Uncharacterized protein                                                                                        | 783.6085 | -2.54649 | 0.181242 | -8.53272 | 1.43E-17 | 4.7E-16  | Cluster 1 |
| SAOUHSC_01670  | YP_500181.1 | 3920082 |       | Cytidine deaminase (EC 3.5.4.5) (Cytidine<br>aminohydrolase)                                                   | 146.2681 | -2.54578 | 0.181297 | -8.52623 | 1.51E-17 | 4.91E-16 | Cluster 1 |
| SAOUHSC_02681  | YP_501143.1 | 3921243 |       | Nitrate reductase, alpha subunit (EC 1.7.99.4)                                                                 | 313.209  | -4.55455 | 0.419967 | -8.46388 | 2.59E-17 | 8.3E-16  | Cluster 1 |
| SAOUHSC_00540  | YP_499112.1 | 3920820 |       | Uncharacterized protein                                                                                        | 34.75235 | 3.298368 | 0.274348 | 8.377572 | 5.4E-17  | 1.71E-15 | Cluster 5 |
| SAOUHSC_01789  | YP_500294.1 | 3920431 |       | Uncharacterized protein                                                                                        | 319.8197 | -3.21551 | 0.266964 | -8.29893 | 1.05E-16 | 3.29E-15 | Cluster 1 |
| SAOUHSC_T0009  |             | 3921328 |       |                                                                                                                | 70.85236 | 3.259777 | 0.272974 | 8.278347 | 1.25E-16 | 3.86E-15 | Cluster 5 |
| SAOUHSC_01019  | YP_499569.1 | 3920280 |       | Uncharacterized protein                                                                                        | 445.9257 | -4.31597 | 0.40217  | -8.24519 | 1.65E-16 | 5.03E-15 | Cluster 1 |
| SAOUHSC_T00033 |             | 3921159 |       |                                                                                                                | 85.13654 | 2.870564 | 0.227011 | 8.239968 | 1.72E-16 | 5.2E-15  | Cluster 5 |
| SAOUHSC_01158  | YP_499698.1 | 3920716 |       | Uncharacterized protein                                                                                        | 422.666  | 1.903364 | 0.111325 | 8.114623 | 4.87E-16 | 1.45E-14 | Cluster 5 |
| SAOUHSC_01903  | YP_500404.1 | 3920850 | crcB1 | Putative fluoride ion transporter CrcB 1                                                                       | 18.27616 | 3.621373 | 0.325298 | 8.05838  | 7.73E-16 | 2.28E-14 | Cluster 6 |
| SAOUHSC_02467  | YP_500935.1 | 3919030 |       | Alpha-acetolactate decarboxylase (EC 4.1.1.5)                                                                  | 296.6827 | -4.93624 | 0.489254 | -8.04539 | 8.6E-16  | 2.5E-14  | Cluster 1 |
| SAOUHSC_02708  | YP_501170.1 | 3919727 |       | Gamma-hemolysin h-gamma-ii subunit, putative                                                                   | 143.3926 | -4.07796 | 0.384625 | -8.00249 | 1.22E-15 | 3.51E-14 | Cluster 1 |
| SAOUHSC_T00055 |             | 3921044 |       |                                                                                                                | 79.92044 | 2.631763 | 0.206438 | 7.904368 | 2.69E-15 | 7.67E-14 | Cluster 5 |
| SAOUHSC_01042  | YP_499591.1 | 3919890 |       | Dihydrolipoamide acetyltransferase component<br>of pyruvate dehydrogenase complex (EC 2.3.1.-)                 | 2923.992 | -2.34198 | 0.171272 | -7.83537 | 4.67E-15 | 1.32E-13 | Cluster 1 |
| SAOUHSC_01895  | YP_500396.1 | 3920842 |       | Uncharacterized protein                                                                                        | 502.7795 | 2.619933 | 0.209082 | 7.747844 | 9.35E-15 | 2.6E-13  | Cluster 5 |
| SAOUHSC_T00053 |             | 3921042 |       |                                                                                                                | 37.64932 | 3.021271 | 0.262652 | 7.695611 | 1.41E-14 | 3.88E-13 | Cluster 5 |
| SAOUHSC_02546  | YP_501009.1 | 3921135 |       | Molybdenum transport ATP-binding protein<br>ModC, putative                                                     | 170.0459 | -2.42222 | 0.186365 | -7.63136 | 2.32E-14 | 6.33E-13 | Cluster 1 |
| SAOUHSC_T00051 |             | 3921040 |       |                                                                                                                | 92.05049 | 3.667413 | 0.350632 | 7.607446 | 2.8E-14  | 7.54E-13 | Cluster 5 |

|                |             |         |       |                                                                                                                                           |          |          |          |          |          |          |           |
|----------------|-------------|---------|-------|-------------------------------------------------------------------------------------------------------------------------------------------|----------|----------|----------|----------|----------|----------|-----------|
| SAOUHSC_01886  | YP_500388.1 | 3920834 | ribH  | 6,7-dimethyl-8-ribityllumazine synthase (DMRL synthase) (LS) (Lumazine synthase) (EC 2.5.1.78)                                            | 92.42023 | 3.038154 | 0.269962 | 7.549788 | 4.36E-14 | 1.16E-12 | Cluster 6 |
| SAOUHSC_02573  | YP_501034.1 | 3921570 |       | Na <sup>+</sup> /H <sup>+</sup> antiporter NhaC                                                                                           | 199.3228 | 2.257298 | 0.166905 | 7.533026 | 4.96E-14 | 1.31E-12 | Cluster 6 |
| SAOUHSC_00420  | YP_499005.1 | 3920577 |       | Transporter                                                                                                                               | 187.1314 | 3.253123 | 0.29935  | 7.526709 | 5.2E-14  | 1.36E-12 | Cluster 5 |
| SAOUHSC_02709  | YP_501171.1 | 3919728 | hlcC  | Gamma-hemolysin component C (Leukocidin s subunit)                                                                                        | 177.2058 | -4.02565 | 0.403129 | -7.50542 | 6.12E-14 | 1.58E-12 | Cluster 1 |
| SAOUHSC_02006  | YP_500503.1 | 3921886 |       | Uncharacterized protein                                                                                                                   | 416.1939 | -2.05415 | 0.140788 | -7.48749 | 7.02E-14 | 1.78E-12 | Cluster 1 |
| SAOUHSC_02770  | YP_501229.1 | 3921425 |       | Uncharacterized protein                                                                                                                   | 26.3034  | 3.862765 | 0.382309 | 7.488094 | 6.99E-14 | 1.78E-12 | Cluster 5 |
| SAOUHSC_02599  | YP_501060.1 | 3921594 |       | Hex regulon repressor, putative                                                                                                           | 28.54074 | 3.470416 | 0.330166 | 7.482352 | 7.3E-14  | 1.83E-12 | Cluster 6 |
| SAOUHSC_T00026 |             | 3921152 |       |                                                                                                                                           | 98.20923 | 3.181562 | 0.292479 | 7.458856 | 8.73E-14 | 2.17E-12 | Cluster 5 |
| SAOUHSC_02541  | YP_501004.1 | 3921130 |       | Molybdopterin-guanine dinucleotide biosynthesis protein MobB                                                                              | 141.2267 | -2.31935 | 0.177754 | -7.42234 | 1.15E-13 | 2.83E-12 | Cluster 1 |
| SAOUHSC_00329  | YP_498918.1 | 3919594 | tatA  | Sec-independent protein translocase protein TatA                                                                                          | 56.98184 | 3.059576 | 0.278999 | 7.382012 | 1.56E-13 | 3.8E-12  | Cluster 6 |
| SAOUHSC_01222  | YP_499758.1 | 3920250 | topA  | DNA topoisomerase 1 (EC 5.6.2.2) (DNA topoisomerase I) (Omega-protein) (Relaxing enzyme) (Swivelase) (Untwisting enzyme)                  | 610.9216 | 3.03806  | 0.277338 | 7.348654 | 2E-13    | 4.83E-12 | Cluster 5 |
| SAOUHSC_03047  | YP_501493.1 | 3921311 |       | Uncharacterized protein                                                                                                                   | 33.60685 | -4.31494 | 0.453864 | -7.30381 | 2.8E-13  | 6.69E-12 | Cluster 1 |
| SAOUHSC_01615  | YP_500130.1 | 3920031 |       | DNA repair protein RecN (Recombination protein N)                                                                                         | 450.9667 | -1.89527 | 0.124234 | -7.20631 | 5.75E-13 | 1.36E-11 | Cluster 1 |
| SAOUHSC_00019  | YP_498625.1 | 3919190 | purA  | Adenylosuccinate synthetase (AMPSase) (AdSS) (EC 6.3.4.4) (IMP--aspartate ligase)                                                         | 149.2971 | 2.653474 | 0.230866 | 7.162037 | 7.95E-13 | 1.86E-11 | Cluster 6 |
| SAOUHSC_00367  | YP_498956.1 | 3919786 |       | Uncharacterized protein                                                                                                                   | 345.0306 | -2.0267  | 0.144302 | -7.11495 | 1.12E-12 | 2.6E-11  | Cluster 1 |
| SAOUHSC_00317  | YP_498907.1 | 3919544 |       | Glycerol-3-phosphate transporter                                                                                                          | 150.8176 | 3.115128 | 0.298119 | 7.094911 | 1.29E-12 | 2.98E-11 | Cluster 6 |
| SAOUHSC_00975  | YP_499528.1 | 3920120 |       | Uncharacterized protein                                                                                                                   | 41.3498  | 3.541372 | 0.35911  | 7.076865 | 1.47E-12 | 3.37E-11 | Cluster 6 |
| SAOUHSC_T00045 |             | 3921034 |       |                                                                                                                                           | 84.24058 | 3.342979 | 0.333904 | 7.016934 | 2.27E-12 | 5.13E-11 | Cluster 5 |
| SAOUHSC_02542  | YP_501005.1 | 3921131 |       | Molybdopterin molybdenumtransferase (EC 2.10.1.1)                                                                                         | 219.4669 | -2.3306  | 0.189664 | -7.01557 | 2.29E-12 | 5.14E-11 | Cluster 1 |
| SAOUHSC_02909  | YP_501362.1 | 3921361 |       | Dihydroorotate dehydrogenase (quinone) (EC 1.3.5.2)                                                                                       | 123.9519 | -2.28343 | 0.183717 | -6.98592 | 2.83E-12 | 6.29E-11 | Cluster 1 |
| SAOUHSC_02855  | YP_501311.1 | 3921527 |       | LysM domain protein (EC 3.5.1.28)                                                                                                         | 56.18043 | 4.527356 | 0.506451 | 6.964854 | 3.29E-12 | 7.24E-11 | Cluster 6 |
| SAOUHSC_T00050 |             | 3921039 |       |                                                                                                                                           | 7.528816 | 6.173333 | 0.744765 | 6.946261 | 3.75E-12 | 8.19E-11 | Cluster 6 |
| SAOUHSC_02595  | YP_501057.1 | 3921591 |       | Uncharacterized protein                                                                                                                   | 148.3689 | 4.374359 | 0.487451 | 6.922454 | 4.44E-12 | 9.61E-11 | Cluster 6 |
| SAOUHSC_02744  | YP_501205.1 | 3921618 |       | Amino acid ABC transporter, ATP-binding protein, putative                                                                                 | 106.085  | -3.02915 | 0.295863 | -6.85841 | 6.96E-12 | 1.5E-10  | Cluster 1 |
| SAOUHSC_02930  | YP_501383.1 | 3921637 |       | Uncharacterized protein                                                                                                                   | 92.40008 | -2.38893 | 0.203978 | -6.80923 | 9.81E-12 | 2.09E-10 | Cluster 1 |
| SAOUHSC_01043  | YP_499592.1 | 3919891 |       | Dihydropyridyl dehydrogenase (EC 1.8.1.4)                                                                                                 | 2962.782 | -2.18721 | 0.174511 | -6.80305 | 1.02E-11 | 2.16E-10 | Cluster 1 |
| SAOUHSC_02877  | YP_501332.1 | 3921548 | crtN  | 4,4'-diapophytoene desaturase (4,4'-diaponeurosporene-forming) (EC 1.3.8.-) (Dehydrosqualene desaturase)                                  | 339.0115 | -2.24633 | 0.183255 | -6.80108 | 1.04E-11 | 2.17E-10 | Cluster 1 |
| SAOUHSC_03046  | YP_501492.1 | 3921310 |       | Helix-turn-helix domain protein                                                                                                           | 48.04547 | -3.21144 | 0.326306 | -6.77721 | 1.23E-11 | 2.54E-10 | Cluster 1 |
| SAOUHSC_00769  | YP_499326.1 | 3919060 | secA1 | Protein translocase subunit SecA 1                                                                                                        | 1665.172 | -1.84706 | 0.125064 | -6.77298 | 1.26E-11 | 2.6E-10  | Cluster 1 |
| SAOUHSC_T00060 |             | 3921068 |       |                                                                                                                                           | 14.71875 | 3.975746 | 0.441428 | 6.741178 | 1.57E-11 | 3.21E-10 | Cluster 5 |
| SAOUHSC_T0007  |             | 3921326 |       |                                                                                                                                           | 55.89781 | 3.253097 | 0.338154 | 6.662942 | 2.68E-11 | 5.44E-10 | Cluster 5 |
| SAOUHSC_00203  | YP_498800.1 | 3920359 |       | Uncharacterized protein                                                                                                                   | 44.86127 | -3.03299 | 0.30645  | -6.63399 | 3.27E-11 | 6.57E-10 | Cluster 1 |
| SAOUHSC_01058  | YP_499605.1 | 3921721 |       | GTP-binding protein TypA, putative                                                                                                        | 375.8979 | 3.117104 | 0.319427 | 6.627818 | 3.41E-11 | 6.8E-10  | Cluster 5 |
| SAOUHSC_00100  | YP_498700.1 | 3919809 | deoC  | Deoxyribose-phosphate aldolase (DERA) (EC 4.1.2.4) (2-deoxy-D-ribose 5-phosphate aldolase) (Phosphodeoxyriboaldolase) (Deoxyriboaldolase) | 381.4704 | -2.00024 | 0.151864 | -6.58637 | 4.51E-11 | 8.92E-10 | Cluster 1 |
| SAOUHSC_T00014 |             | 3921333 |       |                                                                                                                                           | 66.79372 | 3.158929 | 0.329494 | 6.552252 | 5.67E-11 | 1.11E-09 | Cluster 5 |
| SAOUHSC_T00024 |             | 3921150 |       |                                                                                                                                           | 73.98496 | 3.021086 | 0.310128 | 6.516933 | 7.18E-11 | 1.4E-09  | Cluster 5 |
| SAOUHSC_T00043 |             | 3921032 |       |                                                                                                                                           | 40.74094 | 3.015228 | 0.309601 | 6.509106 | 7.56E-11 | 1.46E-09 | Cluster 5 |
| SAOUHSC_00281  | YP_498873.1 | 3918965 |       | Uncharacterized protein                                                                                                                   | 60.643   | -2.86349 | 0.287753 | -6.47601 | 9.42E-11 | 1.81E-09 | Cluster 1 |
| SAOUHSC_02891  | YP_501344.1 | 3921343 |       | Uncharacterized protein                                                                                                                   | 56.30797 | 2.810062 | 0.28001  | 6.464286 | 1.02E-10 | 1.94E-09 | Cluster 6 |
| SAOUHSC_T00059 |             | 3921067 |       |                                                                                                                                           | 14.12524 | 3.671278 | 0.41565  | 6.426746 | 1.3E-10  | 2.47E-09 | Cluster 5 |
| SAOUHSC_02611  | YP_501072.1 | 3921389 | lyrA  | Lysostaphin resistance protein A                                                                                                          | 203.5449 | 2.304774 | 0.204385 | 6.383915 | 1.73E-10 | 3.24E-09 | Cluster 6 |
| SAOUHSC_02768  | YP_501227.1 | 3921423 |       | Uncharacterized protein                                                                                                                   | 20.4983  | 3.807209 | 0.443002 | 6.336785 | 2.35E-10 | 4.37E-09 | Cluster 5 |
| SAOUHSC_00328  | YP_498917.1 | 3919593 | tatC  | Sec-independent protein translocase protein TatC                                                                                          | 80.76953 | 2.958348 | 0.309333 | 6.33087  | 2.44E-10 | 4.51E-09 | Cluster 6 |
| SAOUHSC_02587  | YP_501049.1 | 3921583 |       | Uncharacterized protein                                                                                                                   | 52.40302 | 2.631317 | 0.257724 | 6.3297   | 2.46E-10 | 4.51E-09 | Cluster 5 |
| SAOUHSC_01671  | YP_500182.1 | 3920083 |       | Diacylglycerol kinase, putative (EC 2.7.1.107)                                                                                            | 119.9807 | -2.28921 | 0.203766 | -6.32689 | 2.5E-10  | 4.56E-09 | Cluster 1 |
| SAOUHSC_02607  | YP_501068.1 | 3921385 | hutU  | Urocanate hydratase (Urocanase) (EC 4.2.1.49) (Imidazolonepropionate hydrolase)                                                           | 375.1239 | -3.46891 | 0.391081 | -6.31305 | 2.74E-10 | 4.95E-09 | Cluster 1 |
| SAOUHSC_02879  | YP_501333.1 | 3921549 | crtM  | 4,4'-diapophytoene synthase (DAP synthase) (EC 2.5.1.96) (C30 carotenoid synthase) (Dehydrosqualene synthase)                             | 193.0345 | -2.09665 | 0.175584 | -6.24572 | 4.22E-10 | 7.58E-09 | Cluster 1 |
| SAOUHSC_01978  | YP_500475.1 | 3920454 |       | UPF0754 membrane protein SAOUHSC_01978                                                                                                    | 111.0364 | 2.332065 | 0.218663 | 6.091863 | 1.12E-09 | 1.99E-08 | Cluster 6 |
| SAOUHSC_00888  | YP_499441.1 | 3921734 | mnhB1 | Na <sup>(+)</sup> /H <sup>(+)</sup> antiporter subunit B1 (Mnh complex subunit B1)                                                        | 359.091  | -2.00542 | 0.165944 | -6.05879 | 1.37E-09 | 2.43E-08 | Cluster 1 |
| SAOUHSC_02097  | YP_500588.1 | 3921169 |       | Uncharacterized protein                                                                                                                   | 428.9274 | 2.578982 | 0.262942 | 6.005047 | 1.91E-09 | 3.37E-08 | Cluster 6 |
| SAOUHSC_00351  | YP_498940.1 | 3921824 |       | Uncharacterized protein                                                                                                                   | 27.31579 | 2.486454 | 0.249856 | 5.949243 | 2.69E-09 | 4.68E-08 | Cluster 6 |
| SAOUHSC_02812  | YP_501270.1 | 3921251 |       | Uncharacterized protein                                                                                                                   | 393.002  | 2.099357 | 0.184758 | 5.950258 | 2.68E-09 | 4.68E-08 | Cluster 5 |

|                |             |         |                                                                                                                                                          |          |          |          |          |          |          |           |
|----------------|-------------|---------|----------------------------------------------------------------------------------------------------------------------------------------------------------|----------|----------|----------|----------|----------|----------|-----------|
| SAOUHSC_00535  | YP_499107.1 | 3920815 | Uncharacterized epimerase/dehydratase<br>SAOUHSC_00535                                                                                                   | 601.6013 | -2.70053 | 0.285962 | -5.94672 | 2.74E-09 | 4.72E-08 | Cluster 3 |
| SAOUHSC_01425  | YP_499951.1 | 3920656 | Uncharacterized protein                                                                                                                                  | 43.27902 | 2.388312 | 0.234704 | 5.915164 | 3.32E-09 | 5.68E-08 | Cluster 6 |
| SAOUHSC_01156  | YP_499697.1 | 3920715 | Uncharacterized protein                                                                                                                                  | 208.6076 | 1.99874  | 0.169097 | 5.906305 | 3.5E-09  | 5.95E-08 | Cluster 5 |
| SAOUHSC_01084  | YP_499629.1 | 3919245 | Uncharacterized protein                                                                                                                                  | 51.03169 | 3.973524 | 0.507018 | 5.864736 | 4.5E-09  | 7.6E-08  | Cluster 5 |
| SAOUHSC_00922  | YP_499475.1 | 3920809 | Uncharacterized protein                                                                                                                                  | 9.879163 | 3.675273 | 0.456747 | 5.857228 | 4.71E-09 | 7.9E-08  | Cluster 6 |
| SAOUHSC_T00019 |             | 3921338 |                                                                                                                                                          | 54.27865 | 2.876472 | 0.320697 | 5.851227 | 4.88E-09 | 8.13E-08 | Cluster 5 |
| SAOUHSC_00101  | YP_498701.1 | 3919810 | deoB<br>Phosphopentomutase (EC 5.4.2.7)<br>(Phosphodeoxyribomutase)                                                                                      | 723.7071 | -2.01032 | 0.173064 | -5.83782 | 5.29E-09 | 8.76E-08 | Cluster 1 |
| SAOUHSC_00964  | YP_499517.1 | 3920675 | Uncharacterized protein                                                                                                                                  | 187.2078 | 2.057912 | 0.181251 | 5.836735 | 5.32E-09 | 8.76E-08 | Cluster 5 |
| SAOUHSC_01354  | YP_499882.1 | 3920060 | Sodium:alanine symporter family protein,<br>putative                                                                                                     | 400.0455 | 1.767362 | 0.131609 | 5.830619 | 5.52E-09 | 9.03E-08 | Cluster 6 |
| SAOUHSC_00995  | YP_499547.1 | 3920395 | Putative acetyltransferase SAOUHSC_00995 (EC<br>2.3.1.-) (GCN5-related N-acetyltransferase)<br>(GNAT)                                                    | 29.94159 | 2.583629 | 0.271834 | 5.825723 | 5.69E-09 | 9.24E-08 | Cluster 6 |
| SAOUHSC_01667  | YP_500178.1 | 3920079 | recO<br>DNA repair protein RecO (Recombination<br>protein O)                                                                                             | 192.9427 | -1.97314 | 0.167324 | -5.81593 | 6.03E-09 | 9.73E-08 | Cluster 1 |
| SAOUHSC_02889  | YP_501342.1 | 3921341 | Uncharacterized protein                                                                                                                                  | 16.05835 | 4.108609 | 0.534655 | 5.814236 | 6.09E-09 | 9.77E-08 | Cluster 6 |
| SAOUHSC_00863  | YP_499416.1 | 3918993 | Uncharacterized protein                                                                                                                                  | 21.19809 | 2.758788 | 0.303306 | 5.79873  | 6.68E-09 | 1.06E-07 | Cluster 5 |
| SAOUHSC_00548  | YP_499120.1 | 3920827 | Uncharacterized protein                                                                                                                                  | 368.1979 | -2.10094 | 0.191557 | -5.74732 | 9.07E-09 | 1.44E-07 | Cluster 1 |
| SAOUHSC_02631  | YP_501092.1 | 3921408 | Uncharacterized protein                                                                                                                                  | 64.64795 | 3.019588 | 0.35166  | 5.743021 | 9.3E-09  | 1.46E-07 | Cluster 5 |
| SAOUHSC_01085  | YP_499630.1 | 3919246 | conserved hypothetical protein                                                                                                                           | 35.98297 | 3.632276 | 0.458505 | 5.740995 | 9.41E-09 | 1.47E-07 | Cluster 6 |
| SAOUHSC_02883  | YP_501337.1 | 3921553 | ssaA<br>Staphylococcal secretory antigen SsaA                                                                                                            | 82.82713 | 4.890637 | 0.678773 | 5.73187  | 9.93E-09 | 1.54E-07 | Cluster 6 |
| SAOUHSC_01832  | YP_500338.1 | 3921782 | Uncharacterized protein                                                                                                                                  | 681.6078 | 3.779674 | 0.485351 | 5.727136 | 1.02E-08 | 1.58E-07 | Cluster 6 |
| SAOUHSC_02982  | YP_501431.1 | 3921464 | sasF<br>Surface protein F                                                                                                                                | 461.228  | -1.88351 | 0.154809 | -5.70711 | 1.15E-08 | 1.76E-07 | Cluster 1 |
| SAOUHSC_00884  | YP_499437.1 | 3919231 | mnhF1<br>Na(+)/H(+) antiporter subunit F1 (Mnh complex<br>subunit F1)                                                                                    | 255.9598 | -2.06248 | 0.186472 | -5.69782 | 1.21E-08 | 1.85E-07 | Cluster 1 |
| SAOUHSC_02622  | YP_501083.1 | 3921399 | Sodium/glutamate symporter                                                                                                                               | 110.8752 | 3.15775  | 0.381634 | 5.653973 | 1.57E-08 | 2.38E-07 | Cluster 6 |
| SAOUHSC_01389  | YP_499916.1 | 3920680 | pstS<br>Phosphate-binding protein PstS (PBP)                                                                                                             | 42.29842 | 4.309627 | 0.58979  | 5.611531 | 2.01E-08 | 3.02E-07 | Cluster 4 |
| SAOUHSC_01971  | YP_500468.1 | 3920447 | Uncharacterized protein                                                                                                                                  | 29.86994 | 2.528679 | 0.272506 | 5.609709 | 2.03E-08 | 3.04E-07 | Cluster 6 |
| SAOUHSC_02689  | YP_501151.1 | 3919708 | Uncharacterized protein                                                                                                                                  | 18.92693 | 4.043908 | 0.543167 | 5.603997 | 2.09E-08 | 3.12E-07 | Cluster 6 |
| SAOUHSC_00885  | YP_499438.1 | 3919232 | mnhE1<br>Na(+)/H(+) antiporter subunit E1 (Mnh complex<br>subunit E1)                                                                                    | 399.9646 | -1.98586 | 0.176079 | -5.59898 | 2.16E-08 | 3.17E-07 | Cluster 1 |
| SAOUHSC_01985  | YP_500482.1 | 3920461 | Uncharacterized protein                                                                                                                                  | 21.25439 | 2.693158 | 0.302369 | 5.599648 | 2.15E-08 | 3.17E-07 | Cluster 6 |
| SAOUHSC_02265  | YP_500746.1 | 3919140 | Accessory gene regulator protein A                                                                                                                       | 1575.905 | -2.63318 | 0.291736 | -5.59817 | 2.17E-08 | 3.17E-07 | Cluster 1 |
| SAOUHSC_00949  | YP_499502.1 | 3920660 | Uncharacterized protein                                                                                                                                  | 451.5949 | 3.834348 | 0.507183 | 5.588413 | 2.29E-08 | 3.34E-07 | Cluster 6 |
| SAOUHSC_01164  | YP_499704.1 | 3920916 | pyrR<br>Bifunctional protein PyrR [Includes: Pyrimidine<br>operon regulatory protein; Uracil<br>phosphoribosyltransferase (UPRTase) (EC<br>2.4.2.9)]     | 139.7772 | -2.36338 | 0.244911 | -5.56684 | 2.59E-08 | 3.76E-07 | Cluster 1 |
| SAOUHSC_01833  | YP_500339.1 | 3921783 | D-3-phosphoglycerate dehydrogenase (EC<br>1.1.1.95)                                                                                                      | 939.8025 | 3.839045 | 0.5103   | 5.563486 | 2.64E-08 | 3.81E-07 | Cluster 6 |
| SAOUHSC_00555  | YP_499127.1 | 3920600 | Hydrolase, haloacid dehalogenase-like                                                                                                                    | 41.22971 | 2.387104 | 0.249764 | 5.553656 | 2.8E-08  | 4.01E-07 | Cluster 6 |
| SAOUHSC_00060  | YP_498664.1 | 3919091 | Uncharacterized protein                                                                                                                                  | 259.1687 | 2.532827 | 0.27659  | 5.541872 | 2.99E-08 | 4.26E-07 | Cluster 5 |
| SAOUHSC_02769  | YP_501228.1 | 3921424 | Uncharacterized protein                                                                                                                                  | 15.89639 | 3.901013 | 0.52358  | 5.540729 | 3.01E-08 | 4.26E-07 | Cluster 5 |
| SAOUHSC_T00036 |             | 3921162 |                                                                                                                                                          | 59.41984 | 2.584355 | 0.287232 | 5.515947 | 3.47E-08 | 4.88E-07 | Cluster 5 |
| SAOUHSC_01668  | YP_500179.2 | 3920080 | era<br>GTPase Era                                                                                                                                        | 260.2635 | -2.24243 | 0.225456 | -5.51077 | 3.57E-08 | 5E-07    | Cluster 1 |
| SAOUHSC_01634  | YP_500147.1 | 3919971 | gcvT<br>Aminomethyltransferase (EC 2.1.2.10) (Glycine<br>cleavage system T protein)                                                                      | 165.9732 | 2.923183 | 0.349566 | 5.501634 | 3.76E-08 | 5.24E-07 | Cluster 6 |
| SAOUHSC_02241  | YP_500725.1 | 3919663 | Uncharacterized leukocidin-like protein 1                                                                                                                | 218.8248 | -3.88152 | 0.527399 | -5.46364 | 4.66E-08 | 6.46E-07 | Cluster 1 |
| SAOUHSC_01121  | YP_499665.1 | 3920722 | alpha-hemolysin precursor                                                                                                                                | 497.7348 | -2.84099 | 0.337646 | -5.45243 | 4.97E-08 | 6.84E-07 | Cluster 3 |
| SAOUHSC_T00034 |             | 3921160 |                                                                                                                                                          | 11.079   | 4.640936 | 0.669459 | 5.438622 | 5.37E-08 | 7.35E-07 | Cluster 5 |
| SAOUHSC_02737  | YP_501198.1 | 3921611 | Epimerase/dehydratase, putative                                                                                                                          | 102.4015 | 1.959593 | 0.176612 | 5.433325 | 5.53E-08 | 7.54E-07 | Cluster 5 |
| SAOUHSC_00698  | YP_499257.1 | 3921002 | Uncharacterized protein                                                                                                                                  | 206.7331 | -1.75742 | 0.140432 | -5.39346 | 6.91E-08 | 9.37E-07 | Cluster 1 |
| SAOUHSC_00064  | YP_498667.1 | 3919094 | norG<br>HTH-type transcriptional regulator NorG                                                                                                          | 9.753038 | 3.214639 | 0.410994 | 5.388495 | 7.11E-08 | 9.58E-07 | Cluster 6 |
| SAOUHSC_01980  | YP_500477.1 | 3920456 | DNA-binding response regulator, putative                                                                                                                 | 43.23544 | 2.170489 | 0.217309 | 5.386285 | 7.19E-08 | 9.64E-07 | Cluster 5 |
| SAOUHSC_02294  | YP_500773.1 | 3919166 | Uncharacterized protein                                                                                                                                  | 10.55147 | 4.826092 | 0.710683 | 5.383683 | 7.3E-08  | 9.73E-07 | Cluster 5 |
| SAOUHSC_00113  | YP_498713.1 | 3919822 | Aldehyde-alcohol dehydrogenase                                                                                                                           | 366.8791 | -3.76883 | 0.515619 | -5.36991 | 7.88E-08 | 1.05E-06 | Cluster 1 |
| SAOUHSC_02547  | YP_501010.1 | 3921136 | Molybdenum transport system permease                                                                                                                     | 232.9604 | -2.42873 | 0.266966 | -5.35173 | 8.71E-08 | 1.15E-06 | Cluster 1 |
| SAOUHSC_02328  | YP_500807.1 | 3920953 | thiE<br>Thiamine-phosphate synthase (TP synthase)<br>(TPS) (EC 2.5.1.3) (Thiamine-phosphate<br>pyrophosphorylase) (TMP pyrophosphorylase)<br>(TMP-PPase) | 48.0557  | -3.83579 | 0.534803 | -5.3025  | 1.14E-07 | 1.5E-06  | Cluster 1 |
| SAOUHSC_00202  | YP_498799.1 | 3920358 | Uncharacterized protein                                                                                                                                  | 24.90117 | -2.89012 | 0.357116 | -5.29272 | 1.21E-07 | 1.57E-06 | Cluster 1 |
| SAOUHSC_02785  | YP_501245.1 | 3921440 | Uncharacterized protein                                                                                                                                  | 79.11951 | -2.17277 | 0.223168 | -5.25511 | 1.48E-07 | 1.92E-06 | Cluster 1 |
| SAOUHSC_02985  | YP_501434.1 | 3921467 | secA2<br>Protein translocase subunit SecA 2                                                                                                              | 463.8983 | -2.3609  | 0.260861 | -5.21694 | 1.82E-07 | 2.35E-06 | Cluster 1 |
| SAOUHSC_02424  | YP_500895.1 | 3919634 | Uncharacterized protein                                                                                                                                  | 228.5306 | -1.92031 | 0.176746 | -5.20696 | 1.92E-07 | 2.47E-06 | Cluster 1 |
| SAOUHSC_00401  | YP_498988.1 | 3919136 | Uncharacterized protein                                                                                                                                  | 22.33275 | 3.226175 | 0.434887 | 5.118975 | 3.07E-07 | 3.93E-06 | Cluster 6 |
| SAOUHSC_02264  | YP_500745.1 | 3919139 | Accessory gene regulator protein C                                                                                                                       | 1509.631 | -2.58855 | 0.310406 | -5.11764 | 3.09E-07 | 3.94E-06 | Cluster 1 |

|                |             |         |       |                                                                                                                                                                                                                                                                                                                                                     |          |          |          |          |          |          |           |
|----------------|-------------|---------|-------|-----------------------------------------------------------------------------------------------------------------------------------------------------------------------------------------------------------------------------------------------------------------------------------------------------------------------------------------------------|----------|----------|----------|----------|----------|----------|-----------|
| SAOUHSC_02984  | YP_501433.1 | 3921466 | gtfA  | UDP-N-acetylglucosamine--peptide N-acetylglucosaminyltransferase GtfA subunit (EC 2.4.1.-) (Glycosyltransferase GtfA)                                                                                                                                                                                                                               | 444.1007 | -2.10284 | 0.21623  | -5.10033 | 3.39E-07 | 4.3E-06  | Cluster 1 |
| SAOUHSC_00899  | YP_499452.1 | 3921745 | argG  | Argininosuccinate synthase (EC 6.3.4.5) (Citrulline--aspartate ligase)                                                                                                                                                                                                                                                                              | 475.9187 | 2.116959 | 0.219343 | 5.092303 | 3.54E-07 | 4.46E-06 | Cluster 4 |
| SAOUHSC_01424  | YP_499950.1 | 3920655 | murG  | UDP-N-acetylglucosamine--N-acetylmuramyl-(pentapeptide) pyrophosphoryl-undecaprenol N-acetylglucosamine transferase (EC 2.4.1.227) (Undecaprenyl-PP-MurNAc-pentapeptide-UDPGlcNAc GlcNAc transferase)                                                                                                                                               | 140.8253 | 2.028289 | 0.202189 | 5.085771 | 3.66E-07 | 4.59E-06 | Cluster 6 |
| SAOUHSC_00289  | YP_498879.1 | 3918970 |       | Uncharacterized protein                                                                                                                                                                                                                                                                                                                             | 30.94812 | 4.221287 | 0.634643 | 5.075748 | 3.86E-07 | 4.82E-06 | Cluster 6 |
| SAOUHSC_01361  | YP_499888.1 | 3920066 | mrsR  | Regulatory protein MsrR                                                                                                                                                                                                                                                                                                                             | 154.6053 | 2.285079 | 0.254061 | 5.058157 | 4.23E-07 | 5.26E-06 | Cluster 5 |
| SAOUHSC_02069  | YP_500562.1 | 3919756 |       | Phi PV83 orf 20-like protein                                                                                                                                                                                                                                                                                                                        | 13.03755 | 5.620444 | 0.920404 | 5.020018 | 5.17E-07 | 6.39E-06 | Cluster 5 |
| SAOUHSC_02255  | YP_500737.1 | 3919675 | groES | 10 kDa chaperonin Cpn10 GroES forms homoheptameric ring binds to one or both ends of the GroEL double barrel in the presence of adenine nucleotides capping it folding of unfolded substrates initiates in a GroEL-substrate bound and capped by GroES release of the folded substrate is dependent on ATP binding and hydrolysis in the trans ring | 1099.208 | 3.277078 | 0.457839 | 4.973531 | 6.57E-07 | 8.09E-06 | Cluster 4 |
| SAOUHSC_T00044 |             | 3921033 |       |                                                                                                                                                                                                                                                                                                                                                     | 17.7156  | 3.551735 | 0.513529 | 4.969021 | 6.73E-07 | 8.24E-06 | Cluster 6 |
| SAOUHSC_01633  | YP_500146.1 | 3919970 | gcvPA | Probable glycine dehydrogenase (decarboxylating) subunit 1 (EC 1.4.4.2) (Glycine cleavage system P-protein subunit 1) (Glycine decarboxylase subunit 1) (Glycine dehydrogenase (aminomethyl-transferring) subunit 1)                                                                                                                                | 268.7589 | 2.103451 | 0.223898 | 4.928355 | 8.29E-07 | 1.01E-05 | Cluster 6 |
| SAOUHSC_00887  | YP_499440.1 | 3919234 | mnhC1 | Na(+)/H(+) antiporter subunit C1 (Mnh complex subunit C1)                                                                                                                                                                                                                                                                                           | 327.4822 | -1.9769  | 0.198959 | -4.91008 | 9.1E-07  | 1.1E-05  | Cluster 1 |
| SAOUHSC_01088  | YP_499633.1 | 3919249 | srtB  | Sortase B (EC 3.4.22.71)                                                                                                                                                                                                                                                                                                                            | 18.4419  | 3.506308 | 0.510505 | 4.909471 | 9.13E-07 | 1.1E-05  | Cluster 5 |
| SAOUHSC_02520  | YP_500985.1 | 3921111 |       | Sugar transporter, putative                                                                                                                                                                                                                                                                                                                         | 162.3337 | 1.718792 | 0.146565 | 4.904259 | 9.38E-07 | 1.13E-05 | Cluster 6 |
| SAOUHSC_01650  | YP_500162.1 | 3920102 |       | 5-formyltetrahydrofolate cyclo-ligase (EC 6.3.3.2)                                                                                                                                                                                                                                                                                                  | 102.2419 | -2.21451 | 0.248251 | -4.89228 | 9.97E-07 | 1.19E-05 | Cluster 1 |
| SAOUHSC_03015  | YP_501464.1 | 3921496 | hisZ  | ATP phosphoribosyltransferase regulatory subunit                                                                                                                                                                                                                                                                                                    | 97.88658 | 3.200668 | 0.454427 | 4.842735 | 1.28E-06 | 1.52E-05 | Cluster 4 |
| SAOUHSC_00434  | YP_499017.1 | 3919106 |       | Transcriptional regulator, lysR family, putative                                                                                                                                                                                                                                                                                                    | 27.48046 | 2.38387  | 0.289953 | 4.772744 | 1.82E-06 | 2.15E-05 | Cluster 5 |
| SAOUHSC_01689  | YP_500199.1 | 3921801 | rpsT  | 30S ribosomal protein S20                                                                                                                                                                                                                                                                                                                           | 114.0437 | 2.021952 | 0.214563 | 4.76294  | 1.91E-06 | 2.25E-05 | Cluster 5 |
| SAOUHSC_01082  | YP_499628.1 | 3919244 |       | conserved hypothetical protein                                                                                                                                                                                                                                                                                                                      | 36.0948  | 3.456652 | 0.519682 | 4.727227 | 2.28E-06 | 2.66E-05 | Cluster 5 |
| SAOUHSC_T00052 |             | 3921041 |       |                                                                                                                                                                                                                                                                                                                                                     | 127.1458 | 2.781147 | 0.376813 | 4.726873 | 2.28E-06 | 2.66E-05 | Cluster 5 |
| SAOUHSC_T0004  |             | 3921323 |       |                                                                                                                                                                                                                                                                                                                                                     | 29.02166 | 3.118392 | 0.449407 | 4.713749 | 2.43E-06 | 2.83E-05 | Cluster 5 |
| SAOUHSC_01081  | YP_499627.1 | 3919243 |       | conserved hypothetical protein                                                                                                                                                                                                                                                                                                                      | 77.74226 | 3.604501 | 0.557556 | 4.671282 | 2.99E-06 | 3.46E-05 | Cluster 6 |
| SAOUHSC_R0004  |             | 3921504 |       |                                                                                                                                                                                                                                                                                                                                                     | 55386.14 | 3.515172 | 0.539545 | 4.661649 | 3.14E-06 | 3.6E-05  | Cluster 4 |
| SAOUHSC_02540  | YP_501003.1 | 3921129 |       | Molybdopterin converting factor moa, putative                                                                                                                                                                                                                                                                                                       | 155.1243 | -2.11442 | 0.239073 | -4.66143 | 3.14E-06 | 3.6E-05  | Cluster 1 |
| SAOUHSC_02011  | YP_500508.1 | 3920465 | recX  | Regulatory protein RecX                                                                                                                                                                                                                                                                                                                             | 47.59751 | 1.994785 | 0.213468 | 4.66012  | 3.16E-06 | 3.61E-05 | Cluster 6 |
| SAOUHSC_02243  | YP_500726.1 | 3919664 |       | Uncharacterized leukocidin-like protein 2                                                                                                                                                                                                                                                                                                           | 161.0216 | -3.3662  | 0.509162 | -4.64725 | 3.36E-06 | 3.82E-05 | Cluster 1 |
| SAOUHSC_00158  | YP_498757.1 | 3919866 |       | PTS system EIIBC component SAOUHSC_00158 [Includes: Phosphotransferase enzyme IIB component (EC 2.7.1.-) (PTS system EIIB component); Permease IIC component (PTS system EIIC component)]                                                                                                                                                           | 182.4253 | -2.10899 | 0.241509 | -4.59194 | 4.39E-06 | 4.97E-05 | Cluster 1 |
| SAOUHSC_00905  | YP_499458.1 | 3921751 | addA  | ATP-dependent helicase/nuclease subunit A (EC 3.1.-.-) (EC 3.6.4.12) (ATP-dependent helicase/nuclease AddA)                                                                                                                                                                                                                                         | 567.3458 | -1.56557 | 0.123437 | -4.58182 | 4.61E-06 | 5.19E-05 | Cluster 1 |
| SAOUHSC_02135  | YP_500625.1 | 3921832 |       | Uncharacterized protein                                                                                                                                                                                                                                                                                                                             | 135.8131 | -2.13514 | 0.24784  | -4.58011 | 4.65E-06 | 5.21E-05 | Cluster 1 |
| SAOUHSC_01504  | YP_500022.1 | 3919047 |       | Ferredoxin, putative                                                                                                                                                                                                                                                                                                                                | 163.4734 | 3.52836  | 0.55377  | 4.565723 | 4.98E-06 | 5.56E-05 | Cluster 5 |
| SAOUHSC_01319  | YP_499849.1 | 3920145 |       | Aspartokinase (EC 2.7.2.4)                                                                                                                                                                                                                                                                                                                          | 285.625  | 1.574545 | 0.126313 | 4.548583 | 5.4E-06  | 6E-05    | Cluster 6 |
| SAOUHSC_01330  | YP_499860.1 | 3920195 | guaC  | GMP reductase (EC 1.7.1.7) (Guanosine 5'-monophosphate oxidoreductase) (Guanosine monophosphate reductase)                                                                                                                                                                                                                                          | 102.6157 | 3.08843  | 0.461332 | 4.52696  | 5.98E-06 | 6.62E-05 | Cluster 5 |
| SAOUHSC_R0001  |             | 3921501 |       |                                                                                                                                                                                                                                                                                                                                                     | 49146.55 | 3.485672 | 0.549627 | 4.522469 | 6.11E-06 | 6.73E-05 | Cluster 4 |
| SAOUHSC_02574  | YP_501035.1 | 3921571 |       | Uncharacterized protein                                                                                                                                                                                                                                                                                                                             | 162.3062 | 2.202316 | 0.266593 | 4.509932 | 6.48E-06 | 7.11E-05 | Cluster 6 |
| SAOUHSC_01853  | YP_500357.1 | 3920531 |       | Uncharacterized protein                                                                                                                                                                                                                                                                                                                             | 6.149828 | 3.708832 | 0.601297 | 4.504979 | 6.64E-06 | 7.25E-05 | Cluster 6 |
| SAOUHSC_T00041 |             | 3921030 |       |                                                                                                                                                                                                                                                                                                                                                     | 102.1107 | 2.766926 | 0.394111 | 4.483319 | 7.35E-06 | 7.99E-05 | Cluster 5 |
| SAOUHSC_02881  | YP_501335.1 | 3921551 |       | conserved hypothetical protein                                                                                                                                                                                                                                                                                                                      | 312.1886 | -2.01787 | 0.227374 | -4.47661 | 7.58E-06 | 8.21E-05 | Cluster 2 |
| SAOUHSC_01861  | YP_500365.1 | 3920539 |       | Uncharacterized protein                                                                                                                                                                                                                                                                                                                             | 301.6388 | -1.65367 | 0.146762 | -4.45396 | 8.43E-06 | 9.09E-05 | Cluster 3 |
| SAOUHSC_02924  | YP_501377.1 | 3921375 |       | Uncharacterized protein                                                                                                                                                                                                                                                                                                                             | 456.9276 | 3.277536 | 0.511944 | 4.448803 | 8.64E-06 | 9.27E-05 | Cluster 6 |
| SAOUHSC_02465  | YP_500933.1 | 3919028 |       | Uncharacterized hydrolase SAOUHSC_02465 (EC 3.-.-.-)                                                                                                                                                                                                                                                                                                | 50.17264 | -2.10021 | 0.247489 | -4.44549 | 8.77E-06 | 9.38E-05 | Cluster 1 |
| SAOUHSC_02888  | YP_501341.1 | 3921557 |       | Uncharacterized protein                                                                                                                                                                                                                                                                                                                             | 516.0139 | 3.395316 | 0.53925  | 4.441936 | 8.92E-06 | 9.49E-05 | Cluster 6 |
| SAOUHSC_00913  | YP_499466.1 | 3920800 |       | Uncharacterized protein                                                                                                                                                                                                                                                                                                                             | 26.48186 | 3.827044 | 0.637285 | 4.436076 | 9.16E-06 | 9.71E-05 | Cluster 5 |
| SAOUHSC_01984  | YP_500481.1 | 3920460 |       | Uncharacterized protein                                                                                                                                                                                                                                                                                                                             | 37.27694 | 2.073608 | 0.242583 | 4.425739 | 9.61E-06 | 0.000101 | Cluster 6 |
| SAOUHSC_01009  | YP_499559.1 | 3920270 | purK  | N5-carboxyaminoimidazole ribonucleotide synthase (N5-CAIR synthase) (EC 6.3.4.18) (5-(carboxyamino)imidazole ribonucleotide synthetase)                                                                                                                                                                                                             | 75.80218 | 2.2514   | 0.284648 | 4.396307 | 1.1E-05  | 0.000115 | Cluster 5 |



|                |             |         |       |                                                                                                                                                                                                                                                                                   |          |          |          |          |          |          |           |
|----------------|-------------|---------|-------|-----------------------------------------------------------------------------------------------------------------------------------------------------------------------------------------------------------------------------------------------------------------------------------|----------|----------|----------|----------|----------|----------|-----------|
| SAOUHSC_01672  | YP_500183.1 | 3920084 | ybeY  | Endoribonuclease YbeY (EC 3.1.-.-)                                                                                                                                                                                                                                                | 167.8368 | -2.10563 | 0.251498 | -4.39617 | 1.1E-05  | 0.000115 | Cluster 1 |
| SAOUHSC_00075  | YP_498675.1 | 3919453 | sbnA  | N-(2-amino-2-carboxyethyl)-L-glutamate synthase (ACEGA synthase) (EC 2.5.1.140) (Staphyloferrin B biosynthesis protein SbnA)                                                                                                                                                      | 10.83604 | 3.605014 | 0.593004 | 4.392915 | 1.12E-05 | 0.000117 | Cluster 6 |
| SAOUHSC_00156  | YP_498755.1 | 3919864 |       | Uncharacterized protein                                                                                                                                                                                                                                                           | 102.0609 | -2.19034 | 0.271115 | -4.39053 | 1.13E-05 | 0.000117 | Cluster 1 |
| SAOUHSC_00500  | YP_499073.1 | 3920412 | pdxT  | Pyridoxal 5'-phosphate synthase subunit PdxT (EC 4.3.3.6) (Pdx2) (Pyridoxal 5'-phosphate synthase glutaminase subunit) (EC 3.5.1.2)                                                                                                                                               | 370.0935 | -1.72131 | 0.164509 | -4.38464 | 1.16E-05 | 0.00012  | Cluster 1 |
| SAOUHSC_T0002  |             | 3921518 |       |                                                                                                                                                                                                                                                                                   | 105.5966 | 2.587658 | 0.362294 | 4.382234 | 1.17E-05 | 0.000121 | Cluster 5 |
| SAOUHSC_R0002  |             | 3921502 |       |                                                                                                                                                                                                                                                                                   | 52568.76 | 3.388974 | 0.545607 | 4.378561 | 1.19E-05 | 0.000123 | Cluster 4 |
| SAOUHSC_01394  | YP_499921.1 | 3920684 |       | Aspartokinase (EC 2.7.2.4)                                                                                                                                                                                                                                                        | 1244.68  | 2.866636 | 0.427042 | 4.371082 | 1.24E-05 | 0.000126 | Cluster 4 |
| SAOUHSC_R0003  |             | 3921503 |       |                                                                                                                                                                                                                                                                                   | 49318.75 | 3.387452 | 0.54696  | 4.36495  | 1.27E-05 | 0.000129 | Cluster 4 |
| SAOUHSC_02432  | YP_500901.1 | 3919640 |       | Uncharacterized protein                                                                                                                                                                                                                                                           | 3.431409 | 3.781112 | 0.637934 | 4.359559 | 1.3E-05  | 0.000132 | Cluster 6 |
| SAOUHSC_R0005  |             | 3921505 |       |                                                                                                                                                                                                                                                                                   | 47135.17 | 3.396704 | 0.550489 | 4.35377  | 1.34E-05 | 0.000135 | Cluster 4 |
| SAOUHSC_01013  | YP_499563.1 | 3920274 | purL  | Phosphoribosylformylglycinamide synthase subunit PurL (FGAM synthase) (EC 6.3.5.3) (Formylglycinamide ribonucleotide amidotransferase subunit II) (FGAR amidotransferase II) (FGAR-AT II) (Glutamine amidotransferase PurL) (Phosphoribosylformylglycinamide synthase subunit II) | 148.2964 | 1.91198  | 0.209581 | 4.351441 | 1.35E-05 | 0.000136 | Cluster 6 |
| SAOUHSC_02464  | YP_500932.1 | 3919027 |       | Uncharacterized protein                                                                                                                                                                                                                                                           | 48.09426 | -2.06332 | 0.244946 | -4.34105 | 1.42E-05 | 0.000142 | Cluster 1 |
| SAOUHSC_01399  | YP_499926.1 | 3920689 |       | Uncharacterized hydrolase SAOUHSC_01399 (EC 3.-.-.-)                                                                                                                                                                                                                              | 534.9038 | 2.685814 | 0.388934 | 4.334444 | 1.46E-05 | 0.000146 | Cluster 4 |
| SAOUHSC_02422  | YP_500893.1 | 3919632 |       | Uncharacterized protein                                                                                                                                                                                                                                                           | 365.4118 | -1.63553 | 0.146957 | -4.32457 | 1.53E-05 | 0.000152 | Cluster 1 |
| SAOUHSC_02536  | YP_501000.1 | 3921126 | moaA  | GTP 3',8-cyclase (EC 4.1.99.22) (Molybdenum cofactor biosynthesis protein A)                                                                                                                                                                                                      | 335.0625 | -1.74058 | 0.171845 | -4.30957 | 1.64E-05 | 0.000162 | Cluster 1 |
| SAOUHSC_00209  | YP_498805.1 | 3920364 |       | PTS system, glucose-specific IIBC component, putative (EC 2.7.1.69)                                                                                                                                                                                                               | 114.7496 | -2.37264 | 0.320495 | -4.28288 | 1.84E-05 | 0.000182 | Cluster 1 |
| SAOUHSC_00868  | YP_499421.2 | 3918998 |       | Uncharacterized protein                                                                                                                                                                                                                                                           | 75.46246 | 1.812047 | 0.18985  | 4.277303 | 1.89E-05 | 0.000186 | Cluster 6 |
| SAOUHSC_03014  | YP_501463.1 | 3921495 | hisG  | ATP phosphoribosyltransferase (ATP-PRT) (ATP-PRTase) (EC 2.4.2.17)                                                                                                                                                                                                                | 54.6809  | 2.8581   | 0.437131 | 4.250667 | 2.13E-05 | 0.000209 | Cluster 4 |
| SAOUHSC_00051  | YP_498656.1 | 3919083 | plc   | 1-phosphatidylinositol phosphodiesterase (EC 4.6.1.13) (Phosphatidylinositol diacylglycerol-lyase) (Phosphatidylinositol-specific phospholipase C) (PI-PLC)                                                                                                                       | 23.11514 | -2.68748 | 0.399055 | -4.22868 | 2.35E-05 | 0.000229 | Cluster 1 |
| SAOUHSC_01893  | YP_500394.1 | 3920840 |       | Arsenical pump membrane protein                                                                                                                                                                                                                                                   | 80.27411 | 2.928534 | 0.456622 | 4.22348  | 2.41E-05 | 0.000234 | Cluster 5 |
| SAOUHSC_00694  | YP_499253.1 | 3920998 |       | conserved hypothetical protein                                                                                                                                                                                                                                                    | 1498.578 | 1.370749 | 0.087991 | 4.213463 | 2.51E-05 | 0.000242 | Cluster 5 |
| SAOUHSC_02266  | YP_500747.1 | 3919141 |       | Uncharacterized protein                                                                                                                                                                                                                                                           | 49.80378 | -2.37814 | 0.327071 | -4.21359 | 2.51E-05 | 0.000242 | Cluster 1 |
| SAOUHSC_00372  | YP_498961.1 | 3919791 | xpt   | Xanthine phosphoribosyltransferase (XPRase) (EC 2.4.2.22)                                                                                                                                                                                                                         | 201.0971 | 2.928174 | 0.457997 | 4.210015 | 2.55E-05 | 0.000245 | Cluster 6 |
| SAOUHSC_00867  | YP_499420.1 | 3918997 |       | Uncharacterized protein                                                                                                                                                                                                                                                           | 39.94071 | 1.859315 | 0.204197 | 4.208263 | 2.57E-05 | 0.000246 | Cluster 6 |
| SAOUHSC_01590  | YP_500105.1 | 3920006 |       | Uncharacterized protein                                                                                                                                                                                                                                                           | 28.3666  | 2.847886 | 0.440351 | 4.196398 | 2.71E-05 | 0.000258 | Cluster 5 |
| SAOUHSC_02647  | YP_501109.1 | 3921209 | mgo   | Probable malate:quinone oxidoreductase (EC 1.1.5.4) (MQO) (Malate dehydrogenase [quinone])                                                                                                                                                                                        | 419.9405 | -2.1336  | 0.270156 | -4.1961  | 2.72E-05 | 0.000258 | Cluster 1 |
| SAOUHSC_02784  | YP_501244.1 | 3921439 |       | Uncharacterized protein                                                                                                                                                                                                                                                           | 68.24512 | -1.97833 | 0.233737 | -4.18559 | 2.84E-05 | 0.000269 | Cluster 1 |
| SAOUHSC_01784  | YP_500289.1 | 3920426 | rplT  | 50S ribosomal protein L20                                                                                                                                                                                                                                                         | 349.1947 | 3.321237 | 0.555012 | 4.182317 | 2.89E-05 | 0.000272 | Cluster 5 |
| SAOUHSC_01134  | YP_499676.1 | 3920733 |       | Uncharacterized protein                                                                                                                                                                                                                                                           | 7.806611 | 2.907526 | 0.456261 | 4.180774 | 2.91E-05 | 0.000273 | Cluster 6 |
| SAOUHSC_00352  | YP_498941.1 | 3921825 |       | Integrase-like protein                                                                                                                                                                                                                                                            | 9.008195 | 2.813269 | 0.439028 | 4.130189 | 3.62E-05 | 0.000339 | Cluster 6 |
| SAOUHSC_01423  | YP_499949.1 | 3920654 |       | Uncharacterized protein                                                                                                                                                                                                                                                           | 101.7993 | 1.954335 | 0.232751 | 4.100237 | 4.13E-05 | 0.000385 | Cluster 6 |
| SAOUHSC_T00040 |             | 3921029 |       |                                                                                                                                                                                                                                                                                   | 92.64795 | 2.597076 | 0.393292 | 4.060792 | 4.89E-05 | 0.000454 | Cluster 5 |
| SAOUHSC_01783  | YP_500288.1 | 3920425 |       | Uncharacterized protein                                                                                                                                                                                                                                                           | 75.06631 | 3.394806 | 0.590311 | 4.056857 | 4.97E-05 | 0.00046  | Cluster 5 |
| SAOUHSC_02423  | YP_500894.1 | 3919633 |       | Probable uridylyltransferase SAOUHSC_02423 (EC 2.7.7.-)                                                                                                                                                                                                                           | 699.7148 | -1.68039 | 0.168543 | -4.03686 | 5.42E-05 | 0.000499 | Cluster 1 |
| SAOUHSC_02425  | YP_500896.1 | 3919635 |       | UPF0457 protein SAOUHSC_02425                                                                                                                                                                                                                                                     | 203.798  | 2.556863 | 0.387049 | 4.022397 | 5.76E-05 | 0.000529 | Cluster 4 |
| SAOUHSC_02537  | YP_501001.1 | 3921127 | mobA  | Probable molybdenum cofactor guanylyltransferase (MoCo guanylyltransferase) (EC 2.7.7.77) (GTP:molybdopterin guanylyltransferase) (Mo-MPT guanylyltransferase) (Molybdopterin guanylyltransferase) (Molybdopterin-guanine dinucleotide synthase) (MGD synthase)                   | 238.468  | -1.65434 | 0.162716 | -4.02137 | 5.79E-05 | 0.000529 | Cluster 1 |
| SAOUHSC_00609  | YP_499172.1 | 3918928 |       | Uncharacterized protein                                                                                                                                                                                                                                                           | 4.964856 | -4.72284 | 0.926405 | -4.01859 | 5.85E-05 | 0.000534 | Cluster 1 |
| SAOUHSC_01405  | YP_499932.1 | 3920695 |       | Uncharacterized protein                                                                                                                                                                                                                                                           | 61.11614 | 2.210022 | 0.302942 | 3.994235 | 6.49E-05 | 0.000589 | Cluster 5 |
| SAOUHSC_02544  | YP_501007.1 | 3921133 |       | Molybdenum cofactor biosynthesis protein B                                                                                                                                                                                                                                        | 92.24767 | -1.76562 | 0.192281 | -3.98177 | 6.84E-05 | 0.000619 | Cluster 1 |
| SAOUHSC_00146  | YP_498745.1 | 3919854 |       | Uncharacterized protein                                                                                                                                                                                                                                                           | 89.34202 | -2.38024 | 0.347776 | -3.96876 | 7.22E-05 | 0.000652 | Cluster 1 |
| SAOUHSC_01079  | YP_499626.1 | 3919242 |       | neurofilament protein                                                                                                                                                                                                                                                             | 39.73008 | 2.852966 | 0.467333 | 3.964976 | 7.34E-05 | 0.00066  | Cluster 5 |
| SAOUHSC_00541  | YP_499113.1 | 3920821 | tadA  | tRNA-specific adenosine deaminase (EC 3.5.4.33)                                                                                                                                                                                                                                   | 36.96414 | 2.206929 | 0.30532  | 3.953002 | 7.72E-05 | 0.000686 | Cluster 6 |
| SAOUHSC_00886  | YP_499439.1 | 3919233 | mnhD1 | Na(+)/H(+) antiporter subunit D1 (Mnh complex subunit D1)                                                                                                                                                                                                                         | 926.1551 | -1.87435 | 0.221165 | -3.95338 | 7.71E-05 | 0.000686 | Cluster 1 |
| SAOUHSC_01008  | YP_499558.1 | 3920269 | purE  | N5-carboxyaminoimidazole ribonucleotide mutase (N5-CAIR mutase) (EC 5.4.99.18) (5-(carboxyamino)imidazole ribonucleotide mutase)                                                                                                                                                  | 41.2167  | 2.605209 | 0.405909 | 3.954605 | 7.67E-05 | 0.000686 | Cluster 5 |

|                |             |         |       |                                                                                                                                                                            |          |          |          |          |          |          |           |
|----------------|-------------|---------|-------|----------------------------------------------------------------------------------------------------------------------------------------------------------------------------|----------|----------|----------|----------|----------|----------|-----------|
| SAOUHSC_02880  | YP_501334.1 | 3921550 | crtQ  | 4,4'-diaponeurosporenoate glycosyltransferase (EC 2.4.1.-)                                                                                                                 | 299.1857 | -2.20515 | 0.306014 | -3.93824 | 8.21E-05 | 0.000727 | Cluster 2 |
| SAOUHSC_02851  | YP_501308.1 | 3921524 | cidA  | Holin-like protein CidA                                                                                                                                                    | 39.11957 | -3.35961 | 0.601594 | -3.92226 | 8.77E-05 | 0.000775 | Cluster 1 |
| SAOUHSC_T00023 |             | 3921149 |       |                                                                                                                                                                            | 40.00213 | 3.075785 | 0.529803 | 3.918033 | 8.93E-05 | 0.000785 | Cluster 5 |
| SAOUHSC_01129  | YP_499672.1 | 3920729 | arcC1 | Carbamate kinase 1 (EC 2.7.2.2)                                                                                                                                            | 63.03168 | -2.81047 | 0.463198 | -3.90864 | 9.28E-05 | 0.000814 | Cluster 1 |
| SAOUHSC_02656  | YP_501118.1 | 3921218 |       | Uncharacterized protein                                                                                                                                                    | 94.65978 | -1.94222 | 0.242107 | -3.89178 | 9.95E-05 | 0.00087  | Cluster 1 |
| SAOUHSC_00201  | YP_498798.1 | 3920357 |       | conserved hypothetical protein                                                                                                                                             | 55.83211 | -3.27522 | 0.588976 | -3.86302 | 0.000112 | 0.000975 | Cluster 1 |
| SAOUHSC_01415  | YP_499942.1 | 3920647 |       | Uncharacterized protein                                                                                                                                                    | 568.5239 | -1.81849 | 0.212316 | -3.85507 | 0.000116 | 0.001004 | Cluster 3 |
| SAOUHSC_00208  | YP_498804.1 | 3920363 |       | Uncharacterized protein                                                                                                                                                    | 14.25263 | -2.67545 | 0.436018 | -3.84261 | 0.000122 | 0.001053 | Cluster 1 |
| SAOUHSC_T00031 |             | 3921157 |       |                                                                                                                                                                            | 28.49517 | 2.661177 | 0.433374 | 3.833126 | 0.000127 | 0.001091 | Cluster 5 |
| SAOUHSC_00022  | YP_498628.1 | 3919193 |       | Uncharacterized protein                                                                                                                                                    | 536.0863 | -1.80552 | 0.210773 | -3.82174 | 0.000133 | 0.001138 | Cluster 1 |
| SAOUHSC_03048  | YP_501494.1 | 3921312 |       | Uncharacterized protein                                                                                                                                                    | 17.39251 | -3.3398  | 0.612972 | -3.81714 | 0.000135 | 0.001156 | Cluster 1 |
| SAOUHSC_01003  | YP_499555.1 | 3920403 |       | Uncharacterized protein                                                                                                                                                    | 8.627678 | 3.757875 | 0.72356  | 3.811535 | 0.000138 | 0.001178 | Cluster 5 |
| SAOUHSC_01782  | YP_500287.1 | 3919700 |       | Uncharacterized protein                                                                                                                                                    | 71.67742 | 2.771577 | 0.466406 | 3.798358 | 0.000146 | 0.001239 | Cluster 6 |
| SAOUHSC_01089  | YP_499634.1 | 3919250 | isdG  | Heme oxygenase (staphylobilin-producing) 1 (EC 1.14.99.48) (Heme-degrading monooxygenase 1) (Iron-regulated surface determinant 1) (Iron-responsive surface determinant 1) | 9.956762 | 3.178736 | 0.575168 | 3.787997 | 0.000152 | 0.001287 | Cluster 6 |
| SAOUHSC_T00058 |             | 3921047 |       |                                                                                                                                                                            | 18.51501 | 2.897774 | 0.501518 | 3.784058 | 0.000154 | 0.001303 | Cluster 5 |
| SAOUHSC_02347  | YP_500824.1 | 3919391 | atpF  | ATP synthase subunit b (ATP synthase F0) sector subunit b) (ATPase subunit I) (F-type ATPase subunit b) (F-ATPase subunit b)                                               | 937.9554 | -1.58695 | 0.155518 | -3.7742  | 0.000161 | 0.001351 | Cluster 1 |
| SAOUHSC_00373  | YP_498962.1 | 3919792 |       | Xanthine permease, putative                                                                                                                                                | 402.4248 | 2.266333 | 0.335713 | 3.772066 | 0.000162 | 0.001354 | Cluster 6 |
| SAOUHSC_01785  | YP_500290.1 | 3920427 | rpmI  | 50S ribosomal protein L35                                                                                                                                                  | 429.2114 | 3.144435 | 0.56841  | 3.772691 | 0.000161 | 0.001354 | Cluster 5 |
| SAOUHSC_00023  | YP_498629.1 | 3919194 |       | Uncharacterized protein                                                                                                                                                    | 300.6003 | -1.92174 | 0.245931 | -3.74796 | 0.000178 | 0.001486 | Cluster 1 |
| SAOUHSC_02329  | YP_500808.1 | 3920954 | thiM  | Hydroxyethylthiazole kinase (EC 2.7.1.50) (4-methyl-5-beta-hydroxyethylthiazole kinase) (TH kinase) (Thz kinase)                                                           | 36.33771 | -2.81039 | 0.488106 | -3.70901 | 0.000208 | 0.001729 | Cluster 1 |
| SAOUHSC_00144  | YP_498743.1 | 3919852 |       | Uncharacterized protein                                                                                                                                                    | 648.9618 | -1.73682 | 0.198968 | -3.7032  | 0.000213 | 0.001763 | Cluster 1 |
| SAOUHSC_02646  | YP_501108.1 | 3921208 |       | Uncharacterized protein                                                                                                                                                    | 52.53956 | -2.11986 | 0.302616 | -3.70058 | 0.000215 | 0.001775 | Cluster 1 |
| SAOUHSC_01904  | YP_500405.1 | 3920851 | crcB2 | Putative fluoride ion transporter CrcB 2                                                                                                                                   | 12.1653  | 2.262352 | 0.341578 | 3.695647 | 0.000219 | 0.001804 | Cluster 6 |
| SAOUHSC_01014  | YP_499564.1 | 3920275 | purF  | Amidophosphoribosyltransferase (ATase) (EC 2.4.2.14) (Glutamine phosphoribosylpyrophosphate amidotransferase) (GPATase)                                                    | 138.8499 | 1.908359 | 0.246237 | 3.688958 | 0.000225 | 0.001847 | Cluster 6 |
| SAOUHSC_01086  | YP_499631.1 | 3919247 |       | iron compound ABC transporter permease protein putative                                                                                                                    | 22.17357 | 3.129892 | 0.578967 | 3.678781 | 0.000234 | 0.001916 | Cluster 6 |
| SAOUHSC_01811  | YP_500316.1 | 3919281 | dnaE  | DNA polymerase III subunit alpha (EC 2.7.7.7)                                                                                                                              | 711.8171 | -1.91331 | 0.248474 | -3.6757  | 0.000237 | 0.001933 | Cluster 1 |
| SAOUHSC_00412  | YP_498998.1 | 3920570 |       | NADH dehydrogenase subunit 5, putative (EC 1.6.5.3)                                                                                                                        | 326.4485 | 1.879441 | 0.239864 | 3.666413 | 0.000246 | 0.001998 | Cluster 6 |
| SAOUHSC_02402  | YP_500878.1 | 3919617 |       | PTS system, mannitol-specific Ila component, putative (EC 2.7.1.69)                                                                                                        | 157.6249 | -1.67526 | 0.184472 | -3.66052 | 0.000252 | 0.002038 | Cluster 1 |
| SAOUHSC_02956  | YP_501407.1 | 3921659 | nsaR  | DNA-binding response regulator, putative                                                                                                                                   | 99.6463  | -1.82735 | 0.226803 | -3.64787 | 0.000264 | 0.002134 | Cluster 1 |
| SAOUHSC_01606  | YP_500121.1 | 3920022 |       | Peptidase T, putative (EC 3.4.11.14)                                                                                                                                       | 214.9255 | -2.06288 | 0.291727 | -3.64339 | 0.000269 | 0.002164 | Cluster 1 |
| SAOUHSC_00999  | YP_499551.1 | 3920399 | qoxD  | Probable quinol oxidase subunit 4 (EC 1.10.3.-) (Quinol oxidase polypeptide IV)                                                                                            | 845.8333 | -2.23801 | 0.342609 | -3.61347 | 0.000302 | 0.002423 | Cluster 1 |
| SAOUHSC_03035  | YP_501483.1 | 3921301 |       | Uncharacterized protein                                                                                                                                                    | 249.0009 | -2.12006 | 0.31095  | -3.60205 | 0.000316 | 0.002524 | Cluster 1 |
| SAOUHSC_02983  | YP_501432.1 | 3921465 | gtfB  | UDP-N-acetylglucosamine--peptide N-acetylglucosaminyltransferase stabilizing protein GtfB (Glycosyltransferase stabilizing protein GtfB)                                   | 402.7251 | -1.74591 | 0.207868 | -3.58836 | 0.000333 | 0.002652 | Cluster 1 |
| SAOUHSC_02549  | YP_501011.1 | 3921137 |       | Molybdenum ABC transporter, periplasmic molybdate-binding protein                                                                                                          | 213.7503 | -2.332   | 0.371862 | -3.58196 | 0.000341 | 0.002709 | Cluster 1 |
| SAOUHSC_01617  | YP_500131.1 | 3920032 | argR  | Arginine repressor                                                                                                                                                         | 119.6278 | -1.68298 | 0.191086 | -3.57423 | 0.000351 | 0.002782 | Cluster 1 |
| SAOUHSC_01099  | YP_499643.1 | 3920741 | mutS2 | Endonuclease MutS2 (EC 3.1.-.-)                                                                                                                                            | 347.5195 | -1.60363 | 0.169701 | -3.55703 | 0.000375 | 0.002961 | Cluster 1 |
| SAOUHSC_02780  | YP_501240.1 | 3921435 |       | Uncharacterized protein                                                                                                                                                    | 72.88298 | -1.75536 | 0.212661 | -3.55196 | 0.000382 | 0.003009 | Cluster 1 |
| SAOUHSC_01087  | YP_499632.1 | 3919248 |       | Iron compound ABC transporter, permease protein                                                                                                                            | 12.63885 | 3.042512 | 0.575622 | 3.548355 | 0.000388 | 0.003041 | Cluster 6 |
| SAOUHSC_T00061 |             | 3921069 |       |                                                                                                                                                                            | 29.14237 | 3.249723 | 0.638841 | 3.521566 | 0.000429 | 0.003355 | Cluster 5 |
| SAOUHSC_01679  | YP_500189.1 | 3920090 |       | Uncharacterized protein                                                                                                                                                    | 658.2267 | 1.994392 | 0.285913 | 3.47796  | 0.000505 | 0.003939 | Cluster 5 |
| SAOUHSC_02171  | YP_500658.1 | 3921865 |       | Staphylokinase, putative                                                                                                                                                   | 88.5302  | -2.62413 | 0.467633 | -3.47308 | 0.000515 | 0.003999 | Cluster 1 |
| SAOUHSC_00353  | YP_498942.1 | 3921826 |       | Uncharacterized protein                                                                                                                                                    | 5.450071 | 3.074865 | 0.598462 | 3.466994 | 0.000526 | 0.004075 | Cluster 6 |
| SAOUHSC_01395  | YP_499922.1 | 3920685 | asd   | Aspartate-semialdehyde dehydrogenase (ASA dehydrogenase) (ASADH) (EC 1.2.1.11) (Aspartate-beta-semialdehyde dehydrogenase)                                                 | 1297.924 | 2.507969 | 0.435025 | 3.466397 | 0.000527 | 0.004075 | Cluster 4 |
| SAOUHSC_03018  | YP_501467.1 | 3921285 |       | Uncharacterized protein                                                                                                                                                    | 66.62694 | 3.083619 | 0.601271 | 3.46536  | 0.00053  | 0.004078 | Cluster 6 |
| SAOUHSC_T0001  |             | 3921517 |       |                                                                                                                                                                            | 23.02221 | 3.124374 | 0.614681 | 3.456059 | 0.000548 | 0.004209 | Cluster 6 |
| SAOUHSC_00775  | YP_499332.1 | 3919066 |       | Uncharacterized protein                                                                                                                                                    | 35.69203 | 2.172301 | 0.339457 | 3.453462 | 0.000553 | 0.004237 | Cluster 6 |
| SAOUHSC_00297  | YP_498887.1 | 3918978 |       | Uncharacterized protein                                                                                                                                                    | 120.6503 | 1.977222 | 0.283249 | 3.450041 | 0.000561 | 0.004278 | Cluster 5 |
| SAOUHSC_02346  | YP_500823.1 | 3919390 | atpH  | ATP synthase subunit delta (ATP synthase F1) sector subunit delta) (F-type ATPase subunit delta) (F-ATPase subunit delta)                                                  | 829.4274 | -1.61152 | 0.177847 | -3.43845 | 0.000585 | 0.004452 | Cluster 1 |
| SAOUHSC_01001  | YP_499553.1 | 3920401 | qoxB  | Probable quinol oxidase subunit 1 (EC 1.10.3.-) (Quinol oxidase polypeptide I)                                                                                             | 4950.874 | -2.2561  | 0.365608 | -3.43565 | 0.000591 | 0.004485 | Cluster 1 |

|               |             |         |       |                                                                                                                                                                                                                                                                                                                                                                                                                                                                                                                                                                     |          |          |          |          |          |          |           |
|---------------|-------------|---------|-------|---------------------------------------------------------------------------------------------------------------------------------------------------------------------------------------------------------------------------------------------------------------------------------------------------------------------------------------------------------------------------------------------------------------------------------------------------------------------------------------------------------------------------------------------------------------------|----------|----------|----------|----------|----------|----------|-----------|
| SAOUHSC_02350 | YP_500826.1 | 3919393 | atpB  | ATP synthase subunit a (ATP synthase F0 sector subunit a) (F-ATPase subunit 6)                                                                                                                                                                                                                                                                                                                                                                                                                                                                                      | 1232.134 | -1.58947 | 0.171685 | -3.43341 | 0.000596 | 0.004509 | Cluster 1 |
| SAOUHSC_01065 | YP_499611.1 | 3921727 | ctaA  | Heme A synthase (HAS) (EC 1.3.-.-) (Cytochrome aa3-controlling protein)                                                                                                                                                                                                                                                                                                                                                                                                                                                                                             | 174.2664 | -1.52281 | 0.152394 | -3.43063 | 0.000602 | 0.004542 | Cluster 1 |
| SAOUHSC_02254 | YP_500736.1 | 3919674 | groEL | 60 kDa chaperone family; promotes refolding of misfolded polypeptides especially under stressful conditions; forms two stacked rings of heptamers to form a barrel-shaped 14mer; ends can be capped by GroES; misfolded proteins enter the barrel where they are refolded when GroES binds; many bacteria have multiple copies of the groEL gene which are active under different environmental conditions; the B.japonicum protein in this cluster is expressed constitutively; in Rhodobacter, Corynebacterium and Rhizobium this protein is essential for growth | 6220.094 | 2.666605 | 0.486465 | 3.425952 | 0.000613 | 0.004607 | Cluster 4 |
| SAOUHSC_01012 | YP_499562.1 | 3920273 | purQ  | Phosphoribosylformylglycinamide synthase subunit PurQ (FGAM synthase) (EC 6.3.5.3) (Formylglycinamide ribonucleotide amidotransferase subunit I) (FGAR amidotransferase I) (FGAR-AT I) (Glutaminase PurQ) (EC 3.5.1.2) (Phosphoribosylformylglycinamide synthase subunit I)                                                                                                                                                                                                                                                                                         | 46.49895 | 1.726092 | 0.212235 | 3.421171 | 0.000624 | 0.004675 | Cluster 5 |
| SAOUHSC_01796 | YP_500300.1 | 3920437 |       | Formamidopyrimidine-DNA glycosylase (EC 3.2.2.-) (EC 3.2.2.23) (EC 4.2.99.18)                                                                                                                                                                                                                                                                                                                                                                                                                                                                                       | 258.1607 | -1.74528 | 0.218524 | -3.41052 | 0.000648 | 0.004847 | Cluster 1 |
| SAOUHSC_00957 | YP_499510.1 | 3920668 |       | Uncharacterized protein                                                                                                                                                                                                                                                                                                                                                                                                                                                                                                                                             | 183.7123 | 2.881107 | 0.55588  | 3.384016 | 0.000714 | 0.005324 | Cluster 5 |
| SAOUHSC_02538 | YP_501002.1 | 3921128 |       | Molybdopterin converting factor, subunit 1                                                                                                                                                                                                                                                                                                                                                                                                                                                                                                                          | 106.5202 | -1.87285 | 0.258438 | -3.37742 | 0.000732 | 0.005437 | Cluster 1 |
| SAOUHSC_00967 | YP_499520.1 | 3920112 |       | Uncharacterized protein                                                                                                                                                                                                                                                                                                                                                                                                                                                                                                                                             | 3.650673 | 3.273204 | 0.675503 | 3.365202 | 0.000765 | 0.005667 | Cluster 6 |
| SAOUHSC_01233 | YP_499766.1 | 3920258 |       | Uncharacterized protein                                                                                                                                                                                                                                                                                                                                                                                                                                                                                                                                             | 275.8199 | 2.71413  | 0.513055 | 3.341023 | 0.000835 | 0.006151 | Cluster 5 |
| SAOUHSC_03019 | YP_501468.1 | 3921286 |       | ABC transporter, ATP-binding protein, putative                                                                                                                                                                                                                                                                                                                                                                                                                                                                                                                      | 165.4829 | 2.787867 | 0.535146 | 3.340897 | 0.000835 | 0.006151 | Cluster 6 |
| SAOUHSC_01894 | YP_500395.1 | 3920841 | arsC  | Arsenate reductase (EC 1.20.4.4)                                                                                                                                                                                                                                                                                                                                                                                                                                                                                                                                    | 24.74373 | 2.182976 | 0.354981 | 3.332506 | 0.000861 | 0.006322 | Cluster 5 |
| SAOUHSC_02645 | YP_501107.1 | 3921207 |       | Uncharacterized HTH-type transcriptional regulator SAOUHSC_02645                                                                                                                                                                                                                                                                                                                                                                                                                                                                                                    | 52.71219 | -2.40726 | 0.424204 | -3.31742 | 0.000909 | 0.006654 | Cluster 1 |
| SAOUHSC_01223 | YP_499759.1 | 3920251 | gidJ  | TrmFO; Gid; glucose-inhibited division protein; similar to GidA; the gene from Bacillus subtilis encodes a tRNA-methyltransferase that utilizes folate as the carbon donor and bound flavin as reductant; modifies tRNA at position 54 (uridine) of the T-psi loop to form a C5-methyluridine                                                                                                                                                                                                                                                                       | 491.5372 | 2.080805 | 0.325932 | 3.316046 | 0.000913 | 0.006667 | Cluster 6 |
| SAOUHSC_02685 | YP_501147.1 | 3919704 |       | Uncharacterized protein                                                                                                                                                                                                                                                                                                                                                                                                                                                                                                                                             | 8.381982 | -3.12755 | 0.642262 | -3.31259 | 0.000924 | 0.006731 | Cluster 1 |
| SAOUHSC_00883 | YP_499436.1 | 3919230 | mnhG1 | Na(+)/H(+) antiporter subunit G1 (Mnh complex subunit G1)                                                                                                                                                                                                                                                                                                                                                                                                                                                                                                           | 247.0121 | -1.79243 | 0.239941 | -3.30259 | 0.000958 | 0.006955 | Cluster 1 |
| SAOUHSC_02379 | YP_500856.1 | 3919422 | deoC  | Deoxyribose-phosphate aldolase (DERA) (EC 4.1.2.4) (2-deoxy-D-ribose 5-phosphate aldolase) (Phosphodeoxyriboaldolase) (Deoxyriboaldolase)                                                                                                                                                                                                                                                                                                                                                                                                                           | 467.4846 | -1.75312 | 0.230562 | -3.26645 | 0.001089 | 0.007885 | Cluster 1 |
| SAOUHSC_00910 | YP_499463.1 | 3920797 |       | Uncharacterized protein                                                                                                                                                                                                                                                                                                                                                                                                                                                                                                                                             | 225.743  | 1.750966 | 0.230817 | 3.253516 | 0.00114  | 0.008229 | Cluster 5 |
| SAOUHSC_00776 | YP_499333.1 | 3919067 |       | Excinuclease ABC, B subunit                                                                                                                                                                                                                                                                                                                                                                                                                                                                                                                                         | 199.0672 | -1.85455 | 0.26312  | -3.24777 | 0.001163 | 0.008373 | Cluster 1 |
| SAOUHSC_00132 | YP_498732.1 | 3919841 | aldA  | Putative aldehyde dehydrogenase AldA (EC 1.2.1.3)                                                                                                                                                                                                                                                                                                                                                                                                                                                                                                                   | 842.6101 | 1.953716 | 0.29411  | 3.242717 | 0.001184 | 0.008499 | Cluster 4 |
| SAOUHSC_01000 | YP_499552.1 | 3920400 | qoxC  | Probable quinol oxidase subunit 3 (EC 1.10.3.-) (Quinol oxidase polypeptide III)                                                                                                                                                                                                                                                                                                                                                                                                                                                                                    | 2134.193 | -2.27441 | 0.393681 | -3.23716 | 0.001207 | 0.008642 | Cluster 1 |
| SAOUHSC_02972 | YP_501423.1 | 3921673 | isaB  | Immunodominant staphylococcal antigen B                                                                                                                                                                                                                                                                                                                                                                                                                                                                                                                             | 245.7556 | -2.13486 | 0.352181 | -3.22238 | 0.001271 | 0.009075 | Cluster 1 |
| SAOUHSC_00355 | YP_498944.1 | 3921828 |       | Uncharacterized protein                                                                                                                                                                                                                                                                                                                                                                                                                                                                                                                                             | 6.582603 | 2.909186 | 0.595155 | 3.207878 | 0.001337 | 0.009518 | Cluster 5 |
| SAOUHSC_01411 | YP_499938.1 | 3920643 |       | Putative branched-chain amino acid carrier protein SAOUHSC_01411                                                                                                                                                                                                                                                                                                                                                                                                                                                                                                    | 102.7792 | 2.173482 | 0.36599  | 3.206326 | 0.001344 | 0.009543 | Cluster 5 |
| SAOUHSC_02753 | YP_501212.1 | 3921625 |       | Membrane protein, putative                                                                                                                                                                                                                                                                                                                                                                                                                                                                                                                                          | 238.4299 | -1.6712  | 0.209562 | -3.20289 | 0.001361 | 0.00963  | Cluster 1 |
| SAOUHSC_01326 | YP_499856.1 | 3920191 |       | Uncharacterized protein                                                                                                                                                                                                                                                                                                                                                                                                                                                                                                                                             | 534.3122 | 2.52231  | 0.477181 | 3.190218 | 0.001422 | 0.010035 | Cluster 6 |
| SAOUHSC_00779 | YP_499336.1 | 3919069 |       | UvrABC system protein B                                                                                                                                                                                                                                                                                                                                                                                                                                                                                                                                             | 225.7169 | -1.92747 | 0.292433 | -3.17155 | 0.001516 | 0.010673 | Cluster 1 |
| SAOUHSC_00898 | YP_499451.1 | 3921744 | argH  | Argininosuccinate lyase (ASAL) (EC 4.3.2.1) (Argininosuccinase)                                                                                                                                                                                                                                                                                                                                                                                                                                                                                                     | 560.8832 | 1.601213 | 0.189833 | 3.167056 | 0.00154  | 0.010809 | Cluster 4 |
| SAOUHSC_01981 | YP_500478.1 | 3920457 |       | Sensor histidine kinase, putative                                                                                                                                                                                                                                                                                                                                                                                                                                                                                                                                   | 82.57372 | 1.635103 | 0.201603 | 3.150271 | 0.001631 | 0.011418 | Cluster 6 |
| SAOUHSC_01010 | YP_499560.1 | 3920271 | purC  | Phosphoribosylaminoimidazole-succinocarboxamide synthase (EC 6.3.2.6) (SAICAR synthetase)                                                                                                                                                                                                                                                                                                                                                                                                                                                                           | 33.98492 | 1.869536 | 0.276308 | 3.14698  | 0.00165  | 0.01149  | Cluster 6 |
| SAOUHSC_02351 | YP_500827.1 | 3919394 |       | Uncharacterized protein                                                                                                                                                                                                                                                                                                                                                                                                                                                                                                                                             | 753.3143 | -1.56966 | 0.181027 | -3.14684 | 0.00165  | 0.01149  | Cluster 1 |
| SAOUHSC_01673 | YP_500184.1 | 3920085 |       | Uncharacterized protein                                                                                                                                                                                                                                                                                                                                                                                                                                                                                                                                             | 200.8996 | -1.86843 | 0.276176 | -3.14448 | 0.001664 | 0.011551 | Cluster 1 |
| SAOUHSC_01992 | YP_500489.1 | 3921875 |       | Phosphotransferase system, EIIc domain protein                                                                                                                                                                                                                                                                                                                                                                                                                                                                                                                      | 102.5711 | 2.040953 | 0.331219 | 3.142792 | 0.001673 | 0.011586 | Cluster 6 |
| SAOUHSC_02403 | YP_500879.1 | 3919618 | mtlD  | Mannitol-1-phosphate 5-dehydrogenase (EC 1.1.1.17)                                                                                                                                                                                                                                                                                                                                                                                                                                                                                                                  | 266.1138 | -1.49784 | 0.158633 | -3.13833 | 0.001699 | 0.011732 | Cluster 1 |
| SAOUHSC_00806 | YP_499362.1 | 3919369 |       | Uncharacterized protein                                                                                                                                                                                                                                                                                                                                                                                                                                                                                                                                             | 34.90498 | -1.92023 | 0.294602 | -3.12364 | 0.001786 | 0.0123   | Cluster 1 |
| SAOUHSC_00266 | YP_498859.1 | 3919207 |       | Uncharacterized protein                                                                                                                                                                                                                                                                                                                                                                                                                                                                                                                                             | 18.89888 | -2.14519 | 0.366791 | -3.12219 | 0.001795 | 0.012327 | Cluster 1 |
| SAOUHSC_00133 | YP_498733.1 | 3919842 |       | Uncharacterized protein                                                                                                                                                                                                                                                                                                                                                                                                                                                                                                                                             | 102.5129 | -1.75545 | 0.242362 | -3.11704 | 0.001827 | 0.012511 | Cluster 1 |
| SAOUHSC_02447 | YP_500914.1 | 3919010 |       | Uncharacterized protein                                                                                                                                                                                                                                                                                                                                                                                                                                                                                                                                             | 579.5431 | -1.76037 | 0.244339 | -3.11195 | 0.001859 | 0.012694 | Cluster 3 |
| SAOUHSC_01193 | YP_499732.1 | 3919326 |       | Uncharacterized protein SAOUHSC_01193                                                                                                                                                                                                                                                                                                                                                                                                                                                                                                                               | 488.1639 | 1.789466 | 0.254109 | 3.106793 | 0.001891 | 0.012883 | Cluster 5 |
| SAOUHSC_02444 | YP_500912.1 | 3919008 |       | Osmoprotectant transporter, BCCT family, opuD-like protein, putative                                                                                                                                                                                                                                                                                                                                                                                                                                                                                                | 539.054  | 1.907301 | 0.293898 | 3.087131 | 0.002021 | 0.01373  | Cluster 6 |

|                |             |         |       |                                                                                                                                                                                                                      |          |          |          |          |          |          |           |
|----------------|-------------|---------|-------|----------------------------------------------------------------------------------------------------------------------------------------------------------------------------------------------------------------------|----------|----------|----------|----------|----------|----------|-----------|
| SAOUHSC_02955  | YP_501406.1 | 3921658 | nsaS  | Sensor histidine kinase, putative                                                                                                                                                                                    | 88.27115 | -1.81506 | 0.264504 | -3.08146 | 0.00206  | 0.013956 | Cluster 1 |
| SAOUHSC_00160  | YP_498758.1 | 3919867 |       | Uncharacterized protein                                                                                                                                                                                              | 113.0992 | -1.91718 | 0.298375 | -3.07392 | 0.002113 | 0.014276 | Cluster 1 |
| SAOUHSC_00808  | YP_499364.1 | 3919371 |       | Uncharacterized protein                                                                                                                                                                                              | 53.01123 | -1.79603 | 0.259342 | -3.06941 | 0.002145 | 0.014455 | Cluster 1 |
| SAOUHSC_00683  | YP_499242.1 | 3919446 |       | Uncharacterized protein                                                                                                                                                                                              | 32.08712 | 1.94408  | 0.307735 | 3.067829 | 0.002156 | 0.014493 | Cluster 6 |
| SAOUHSC_00533  | YP_499105.1 | 3920386 | hchA  | Protein/nucleic acid deglycase HchA (EC 3.1.2.-) (EC 3.5.1.-) (EC 3.5.1.124) (Maillard deglycase)                                                                                                                    | 1116.474 | 2.167147 | 0.380834 | 3.064711 | 0.002179 | 0.014606 | Cluster 5 |
| SAOUHSC_00647  | YP_499207.1 | 3919939 |       | Uncharacterized protein                                                                                                                                                                                              | 923.817  | -1.71674 | 0.234518 | -3.0562  | 0.002242 | 0.014987 | Cluster 3 |
| SAOUHSC_T00013 |             | 3921332 |       |                                                                                                                                                                                                                      | 35.01336 | 2.385438 | 0.455202 | 3.043566 | 0.002338 | 0.01559  | Cluster 5 |
| SAOUHSC_00807  | YP_499363.1 | 3919370 |       | Uncharacterized protein                                                                                                                                                                                              | 31.25636 | -1.97555 | 0.321404 | -3.03527 | 0.002403 | 0.015963 | Cluster 1 |
| SAOUHSC_01015  | YP_499565.1 | 3920276 | purM  | Phosphoribosylformylglycinamide cyclo-ligase (EC 6.3.3.1) (AIR synthase) (AIRS) (Phosphoribosyl-aminoimidazole synthetase)                                                                                           | 121.1789 | 1.910278 | 0.29994  | 3.034865 | 0.002406 | 0.015963 | Cluster 6 |
| SAOUHSC_00559  | YP_499131.1 | 3920604 |       | Protein VraC                                                                                                                                                                                                         | 62.45921 | 3.081252 | 0.68694  | 3.029744 | 0.002448 | 0.016194 | Cluster 5 |
| SAOUHSC_02923  | YP_501376.1 | 3921374 |       | Uncharacterized protein                                                                                                                                                                                              | 1402.674 | 2.496547 | 0.494757 | 3.024811 | 0.002488 | 0.016417 | Cluster 6 |
| SAOUHSC_00198  | YP_498795.1 | 3920354 |       | Uncharacterized protein                                                                                                                                                                                              | 118.2726 | -1.87714 | 0.290218 | -3.02234 | 0.002508 | 0.016509 | Cluster 1 |
| SAOUHSC_02727  | YP_501190.1 | 3921603 |       | Uncharacterized protein                                                                                                                                                                                              | 141.8918 | -1.76243 | 0.252636 | -3.01788 | 0.002545 | 0.01671  | Cluster 1 |
| SAOUHSC_00914  | YP_499467.1 | 3920801 |       | 2-isopropylmalate synthase, putative (EC 2.3.3.13)                                                                                                                                                                   | 12.01014 | 3.525065 | 0.837663 | 3.014417 | 0.002575 | 0.016859 | Cluster 5 |
| SAOUHSC_02588  | YP_501050.2 | 3921584 |       | Uncharacterized protein                                                                                                                                                                                              | 6.201684 | 2.613745 | 0.536619 | 3.007245 | 0.002636 | 0.017217 | Cluster 6 |
| SAOUHSC_00572  | YP_499140.1 | 3920613 |       | Uncharacterized protein                                                                                                                                                                                              | 73.74128 | 1.913551 | 0.304231 | 3.002818 | 0.002675 | 0.017425 | Cluster 6 |
| SAOUHSC_02760  | YP_501219.1 | 3921632 |       | Glutamate synthase alpha subunit, putative (EC 1.4.1.13)                                                                                                                                                             | 154.3401 | -1.55018 | 0.184136 | -2.98788 | 0.002809 | 0.018253 | Cluster 1 |
| SAOUHSC_02331  | YP_500810.1 | 3920956 | tenA  | Aminopyrimidine aminohydrolase (EC 3.5.99.2) (Thiaminase II)                                                                                                                                                         | 13.4151  | -2.30632 | 0.437433 | -2.98634 | 0.002823 | 0.018298 | Cluster 1 |
| SAOUHSC_00915  | YP_499468.1 | 3920802 |       | Uncharacterized protein                                                                                                                                                                                              | 8.02473  | 2.881141 | 0.630099 | 2.985467 | 0.002831 | 0.018303 | Cluster 5 |
| SAOUHSC_00916  | YP_499469.1 | 3920803 |       | Uncharacterized protein                                                                                                                                                                                              | 12.13568 | 2.209733 | 0.406894 | 2.973091 | 0.002948 | 0.019009 | Cluster 6 |
| SAOUHSC_01574  | YP_500089.1 | 3920168 |       | Helix-turn-helix domain protein                                                                                                                                                                                      | 20.94457 | 3.009569 | 0.676156 | 2.972048 | 0.002958 | 0.019026 | Cluster 4 |
| SAOUHSC_00010  | YP_498618.1 | 3919183 |       | Uncharacterized protein                                                                                                                                                                                              | 192.6292 | 2.437167 | 0.484841 | 2.964202 | 0.003035 | 0.019468 | Cluster 6 |
| SAOUHSC_R0008  |             | 3921508 |       |                                                                                                                                                                                                                      | 69620.65 | 2.755252 | 0.594892 | 2.95054  | 0.003172 | 0.020299 | Cluster 4 |
| SAOUHSC_00798  | YP_499354.1 | 3919361 | gpml  | 2,3-bisphosphoglycerate-independent phosphoglycerate mutase (BPG-independent PGAM) (Phosphoglyceromutase) (iPGM) (EC 5.4.2.12)                                                                                       | 1917.87  | -1.7294  | 0.247862 | -2.94276 | 0.003253 | 0.020763 | Cluster 1 |
| SAOUHSC_01316  | YP_499846.1 | 3920142 |       | Uncharacterized protein                                                                                                                                                                                              | 11.63611 | 2.141954 | 0.389041 | 2.935305 | 0.003332 | 0.021216 | Cluster 6 |
| SAOUHSC_01208  | YP_499745.1 | 3919474 | rpsP  | 30S ribosomal protein S16                                                                                                                                                                                            | 161.3786 | 2.317022 | 0.450466 | 2.923687 | 0.003459 | 0.021968 | Cluster 5 |
| SAOUHSC_02349  | YP_500825.1 | 3919392 | atpE  | ATP synthase subunit c (ATP synthase F0) sector subunit c) (F-type ATPase subunit c) (F-ATPase subunit c) (Lipid-binding protein)                                                                                    | 632.8089 | -1.62444 | 0.213883 | -2.91952 | 0.003506 | 0.022209 | Cluster 1 |
| SAOUHSC_01786  | YP_500291.1 | 3920428 | infC  | Translation initiation factor IF-3                                                                                                                                                                                   | 575.2045 | 2.729848 | 0.592842 | 2.91789  | 0.003524 | 0.022269 | Cluster 5 |
| SAOUHSC_01205  | YP_499742.1 | 3919471 | ftsY  | Signal recognition particle receptor FtsY (SRP receptor)                                                                                                                                                             | 199.5592 | -1.7319  | 0.251875 | -2.9058  | 0.003663 | 0.023091 | Cluster 1 |
| SAOUHSC_02124  | YP_500615.1 | 3921195 | pcrB  | Heptaprenylglyceryl phosphate synthase (HepGP synthase) (EC 2.5.1.n9) (Glycerol-1-phosphate heptaprenyltransferase)                                                                                                  | 29.24298 | 1.705495 | 0.243086 | 2.902244 | 0.003705 | 0.023296 | Cluster 6 |
| SAOUHSC_02093  | YP_500585.1 | 3921166 |       | UPF0435 protein SAOUHSC_02093                                                                                                                                                                                        | 28.05067 | 2.129303 | 0.389528 | 2.899155 | 0.003742 | 0.023469 | Cluster 6 |
| SAOUHSC_01336  | YP_499865.1 | 3920200 |       | UPF0291 protein SAOUHSC_01336                                                                                                                                                                                        | 81.18322 | 1.858224 | 0.296789 | 2.891695 | 0.003832 | 0.023953 | Cluster 4 |
| SAOUHSC_01372  | YP_499899.1 | 3920781 | trpA  | Tryptophan synthase alpha chain (EC 4.2.1.20)                                                                                                                                                                        | 25.71409 | 1.785546 | 0.271703 | 2.891196 | 0.003838 | 0.023953 | Cluster 6 |
| SAOUHSC_03021  | YP_501470.1 | 3921288 |       | Uncharacterized protein                                                                                                                                                                                              | 92.6622  | 2.729718 | 0.600437 | 2.880766 | 0.003967 | 0.024699 | Cluster 6 |
| SAOUHSC_00009  | YP_498617.1 | 3919182 | serS  | Serine--tRNA ligase (EC 6.1.1.11) (Seryl-tRNA synthetase) (SerRS) (Seryl-tRNA(Ser/Sec) synthetase)                                                                                                                   | 594.9093 | -1.93725 | 0.326232 | -2.87296 | 0.004067 | 0.025256 | Cluster 2 |
| SAOUHSC_01632  | YP_500145.1 | 3919969 | gcvPB | Probable glycine dehydrogenase (decarboxylating) subunit 2 (EC 1.4.4.2) (Glycine cleavage system P-protein subunit 2) (Glycine decarboxylase subunit 2) (Glycine dehydrogenase (aminomethyl-transferring) subunit 2) | 355.3151 | 1.575909 | 0.201283 | 2.861193 | 0.00422  | 0.026149 | Cluster 6 |
| SAOUHSC_00833  | YP_499387.1 | 3918945 |       | Uncharacterized protein                                                                                                                                                                                              | 201.4714 | 1.96434  | 0.337455 | 2.857687 | 0.004267 | 0.026375 | Cluster 4 |
| SAOUHSC_02281  | YP_500763.1 | 3919156 | ilvD  | Dihydroxy-acid dehydratase (DAD) (EC 4.2.1.9)                                                                                                                                                                        | 514.4671 | 2.104743 | 0.386828 | 2.855902 | 0.004291 | 0.026459 | Cluster 5 |
| SAOUHSC_00582  | YP_499149.1 | 3920506 |       | Uncharacterized protein                                                                                                                                                                                              | 22.3863  | 1.958155 | 0.335798 | 2.85337  | 0.004326 | 0.026598 | Cluster 5 |
| SAOUHSC_02345  | YP_500822.1 | 3920968 | atpA  | ATP synthase subunit alpha (EC 7.1.2.2) (ATP synthase F1 sector subunit alpha) (F-ATPase subunit alpha)                                                                                                              | 1960.728 | -1.57048 | 0.199978 | -2.8527  | 0.004335 | 0.026598 | Cluster 1 |
| SAOUHSC_00686  | YP_499245.1 | 3920990 |       | Uncharacterized protein                                                                                                                                                                                              | 116.6681 | 1.594262 | 0.208446 | 2.850913 | 0.004359 | 0.026683 | Cluster 6 |
| SAOUHSC_01891  | YP_500393.1 | 3920839 |       | Arsenate operon regulator                                                                                                                                                                                            | 23.3786  | 2.778805 | 0.625495 | 2.843836 | 0.004457 | 0.027217 | Cluster 6 |
| SAOUHSC_02010  | YP_500507.1 | 3920464 |       | Uncharacterized protein                                                                                                                                                                                              | 57.27234 | 1.672731 | 0.237919 | 2.827558 | 0.00469  | 0.028571 | Cluster 6 |
| SAOUHSC_T00015 |             | 3921334 |       |                                                                                                                                                                                                                      | 62.23177 | 2.195856 | 0.426437 | 2.804296 | 0.005043 | 0.030624 | Cluster 5 |
| SAOUHSC_T00016 |             | 3921335 |       |                                                                                                                                                                                                                      | 123.02   | 1.989367 | 0.352876 | 2.803726 | 0.005052 | 0.030624 | Cluster 5 |
| SAOUHSC_00603  | YP_499166.1 | 3918922 |       | Uncharacterized protein                                                                                                                                                                                              | 132.9141 | -1.46917 | 0.167543 | -2.80029 | 0.005106 | 0.030731 | Cluster 1 |
| SAOUHSC_01653  | YP_500165.1 | 3920105 | sodA  | Superoxide dismutase [Mn] 1 (EC 1.15.1.1)                                                                                                                                                                            | 1132.688 | 1.626875 | 0.223762 | 2.801521 | 0.005086 | 0.030731 | Cluster 5 |
| SAOUHSC_01655  | YP_500166.1 | 3920106 | fur   | Ferric uptake regulation protein (Ferric uptake regulator)                                                                                                                                                           | 40.63946 | 2.270729 | 0.453681 | 2.800934 | 0.005095 | 0.030731 | Cluster 6 |
| SAOUHSC_R0007  |             | 3921507 |       |                                                                                                                                                                                                                      | 66576.62 | 2.678523 | 0.601072 | 2.792549 | 0.005229 | 0.03139  | Cluster 4 |

|                |             |         |       |                                                                                                                       |          |          |          |          |          |          |           |
|----------------|-------------|---------|-------|-----------------------------------------------------------------------------------------------------------------------|----------|----------|----------|----------|----------|----------|-----------|
| SAOUHSC_01799  | YP_500303.1 | 3920440 |       | Histidine kinase-, DNA gyrase B-, and HSP90-like ATPase domain protein                                                | 241.254  | -1.3901  | 0.139727 | -2.7919  | 0.00524  | 0.03139  | Cluster 1 |
| SAOUHSC_02378  | YP_500855.1 | 3919421 |       | Uncharacterized protein                                                                                               | 126.3061 | -1.79004 | 0.284888 | -2.77317 | 0.005551 | 0.033077 | Cluster 1 |
| SAOUHSC_02545  | YP_501008.1 | 3921134 |       | Uncharacterized protein                                                                                               | 127.9596 | -1.54664 | 0.197151 | -2.7727  | 0.005559 | 0.033077 | Cluster 1 |
| SAOUHSC_02890  | YP_501343.1 | 3921342 |       | Uncharacterized protein                                                                                               | 7.205414 | 2.648327 | 0.594501 | 2.772621 | 0.005561 | 0.033077 | Cluster 6 |
| SAOUHSC_01370  | YP_499897.1 | 3920779 | trpF  | N-(5'-phosphoribosyl)anthranilate isomerase (PRAI) (EC 5.3.1.24)                                                      | 14.13797 | 1.990376 | 0.357457 | 2.770617 | 0.005595 | 0.033203 | Cluster 6 |
| SAOUHSC_01647  | YP_500159.1 | 3920099 |       | Uncharacterized protein                                                                                               | 127.9358 | -1.46023 | 0.166637 | -2.76189 | 0.005747 | 0.033866 | Cluster 1 |
| SAOUHSC_01676  | YP_500186.1 | 3920087 |       | UPF0365 protein SAOUHSC_01676                                                                                         | 1874.009 | -1.62704 | 0.226975 | -2.7626  | 0.005734 | 0.033866 | Cluster 3 |
| SAOUHSC_03013  | YP_501462.1 | 3921494 | hisD  | Histidinol dehydrogenase (HDH) (EC 1.1.1.23)                                                                          | 91.14511 | 2.136278 | 0.411324 | 2.762491 | 0.005736 | 0.033866 | Cluster 4 |
| SAOUHSC_03020  | YP_501469.1 | 3921287 |       | UPF0397 protein SAOUHSC_03020                                                                                         | 89.57056 | 2.680687 | 0.608838 | 2.760482 | 0.005772 | 0.033933 | Cluster 6 |
| SAOUHSC_00174  | YP_498771.1 | 3919488 |       | M23/M37 peptidase domain protein                                                                                      | 83.66858 | 1.931861 | 0.337784 | 2.758752 | 0.005802 | 0.034035 | Cluster 4 |
| SAOUHSC_R0006  |             | 3921506 |       |                                                                                                                       | 67433.66 | 2.665009 | 0.604203 | 2.75571  | 0.005856 | 0.034194 | Cluster 4 |
| SAOUHSC_03017  | YP_501466.1 | 3921284 |       | Uncharacterized protein                                                                                               | 38.74323 | 2.82025  | 0.660404 | 2.756266 | 0.005847 | 0.034194 | Cluster 6 |
| SAOUHSC_00217  | YP_498812.1 | 3920293 |       | Sorbitol dehydrogenase, putative (EC 1.1.1.14)                                                                        | 73.69942 | 1.813161 | 0.29522  | 2.754421 | 0.00588  | 0.03425  | Cluster 6 |
| SAOUHSC_01387  | YP_499914.1 | 3920678 |       | Phosphate transport system permease protein                                                                           | 11.89852 | 2.771672 | 0.643655 | 2.752519 | 0.005914 | 0.034371 | Cluster 5 |
| SAOUHSC_01443  | YP_499968.1 | 3920224 |       | Uncharacterized protein                                                                                               | 3.598695 | 2.836538 | 0.669607 | 2.742711 | 0.006093 | 0.035333 | Cluster 6 |
| SAOUHSC_01054  | YP_499602.1 | 3921718 |       | UPF0637 protein SAOUHSC_01054                                                                                         | 88.60246 | 2.133882 | 0.413631 | 2.74129  | 0.00612  | 0.035406 | Cluster 5 |
| SAOUHSC_02584  | YP_501046.1 | 3921580 |       | Uncharacterized protein                                                                                               | 115.7779 | -1.44219 | 0.161527 | -2.73754 | 0.00619  | 0.03573  | Cluster 1 |
| SAOUHSC_T00017 |             | 3921336 |       |                                                                                                                       | 25.9067  | 2.815778 | 0.663588 | 2.736302 | 0.006213 | 0.035784 | Cluster 5 |
| SAOUHSC_02995  | YP_501444.1 | 3921477 |       | Uncharacterized protein                                                                                               | 71.5096  | 1.753331 | 0.275972 | 2.729736 | 0.006339 | 0.036421 | Cluster 6 |
| SAOUHSC_02932  | YP_501385.1 | 3921639 | betaA | Oxygen-dependent choline dehydrogenase (CDH) (CHD) (EC 1.1.99.1) (Betaine aldehyde dehydrogenase) (BADH) (EC 1.2.1.8) | 35.21533 | 2.938868 | 0.713565 | 2.717157 | 0.006585 | 0.037749 | Cluster 6 |
| SAOUHSC_01795  | YP_500299.1 | 3920436 | coaE  | Dephospho-CoA kinase (EC 2.7.1.24) (Dephosphocoenzyme A kinase)                                                       | 201.9352 | -1.62819 | 0.231447 | -2.71418 | 0.006644 | 0.038004 | Cluster 1 |
| SAOUHSC_01646  | YP_500158.1 | 3920098 |       | Glucokinase, putative                                                                                                 | 426.3916 | -1.40677 | 0.150262 | -2.70705 | 0.006788 | 0.038743 | Cluster 1 |
| SAOUHSC_02381  | YP_500858.1 | 3919424 |       | Uncharacterized protein                                                                                               | 2375.388 | 2.538359 | 0.568816 | 2.704492 | 0.006841 | 0.038955 | Cluster 4 |
| SAOUHSC_03016  | YP_501465.1 | 3921283 |       | Uncharacterized protein                                                                                               | 66.6626  | 2.384658 | 0.514048 | 2.693637 | 0.007068 | 0.040156 | Cluster 6 |
| SAOUHSC_02922  | YP_501374.1 | 3921373 | ldh2  | L-lactate dehydrogenase 2 (L-LDH 2) (EC 1.1.1.27)                                                                     | 389.7726 | -2.22131 | 0.454035 | -2.68991 | 0.007147 | 0.040517 | Cluster 2 |
| SAOUHSC_00812  | YP_499368.1 | 3919375 | clfA  | Clumping factor A (Fibrinogen receptor A) (Fibrinogen-binding protein A)                                              | 2093.811 | -1.93469 | 0.3489   | -2.67896 | 0.007385 | 0.041772 | Cluster 1 |
| SAOUHSC_01371  | YP_499898.1 | 3920780 | trpB  | Tryptophan synthase beta chain (EC 4.2.1.20)                                                                          | 30.25294 | 1.796774 | 0.298768 | 2.666863 | 0.007656 | 0.043209 | Cluster 6 |
| SAOUHSC_01276  | YP_499809.1 | 3919929 | glpK  | Glycerol kinase (EC 2.7.1.30) (ATP:glycerol 3-phosphotransferase) (Glycerokinase) (GK)                                | 145.5873 | 1.806639 | 0.302652 | 2.665237 | 0.007693 | 0.043322 | Cluster 6 |
| SAOUHSC_02910  | YP_501363.1 | 3921362 |       | Uncharacterized protein                                                                                               | 75.43386 | -1.72498 | 0.272798 | -2.65758 | 0.00787  | 0.04422  | Cluster 1 |
| SAOUHSC_02521  | YP_500986.1 | 3921112 |       | Uncharacterized protein                                                                                               | 42.80229 | 1.591139 | 0.222501 | 2.656791 | 0.007889 | 0.044226 | Cluster 6 |
| SAOUHSC_02937  | YP_501390.2 | 3921644 |       | Choline transporter, putative                                                                                         | 76.98837 | 2.99705  | 0.752142 | 2.655151 | 0.007927 | 0.044344 | Cluster 5 |
| SAOUHSC_02666  | YP_501128.1 | 3921228 |       | Uncharacterized protein                                                                                               | 27.74228 | 2.134048 | 0.42987  | 2.638116 | 0.008337 | 0.046532 | Cluster 6 |
| SAOUHSC_01320  | YP_499850.1 | 3920146 |       | Homoserine dehydrogenase (EC 1.1.1.3)                                                                                 | 1185.118 | 1.373212 | 0.141884 | 2.630396 | 0.008529 | 0.047497 | Cluster 6 |
| SAOUHSC_00356  | YP_498945.1 | 3921829 |       | Uncharacterized protein                                                                                               | 1085.723 | 2.108866 | 0.422277 | 2.62592  | 0.008642 | 0.048021 | Cluster 6 |
| SAOUHSC_02690  | YP_501152.1 | 3919709 |       | Uncharacterized protein                                                                                               | 54.42703 | 1.785093 | 0.29934  | 2.622748 | 0.008722 | 0.048364 | Cluster 6 |
| SAOUHSC_01002  | YP_499554.1 | 3920402 | qoxA  | Probable quinol oxidase subunit 2 (EC 1.10.3.-) (Quinol oxidase polypeptide II)                                       | 2398.562 | -1.92863 | 0.355191 | -2.61446 | 0.008937 | 0.049446 | Cluster 1 |

**S. aureus – 16 hpi vs. 1 hpi**

| Locus_id       | Protein_id  | Gene_id | Name | Description                                                                                                       | baseMean    | log2FoldChange | lfcSE       | stat        | pvalue      | padj        | Cluster   |
|----------------|-------------|---------|------|-------------------------------------------------------------------------------------------------------------------|-------------|----------------|-------------|-------------|-------------|-------------|-----------|
| SAOUHSC_00036  | YP_498642.1 | 3919304 |      | Uncharacterized protein                                                                                           | 645.3304841 | 4.209884625    | 0.240098733 | 13.36901945 | 9.17423E-41 | 2.32475E-37 | Cluster 4 |
| SAOUHSC_00898  | YP_499451.1 | 3921744 | argH | Argininosuccinate lyase (ASAL) (EC 4.3.2.1) (Arginosuccinase)                                                     | 560.8832089 | 3.188092393    | 0.198580721 | 11.01865468 | 3.10667E-28 | 3.93616E-25 | Cluster 4 |
| SAOUHSC_00173  | YP_498770.1 | 3919487 | azoR | FMN-dependent NADH-azoreductase (EC 1.7.1.17) (Azodye reductase) (FMN-dependent NADH-azo compound oxidoreductase) | 258.5358615 | 4.548861011    | 0.345973924 | 10.25759677 | 1.09395E-24 | 9.24026E-22 | Cluster 4 |
| SAOUHSC_00659  | YP_499217.1 | 3919949 |      | Uncharacterized protein                                                                                           | 1617.640665 | 2.58667356     | 0.161406165 | 9.830315724 | 8.3357E-23  | 5.28067E-20 | Cluster 4 |
| SAOUHSC_00035  | YP_498641.1 | 3919303 |      | Uncharacterized protein                                                                                           | 411.0784292 | 5.25361497     | 0.43811182  | 9.708971044 | 2.7611E-22  | 1.16611E-19 | Cluster 4 |
| SAOUHSC_00899  | YP_499452.1 | 3921745 | argG | Argininosuccinate synthase (EC 6.3.4.5) (Citrulline--aspartate ligase)                                            | 475.9186851 | 3.207543832    | 0.227019484 | 9.724028057 | 2.38169E-22 | 1.16611E-19 | Cluster 4 |
| SAOUHSC_00033  | YP_498639.1 | 3919301 |      | Probable membrane transporter protein                                                                             | 280.0107598 | 3.062243063    | 0.243725369 | 8.461339395 | 2.64324E-17 | 9.56853E-15 | Cluster 4 |
| SAOUHSC_01363  | YP_499890.1 | 3920068 |      | Uncharacterized protein                                                                                           | 385.186297  | 3.774935769    | 0.3410145   | 8.137295533 | 4.04205E-16 | 1.28032E-13 | Cluster 3 |
| SAOUHSC_03022  | YP_501471.1 | 3921289 |      | UPF0312 protein SAOUHSC_03022                                                                                     | 265.3923101 | 3.22754281     | 0.285207121 | 7.810263642 | 5.70685E-15 | 1.60679E-12 | Cluster 4 |
| SAOUHSC_00034  | YP_498640.1 | 3919302 |      | Uncharacterized protein                                                                                           | 131.1252476 | 3.434234962    | 0.317728517 | 7.661367585 | 1.83963E-14 | 4.66163E-12 | Cluster 4 |
| SAOUHSC_00437  | YP_499020.1 | 3919109 |      | Uncharacterized protein                                                                                           | 1198.814839 | 3.232721934    | 0.295076527 | 7.566586046 | 3.8316E-14  | 8.82662E-12 | Cluster 4 |
| SAOUHSC_02258  | YP_500740.1 | 3919678 |      | Uncharacterized protein                                                                                           | 383.6338158 | 3.010517417    | 0.270220452 | 7.440285884 | 1.00468E-13 | 2.12154E-11 | Cluster 4 |
| SAOUHSC_00561  | YP_499133.1 | 3920606 |      | Uncharacterized protein                                                                                           | 9001.938896 | 4.505946442    | 0.472611058 | 7.418248857 | 1.18679E-13 | 2.31333E-11 | Cluster 4 |
| SAOUHSC_00535  | YP_499107.1 | 3920815 |      | Uncharacterized epimerase/dehydratase SAOUHSC_00535                                                               | 601.6012902 | 3.130280903    | 0.297788304 | 7.15367552  | 8.44846E-13 | 1.52917E-10 | Cluster 3 |
| SAOUHSC_01262  | YP_499795.2 | 3919993 | recA | Protein RecA (Recombinase A)                                                                                      | 2059.139015 | 1.87351611     | 0.124073817 | 7.040293673 | 1.91835E-12 | 3.24073E-10 | Cluster 4 |
| SAOUHSC_02692  | YP_501154.1 | 3919711 |      | Antitoxin                                                                                                         | 134.3801745 | 2.783807421    | 0.276969913 | 6.44043752  | 1.1913E-10  | 1.88671E-08 | Cluster 4 |
| SAOUHSC_02691  | YP_501153.1 | 3919710 |      | Uncharacterized protein                                                                                           | 179.1619839 | 2.866734665    | 0.296404685 | 6.297925639 | 3.01655E-10 | 4.49644E-08 | Cluster 4 |
| SAOUHSC_02658  | YP_501120.1 | 3921220 |      | Membrane protein, putative                                                                                        | 444.844508  | -3.337245841   | 0.377582898 | 6.190020391 | 6.01564E-10 | 8.46869E-08 | Cluster 2 |
| SAOUHSC_01997  | YP_500494.1 | 3921877 | perR | Peroxide-responsive repressor PerR                                                                                | 1514.389332 | 2.110533128    | 0.181515323 | 6.118123319 | 9.46838E-10 | 1.26278E-07 | Cluster 3 |
| SAOUHSC_00037  | YP_498643.1 | 3919305 |      | Uncharacterized protein                                                                                           | 459.301566  | 2.034175826    | 0.17118985  | 6.041104806 | 1.53063E-09 | 1.9393E-07  | Cluster 4 |
| SAOUHSC_01365  | YP_499892.1 | 3920070 |      | Uncharacterized protein                                                                                           | 305.5337718 | 2.087020792    | 0.184666122 | 5.886411557 | 3.94671E-09 | 4.76236E-07 | Cluster 3 |
| SAOUHSC_01333  | YP_499863.1 | 3920198 | lexA | LexA repressor (EC 3.4.21.88)                                                                                     | 1149.072462 | 2.105087705    | 0.196231508 | 5.631550793 | 1.78596E-08 | 2.05711E-06 | Cluster 3 |
| SAOUHSC_00880  | YP_499433.1 | 3919227 |      | Uncharacterized protein                                                                                           | 359.4019252 | 1.874776792    | 0.157328823 | 5.560181376 | 2.69494E-08 | 2.96913E-06 | Cluster 4 |
| SAOUHSC_00319  | YP_498909.1 | 3919585 |      | Uncharacterized protein                                                                                           | 247.2955235 | 2.48692426     | 0.271550159 | 5.475689146 | 4.35812E-08 | 4.60145E-06 | Cluster 3 |
| SAOUHSC_02757  | YP_501216.1 | 3921629 |      | Antitoxin                                                                                                         | 411.1625427 | 2.488592404    | 0.279430754 | 5.327231809 | 9.97209E-08 | 1.01077E-05 | Cluster 4 |
| SAOUHSC_01389  | YP_499916.1 | 3920680 | pstS | Phosphate-binding protein PstS (PBP)                                                                              | 42.29841808 | 3.705151356    | 0.51848825  | 5.217382177 | 1.8147E-07  | 1.76863E-05 | Cluster 4 |
| SAOUHSC_00703  | YP_499262.1 | 3921007 |      | Quinolone resistance norA protein, putative                                                                       | 201.3623861 | -2.600771125   | 0.313169269 | -5.11152045 | 3.19576E-07 | 2.99928E-05 | Cluster 2 |
| SAOUHSC_02661  | YP_501123.1 | 3921223 |      | PTS system sucrose-specific IIBC component, putative (EC 2.7.1.69)                                                | 209.4228215 | 1.972312996    | 0.193831524 | 5.016278975 | 5.26818E-07 | 4.7677E-05  | Cluster 3 |
| SAOUHSC_R0004  |             | 3921504 |      |                                                                                                                   | 55386.13645 | 3.695922996    | 0.539536094 | 4.996742617 | 5.83068E-07 | 5.09481E-05 | Cluster 4 |
| SAOUHSC_00365  | YP_498954.1 | 3919784 | ahpC | Alkyl hydroperoxide reductase C (EC 1.11.1.15) (Peroxiredoxin) (Thioredoxin peroxidase)                           | 1471.220977 | 2.487885057    | 0.300891201 | 4.944927117 | 7.61724E-07 | 6.39536E-05 | Cluster 4 |
| SAOUHSC_R0002  |             | 3921502 |      |                                                                                                                   | 52568.75687 | 3.69511552     | 0.545601849 | 4.939711116 | 7.82384E-07 | 6.39536E-05 | Cluster 4 |
| SAOUHSC_R0003  |             | 3921503 |      |                                                                                                                   | 49318.74763 | 3.688095435    | 0.546954472 | 4.914660309 | 8.89365E-07 | 6.87406E-05 | Cluster 4 |
| SAOUHSC_R0005  |             | 3921505 |      |                                                                                                                   | 47135.17388 | 3.704730245    | 0.550482763 | 4.913378633 | 8.95202E-07 | 6.87406E-05 | Cluster 4 |
| SAOUHSC_R0001  |             | 3921501 |      |                                                                                                                   | 49146.54944 | 3.696992376    | 0.549617985 | 4.907030793 | 9.24655E-07 | 6.8914E-05  | Cluster 4 |
| SAOUHSC_00364  | YP_498953.1 | 3919783 | ahpF | Alkyl hydroperoxide reductase subunit F (EC 1.8.1.-)                                                              | 3968.768593 | 2.617324359    | 0.330147907 | 4.898787259 | 9.643E-07   | 6.98153E-05 | Cluster 4 |
| SAOUHSC_02756  | YP_501215.1 | 3921628 |      | Uncharacterized protein                                                                                           | 437.5758361 | 2.358322707    | 0.278027375 | 4.885571807 | 1.03129E-06 | 7.25914E-05 | Cluster 4 |
| SAOUHSC_01005  | YP_499556.1 | 3920404 |      | Uncharacterized protein                                                                                           | 383.7309431 | 2.61600221     | 0.333134594 | 4.850898816 | 1.22903E-06 | 8.41721E-05 | Cluster 3 |
| SAOUHSC_01121  | YP_499665.1 | 3920722 |      | alpha-hemolysin precursor                                                                                         | 497.734849  | 2.605274199    | 0.352416735 | 4.555045322 | 5.23743E-06 | 0.000349254 | Cluster 3 |
| SAOUHSC_02573  | YP_501034.1 | 3921570 |      | Na <sup>+</sup> /H <sup>+</sup> antiporter NhaC                                                                   | 199.3227813 | -2.333487394   | 0.295822898 | 4.507722031 | 6.55273E-06 | 0.00042576  | Cluster 6 |
| SAOUHSC_00318  | YP_498908.1 | 3919584 |      | Uncharacterized protein                                                                                           | 133.2303003 | 2.331486442    | 0.306853114 | 4.339165483 | 1.43025E-05 | 0.000906062 | Cluster 3 |
| SAOUHSC_02969  | YP_501419.1 | 3921670 | arcA | Arginine deiminase (ADI) (EC 3.5.3.6) (Arginine dihydrolase) (AD)                                                 | 32.40497061 | 3.255508491    | 0.520527575 | 4.33312009  | 1.47011E-05 | 0.000908599 | Cluster 3 |
| SAOUHSC_00320  | YP_498910.1 | 3919586 |      | NADPH-dependent FMN reductase, putative                                                                           | 129.8521784 | 2.356841039    | 0.315153064 | 4.30533983  | 1.6673E-05  | 0.001002586 | Cluster 3 |
| SAOUHSC_R0008  |             | 3921508 |      |                                                                                                                   | 69620.64689 | 3.558593307    | 0.594901723 | 4.300867196 | 1.70131E-05 | 0.001002586 | Cluster 4 |
| SAOUHSC_02388  | YP_500865.1 | 3919605 |      | Uncharacterized protein                                                                                           | 282.6875585 | 2.223808179    | 0.285076901 | 4.292905435 | 1.7635E-05  | 0.001015616 | Cluster 1 |
| SAOUHSC_00502  | YP_499075.1 | 3920414 | ctsR | Transcriptional regulator CtsR                                                                                    | 1530.909897 | 2.921469134    | 0.449984888 | 4.270074806 | 1.95407E-05 | 0.001100361 | Cluster 4 |
| SAOUHSC_R0007  |             | 3921507 |      |                                                                                                                   | 66576.61741 | 3.561888683    | 0.601083155 | 4.262120242 | 2.02496E-05 | 0.001115491 | Cluster 4 |
| SAOUHSC_R0006  |             | 3921506 |      |                                                                                                                   | 67433.66198 | 3.57185231     | 0.604214401 | 4.256522696 | 2.07631E-05 | 0.00111944  | Cluster 4 |
| SAOUHSC_R0009  |             | 3921509 |      |                                                                                                                   | 71300.89265 | 3.556547631    | 0.602510963 | 4.243155378 | 2.20399E-05 | 0.001163522 | Cluster 4 |
| SAOUHSC_R00010 |             | 3921510 |      |                                                                                                                   | 70828.02431 | 3.554002778    | 0.604272668 | 4.226573387 | 2.37277E-05 | 0.001204727 | Cluster 4 |
| SAOUHSC_02662  | YP_501124.1 | 3921224 |      | PTS system sucrose-specific IIBC component (EC 2.7.1.69)                                                          | 62.40374969 | 2.279170132    | 0.302679032 | 4.226160377 | 2.37713E-05 | 0.001204727 | Cluster 3 |
| SAOUHSC_00503  | YP_499076.1 | 3920415 | mcsA | Protein-arginine kinase activator protein                                                                         | 2357.781334 | 2.964605982    | 0.473659222 | 4.147720322 | 3.35802E-05 | 0.001638505 | Cluster 4 |
| SAOUHSC_02381  | YP_500858.1 | 3919424 |      | Uncharacterized protein                                                                                           | 2375.387884 | 3.361033358    | 0.569276992 | 4.147424524 | 3.36236E-05 | 0.001638505 | Cluster 4 |
| SAOUHSC_00313  | YP_498903.1 | 3919540 |      | Uncharacterized protein                                                                                           | 240.6852603 | -3.454628714   | 0.601789685 | 4.078881333 | 4.52529E-05 | 0.002163602 | Cluster 2 |
| SAOUHSC_02828  | YP_501287.1 | 3921267 |      | Uncharacterized protein                                                                                           | 90.8723175  | 2.296317197    | 0.32531102  | 3.984854849 | 6.75214E-05 | 0.003168504 | Cluster 3 |

|               |             |         |      |                                                                                                                         |             |              |             |             |             |             |           |
|---------------|-------------|---------|------|-------------------------------------------------------------------------------------------------------------------------|-------------|--------------|-------------|-------------|-------------|-------------|-----------|
| SAOUHSC_00310 | YP_498900.1 | 3919537 | ulaA | Uncharacterized protein                                                                                                 | 216.9817801 | -3.42591041  | 0.611448233 | 3.967482903 | 7.26357E-05 | 0.003346526 | Cluster 2 |
| SAOUHSC_00505 | YP_499078.1 | 3920417 | clpC | ATP-dependent Clp protease ATP-binding subunit ClpC                                                                     | 7349.920777 | 2.742751214  | 0.442656402 | 3.937029275 | 8.24965E-05 | 0.003732969 | Cluster 4 |
| SAOUHSC_00504 | YP_499077.1 | 3920416 | mcsB | Protein-arginine kinase (EC 2.7.14.1)                                                                                   | 3077.381024 | 2.866923099  | 0.475601829 | 3.925390914 | 8.6589E-05  | 0.003849413 | Cluster 4 |
| SAOUHSC_02872 | YP_501327.1 | 3921543 |      | Uncharacterized protein                                                                                                 | 310.2962172 | 3.269290676  | 0.588128452 | 3.85849497  | 0.000114087 | 0.00498444  | Cluster 4 |
| SAOUHSC_00927 | YP_499480.1 | 3920756 |      | Oligopeptide ABC transporter, substrate-binding protein, putative                                                       | 854.6636938 | -3.135553995 | 0.556847101 | 3.835081467 | 0.000125523 | 0.005391093 | Cluster 2 |
| SAOUHSC_01972 | YP_500469.1 | 3920448 | prsA | Foldase protein PrsA (EC 5.2.1.8)                                                                                       | 1193.009807 | 2.231521803  | 0.32369605  | 3.804562346 | 0.000142055 | 0.005999462 | Cluster 4 |
| SAOUHSC_00912 | YP_499465.1 | 3920799 | clpB | Chaperone protein ClpB                                                                                                  | 8776.310893 | 3.168265251  | 0.57416431  | 3.776384585 | 0.000159121 | 0.006610053 | Cluster 4 |
| SAOUHSC_00032 | YP_498638.1 | 3919300 |      | Uncharacterized protein                                                                                                 | 33.6156308  | 2.67299354   | 0.448320604 | 3.731690057 | 0.000190199 | 0.007773635 | Cluster 4 |
| SAOUHSC_00738 | YP_499298.1 | 3920983 |      | Uncharacterized protein                                                                                                 | 856.1955357 | -2.470331352 | 0.3948774   | 3.723513556 | 0.000196469 | 0.007778957 | Cluster 2 |
| SAOUHSC_00926 | YP_499479.1 | 3920813 |      | Oligopeptide ABC transporter, ATP-binding protein, putative                                                             | 456.0750262 | -3.124445348 | 0.570392495 | 3.724532433 | 0.000195678 | 0.007778957 | Cluster 2 |
| SAOUHSC_00934 | YP_499487.1 | 3920763 | spxA | Regulatory protein Spx                                                                                                  | 6561.84081  | 1.916051639  | 0.247130141 | 3.706758055 | 0.000209929 | 0.008184014 | Cluster 4 |
| SAOUHSC_00141 | YP_498740.1 | 3919849 |      | Uncharacterized protein                                                                                                 | 189.1047772 | 2.204731853  | 0.325489933 | 3.701287602 | 0.000214508 | 0.008235814 | Cluster 3 |
| SAOUHSC_01684 | YP_500194.1 | 3921796 | grpE | Protein GrpE (HSP-70 cofactor)                                                                                          | 5875.842759 | 3.011706604  | 0.546048292 | 3.684118485 | 0.000229495 | 0.008679724 | Cluster 4 |
| SAOUHSC_00881 | YP_499434.1 | 3919228 |      | Uncharacterized protein                                                                                                 | 170.6608336 | 1.825222703  | 0.225379213 | 3.661485426 | 0.000250757 | 0.009344391 | Cluster 3 |
| SAOUHSC_01683 | YP_500193.1 | 3921795 | dnaK | Chaperone protein DnaK (HSP70) (Heat shock 70 kDa protein) (Heat shock protein 70)                                      | 16075.21404 | 2.896963212  | 0.521412948 | 3.638120649 | 0.000274635 | 0.009941779 | Cluster 4 |
| SAOUHSC_01685 | YP_500195.1 | 3921797 | hrcA | Heat-inducible transcription repressor HrcA                                                                             | 6738.49447  | 3.00465431   | 0.550735197 | 3.639960401 | 0.00027268  | 0.009941779 | Cluster 4 |
| SAOUHSC_02452 | YP_500919.1 | 3919015 | lacD | Tagatose 1,6-diphosphate aldolase (EC 4.1.2.40) (D-tagatose-1,6-bisphosphate aldolase) (Tagatose-bisphosphate aldolase) | 34.63938198 | 2.508733157  | 0.424625386 | 3.553092226 | 0.000380731 | 0.013588342 | Cluster 4 |
| SAOUHSC_02595 | YP_501057.1 | 3921591 |      | Uncharacterized protein                                                                                                 | 148.3689377 | -3.053861602 | 0.587280409 | 3.497241812 | 0.000470096 | 0.01654475  | Cluster 6 |
| SAOUHSC_00935 | YP_499488.1 | 3920764 | mecA | Adapter protein MecA                                                                                                    | 1596.810727 | 1.46345548   | 0.13411367  | 3.455691585 | 0.000548883 | 0.019053006 | Cluster 3 |
| SAOUHSC_02883 | YP_501337.1 | 3921553 | ssaA | Staphylococcal secretory antigen SsaA                                                                                   | 82.82713299 | -3.850146866 | 0.835060131 | 3.413103751 | 0.000642275 | 0.021993574 | Cluster 6 |
| SAOUHSC_02454 | YP_500921.1 | 3919017 | lacB | Galactose-6-phosphate isomerase subunit LacB (EC 5.3.1.26)                                                              | 14.21593732 | 3.011823725  | 0.59223314  | 3.397013083 | 0.000681257 | 0.023017406 | Cluster 4 |
| SAOUHSC_02389 | YP_500866.1 | 3919606 |      | Cation efflux family protein, putative                                                                                  | 889.8649451 | 1.954826896  | 0.283088366 | 3.372893452 | 0.000743827 | 0.024800768 | Cluster 1 |
| SAOUHSC_00010 | YP_498618.1 | 3919183 |      | Uncharacterized protein                                                                                                 | 192.6291625 | -2.907576561 | 0.566898175 | 3.364936851 | 0.000765612 | 0.024872568 | Cluster 6 |
| SAOUHSC_02888 | YP_501341.1 | 3921557 |      | Uncharacterized protein                                                                                                 | 516.0139484 | -2.918863315 | 0.569970524 | 3.366600965 | 0.000761007 | 0.024872568 | Cluster 6 |
| SAOUHSC_02108 | YP_500600.1 | 3921180 | ftnA | Bacterial non-heme ferritin (EC 1.16.3.2)                                                                               | 744.5017834 | 2.86338007   | 0.554521161 | 3.360340779 | 0.000778464 | 0.024969968 | Cluster 4 |
| SAOUHSC_00233 | YP_498828.1 | 3920308 | lrgB | Antiholin-like protein LrgB                                                                                             | 177.2970696 | -2.816749617 | 0.542373442 | 3.349628646 | 0.0008092   | 0.0256314   | Cluster 2 |
| SAOUHSC_00373 | YP_498962.1 | 3919792 |      | Xanthine permease, putative                                                                                             | 402.4248002 | -2.264762019 | 0.381370522 | 3.316360198 | 0.000911982 | 0.028530401 | Cluster 6 |
| SAOUHSC_01364 | YP_499891.1 | 3920069 | tyrA | Prephenate dehydrogenase (PDH) (EC 1.3.1.12)                                                                            | 293.8611357 | 1.591248984  | 0.179230535 | 3.298818385 | 0.000970927 | 0.030004014 | Cluster 3 |
| SAOUHSC_01769 | YP_500274.1 | 3919687 |      | Uncharacterized protein                                                                                                 | 337.9245051 | 1.706651546  | 0.218216444 | 3.238305657 | 0.001202419 | 0.03671     | Cluster 3 |
| SAOUHSC_01761 | YP_500266.1 | 3920559 |      | Uncharacterized protein                                                                                                 | 682.2229466 | 2.955539182  | 0.612777567 | 3.19127084  | 0.001416484 | 0.042730609 | Cluster 3 |
| SAOUHSC_01760 | YP_500265.1 | 3920558 |      | Uncharacterized protein                                                                                                 | 330.7768048 | 2.952654097  | 0.615014702 | 3.17497141  | 0.001498513 | 0.044673306 | Cluster 3 |

**S. aureus – 16 hpi vs. inoculum**

| Locus_id       | Protein_id  | Gene_id | Name | Description | baseMean                                                                                                           | log2FoldChange | lfcSE | stat        | pvalue    | padj      | Cluster   |             |             |           |
|----------------|-------------|---------|------|-------------|--------------------------------------------------------------------------------------------------------------------|----------------|-------|-------------|-----------|-----------|-----------|-------------|-------------|-----------|
| SAOUHSC_00187  | YP_498784.1 | 391950  | 1    | pflB        | Formate acetyltransferase (EC 2.3.1.54) (Pyruvate formate-lyase)                                                   | 3453.9090      | 64    | 7.291625507 | -         | 0.3007924 | 20.916834 | 3.76275E-97 | 9.92991E-94 | Cluster 1 |
| SAOUHSC_00898  | YP_499451.1 | 392174  | 4    | argH        | Argininosuccinate lyase (ASAL) (EC 4.3.2.1) (Arginosuccinase)                                                      | 560.88320      | 89    | 4.789305211 | 0.1864828 | 20.319861 | 20.319861 | 8.58175E-92 | 1.13236E-88 | Cluster 4 |
| SAOUHSC_00899  | YP_499452.1 | 392174  | 5    | argG        | Argininosuccinate synthase (EC 6.3.4.5) (Citrulline--aspartate ligase)                                             | 475.91868      | 51    | 5.324502745 | 0.2157431 | 20.044685 | 20.044685 | 2.24597E-38 | 1.97571E-86 | Cluster 4 |
| SAOUHSC_001788 | YP_500293.1 | 392043  | 0    | thrS        | Threonine--tRNA ligase (EC 6.1.1.3) (Threonyl-tRNA synthetase) (ThrRS)                                             | 3281.6210      | 39    | 5.772818739 | -         | 0.2938925 | 16.240013 | 2.62868E-59 | 1.73427E-56 | Cluster 1 |
| SAOUHSC_00036  | YP_498642.1 | 391930  | 4    |             | Uncharacterized protein                                                                                            | 645.33048      | 41    | 4.542524684 | 0.2205713 | 16.060671 | 16.060671 | 4.81312E-58 | 2.54037E-55 | Cluster 4 |
| SAOUHSC_02582  | YP_501044.1 | 392157  | 8    |             | Putative formate dehydrogenase SAOUHSC_02582 (EC 1.17.1.9)                                                         | 3000.2656      | 37    | 2.953491274 | -         | 0.1275241 | 15.318600 | 5.74409E-65 | 2.52644E-50 | Cluster 1 |
| SAOUHSC_00608  | YP_499171.1 | 391892  | 7    | adh         | Alcohol dehydrogenase (ADH) (EC 1.1.1.1)                                                                           | 1667.4904      | 82    | -7.22113045 | 0.4296793 | 14.478541 | 14.478541 | 1.65573E-55 | 6.24211E-47 | Cluster 1 |
| SAOUHSC_00173  | YP_498770.1 | 391948  | 7    | azoR        | FMN-dependent NADH-azoreductase (EC 1.7.1.17) (Azo-dye reductase) (FMN-dependent NADH-azo compound oxidoreductase) | 258.53586      | 15    | 5.414821471 | 0.3072618 | 14.368270 | 14.368270 | 8.18494E-49 | 2.70001E-44 | Cluster 4 |
| SAOUHSC_00965  | YP_499518.1 | 392067  | 6    |             | Uncharacterized protein                                                                                            | 441.42068      | 21    | 3.089961932 | 0.1477394 | 14.146268 | 14.146268 | 1.96934E-52 | 5.77453E-43 | Cluster 5 |
| SAOUHSC_00033  | YP_498639.1 | 391930  | 1    |             | Probable membrane transporter protein                                                                              | 280.01075      | 98    | 3.956182168 | 0.2226808 | 13.275420 | 13.275420 | 3.21461E-66 | 8.48335E-63 | Cluster 4 |
| SAOUHSC_00188  | YP_498785.1 | 391950  | 2    | pflA        | Pyruvate formate-lyase-activating enzyme (PFL-activating enzyme) (EC 1.97.1.4)                                     | 1444.7626      | 65    | 7.456708203 | -         | 0.4991291 | 12.935945 | 2.82129E-98 | 6.76853E-98 | Cluster 1 |
| SAOUHSC_01450  | YP_499971.1 | 392022  | 7    |             | Uncharacterized protein                                                                                            | 1612.4788      | 06    | -8.19068736 | 0.5579825 | 12.886939 | 12.886939 | 5.33181E-51 | 1.17255E-38 | Cluster 1 |
| SAOUHSC_01389  | YP_499916.1 | 392068  | 0    | pstS        | Phosphate-binding protein PstS (PBP)                                                                               | 42.298418      | 08    | 8.014778491 | 0.5563123 | 12.609425 | 12.609425 | 1.87354E-44 | 3.80328E-36 | Cluster 4 |
| SAOUHSC_00034  | YP_498640.1 | 391930  | 2    |             | Uncharacterized protein                                                                                            | 131.12524      | 76    | 4.393238469 | 0.2764229 | 12.275532 | 12.275532 | 1.22583E-13 | 2.31068E-32 | Cluster 4 |
| SAOUHSC_01170  | YP_499709.1 | 392092  | 1    | carB        | Carbamoyl-phosphate synthase large chain (EC 6.3.5.5) (Carbamoyl-phosphate synthetase ammonia chain)               | 835.10163      | 22    | 4.332511245 | -         | 0.2793121 | 11.931136 | 8.14541E-46 | 1.43305E-30 | Cluster 1 |
| SAOUHSC_R0004  |             | 392150  | 4    |             |                                                                                                                    | 55386.136      |       | 7.211094616 | 0.5395135 | 11.512397 | 11.512397 | 1.14258E-85 | 1.88454E-30 | Cluster 4 |
| SAOUHSC_R0001  |             | 392150  | 1    |             |                                                                                                                    | 49146.549      | 44    | 7.182664294 | 0.5495920 | 11.249552 | 11.249552 | 2.32771E-44 | 3.61343E-29 | Cluster 4 |
| SAOUHSC_R0002  |             | 392150  | 2    |             |                                                                                                                    | 52568.756      | 87    | 7.084089414 | 0.5455740 | 11.151720 | 11.151720 | 7.02349E-52 | 1.02972E-26 | Cluster 4 |
| SAOUHSC_R0003  |             | 392150  | 3    |             |                                                                                                                    | 49318.747      | 63    | 7.075547334 | 0.5469250 | 11.108556 | 11.108556 | 1.13988E-2  | 1.58323E-28 | Cluster 4 |
| SAOUHSC_R0005  |             | 392150  | 5    |             |                                                                                                                    | 47135.173      | 88    | 7.101433817 | 0.5504521 | 11.084402 | 11.084402 | 1.49344E-97 | 1.97059E-28 | Cluster 4 |
| SAOUHSC_00035  | YP_498641.1 | 391930  | 3    |             | Uncharacterized protein                                                                                            | 411.07842      | 92    | 5.495095379 | 0.4060792 | 11.069503 | 11.069503 | 1.76375E-13 | 2.21644E-26 | Cluster 4 |
| SAOUHSC_02581  | YP_501043.1 | 392157  | 7    |             | Uncharacterized protein                                                                                            | 707.04860      | 18    | 3.241264979 | -         | 0.2052150 | 10.921541 | 9.09387E-69 | 1.09085E-28 | Cluster 1 |
| SAOUHSC_02648  | YP_501110.1 | 392121  | 0    |             | L-lactate permease                                                                                                 | 2186.0784      | 47    | 3.991687305 | -         | 0.2789320 | 10.725504 | 7.72641E-76 | 8.86521E-27 | Cluster 1 |
| SAOUHSC_02942  | YP_501394.1 | 392164  | 8    |             | Anaerobic ribonucleoside-triphosphate reductase, putative (EC 1.17.4.2)                                            | 643.49677      | 52    | 6.159314161 | -         | 0.4885862 | 10.559678 | 4.58226E-69 | 5.03858E-26 | Cluster 1 |
| SAOUHSC_01448  | YP_499970.1 | 392022  | 6    | norB        | Quinolone resistance protein NorB                                                                                  | 1179.5518      | 36    | 7.128835583 | -         | 0.5825294 | 10.521073 | 6.90817E-74 | 7.29227E-26 | Cluster 1 |
| SAOUHSC_00964  | YP_499517.1 | 392067  | 5    |             | Uncharacterized protein                                                                                            | 187.20781      | 54    | 3.14608899  | 0.2084936 | 10.293304 | 10.293304 | 7.55382E-76 | 7.66713E-25 | Cluster 5 |



|                |             |         |       |             |             |              |             |             |             |           |
|----------------|-------------|---------|-------|-------------|-------------|--------------|-------------|-------------|-------------|-----------|
| SAOUHSC_02255  | YP_500737.1 | 3919675 | groES | 1099.207829 | 5.621224666 | 0.458679614  | 10.07506007 | 7.12173E-24 | 6.96083E-22 | Cluster 4 |
| SAOUHSC_02941  | YP_501393.1 | 3921647 |       | 455.5980357 | 6.190400092 | -0.520143093 | 9.978792683 | 1.88749E-23 | 1.77896E-21 | Cluster 1 |
| SAOUHSC_01158  | YP_499698.1 | 3920716 |       | 422.6660128 | 2.363099291 | 0.137920148  | 9.883249886 | 4.92105E-23 | 4.47816E-21 | Cluster 5 |
| SAOUHSC_01889  | YP_500391.1 | 3920837 |       | 259.200404  | 3.788335484 | 0.283511711  | 9.834992264 | 7.95737E-23 | 6.99984E-21 | Cluster 5 |
| SAOUHSC_T00042 |             | 3921031 |       | 78.04391206 | 3.979507657 | 0.303411232  | 9.820030838 | 9.23153E-23 | 7.85871E-21 | Cluster 5 |
| SAOUHSC_01451  | YP_499972.1 | 3920228 | tdcB  | 609.8332947 | 7.821619972 | -0.697966249 | 9.773567109 | 1.46212E-22 | 1.20579E-20 | Cluster 1 |
| SAOUHSC_02887  | YP_501340.1 | 3921556 | isaA  | 1074.42361  | 3.976249852 | 0.306877479  | 9.698495519 | 3.05977E-22 | 2.44689E-20 | Cluster 5 |
| SAOUHSC_00206  | YP_498803.1 | 3920362 | ldh1  | 2101.398789 | 5.250718553 | -0.448471444 | 9.478236823 | 2.58616E-21 | 2.00731E-19 | Cluster 1 |
| SAOUHSC_02258  | YP_500740.1 | 3919678 |       | 383.6338158 | 3.34977833  | 0.255781654  | 9.186657026 | 4.05239E-20 | 3.0555E-18  | Cluster 4 |
| SAOUHSC_01262  | YP_499795.2 | 3919993 | recA  | 2059.139015 | 2.102605239 | 0.120682739  | 9.136395581 | 6.45685E-20 | 4.73323E-18 | Cluster 4 |
| SAOUHSC_02400  | YP_500876.1 | 3919615 |       | 382.8435125 | -5.02970666 | 0.441353795  | 9.130331961 | 6.82896E-20 | 4.84745E-18 | Cluster 1 |
| SAOUHSC_02757  | YP_501216.1 | 3921629 |       | 411.1625427 | 3.468137075 | 0.270392983  | 9.127962745 | 6.98004E-20 | 4.84745E-18 | Cluster 4 |
| SAOUHSC_00659  | YP_499217.1 | 3919949 |       | 1617.640665 | 2.411204277 | 0.156432694  | 9.021159476 | 1.86109E-19 | 1.25934E-17 | Cluster 4 |
| SAOUHSC_R0008  |             | 3921508 |       | 69620.64689 | 6.313845126 | 0.594874078  | 8.932722601 | 4.15651E-19 | 2.74226E-17 | Cluster 4 |
| SAOUHSC_00437  | YP_499020.1 | 3919109 |       | 1198.814839 | 3.5623794   | 0.290262328  | 8.827805599 | 1.06749E-18 | 6.87102E-17 | Cluster 4 |
| SAOUHSC_02756  | YP_501215.1 | 3921628 |       | 437.5758361 | 3.356980188 | 0.270087167  | 8.726738917 | 2.62121E-18 | 1.647E-16   | Cluster 4 |
| SAOUHSC_R0007  |             | 3921507 |       | 66576.61741 | 6.240411567 | 0.601053574  | 8.718709579 | 2.8139E-18  | 1.72695E-16 | Cluster 4 |
| SAOUHSC_03022  | YP_501471.1 | 3921289 |       | 265.3923101 | 3.27864183  | 0.262533694  | 8.679426243 | 3.9777E-18  | 2.38572E-16 | Cluster 4 |
| SAOUHSC_R0006  |             | 3921506 |       | 67433.66198 | 6.236861081 | 0.604185038  | 8.667644427 | 4.41152E-18 | 2.58711E-16 | Cluster 4 |
| SAOUHSC_02381  | YP_500858.1 | 3919424 |       | 2375.387884 | 5.899392433 | 0.568452343  | 8.618827057 | 6.76434E-18 | 3.88067E-16 | Cluster 4 |
| SAOUHSC_01327  | YP_499857.1 | 3920192 | katA  | 2026.604821 | 2.543174752 | 0.179457184  | 8.599124967 | 8.03262E-18 | 4.51023E-16 | #N/A      |
| SAOUHSC_01021  | YP_499570.1 | 3920281 |       | 846.8312136 | 4.360210915 | -0.392949293 | 8.551258325 | 1.21754E-17 | 6.69392E-16 | Cluster 1 |
| SAOUHSC_00561  | YP_499133.1 | 3920606 |       | 9001.938896 | 5.024771333 | 0.471778883  | 8.531054435 | 1.4502E-17  | 7.81035E-16 | Cluster 4 |
| SAOUHSC_02401  | YP_500877.1 | 3919616 |       | 367.9558937 | 3.774319079 | -0.327493486 | 8.471371782 | 2.4252E-17  | 1.28002E-15 | Cluster 1 |
| SAOUHSC_R0009  |             | 3921509 |       | 71300.89265 | 6.099594007 | 0.602481995  | 8.464309395 | 2.57675E-17 | 1.33334E-15 | Cluster 4 |
| SAOUHSC_R00010 |             | 3921510 |       | 70828.02431 | 6.112700779 | 0.604243842  | 8.461320454 | 2.64367E-17 | 1.34166E-15 | Cluster 4 |

|                |             |         |       |                                                                                                                                                                                                                                                                                                                                                                                                                                                                                                                                                             |             |              |             |             |             |             |           |
|----------------|-------------|---------|-------|-------------------------------------------------------------------------------------------------------------------------------------------------------------------------------------------------------------------------------------------------------------------------------------------------------------------------------------------------------------------------------------------------------------------------------------------------------------------------------------------------------------------------------------------------------------|-------------|--------------|-------------|-------------|-------------|-------------|-----------|
| SAOUHSC_02676  | YP_501138.1 | 3921238 | nreB  | Oxygen sensor histidine kinase NreB (EC 2.7.13.3) (Nitrogen regulation protein B)                                                                                                                                                                                                                                                                                                                                                                                                                                                                           | 422.1198357 | -3.258671078 | 0.267178347 | 8.453795392 | 2.81983E-17 | 1.40406E-15 | Cluster 1 |
| SAOUHSC_00699  | YP_499258.1 | 3921003 |       | Deoxyribodipyrimidine photolyase, putative (EC 4.1.99.3)                                                                                                                                                                                                                                                                                                                                                                                                                                                                                                    | 387.2192165 | -3.267764604 | 0.268359459 | 8.450473901 | 2.90123E-17 | 1.41784E-15 | Cluster 1 |
| SAOUHSC_00694  | YP_499253.1 | 3920998 |       | conserved hypothetical protein                                                                                                                                                                                                                                                                                                                                                                                                                                                                                                                              | 1498.578012 | 1.83718122   | 0.099436061 | 8.419291858 | 3.78767E-17 | 1.78494E-15 | Cluster 5 |
| SAOUHSC_02254  | YP_500736.1 | 3919674 | groEL | 60 kDa chaperone family promotes refolding of misfolded polypeptides especially under stressful conditions forms two stacked rings of heptamers to form a barrel-shaped 14mer ends can be capped by GroES misfolded proteins enter the barrel where they are refolded when GroES binds many bacteria have multiple copies of the groEL gene which are active under different environmental conditions the B.japonicum protein in this cluster is expressed constitutively in Rhodobacter Corynebacterium and Rhizobium this protein is essential for growth | 6220.093592 | 5.097591386  | 0.486585347 | 8.421115448 | 3.72917E-17 | 1.78494E-15 | Cluster 4 |
| SAOUHSC_01452  | YP_499973.1 | 3919897 | ald1  | Alanine dehydrogenase 1 (EC 1.4.1.1)                                                                                                                                                                                                                                                                                                                                                                                                                                                                                                                        | 347.9550163 | 7.987005738  | 0.834116112 | 8.376538512 | 5.45071E-17 | 2.52358E-15 | Cluster 1 |
| SAOUHSC_00174  | YP_498771.1 | 3919488 |       | M23/M37 peptidase domain protein                                                                                                                                                                                                                                                                                                                                                                                                                                                                                                                            | 83.6685762  | 3.952420646  | 0.354789482 | 8.321612652 | 8.67745E-17 | 3.94824E-15 | Cluster 4 |
| SAOUHSC_01063  | YP_499609.1 | 3921725 |       | Uncharacterized protein                                                                                                                                                                                                                                                                                                                                                                                                                                                                                                                                     | 295.2127897 | 2.371455248  | 0.166976153 | 8.213479727 | 2.14869E-16 | 9.61084E-15 | Cluster 5 |
| SAOUHSC_01394  | YP_499921.1 | 3920684 |       | Aspartokinase (EC 2.7.2.4)                                                                                                                                                                                                                                                                                                                                                                                                                                                                                                                                  | 1244.680427 | 4.516394268  | 0.42869965  | 8.202465913 | 2.35506E-16 | 1.03583E-14 | Cluster 4 |
| SAOUHSC_02606  | YP_501067.1 | 3921384 | hutI  | Imidazolonepropionase (EC 3.5.2.7) (Imidazolone-5-propionate hydrolase)                                                                                                                                                                                                                                                                                                                                                                                                                                                                                     | 289.3519664 | 4.295815297  | 0.404875444 | 8.140319064 | 3.94238E-16 | 1.70556E-14 | Cluster 1 |
| SAOUHSC_00330  | YP_498919.1 | 3919595 |       | Uncharacterized protein                                                                                                                                                                                                                                                                                                                                                                                                                                                                                                                                     | 69.58169408 | 3.842046935  | 0.35105286  | 8.095780614 | 5.68983E-16 | 2.42185E-14 | Cluster 5 |
| SAOUHSC_T00055 |             | 3921044 |       |                                                                                                                                                                                                                                                                                                                                                                                                                                                                                                                                                             | 79.92043684 | 3.180413173  | 0.270644867 | 8.056362551 | 7.85983E-16 | 3.29239E-14 | Cluster 5 |
| SAOUHSC_01022  | YP_499571.1 | 3920282 |       | Uncharacterized protein                                                                                                                                                                                                                                                                                                                                                                                                                                                                                                                                     | 322.3066625 | 4.599259915  | 0.451033211 | 7.980033021 | 1.46294E-15 | 6.03235E-14 | Cluster 1 |
| SAOUHSC_T00038 |             | 3921164 |       |                                                                                                                                                                                                                                                                                                                                                                                                                                                                                                                                                             | 50.99544624 | 4.171380271  | 0.398742203 | 7.953460336 | 1.81373E-15 | 7.36374E-14 | Cluster 5 |
| SAOUHSC_02781  | YP_501241.1 | 3921436 |       | Uncharacterized protein                                                                                                                                                                                                                                                                                                                                                                                                                                                                                                                                     | 244.7367433 | -5.16831203  | 0.52452276  | 7.946865887 | 1.91289E-15 | 7.64867E-14 | Cluster 1 |
| SAOUHSC_T00032 |             | 3921158 |       |                                                                                                                                                                                                                                                                                                                                                                                                                                                                                                                                                             | 95.21462325 | 3.281115876  | 0.291062971 | 7.837190229 | 4.6074E-15  | 1.81476E-13 | Cluster 5 |
| SAOUHSC_02742  | YP_501203.1 | 3921616 |       | Amino acid transporter, putative                                                                                                                                                                                                                                                                                                                                                                                                                                                                                                                            | 244.4065731 | 3.617460573  | 0.336926465 | 7.768640467 | 7.9333E-15  | 3.07882E-13 | Cluster 1 |
| SAOUHSC_01888  | YP_500390.1 | 3920836 |       | Riboflavin synthase, alpha subunit (EC 2.5.1.9)                                                                                                                                                                                                                                                                                                                                                                                                                                                                                                             | 132.0296318 | 3.177397255  | 0.281837882 | 7.725708276 | 1.11233E-14 | 4.19349E-13 | Cluster 5 |
| SAOUHSC_02877  | YP_501332.1 | 3921548 | crtN  | 4,4'-diapophytoene desaturase (4,4'-diaponeurosporene-forming) (EC 1.3.8.-) (Dehydrosqualene desaturase)                                                                                                                                                                                                                                                                                                                                                                                                                                                    | 339.0115394 | 3.388920744  | 0.309168834 | 7.726913192 | 1.10186E-14 | 4.19349E-13 | Cluster 1 |
| SAOUHSC_00880  | YP_499433.1 | 3919227 |       | Uncharacterized protein                                                                                                                                                                                                                                                                                                                                                                                                                                                                                                                                     | 359.4019252 | 2.093408365  | 0.142973334 | 7.647638427 | 2.04704E-14 | 7.52785E-13 | Cluster 4 |
| SAOUHSC_02680  | YP_501142.1 | 3921242 |       | Nitrate reductase, beta subunit (EC 1.7.99.4)                                                                                                                                                                                                                                                                                                                                                                                                                                                                                                               | 234.5113005 | -7.29274308  | 0.822880629 | 7.64721256  | 2.05383E-14 | 7.52785E-13 | Cluster 1 |
| SAOUHSC_02069  | YP_500562.1 | 3919756 |       | Phi PV83 orf 20-like protein                                                                                                                                                                                                                                                                                                                                                                                                                                                                                                                                | 13.03754976 | 8.095650293  | 0.930546414 | 7.625251342 | 2.43559E-14 | 8.80484E-13 | Cluster 5 |
| SAOUHSC_01041  | YP_499590.1 | 3919889 |       | Pyruvate dehydrogenase complex, E1 component, pyruvate dehydrogenase beta subunit, putative (EC 1.2.4.1)                                                                                                                                                                                                                                                                                                                                                                                                                                                    | 2175.360617 | 2.406939894  | 0.18474511  | 7.615573134 | 2.62524E-14 | 9.36217E-13 | Cluster 1 |
| SAOUHSC_00502  | YP_499075.1 | 3920414 | ctsR  | Transcriptional regulator CtsR                                                                                                                                                                                                                                                                                                                                                                                                                                                                                                                              | 1530.909897 | 4.398841261  | 0.448302352 | 7.581582481 | 3.41365E-14 | 1.20115E-12 | Cluster 4 |

|                |             |        |   |       |                                                                                                                                                                                              |             |             |             |             |             |             |           |
|----------------|-------------|--------|---|-------|----------------------------------------------------------------------------------------------------------------------------------------------------------------------------------------------|-------------|-------------|-------------|-------------|-------------|-------------|-----------|
| SAOUHSC_00500  | YP_499073.1 | 392041 | 2 | pdxT  | Pyridoxal 5'-phosphate synthase subunit PdxT (EC 4.3.3.6) (Pdx2) (Pyridoxal 5'-phosphate synthase glutaminase subunit) (EC 3.5.1.2)                                                          | 370.0934595 | -           | 0.284227015 | 7.503387482 | 6.21894E-14 | 2.15944E-12 | Cluster 1 |
| SAOUHSC_01172  | YP_499711.1 | 392092 | 3 | pyrE  | Orotate phosphoribosyltransferase (OPRT) (OPRTase) (EC 2.4.2.10)                                                                                                                             | 241.2461376 | -           | 0.42999293  | 7.499470784 | 6.4076E-14  | 2.19606E-12 | Cluster 1 |
| SAOUHSC_00037  | YP_498643.1 | 391930 | 5 |       | Uncharacterized protein                                                                                                                                                                      | 459.301566  | 2.192228614 | 0.159617891 | 7.469266824 | 8.06429E-14 | 2.69388E-12 | Cluster 4 |
| SAOUHSC_01040  | YP_499589.1 | 391988 | 8 | pdhA  | Pyruvate dehydrogenase E1 component subunit alpha (EC 1.2.4.1)                                                                                                                               | 2002.427025 | -           | 0.178722144 | 7.469596946 | 8.04408E-14 | 2.69388E-12 | Cluster 1 |
| SAOUHSC_01574  | YP_500089.1 | 392016 | 8 |       | Helix-turn-helix domain protein                                                                                                                                                              | 20.94457146 | 5.982350798 | 0.667638215 | 7.462650711 | 8.47989E-14 | 2.78845E-12 | Cluster 4 |
| SAOUHSC_02681  | YP_501143.1 | 392124 | 3 |       | Nitrate reductase, alpha subunit (EC 1.7.99.4)                                                                                                                                               | 313.2090376 | -           | 0.737866336 | 7.461432128 | 8.5587E-14  | 2.78845E-12 | Cluster 1 |
| SAOUHSC_00569  | YP_499138.1 | 392061 | 1 |       | Uncharacterized protein                                                                                                                                                                      | 1268.478725 | 2.149267684 | 0.155097335 | 7.409976991 | 1.26321E-13 | 4.06539E-12 | Cluster 5 |
| SAOUHSC_T00022 |             | 392114 | 8 |       |                                                                                                                                                                                              | 63.99701988 | 3.283087252 | 0.309533706 | 7.375892223 | 1.63248E-13 | 5.1905E-12  | Cluster 5 |
| SAOUHSC_01171  | YP_499710.1 | 392092 | 2 | pyrF  | Orotidine 5'-phosphate decarboxylase (EC 4.1.1.23) (OMP decarboxylase) (OMPDCase) (OMPDecase)                                                                                                | 224.6730257 | -           | 0.441570121 | 7.340318018 | 2.13087E-13 | 6.69448E-12 | Cluster 1 |
| SAOUHSC_01019  | YP_499569.1 | 392028 | 0 |       | Uncharacterized protein                                                                                                                                                                      | 445.92573   | -           | 0.50350145  | 7.32183975  | 2.44594E-13 | 7.50563E-12 | Cluster 1 |
| SAOUHSC_02467  | YP_500935.1 | 391903 | 0 |       | Alpha-acetolactate decarboxylase (EC 4.1.1.5)                                                                                                                                                | 296.6826607 | -           | 0.863264255 | 7.322115842 | 2.44091E-13 | 7.50563E-12 | Cluster 1 |
| SAOUHSC_T00026 |             | 392115 | 2 |       |                                                                                                                                                                                              | 98.20922998 | 3.468423737 | 0.338746756 | 7.286929528 | 3.17099E-13 | 9.61866E-12 | Cluster 5 |
| SAOUHSC_02468  | YP_500936.1 | 391903 | 1 |       | Acetolactate synthase, putative (EC 2.2.1.6)                                                                                                                                                 | 580.4930772 | -           | 0.510545621 | 7.243418113 | 4.37515E-13 | 1.31205E-11 | Cluster 1 |
| SAOUHSC_T0009  |             | 392132 | 8 |       |                                                                                                                                                                                              | 70.852366   | 3.455273155 | 0.340842015 | 7.203551929 | 5.86639E-13 | 1.73948E-11 | Cluster 5 |
| SAOUHSC_02770  | YP_501229.1 | 392142 | 5 |       | Uncharacterized protein                                                                                                                                                                      | 26.30339593 | 4.427204982 | 0.476802308 | 7.187895123 | 6.57978E-13 | 1.92934E-11 | Cluster 5 |
| SAOUHSC_03015  | YP_501464.1 | 392149 | 6 | hisZ  | ATP phosphoribosyltransferase regulatory subunit                                                                                                                                             | 97.88657742 | 4.415338122 | 0.476854988 | 7.162215361 | 7.93836E-13 | 2.30212E-11 | Cluster 4 |
| SAOUHSC_02452  | YP_500919.1 | 391901 | 5 | lacD  | Tagatose 1,6-diphosphate aldolase (EC 4.1.2.40) (D-tagatose-1,6-bisphosphate aldolase) (Tagatose-bisphosphate aldolase)                                                                      | 34.63938198 | 3.629220436 | 0.368811791 | 7.12889473  | 1.01178E-12 | 2.90227E-11 | Cluster 4 |
| SAOUHSC_T00033 |             | 392115 | 9 |       |                                                                                                                                                                                              | 85.13653836 | 3.080540147 | 0.292056409 | 7.123761307 | 1.05021E-12 | 2.98011E-11 | Cluster 5 |
| SAOUHSC_02607  | YP_501068.1 | 392138 | 5 | hutU  | Urocanate hydratase (Urocanase) (EC 4.2.1.49) (Imidazolonepropionate hydrolase)                                                                                                              | 375.1239097 | 4.712296365 | 0.521280653 | 7.121492698 | 1.06764E-12 | 2.99735E-11 | Cluster 1 |
| SAOUHSC_T00045 |             | 392103 | 4 |       |                                                                                                                                                                                              | 84.24058298 | 3.689135405 | 0.379450007 | 7.086929389 | 1.3712E-12  | 3.80906E-11 | Cluster 5 |
| SAOUHSC_00420  | YP_499005.1 | 392057 | 7 |       | Transporter                                                                                                                                                                                  | 187.1314183 | 3.335174925 | 0.329658048 | 7.083627828 | 1.40429E-12 | 3.86033E-11 | Cluster 5 |
| SAOUHSC_02589  | YP_501051.1 | 392158 | 5 |       | Uncharacterized protein                                                                                                                                                                      | 783.60849   | -2.55967295 | 0.221158885 | 7.052273521 | 1.76018E-12 | 4.78877E-11 | Cluster 1 |
| SAOUHSC_02710  | YP_501172.1 | 391972 | 9 | hlgB  | Gamma-hemolysin component B (H-gamma-1) (H-gamma-1) (Leukocidin f subunit)                                                                                                                   | 205.5472279 | 4.285544494 | 0.466776158 | 7.03880101  | 1.93901E-12 | 5.22148E-11 | Cluster 1 |
| SAOUHSC_00183  | YP_498780.1 | 391949 | 7 | uhpT  | Membrane protein, putative                                                                                                                                                                   | 136.6012116 | 2.731453416 | 0.248735482 | 6.961023013 | 3.37811E-12 | 8.91482E-11 | #N/A      |
| SAOUHSC_01887  | YP_500389.1 | 392083 | 5 | ribBA | Riboflavin biosynthesis protein RibBA [Includes: 3,4-dihydroxy-2-butanone 4-phosphate synthase (DHBP synthase) (EC 4.1.1.99.12); GTP cyclohydrolase-2 (EC 3.5.4.25) (GTP cyclohydrolase II)] | 245.3414198 | 3.05671427  | 0.295448739 | 6.961323557 | 3.37091E-12 | 8.91482E-11 | Cluster 5 |
| SAOUHSC_02881  | YP_501335.1 | 392155 | 1 |       | conserved hypothetical protein                                                                                                                                                               | 312.188641  | 3.485575906 | 0.357232675 | 6.957862706 | 3.45474E-12 | 9.02678E-11 | Cluster 2 |
| SAOUHSC_T00051 |             | 392104 | 0 |       |                                                                                                                                                                                              | 92.05049266 | 3.747092623 | 0.39544436  | 6.946849933 | 3.73533E-12 | 9.57041E-11 | Cluster 5 |
| SAOUHSC_02425  | YP_500896.1 | 391963 | 5 |       | UPF0457 protein SAOUHSC_02425                                                                                                                                                                | 203.7979786 | 3.781059055 | 0.400327555 | 6.94695886  | 3.73244E-12 | 9.57041E-11 | Cluster 4 |

|                   |             |             |      |                                                                                                                                      |                 |             |                   |                 |                 |                 |               |
|-------------------|-------------|-------------|------|--------------------------------------------------------------------------------------------------------------------------------------|-----------------|-------------|-------------------|-----------------|-----------------|-----------------|---------------|
| SAOUHSC_013<br>95 | YP_499922.1 | 392068<br>5 | asd  | Aspartate-semialdehyde<br>dehydrogenase (ASA dehydrogenase)<br>(ASADH) (EC 1.2.1.11) (Aspartate-beta-<br>semialdehyde dehydrogenase) | 1297.9236<br>96 | 4.032385806 | 0.4367260<br>03   | 6.9434514<br>74 | 3.82634E-<br>12 | 9.70934E-<br>11 | Clust<br>er 4 |
| SAOUHSC_005<br>03 | YP_499076.1 | 392041<br>5 | mcsA | Protein-arginine kinase activator<br>protein                                                                                         | 2357.7813<br>34 | 4.262381777 | 0.4725758<br>68   | 6.9034032<br>44 | 5.07712E-<br>12 | 1.27605E-<br>10 | Clust<br>er 4 |
| SAOUHSC_013<br>99 | YP_499926.1 | 392068<br>9 |      | Uncharacterized hydrolase<br>SAOUHSC_01399 (EC 3.-.-.-)                                                                              | 534.90375<br>72 | 3.71301494  | 0.3949185<br>47   | 6.8698088<br>7  | 6.4288E-<br>12  | 1.60053E-<br>10 | Clust<br>er 4 |
| SAOUHSC_015<br>73 | YP_500088.1 | 392016<br>7 |      | Conserved hypothetical phage protein                                                                                                 | 9.6055073<br>53 | 5.818702296 | 0.7027270<br>04   | 6.8571469<br>03 | 7.02494E-<br>12 | 1.7326E-<br>10  | #N/A          |
| SAOUHSC_016<br>84 | YP_500194.1 | 392179<br>6 | grpE | Protein GrpE (HSP-70 cofactor)                                                                                                       | 5875.8427<br>59 | 4.73956796  | 0.5457000<br>48   | 6.8527902<br>4  | 7.24232E-<br>12 | 1.76968E-<br>10 | Clust<br>er 4 |
| SAOUHSC_007<br>90 | YP_499347.1 | 391935<br>4 | clpP | ATP-dependent Clp protease<br>proteolytic subunit (EC 3.4.21.92)<br>(Endopeptidase Clp)                                              | 1494.4978<br>21 | 3.034729031 | 0.2976511<br>03   | 6.8359532<br>73 | 8.14615E-<br>12 | 1.97226E-<br>10 | #N/A          |
| SAOUHSC_026<br>92 | YP_501154.1 | 391971<br>1 |      | Antitoxin                                                                                                                            | 134.38017<br>45 | 2.655261961 | 0.2425122<br>54   | 6.8254776<br>07 | 8.76333E-<br>12 | 2.1024E-<br>10  | Clust<br>er 4 |
| SAOUHSC_026<br>84 | YP_501146.1 | 391970<br>3 |      | Assimilatory nitrite reductase<br>[NAD(P)H], large subunit, putative (EC<br>1.7.1.4)                                                 | 152.50176<br>22 | -4.94194969 | 0.5787010<br>82   | 6.8117199<br>23 | 9.64387E-<br>12 | 2.29281E-<br>10 | Clust<br>er 1 |
| SAOUHSC_026<br>87 | YP_501149.1 | 391970<br>6 |      | Formate/nitrite transporter, putative                                                                                                | 172.63704<br>33 | 4.328804093 | 0.4949263<br>27   | 6.7258577<br>99 | 1.74561E-<br>11 | 4.11309E-<br>10 | Clust<br>er 1 |
| SAOUHSC_026<br>91 | YP_501153.1 | 391971<br>0 |      | Uncharacterized protein                                                                                                              | 179.16198<br>39 | 2.812267374 | 0.2698416         | 6.7160414<br>5  | 1.86728E-<br>11 | 4.36084E-<br>10 | Clust<br>er 4 |
| SAOUHSC_016<br>85 | YP_500195.1 | 392179<br>7 | hrcA | Heat-inducible transcription repressor<br>HrcA                                                                                       | 6738.4944<br>7  | 4.685513689 | 0.5504337<br>61   | 6.6956534<br>12 | 2.1471E-<br>11  | 4.97035E-<br>10 | Clust<br>er 4 |
| SAOUHSC_026<br>78 | YP_501140.1 | 392124<br>0 |      | Respiratory nitrate reductase, gamma<br>subunit (EC 1.7.99.4)                                                                        | 183.98064<br>35 | -3.47980819 | 0.3707456<br>27   | 6.6887051<br>58 | 2.25154E-<br>11 | 5.16679E-<br>10 | Clust<br>er 1 |
| SAOUHSC_010<br>42 | YP_499591.1 | 391989<br>0 |      | Dihydrolipoamide acetyltransferase<br>component of pyruvate dehydrogenase<br>complex (EC 2.3.1.-)                                    | 2923.9921<br>31 | 2.219015805 | - 0.1829723<br>2  | 6.6622962<br>76 | 2.69582E-<br>11 | 6.13299E-<br>10 | Clust<br>er 1 |
| SAOUHSC_011<br>68 | YP_499707.1 | 392091<br>9 | pyrC | Dihydroorotase (DHOase) (EC 3.5.2.3)                                                                                                 | 339.06166<br>85 | 3.186488177 | - 0.3290698<br>2  | 6.6444506<br>48 | 3.0435E-<br>11  | 6.86478E-<br>10 | Clust<br>er 1 |
| SAOUHSC_001<br>32 | YP_498732.1 | 391984<br>1 | aldA | Putative aldehyde dehydrogenase AldA<br>(EC 1.2.1.3)                                                                                 | 842.61011<br>51 | 2.983648628 | 0.2994406<br>8    | 6.6245128<br>26 | 3.48395E-<br>11 | 7.79165E-<br>10 | Clust<br>er 4 |
| SAOUHSC_011<br>69 | YP_499708.1 | 392092<br>0 | carA | Carbamoyl-phosphate synthase small<br>chain (EC 6.3.5.5) (Carbamoyl-<br>phosphate synthetase glutamine chain)                        | 304.26004<br>92 | 3.590403215 | - 0.3916673<br>59 | 6.6137837<br>52 | 3.74619E-<br>11 | 8.30772E-<br>10 | Clust<br>er 1 |
| SAOUHSC_028<br>80 | YP_501334.1 | 392155<br>0 | crtQ | 4,4'-diaponeurosporenoate<br>glycosyltransferase (EC 2.4.1.-)                                                                        | 299.18573<br>95 | 3.912102271 | - 0.4411223<br>43 | 6.6015750<br>84 | 4.06812E-<br>11 | 8.94648E-<br>10 | Clust<br>er 2 |
| SAOUHSC_026<br>77 | YP_501139.1 | 392123<br>9 |      | Uncharacterized protein                                                                                                              | 247.28360<br>12 | 3.209115932 | - 0.3352433<br>11 | 6.5895898<br>9  | 4.41043E-<br>11 | 9.61911E-<br>10 | Clust<br>er 1 |
| SAOUHSC_030<br>14 | YP_501463.1 | 392149<br>5 | hisG | ATP phosphoribosyltransferase (ATP-<br>PRT) (ATP-PRTase) (EC 2.4.2.17)                                                               | 54.680896<br>11 | 4.128573884 | 0.4751121<br>38   | 6.5849167<br>75 | 4.5514E-<br>11  | 9.84521E-<br>10 | Clust<br>er 4 |
| SAOUHSC_002<br>04 | YP_498801.1 | 392036<br>0 |      | Globin domain protein                                                                                                                | 158.22954<br>52 | 4.175111588 | - 0.4827294<br>82 | 6.5774138<br>66 | 4.78701E-<br>11 | 1.02707E-<br>09 | Clust<br>er 1 |
| SAOUHSC_029<br>84 | YP_501433.1 | 392146<br>6 | gtfA | UDP-N-acetylglucosamine--peptide N-<br>acetylglucosaminyltransferase GtfA<br>subunit (EC 2.4.1.-)<br>(Glycosyltransferase GtfA)      | 444.10068<br>27 | 2.893987534 | - 0.2889467<br>74 | 6.5547973<br>07 | 5.57175E-<br>11 | 1.18579E-<br>09 | Clust<br>er 1 |
| SAOUHSC_026<br>75 | YP_501137.1 | 392123<br>7 | nreC | Oxygen regulatory protein NreC<br>(Nitrogen regulation protein C)                                                                    | 204.58790<br>9  | 3.307630752 | - 0.3526206<br>75 | 6.5442298<br>7  | 5.98028E-<br>11 | 1.26256E-<br>09 | Clust<br>er 1 |
| SAOUHSC_009<br>12 | YP_499465.1 | 392079<br>9 | clpB | Chaperone protein ClpB                                                                                                               | 8776.3108<br>93 | 4.744540429 | 0.5739174<br>69   | 6.5245277<br>04 | 6.82161E-<br>11 | 1.42875E-<br>09 | Clust<br>er 4 |
| SAOUHSC_016<br>83 | YP_500193.1 | 392179<br>5 | dnaK | Chaperone protein DnaK (HSP70) (Heat<br>shock 70 kDa protein) (Heat shock<br>protein 70)                                             | 16075.214<br>04 | 4.399621412 | 0.5212819<br>59   | 6.5216556<br>06 | 6.95355E-<br>11 | 1.44492E-<br>09 | Clust<br>er 4 |

|                    |             |             |      |                                                                                                               |                          |                  |                 |                 |                 |                 |           |
|--------------------|-------------|-------------|------|---------------------------------------------------------------------------------------------------------------|--------------------------|------------------|-----------------|-----------------|-----------------|-----------------|-----------|
| SAOUHSC_026<br>71  | YP_501133.1 | 392123<br>3 |      | conserved hypothetical protein                                                                                | 157.97850<br>11          | -<br>3.778660943 | 0.4279327<br>41 | 6.4932188<br>53 | 8.40215E-<br>11 | 1.73229E-<br>09 | Cluster 1 |
| SAOUHSC_027<br>41  | YP_501202.1 | 392161<br>5 |      | Amino acid ABC transporter, permease protein, putative                                                        | 205.43043<br>99          | -<br>3.486428086 | 0.3830481<br>57 | 6.4911631<br>63 | 8.51762E-<br>11 | 1.74248E-<br>09 | Cluster 1 |
| SAOUHSC_T00<br>039 |             | 392116<br>5 |      |                                                                                                               | 44.512750<br>62          |                  | 0.4104454<br>99 | 6.4682187<br>39 | 9.91649E-<br>11 | 2.01305E-<br>09 | Cluster 5 |
| SAOUHSC_013<br>61  | YP_499888.1 | 392006<br>6 | msrR | Regulatory protein MsrR                                                                                       | 154.60526<br>96          |                  | 0.2867782<br>72 | 6.4558515<br>66 | 1.07612E-<br>10 | 2.16785E-<br>09 | Cluster 5 |
| SAOUHSC_025<br>42  | YP_501005.1 | 392113<br>1 |      | Molybdopterin molybdenumtransferase (EC 2.10.1.1)                                                             | 219.46690<br>35          | -<br>3.191628722 | 0.3404669<br>8  | 6.4371256<br>32 | 1.21757E-<br>10 | 2.43422E-<br>09 | Cluster 1 |
| SAOUHSC_005<br>04  | YP_499077.1 | 392041<br>6 | mcsB | Protein-arginine kinase (EC 2.7.14.1)                                                                         | 3077.3810<br>24          |                  | 0.4748099<br>15 | 6.4041978<br>07 | 1.51162E-<br>10 | 2.99937E-<br>09 | Cluster 4 |
| SAOUHSC_T00<br>043 |             | 392103<br>2 |      |                                                                                                               | 40.740941<br>63          |                  | 0.3919875<br>82 | 6.2925386<br>48 | 3.12316E-<br>10 | 6.15075E-<br>09 | Cluster 5 |
| SAOUHSC_003<br>65  | YP_498954.1 | 391978<br>4 | ahpC | Alkyl hydroperoxide reductase C (EC 1.11.1.15) (Peroxiredoxin peroxidase)                                     | 1471.2209<br>77          |                  | 0.2983776<br>75 | 6.2734036<br>01 | 3.5324E-<br>10  | 6.81374E-<br>09 | Cluster 4 |
| SAOUHSC_026<br>79  | YP_501141.1 | 392124<br>1 |      | Respiratory nitrate reductase, delta subunit, putative                                                        | 101.72871<br>11          | -<br>6.349921557 | 0.8526861<br>89 | 6.2741975<br>03 | 3.51442E-<br>10 | 6.81374E-<br>09 | Cluster 1 |
| SAOUHSC_028<br>79  | YP_501333.1 | 392154<br>9 | crtM | 4,4'-diapophytoene synthase (DAP synthase) (EC 2.5.1.96) (C30 carotenoid synthase) (Dehydrosqualene synthase) | 193.03453<br>21          |                  | 0.3584076<br>28 | 6.2731896<br>72 | 3.53726E-<br>10 | 6.81374E-<br>09 | Cluster 1 |
| SAOUHSC_010<br>43  | YP_499592.1 | 391989<br>1 |      | Dihydrolipoyl dehydrogenase (EC 1.8.1.4)                                                                      | 2962.7820<br>69          |                  | 0.1858571<br>2  | 6.2424139<br>76 | 4.30869E-<br>10 | 8.23958E-<br>09 | Cluster 1 |
| SAOUHSC_019<br>72  | YP_500469.1 | 392044<br>8 | prsA | Foldase protein PrsA (EC 5.2.1.8)                                                                             | 1193.0098<br>07          |                  | 0.3213129<br>45 | 6.1336108<br>88 | 8.59065E-<br>10 | 1.63099E-<br>08 | Cluster 4 |
| SAOUHSC_000<br>60  | YP_498664.1 | 391909<br>1 |      | Uncharacterized protein                                                                                       | 259.16871<br>66          |                  | 0.2988901<br>26 | 6.1246927<br>88 | 9.08587E-<br>10 | 1.71269E-<br>08 | Cluster 5 |
| SAOUHSC_021<br>34  | YP_500624.1 | 392120<br>4 |      | Nitric oxide synthase oxygenase (EC 1.14.14.47)                                                               | 185.24636<br>04          |                  | 0.3246259<br>84 | 6.0957975<br>26 | 1.08893E-<br>09 | 2.03808E-<br>08 | Cluster 1 |
| SAOUHSC_003<br>67  | YP_498956.1 | 391978<br>6 |      | Uncharacterized protein                                                                                       | 345.03058<br>49          | -2.38058359      | 0.2305854<br>36 | 5.9872974<br>48 | 2.13356E-<br>09 | 3.96512E-<br>08 | Cluster 1 |
| SAOUHSC_011<br>56  | YP_499697.1 | 392071<br>5 |      | Uncharacterized protein                                                                                       | 208.60759<br>03          |                  | 0.2084304<br>67 | 5.9570113<br>96 | 2.56892E-<br>09 | 4.74083E-<br>08 | Cluster 5 |
| SAOUHSC_013<br>96  | YP_499923.1 | 392068<br>6 | dapA | 4-hydroxy-tetrahydronicotinate synthase (HTPA synthase) (EC 4.3.3.7)                                          | 1112.0660<br>85          |                  | 0.4314882<br>81 | 5.9491592<br>69 | 2.69523E-<br>09 | 4.93939E-<br>08 | #N/A      |
| SAOUHSC_026<br>82  | YP_501144.1 | 391970<br>1 |      | Uroporphyrin-III C-methyltransferase, putative (EC 2.1.1.107)                                                 | 121.81774<br>07          |                  | 0.7437066<br>52 | 5.9380246<br>77 | 2.88477E-<br>09 | 5.25027E-<br>08 | Cluster 1 |
| SAOUHSC_000<br>09  | YP_498617.1 | 391918<br>2 | serS | Serine--tRNA ligase (EC 6.1.1.11) (Seryl-tRNA synthetase) (SerRS) (Seryl-tRNA(Ser/Sec) synthetase)            | 594.90933<br>92          |                  | 0.3815712<br>12 | 5.9305068<br>96 | 3.02001E-<br>09 | 5.45877E-<br>08 | Cluster 2 |
| SAOUHSC_027<br>09  | YP_501171.1 | 391972<br>8 | hlgC | Gamma-hemolysin component C (Leukocidin s subunit)                                                            | 177.20581<br>91          |                  | 0.5802761<br>02 | 5.9185367<br>61 | 3.24818E-<br>09 | 5.83126E-<br>08 | Cluster 1 |
| SAOUHSC_T00<br>07  |             | 392132<br>6 |      |                                                                                                               | 55.897805<br>37          |                  | 0.4068465<br>32 | 5.9123400<br>52 | 3.37281E-<br>09 | 6.01409E-<br>08 | Cluster 5 |
| SAOUHSC_019<br>79  | YP_500476.1 | 392045<br>5 |      | Uncharacterized protein                                                                                       | 74.187767<br>3.482982974 |                  | 0.4205750<br>43 | 5.9037810<br>64 | 3.55264E-<br>09 | 6.29222E-<br>08 | Cluster 5 |
| SAOUHSC_024<br>53  | YP_500920.1 | 391901<br>6 | lacC | Tagatose-6-phosphate kinase (EC 2.7.1.144) (Phosphotagatokinase)                                              | 28.100478<br>83          |                  | 0.3831894<br>33 | 5.8707132<br>2  | 4.33924E-<br>09 | 7.63418E-<br>08 | #N/A      |
| SAOUHSC_001<br>13  | YP_498713.1 | 391982<br>2 |      | Aldehyde-alcohol dehydrogenase                                                                                | 366.87908<br>55          |                  | 0.6102437<br>54 | 5.8402996<br>22 | 5.2107E-<br>09  | 9.10665E-<br>08 | Cluster 1 |
| SAOUHSC_005<br>05  | YP_499078.1 | 392041<br>7 | clpC | ATP-dependent Clp protease ATP-binding subunit ClpC                                                           | 7349.9207<br>77          |                  | 0.4423044<br>11 | 5.8317166<br>73 | 5.486E-09       | 9.52471E-<br>08 | Cluster 4 |
| SAOUHSC_027<br>43  | YP_501204.1 | 392161<br>7 |      | Amino acid ABC transporter, permease protein, putative                                                        | 117.56465<br>25          |                  | 0.4672622<br>61 | 5.7965326<br>26 | 6.77E-09        | 1.16771E-<br>07 | Cluster 1 |

|                    |             |             |       |                                                                                                                                                                                        |                 |                  |                 |                 |                 |                 |               |
|--------------------|-------------|-------------|-------|----------------------------------------------------------------------------------------------------------------------------------------------------------------------------------------|-----------------|------------------|-----------------|-----------------|-----------------|-----------------|---------------|
| SAOUHSC_006<br>98  | YP_499257.1 | 392100<br>2 |       | Uncharacterized protein                                                                                                                                                                | 206.73313<br>79 | -<br>2.730021293 | 0.2987150<br>19 | 5.7915443<br>89 | 6.97421E-<br>09 | 1.19513E-<br>07 | Clust<br>er 1 |
| SAOUHSC_T00<br>019 |             | 392133<br>8 |       |                                                                                                                                                                                        | 54.278648<br>24 | 3.266304965      | 0.3916608<br>26 | 5.7863968<br>42 | 7.19122E-<br>09 | 1.22436E-<br>07 | Clust<br>er 5 |
| SAOUHSC_T00<br>034 |             | 392116<br>0 |       |                                                                                                                                                                                        | 11.078997<br>62 | 5.470713339      | 0.7765477<br>37 | 5.7571648<br>54 | 8.55384E-<br>09 | 1.44702E-<br>07 | Clust<br>er 5 |
| SAOUHSC_027<br>53  | YP_501212.1 | 392162<br>5 |       | Membrane protein, putative                                                                                                                                                             | 238.42992<br>86 | -<br>2.942470576 | 0.3398028<br>3  | 5.7164637<br>96 | 1.08764E-<br>08 | 1.8282E-<br>07  | Clust<br>er 1 |
| SAOUHSC_T00<br>024 |             | 392115<br>0 |       |                                                                                                                                                                                        | 73.984962<br>78 | 3.106299106      | 0.3685537<br>8  | 5.7150386<br>74 | 1.09679E-<br>08 | 1.83192E-<br>07 | Clust<br>er 5 |
| SAOUHSC_019<br>73  | YP_500470.1 | 392044<br>9 |       | Uncharacterized protein                                                                                                                                                                | 521.68322<br>42 | -<br>3.377977444 | 0.4166389<br>76 | 5.7075251<br>69 | 1.14631E-<br>08 | 1.90258E-<br>07 | Clust<br>er 1 |
| SAOUHSC_010<br>58  | YP_499605.1 | 392172<br>1 |       | GTP-binding protein TypA, putative                                                                                                                                                     | 375.89785<br>1  | 2.921049392      | 0.3366519<br>67 | 5.7063364<br>49 | 1.15434E-<br>08 | 1.90393E-<br>07 | Clust<br>er 5 |
| SAOUHSC_018<br>77  | YP_500380.1 | 392176<br>6 |       | Uncharacterized protein                                                                                                                                                                | 140.29761<br>4  | 2.323821439      | 0.2321431<br>97 | 5.7026070<br>76 | 1.17989E-<br>08 | 1.93399E-<br>07 | Clust<br>er 6 |
| SAOUHSC_T00<br>02  |             | 392151<br>8 |       |                                                                                                                                                                                        | 105.59663<br>73 | 3.242670348      | 0.3947033<br>97 | 5.6819129<br>59 | 1.33196E-<br>08 | 2.16979E-<br>07 | Clust<br>er 5 |
| SAOUHSC_026<br>83  | YP_501145.1 | 391970<br>2 |       | Assimilatory nitrite reductase [NAD(P)H], small subunit, putative (EC 1.7.1.4)                                                                                                         | 65.453804<br>96 | -5.95160733      | 0.8723233<br>06 | 5.6763441<br>91 | 1.37604E-<br>08 | 2.22783E-<br>07 | Clust<br>er 1 |
| SAOUHSC_024<br>49  | YP_500916.1 | 391901<br>2 | lacG  | 6-phospho-beta-galactosidase (EC 3.2.1.85) (Beta-D-phosphogalactoside galactohydrolase) (PGALase) (P-beta-Gal) (PBG)                                                                   | 59.723050<br>5  | 2.602858292      | 0.2845074<br>06 | 5.6338016<br>49 | 1.7628E-<br>08  | 2.8366E-<br>07  | Clust<br>er 1 |
| SAOUHSC_030<br>13  | YP_501462.1 | 392149<br>4 | hisD  | Histidinol dehydrogenase (HDH) (EC 1.1.1.23)                                                                                                                                           | 91.145109<br>17 | 3.458168434      | 0.4366983<br>41 | 5.6289850<br>58 | 1.81273E-<br>08 | 2.89927E-<br>07 | Clust<br>er 4 |
| SAOUHSC_013<br>97  | YP_499924.1 | 392068<br>7 | dapB  | 4-hydroxy-tetrahydrodipicolinate reductase (HTPA reductase) (EC 1.17.1.8)                                                                                                              | 959.53172<br>92 | 3.468235119      | 0.4399075<br>23 | 5.6108045<br>25 | 2.01388E-<br>08 | 3.20159E-<br>07 | Clust<br>er 1 |
| SAOUHSC_017<br>89  | YP_500294.1 | 392043<br>1 |       | Uncharacterized protein                                                                                                                                                                | 319.81972<br>29 | 2.854999438      | 0.3333908<br>08 | 5.5640390<br>78 | 2.63601E-<br>08 | 4.16553E-<br>07 | Clust<br>er 1 |
| SAOUHSC_029<br>85  | YP_501434.1 | 392146<br>7 | secA2 | Protein translocase subunit SecA 2                                                                                                                                                     | 463.89831<br>83 | 2.756051071      | 0.3158859<br>57 | 5.5591299<br>17 | 2.71123E-<br>08 | 4.25889E-<br>07 | Clust<br>er 1 |
| SAOUHSC_016<br>89  | YP_500199.1 | 392180<br>1 | rpsT  | 30S ribosomal protein S20                                                                                                                                                              | 114.04371<br>2  | 2.468993439      | 0.2648660<br>33 | 5.5461752<br>63 | 2.91986E-<br>08 | 4.55948E-<br>07 | Clust<br>er 5 |
| SAOUHSC_T00<br>030 |             | 392115<br>6 |       |                                                                                                                                                                                        | 48.532352<br>04 | 3.107699178      | 0.3812013<br>71 | 5.5290965<br>32 | 3.21884E-<br>08 | 4.99678E-<br>07 | Clust<br>er 5 |
| SAOUHSC_016<br>79  | YP_500189.1 | 392009<br>0 |       | Uncharacterized protein                                                                                                                                                                | 658.22669<br>33 | 2.621594573      | 0.2942432<br>17 | 5.5110686<br>69 | 3.56662E-<br>08 | 5.50427E-<br>07 | Clust<br>er 5 |
| SAOUHSC_013<br>98  | YP_499925.1 | 392068<br>8 | dapH  | 2,3,4,5-tetrahydropyridine-2,6-dicarboxylate N-acetyltransferase (EC 2.3.1.89) (Tetrahydrodipicolinate N-acetyltransferase) (THP acetyltransferase) (Tetrahydrodipicolinate acetylase) | 999.29150<br>39 | 3.408032376      | 0.4372148<br>3  | 5.5076639<br>94 | 3.63627E-<br>08 | 5.56204E-<br>07 | Clust<br>er 1 |
| SAOUHSC_022<br>94  | YP_500773.1 | 391916<br>6 |       | Uncharacterized protein                                                                                                                                                                | 10.551469<br>07 | 5.530907557      | 0.8227268<br>43 | 5.5071833<br>36 | 3.6462E-<br>08  | 5.56204E-<br>07 | Clust<br>er 5 |
| SAOUHSC_004<br>99  | YP_499072.1 | 392041<br>1 | pdxS  | Pyridoxal 5'-phosphate synthase subunit PdxS (PLP synthase subunit PdxS) (EC 4.3.3.6) (Pdx1)                                                                                           | 446.29461<br>57 | 2.579258024      | 0.2871984<br>51 | 5.4988389<br>36 | -<br>3.823E-08  | 5.79822E-<br>07 | Clust<br>er 1 |
| SAOUHSC_T00<br>041 |             | 392103<br>0 |       |                                                                                                                                                                                        | 102.11072<br>8  | 3.328030834      | 0.4251339<br>53 | 5.4759936<br>66 | 4.35063E-<br>08 | 6.56075E-<br>07 | Clust<br>er 5 |
| SAOUHSC_027<br>08  | YP_501170.1 | 391972<br>7 |       | Gamma-hemolysin h-gamma-ii subunit, putative                                                                                                                                           | 143.39260<br>04 | 4.009216216      | 0.5500991<br>29 | 5.4703162<br>75 | 4.49233E-<br>08 | 6.73595E-<br>07 | Clust<br>er 1 |
| SAOUHSC_010<br>09  | YP_499559.1 | 392027<br>0 | purK  | N5-carboxyaminoimidazole ribonucleotide synthase (N5-CAIR synthase) (EC 6.3.4.18) (5-(carboxyamino)imidazole ribonucleotide synthetase)                                                | 75.802175<br>62 | 2.854844083      | 0.3392631<br>42 | 5.4672726<br>1  | 4.57013E-<br>08 | 6.81388E-<br>07 | Clust<br>er 5 |
| SAOUHSC_014<br>00  | YP_499927.1 | 392069<br>0 |       | alanine racemase putative                                                                                                                                                              | 494.69763<br>92 | 3.148469352      | 0.3940913<br>26 | 5.4517042<br>3  | 4.98894E-<br>08 | 7.39652E-<br>07 | Clust<br>er 1 |
| SAOUHSC_009<br>13  | YP_499466.1 | 392080<br>0 |       | Uncharacterized protein                                                                                                                                                                | 26.481856<br>87 | 4.734360862      | 0.6865992<br>9  | 5.4389232<br>77 | 5.36035E-<br>08 | 7.85917E-<br>07 | Clust<br>er 5 |
| SAOUHSC_022<br>41  | YP_500725.1 | 391966<br>3 |       | Uncharacterized leukocidin-like protein                                                                                                                                                | 218.82479<br>11 | 4.641661384      | 0.6695563<br>92 | 5.4389166<br>12 | 5.36055E-<br>08 | 7.85917E-<br>07 | Clust<br>er 1 |
| SAOUHSC_T00<br>052 |             | 392104<br>1 |       |                                                                                                                                                                                        | 127.14579<br>8  | 3.202655869      | 0.4054302<br>21 | 5.4328852<br>55 | 5.54501E-<br>08 | 8.08468E-<br>07 | Clust<br>er 5 |

|                    |                    |                 |                                                                                                                                                       |                 |                  |                 |                 |                 |                 |               |
|--------------------|--------------------|-----------------|-------------------------------------------------------------------------------------------------------------------------------------------------------|-----------------|------------------|-----------------|-----------------|-----------------|-----------------|---------------|
| SAOUHSC_T00<br>012 | 392133<br>1        |                 |                                                                                                                                                       | 54.872414<br>68 | 2.887881221      | 0.3497963<br>45 | 5.3970867<br>6  | 6.77316E-<br>08 | 9.82109E-<br>07 | Clust<br>er 5 |
| SAOUHSC_023<br>45  | YP_500822.1<br>8   | 392096<br>atpA  | ATP synthase subunit alpha (EC 7.1.2.2)<br>(ATP synthase F1 sector subunit alpha)<br>(F-ATPase subunit alpha)                                         | 1960.7278<br>29 | -<br>2.162413041 | 0.2165631<br>66 | 5.3675473<br>14 | 7.98146E-<br>08 | 1.15099E-<br>06 | Clust<br>er 1 |
| SAOUHSC_003<br>64  | YP_498953.1<br>3   | 391978<br>ahpF  | Alkyl hydroperoxide reductase subunit<br>F (EC 1.8.1.-)                                                                                               | 3968.7685<br>93 | 2.749287566      | 0.3292151<br>18 | 5.3135092<br>27 | 1.07534E-<br>07 | 1.54229E-<br>06 | Clust<br>er 4 |
| SAOUHSC_009<br>34  | YP_499487.1<br>3   | 392076<br>spxA  | Regulatory protein Spx                                                                                                                                | 6561.8408<br>1  | 2.292406936      | 0.2466038<br>46 | 5.2408223<br>-  | 1.59863E-<br>07 | 2.28042E-<br>06 | Clust<br>er 4 |
| SAOUHSC_011<br>65  | YP_499705.1<br>7   | 392091          | Uracil permease, putative                                                                                                                             | 213.02500<br>13 | 2.615308497      | 0.3103512<br>61 | 5.2047750<br>48 | 1.94232E-<br>07 | 2.75579E-<br>06 | Clust<br>er 1 |
| SAOUHSC_T00<br>014 | 392133<br>3        |                 |                                                                                                                                                       | 66.793717<br>69 | 3.05604585       | 0.3958842<br>91 | 5.1935525<br>04 | 2.06319E-<br>07 | 2.91163E-<br>06 | Clust<br>er 5 |
| SAOUHSC_T00<br>035 | 392116<br>1        |                 |                                                                                                                                                       | 31.819452<br>6  | 3.323397922      | 0.4513176<br>04 | 5.1480330<br>11 | 2.63232E-<br>07 | 3.69505E-<br>06 | Clust<br>er 5 |
| SAOUHSC_029<br>83  | YP_501432.1<br>5   | 392146<br>gtfB  | UDP-N-acetylglucosamine--peptide N-<br>acetylglucosaminyltransferase<br>stabilizing protein GtfB<br>(Glycosyltransferase stabilizing protein<br>GtfB) | 402.72513<br>66 | -<br>2.401273516 | 0.2725652<br>15 | 5.1410577<br>68 | 2.73196E-<br>07 | 3.81463E-<br>06 | Clust<br>er 1 |
| SAOUHSC_017<br>61a | YP_0085302<br>42.1 | 168307<br>02    |                                                                                                                                                       | 90.795718<br>01 | 3.642917041      | 0.5155636<br>92 | 5.1262668<br>08 | 2.95544E-<br>07 | 4.10495E-<br>06 | #N/A          |
| SAOUHSC_018<br>95  | YP_500396.1<br>2   | 392084          | Uncharacterized protein                                                                                                                               | 502.77945<br>47 | 2.18134947       | 0.2306027<br>97 | 5.1228757<br>2  | 3.00911E-<br>07 | 4.15761E-<br>06 | Clust<br>er 5 |
| SAOUHSC_018<br>78  | YP_500381.1<br>7   | 392176          | Uncharacterized protein                                                                                                                               | 81.388821<br>41 | 2.335460599      | 0.2632433<br>89 | 5.0731021<br>39 | 3.91382E-<br>07 | 5.37947E-<br>06 | Clust<br>er 6 |
| SAOUHSC_010<br>08  | YP_499558.1<br>9   | 392026<br>purE  | N5-carboxyaminoimidazole<br>ribonucleotide mutase (N5-CAIR<br>mutase) (EC 5.4.99.18) (5-<br>(carboxyamino)imidazole<br>ribonucleotide mutase)         | 41.216703<br>31 | 3.377723124      | 0.4689676<br>26 | 5.0701220<br>95 | 3.97561E-<br>07 | 5.43607E-<br>06 | Clust<br>er 5 |
| SAOUHSC_023<br>41  | YP_500820.1<br>6   | 392096<br>atpD  | ATP synthase subunit beta (EC 7.1.2.2)<br>(ATP synthase F1 sector subunit beta)<br>(F-ATPase subunit beta)                                            | 2685.6507<br>76 | -<br>2.218275776 | 0.2411168<br>97 | 5.0526354<br>28 | 4.35755E-<br>07 | 5.92762E-<br>06 | #N/A          |
| SAOUHSC_024<br>03  | YP_500879.1<br>8   | 391961<br>mtlD  | Mannitol-1-phosphate 5-<br>dehydrogenase (EC 1.1.1.17)                                                                                                | 266.11377<br>57 | -<br>2.343032026 | 0.2659397<br>61 | 5.0501362<br>55 | 4.41495E-<br>07 | 5.9749E-<br>06  | Clust<br>er 1 |
| SAOUHSC_016<br>81  | YP_500191.1<br>3   | 392179<br>prmA  | Ribosomal protein L11<br>methyltransferase (L11 Mtase) (EC<br>2.1.1.-)                                                                                | 1475.9510<br>07 | 3.715040502      | 0.5379338<br>16 | 5.0471645<br>78 | 4.48415E-<br>07 | 6.03759E-<br>06 | #N/A          |
| SAOUHSC_029<br>30  | YP_501383.1<br>7   | 392163          | Uncharacterized protein                                                                                                                               | 92.400079<br>36 | 3.552090383      | 0.5076170<br>18 | 5.0275902<br>71 | 4.96682E-<br>07 | 6.65352E-<br>06 | Clust<br>er 1 |
| SAOUHSC_008<br>84  | YP_499437.1<br>1   | 391923<br>mnhF1 | Na(+)/H(+) antiporter subunit F1 (Mnh<br>complex subunit F1)                                                                                          | 255.95979<br>46 | -<br>2.411512171 | 0.2810916<br>85 | 5.0215365<br>58 | 5.12597E-<br>07 | 6.83204E-<br>06 | Clust<br>er 1 |
| SAOUHSC_016<br>82  | YP_500192.1<br>4   | 392179<br>dnaJ  | Chaperone protein DnaJ                                                                                                                                | 1770.8095<br>94 | 3.925350033      | 0.5863857<br>53 | 4.9887808<br>79 | 6.07615E-<br>07 | 8.05777E-<br>06 | #N/A          |
| SAOUHSC_011<br>73  | YP_499712.1<br>4   | 392092          | Uncharacterized protein                                                                                                                               | 86.113090<br>49 | -3.5819521       | 0.5182209<br>76 | 4.9823380<br>73 | 6.28206E-<br>07 | 8.24793E-<br>06 | Clust<br>er 1 |
| SAOUHSC_014<br>05  | YP_499932.1<br>5   | 392069          | Uncharacterized protein                                                                                                                               | 61.116139<br>97 | 2.799112033      | 0.3610931<br>28 | 4.9824045<br>16 | 6.2799E-<br>07  | 8.24793E-<br>06 | Clust<br>er 5 |
| SAOUHSC_000<br>32  | YP_498638.1<br>0   | 391930          | Uncharacterized protein                                                                                                                               | 33.615630<br>8  | 2.864743468      | 0.3779056<br>51 | 4.9344154<br>1  | 8.03912E-<br>07 | 1.05026E-<br>05 | Clust<br>er 4 |
| SAOUHSC_025<br>47  | YP_501010.1<br>6   | 392113          | Molybdenum transport system<br>permease                                                                                                               | 232.96043<br>88 | -<br>2.755237219 | 0.3592928<br>32 | 4.8852553<br>17 | 1.03295E-<br>06 | 1.34283E-<br>05 | Clust<br>er 1 |
| SAOUHSC_025<br>46  | YP_501009.1<br>5   | 392113          | Molybdenum transport ATP-binding<br>protein ModC, putative                                                                                            | 170.04591<br>39 | -<br>2.557310867 | 0.3188958<br>49 | 4.8834466<br>51 | 1.04247E-<br>06 | 1.34857E-<br>05 | Clust<br>er 1 |
| SAOUHSC_024<br>02  | YP_500878.1<br>7   | 391961          | PTS system, mannitol-specific Iia<br>component, putative (EC 2.7.1.69)                                                                                | 157.62494<br>23 | -<br>2.704210104 | 0.3505164<br>26 | 4.8619978<br>4  | 1.16207E-<br>06 | 1.49595E-<br>05 | Clust<br>er 1 |

|                    |             |             |       |                                                                                                   |                 |             |                 |                 |             |             |           |
|--------------------|-------------|-------------|-------|---------------------------------------------------------------------------------------------------|-----------------|-------------|-----------------|-----------------|-------------|-------------|-----------|
| SAOUHSC_011<br>66  | YP_499706.1 | 392091<br>8 | pyrB  | Aspartate carbamoyltransferase (EC 2.1.3.2) (Aspartate transcarbamylase) (ATCase)                 | 214.40371<br>3  | -2.78307376 | 0.3670879<br>33 | 4.8573477<br>95 | 1.18969E-06 | 1.52407E-05 | Cluster 1 |
| SAOUHSC_026<br>31  | YP_501092.1 | 392140<br>8 |       | Uncharacterized protein                                                                           | 64.647946<br>35 | 3.017116455 | 0.4194564<br>53 | 4.8088816<br>81 | 1.51777E-06 | 1.93497E-05 | Cluster 5 |
| SAOUHSC_013<br>87  | YP_499914.1 | 392067<br>8 |       | Phosphate transport system permease protein                                                       | 11.898518<br>32 | 4.368552912 | 0.7008433<br>43 | 4.8064277<br>76 | 1.53651E-06 | 1.94945E-05 | Cluster 5 |
| SAOUHSC_023<br>46  | YP_500823.1 | 391939<br>0 | atpH  | ATP synthase subunit delta (ATP synthase F(1) sector subunit delta) (F-type ATPase subunit delta) | 829.42737<br>47 | 2.013862223 | 0.2114413<br>12 | 4.7950053<br>46 | 1.6267E-06  | 2.05401E-05 | Cluster 1 |
| SAOUHSC_002<br>35  | YP_498830.1 | 391925<br>5 |       | Uncharacterized protein                                                                           | 31.882106<br>22 | 2.738657303 | 0.3632418<br>76 | 4.7865001<br>68 | 1.69715E-06 | 2.13275E-05 | #N/A      |
| SAOUHSC_002<br>29  | YP_498824.1 | 392030<br>4 | scdA  | Iron-sulfur cluster repair protein ScdA (Cell wall-related protein ScdA)                          | 83.451189<br>99 | 3.341824723 | 0.4900540<br>33 | 4.7787071<br>75 | 1.76426E-06 | 2.20658E-05 | Cluster 1 |
| SAOUHSC_022<br>43  | YP_500726.1 | 391966<br>4 |       | Uncharacterized leukocidin-like protein 2                                                         | 161.02155<br>52 | 4.092712045 | 0.6492578<br>34 | 4.7634574<br>21 | 1.90304E-06 | 2.36892E-05 | Cluster 1 |
| SAOUHSC_008<br>86  | YP_499439.1 | 391923<br>3 | mnhD1 | Na(+)/H(+) antiporter subunit D1 (Mnh complex subunit D1)                                         | 926.15510<br>08 | 2.181360546 | 0.2486412<br>44 | 4.7512654<br>31 | 2.02148E-06 | 2.50454E-05 | Cluster 1 |
| SAOUHSC_009<br>99  | YP_499551.1 | 392039<br>9 | qoxD  | Probable quinol oxidase subunit 4 (EC 1.10.3.-) (Quinol oxidase polypeptide IV)                   | 845.83325<br>76 | 2.753680489 | 0.3704159<br>89 | 4.7343541<br>86 | 2.19754E-06 | 2.70995E-05 | Cluster 1 |
| SAOUHSC_006<br>74  | YP_499233.1 | 391943<br>7 | sarX  | HTH-type transcriptional regulator SarX (Staphylococcal accessory regulator X)                    | 114.00049<br>37 | 4.054049098 | 0.6458067<br>26 | 4.7290450<br>48 | 2.25578E-06 | 2.76884E-05 | #N/A      |
| SAOUHSC_T00<br>061 |             | 392106<br>9 |       |                                                                                                   | 29.142365<br>16 | 4.236513857 | 0.6882458<br>36 | 4.7025549<br>38 | 2.56926E-06 | 3.12455E-05 | Cluster 5 |
| SAOUHSC_024<br>54  | YP_500921.1 | 391901<br>7 | lacB  | Galactose-6-phosphate isomerase subunit LacB (EC 5.3.1.26)                                        | 14.215937<br>32 | 3.203039732 | 0.4683979<br>98 | 4.7033500<br>16 | 2.55927E-06 | 3.12455E-05 | Cluster 4 |
| SAOUHSC_028<br>30  | YP_501289.1 | 392126<br>9 |       | D-lactate dehydrogenase, putative (EC 1.1.1.28)                                                   | 665.05476<br>6  | 2.795314966 | 0.3826424<br>3  | 4.6918867<br>97 | 2.70697E-06 | 3.27692E-05 | Cluster 1 |
| SAOUHSC_026<br>61  | YP_501123.1 | 392122<br>3 |       | PTS system sucrose-specific IIBC component, putative (EC 2.7.1.69)                                | 209.42282<br>15 | 1.809922335 | 0.1726812<br>7  | 4.6902732<br>22 | 2.7284E-06  | 3.28779E-05 | Cluster 3 |
| SAOUHSC_005<br>82  | YP_499149.1 | 392050<br>6 |       | Uncharacterized protein                                                                           | 22.386295<br>12 | 3.007950244 | 0.4283508<br>37 | 4.6876300<br>23 | 2.76387E-06 | 3.31539E-05 | Cluster 5 |
| SAOUHSC_010<br>01  | YP_499553.1 | 392040<br>1 | qoxB  | Probable quinol oxidase subunit 1 (EC 1.10.3.-) (Quinol oxidase polypeptide I)                    | 4950.8742<br>74 | 2.723343697 | 0.3706634<br>51 | 4.6493488<br>74 | 3.32985E-06 | 3.97623E-05 | Cluster 1 |
| SAOUHSC_019<br>74  | YP_500471.1 | 392045<br>0 |       | Uncharacterized protein                                                                           | 1125.0382<br>26 | 2.643940873 | 0.3543457<br>68 | 4.6393692<br>81 | 3.49474E-06 | 4.15433E-05 | #N/A      |
| SAOUHSC_T00<br>040 |             | 392102<br>9 |       |                                                                                                   | 92.647946<br>37 | 2.993281566 | 0.4303658<br>87 | 4.6315974<br>98 | 3.62855E-06 | 4.29406E-05 | Cluster 5 |
| SAOUHSC_030<br>35  | YP_501483.1 | 392130<br>1 |       | Uncharacterized protein                                                                           | 249.00092<br>23 | -2.83559169 | 0.3972535<br>26 | 4.6207058<br>48 | 3.82437E-06 | 4.50558E-05 | Cluster 1 |
| SAOUHSC_025<br>41  | YP_501004.1 | 392113<br>0 |       | Molybdopterin-guanine dinucleotide biosynthesis protein MobB                                      | 141.22669<br>76 | 2.506820402 | 0.3284703<br>19 | 4.5873867<br>96 | 4.48829E-06 | 5.26426E-05 | Cluster 1 |
| SAOUHSC_029<br>09  | YP_501362.1 | 392136<br>1 |       | Dihydroorotate dehydrogenase (quinone) (EC 1.3.5.2)                                               | 123.95188<br>11 | 2.624403282 | 0.3557505<br>32 | 4.5661303<br>48 | 4.9681E-06  | 5.80125E-05 | Cluster 1 |
| SAOUHSC_027<br>68  | YP_501227.1 | 392142<br>3 |       | Uncharacterized protein                                                                           | 20.498296<br>85 | 3.607486445 | 0.5782896<br>21 | 4.5090322<br>92 | 6.5124E-06  | 7.57102E-05 | Cluster 5 |
| SAOUHSC_006<br>63  | YP_499222.1 | 391995<br>3 |       | Uncharacterized protein                                                                           | 179.61692<br>53 | 2.243720527 | 0.2759490<br>16 | 4.5070663<br>67 | 6.57301E-06 | 7.60797E-05 | #N/A      |



|                |             |         |       |                                                                                                                               |             |              |             |             |             |             |           |
|----------------|-------------|---------|-------|-------------------------------------------------------------------------------------------------------------------------------|-------------|--------------|-------------|-------------|-------------|-------------|-----------|
| SAOUHSC_02343  | YP_500821.2 | 3920967 | atpG  | ATP synthase gamma chain (ATP synthase F1 sector gamma subunit) (F-ATPase gamma subunit)                                      | 1369.384702 | -2.277444488 | 0.284739878 | 4.48635609  | 7.24516E-06 | 8.34934E-05 | #N/A      |
| SAOUHSC_00560  | YP_499132.1 | 3920605 |       | Uncharacterized protein                                                                                                       | 202.0176328 | 3.611533532  | 0.584873098 | 4.465128486 | 8.00207E-06 | 9.18151E-05 | #N/A      |
| SAOUHSC_02922  | YP_501374.1 | 3921373 | ldh2  | L-lactate dehydrogenase 2 (L-LDH 2) (EC 1.1.1.27)                                                                             | 389.772626  | -3.279968027 | 0.51097354  | 4.462008007 | 8.11952E-06 | 9.27594E-05 | Cluster 2 |
| SAOUHSC_00233  | YP_498828.1 | 3920308 | lrgB  | Antiholin-like protein LrgB                                                                                                   | 177.2970696 | -3.401592963 | 0.538582922 | 4.459096019 | 8.2306E-06  | 9.36231E-05 | Cluster 2 |
| SAOUHSC_01401  | YP_499928.1 | 3920691 | lysA  | Diaminopimelate decarboxylase (DAP decarboxylase) (DAPDC) (EC 4.1.1.20)                                                       | 665.1050606 | -2.773642199 | 0.398241401 | 4.45368612  | 8.44085E-06 | 9.56026E-05 | #N/A      |
| SAOUHSC_02610  | YP_501071.1 | 3921388 | hutG  | Formimidoylglutamase (EC 3.5.3.8) (Formiminoglutamase) (Formiminoglutamate hydrolase)                                         | 499.0092962 | -2.403858879 | 0.31592438  | 4.443654775 | 8.84435E-06 | 9.97446E-05 | #N/A      |
| SAOUHSC_02347  | YP_500824.1 | 3919391 | atpF  | ATP synthase subunit b (ATP synthase F(0) sector subunit b) (ATPase subunit I) (F-type ATPase subunit b) (F-ATPase subunit b) | 937.9553611 | -1.824835013 | 0.185681866 | 4.442194761 | 8.90459E-06 | 9.99967E-05 | Cluster 1 |
| SAOUHSC_03008  | YP_501457.1 | 3921489 |       | imidazole glycerol phosphate synthase subunit hisFutative                                                                     | 125.9605007 | -2.20933041  | 0.275851079 | 4.383997387 | 1.16521E-05 | 0.000130296 | #N/A      |
| SAOUHSC_02289  | YP_500771.1 | 3919164 | ilvA  | L-threonine dehydratase biosynthetic IlvA (EC 4.3.1.19) (Threonine deaminase)                                                 | 346.9752442 | -2.802045208 | 0.411411951 | 4.380147941 | 1.18599E-05 | 0.00013206  | #N/A      |
| SAOUHSC_02872  | YP_501327.1 | 3921543 |       | Uncharacterized protein                                                                                                       | 310.2962172 | 3.526905249  | 0.579785268 | 4.358346772 | 1.31049E-05 | 0.00014531  | Cluster 4 |
| SAOUHSC_02785  | YP_501245.1 | 3921440 |       | Uncharacterized protein                                                                                                       | 79.11950817 | -3.242609501 | 0.514728875 | 4.356875256 | 1.31932E-05 | 0.000145678 | Cluster 1 |
| SAOUHSC_02135  | YP_500625.1 | 3921832 |       | Uncharacterized protein                                                                                                       | 135.8130508 | -2.723321709 | 0.396239366 | 4.349193587 | 1.36639E-05 | 0.000150246 | Cluster 1 |
| SAOUHSC_01991  | YP_500488.1 | 3921874 |       | ABC transporter, permease protein, putative                                                                                   | 151.3246684 | -2.539167601 | 0.35480352  | 4.338084357 | 1.4373E-05  | 0.000157387 | #N/A      |
| SAOUHSC_00888  | YP_499441.1 | 3921734 | mnhB1 | Na(+)/H(+) antiporter subunit B1 (Mnh complex subunit B1)                                                                     | 359.0910078 | -1.987062002 | 0.228211728 | 4.325202778 | 1.52392E-05 | 0.000166182 | Cluster 1 |
| SAOUHSC_01680  | YP_500190.1 | 3921792 |       | Ribosomal RNA small subunit methyltransferase E (EC 2.1.1.193)                                                                | 355.2488498 | -2.716066583 | 0.401262411 | 4.276669176 | 1.8971E-05  | 0.000206027 | #N/A      |
| SAOUHSC_01000  | YP_499552.1 | 3920400 | qoxC  | Probable quinol oxidase subunit 3 (EC 1.10.3.-) (Quinol oxidase polypeptide III)                                              | 2134.192898 | -2.723488532 | 0.404009569 | 4.265959684 | 1.99045E-05 | 0.000215278 | Cluster 1 |
| SAOUHSC_02350  | YP_500826.1 | 3919393 | atpB  | ATP synthase subunit a (ATP synthase F0 sector subunit a) (F-ATPase subunit 6)                                                | 1232.133976 | -1.828049254 | 0.194305016 | 4.261594849 | 2.02973E-05 | 0.000218631 | Cluster 1 |
| SAOUHSC_03012  | YP_501461.1 | 3921493 |       | Histidinol-phosphate aminotransferase, putative (EC 2.6.1.9)                                                                  | 75.61769661 | -2.893633148 | 0.444799089 | 4.257277484 | 2.06931E-05 | 0.00022109  | #N/A      |
| SAOUHSC_03046  | YP_501492.1 | 3921310 |       | Helix-turn-helix domain protein                                                                                               | 48.0454643  | -4.121099881 | 0.733099244 | 4.257404311 | 2.06814E-05 | 0.00022109  | Cluster 1 |
| SAOUHSC_T00036 |             | 3921162 |       |                                                                                                                               | 59.41984388 | 2.563790106  | 0.367616249 | 4.253865571 | 2.10111E-05 | 0.000223582 | Cluster 5 |
| SAOUHSC_00075  | YP_498675.1 | 3919453 | sbnA  | N-(2-amino-2-carboxyethyl)-L-glutamate synthase (ACEGA synthase) (EC 2.5.1.140) (Staphyloferrin B biosynthesis protein SbnA)  | 10.83603717 | 4.053301439  | 0.72176904  | 4.230302592 | 2.33377E-05 | 0.000247342 | Cluster 6 |
| SAOUHSC_01604  | YP_500119.1 | 3920020 |       | Uncharacterized protein                                                                                                       | 162.4692659 | -2.465787721 | 0.348134729 | 4.21040362  | 2.54915E-05 | 0.000269088 | #N/A      |
| SAOUHSC_02450  | YP_500917.1 | 3919013 |       | Pts system, lactose-specific IIBC component, putative                                                                         | 54.57906502 | -2.470056757 | 0.350381284 | 4.19559156  | 2.7216E-05  | 0.000286148 | #N/A      |
| SAOUHSC_00885  | YP_499438.1 | 3919232 | mnhE1 | Na(+)/H(+) antiporter subunit E1 (Mnh complex subunit E1)                                                                     | 399.9646394 | -1.966869988 | 0.230934701 | 4.186767881 | 2.82955E-05 | 0.000296317 | Cluster 1 |

|                   |             |             |       |                                                                                                                                                                                                                                                                                                     |                 |             |                 |                 |                 |                 |               |
|-------------------|-------------|-------------|-------|-----------------------------------------------------------------------------------------------------------------------------------------------------------------------------------------------------------------------------------------------------------------------------------------------------|-----------------|-------------|-----------------|-----------------|-----------------|-----------------|---------------|
| SAOUHSC_030<br>11 | YP_501460.1 | 392149<br>2 | hisB  | Imidazoleglycerol-phosphate<br>dehydratase (IGPD) (EC 4.2.1.19)                                                                                                                                                                                                                                     | 47.812665<br>68 | 2.554227202 | 0.3718337<br>76 | 4.1798978<br>49 | 2.9164E-<br>05  | 0.0003042<br>05 | #N/A          |
| SAOUHSC_013<br>64 | YP_499891.1 | 392006<br>9 | tyrA  | Prephenate dehydrogenase (PDH) (EC<br>1.3.1.12)                                                                                                                                                                                                                                                     | 293.86113<br>57 | 1.692738139 | 0.1658032<br>16 | 4.1780741<br>98 | 2.93988E-<br>05 | 0.0003054<br>46 | Clust<br>er 3 |
| SAOUHSC_016<br>34 | YP_500147.1 | 391997<br>1 | gcvT  | Aminomethyltransferase (EC 2.1.2.10)<br>(Glycine cleavage system T protein)                                                                                                                                                                                                                         | 165.97316<br>76 | 2.591225471 | 0.3833048<br>35 | 4.1513315<br>95 | 3.30546E-<br>05 | 0.0003420<br>83 | Clust<br>er 6 |
| SAOUHSC_002<br>62 | YP_498856.1 | 391920<br>4 | essC  | ESAT-6 secretion machinery protein<br>EssC                                                                                                                                                                                                                                                          | 82.010412<br>01 | 3.345147456 | 0.5661222<br>44 | 4.1424753<br>79 | 3.43577E-<br>05 | 0.0003541<br>8  | #N/A          |
| SAOUHSC_008<br>87 | YP_499440.1 | 391923<br>4 | mnhC1 | Na(+)/H(+) antiporter subunit C1 (Mnh<br>complex subunit C1)                                                                                                                                                                                                                                        | 327.48220<br>28 | 2.085643033 | 0.2623105<br>08 | 4.1387706<br>54 | 3.49172E-<br>05 | 0.0003584<br>11 | Clust<br>er 1 |
| SAOUHSC_015<br>04 | YP_500022.1 | 391904<br>7 |       | Ferredoxin, putative                                                                                                                                                                                                                                                                                | 163.47341<br>81 | 3.374818674 | 0.5739095<br>98 | 4.1379664<br>75 | 3.50398E-<br>05 | 0.0003584<br>11 | Clust<br>er 5 |
| SAOUHSC_010<br>12 | YP_499562.1 | 392027<br>3 | purQ  | Phosphoribosylformylglycinamide<br>synthase subunit PurQ (FGAM<br>synthase) (EC 6.3.5.3)<br>(Formylglycinamide ribonucleotide<br>amidotransferase subunit I) (FGAR<br>amidotransferase I) (FGAR-AT I)<br>(Glutaminase PurQ) (EC 3.5.1.2)<br>(Phosphoribosylformylglycinamide<br>synthase subunit I) | 46.498951<br>18 | 2.271101069 | 0.3084148<br>45 | 4.1214004<br>06 | 3.76576E-<br>05 | 0.0003837<br>01 | Clust<br>er 5 |
| SAOUHSC_012<br>64 | YP_499797.1 | 391991<br>7 |       | Uncharacterized protein                                                                                                                                                                                                                                                                             | 21.207162<br>59 | 2.898522026 | 0.4612409<br>24 | 4.1161173<br>09 | 3.85307E-<br>05 | 0.0003888<br>47 | #N/A          |
| SAOUHSC_016<br>46 | YP_500158.1 | 392009<br>8 |       | Glucokinase, putative                                                                                                                                                                                                                                                                               | 426.39161<br>47 | 1.874479077 | 0.2124411<br>34 | 4.1163359<br>49 | 3.84943E-<br>05 | 0.0003888<br>47 | Clust<br>er 1 |
| SAOUHSC_028<br>28 | YP_501287.1 | 392126<br>7 |       | Uncharacterized protein                                                                                                                                                                                                                                                                             | 90.872317<br>5  | 2.19821636  | 0.2911348<br>08 | 4.1156753<br>76 | 3.86047E-<br>05 | 0.0003888<br>47 | Clust<br>er 3 |
| SAOUHSC_024<br>55 | YP_500922.1 | 391901<br>8 | lacA  | Galactose-6-phosphate isomerase<br>subunit LacA (EC 5.3.1.26)                                                                                                                                                                                                                                       | 13.531993<br>68 | 3.512580792 | 0.6111347<br>23 | 4.1113369<br>86 | 3.93375E-<br>05 | 0.0003947<br>21 | #N/A          |
| SAOUHSC_010<br>84 | YP_499629.1 | 391924<br>5 |       | Uncharacterized protein                                                                                                                                                                                                                                                                             | 51.031688<br>76 | 3.379696619 | 0.5807152<br>44 | 4.0978717<br>96 | 4.16966E-<br>05 | 0.0004168<br>08 | Clust<br>er 5 |
| SAOUHSC_017<br>94 | YP_500298.1 | 392043<br>5 |       | Glyceraldehyde-3-phosphate<br>dehydrogenase (EC 1.2.1.-)                                                                                                                                                                                                                                            | 694.40262<br>41 | 2.342588109 | 0.3285419<br>86 | 4.0865039<br>86 | 4.37922E-<br>05 | 0.0004361<br>04 | #N/A          |
| SAOUHSC_T00<br>03 |             | 392132<br>2 |       |                                                                                                                                                                                                                                                                                                     | 16.466483<br>25 | 4.142042015 | 0.7734645<br>59 | 4.0622960<br>41 | 4.85924E-<br>05 | 0.0004820<br>88 | #N/A          |
| SAOUHSC_030<br>47 | YP_501493.1 | 392131<br>1 |       | Uncharacterized protein                                                                                                                                                                                                                                                                             | 33.606848<br>8  | 4.327068414 | 0.8204740<br>63 | 4.0550561<br>72 | 5.01223E-<br>05 | 0.0004954<br>03 | Clust<br>er 1 |
| SAOUHSC_007<br>98 | YP_499354.1 | 391936<br>1 | gpml  | 2,3-bisphosphoglycerate-independent<br>phosphoglycerate mutase (BPG-<br>independent PGAM)<br>(Phosphoglyceromutase) (iPGM) (EC<br>5.4.2.12)                                                                                                                                                         | 1917.8695<br>73 | 2.052801294 | 0.2607353<br>63 | 4.0378155<br>08 | 5.39513E-<br>05 | 0.0005312<br>59 | Clust<br>er 1 |
| SAOUHSC_007<br>15 | YP_499274.1 | 391934<br>2 | saeR  | Response regulator SaeR<br>(Staphylococcus exoprotein expression<br>protein R)                                                                                                                                                                                                                      | 496.93992<br>28 | 2.045664517 | 0.2591705<br>36 | 4.0346581<br>54 | 5.46818E-<br>05 | 0.0005364<br>51 | #N/A          |
| SAOUHSC_005<br>40 | YP_499112.1 | 392082<br>0 |       | Uncharacterized protein                                                                                                                                                                                                                                                                             | 34.752354<br>5  | 2.72753019  | 0.4304560<br>85 | 4.0132553<br>64 | 5.98871E-<br>05 | 0.0005831<br>81 | Clust<br>er 5 |
| SAOUHSC_029<br>72 | YP_501423.1 | 392167<br>3 | isaB  | Immunodominant staphylococcal<br>antigen B                                                                                                                                                                                                                                                          | 245.75559<br>43 | 2.717637109 | 0.4279614<br>19 | 4.0135326<br>08 | 5.98167E-<br>05 | 0.0005831<br>81 | Clust<br>er 1 |
| SAOUHSC_013<br>85 | YP_499912.1 | 392079<br>4 | pstB  | Phosphate import ATP-binding protein<br>PstB (EC 7.3.2.1) (ABC phosphate<br>transporter) (Phosphate-transporting<br>ATPase)                                                                                                                                                                         | 15.35395<br>15  | 3.296862081 | 0.5733066<br>01 | 4.0063415<br>94 | 6.16664E-<br>05 | 0.0005983<br>01 | #N/A          |
| SAOUHSC_018<br>50 | YP_500354.1 | 392052<br>8 |       | Catabolite control protein A                                                                                                                                                                                                                                                                        | 714.34188<br>24 | 1.867728617 | 0.2171884<br>42 | 3.9952799<br>01 | 6.46179E-<br>05 | 0.0006246<br>39 | #N/A          |
| SAOUHSC_002<br>32 | YP_498827.1 | 392030<br>7 | lrgA  | Antiholin-like protein LrgA                                                                                                                                                                                                                                                                         | 62.810327<br>07 | 3.844083621 | 0.7130744<br>81 | 3.9884804<br>41 | 6.64979E-<br>05 | 0.0006404<br>67 | #N/A          |
| SAOUHSC_021<br>71 | YP_500658.1 | 392186<br>5 |       | Staphylokinase, putative                                                                                                                                                                                                                                                                            | 88.530201<br>16 | -3.63390298 | 0.6616368<br>59 | 3.9808891<br>31 | 6.8658E-<br>05  | 0.0006573<br>7  | Clust<br>er 1 |

|                    |             |             |       |                                                                                 |                 |                  |                 |                 |                 |                 |               |
|--------------------|-------------|-------------|-------|---------------------------------------------------------------------------------|-----------------|------------------|-----------------|-----------------|-----------------|-----------------|---------------|
| SAOUHSC_028<br>82  | YP_501336.1 | 392155<br>2 | crtO  | Glycosyl-4,4'-diaponeurosporenoate acyltransferase (EC 2.3.1.-)                 | 64.141256<br>67 | -<br>3.456857084 | 0.6172128<br>38 | 3.9805670<br>47 | 6.87511E-<br>05 | 0.0006573<br>7  | #N/A          |
| SAOUHSC_003<br>28  | YP_498917.1 | 391959<br>3 | tatC  | Sec-independent protein translocase protein TatC                                | 80.769527<br>15 | 2.508284674      | 0.3797289<br>26 | 3.9720036<br>36 | 7.12706E-<br>05 | 0.0006790<br>01 | Clust<br>er 6 |
| SAOUHSC_002<br>84  | YP_498875.1 | 391896<br>7 |       | 5'-nucleotidase, lipoprotein e(P4) family                                       | 44.477880<br>8  | 4.525061153      | 0.8897603<br>68 | 3.9618095<br>86 | 7.43839E-<br>05 | 0.0007061<br>11 | #N/A          |
| SAOUHSC_000<br>49  | YP_498654.1 | 391908<br>1 |       | Uncharacterized protein                                                         | 121.60056<br>23 | 3.228096986      | 0.5633001<br>13 | 3.9554350<br>07 | 7.63955E-<br>05 | 0.0007226<br>08 | #N/A          |
| SAOUHSC_013<br>36  | YP_499865.1 | 392020<br>0 |       | UPF0291 protein SAOUHSC_01336                                                   | 81.183221<br>35 | 2.374445388      | 0.3482855<br>71 | 3.9463173<br>38 | 7.93624E-<br>05 | 0.0007479<br>91 | Clust<br>er 4 |
| SAOUHSC_013<br>28  | YP_499858.1 | 392019<br>3 | rpmG1 | 50S ribosomal protein L33 1                                                     | 320.55675<br>02 | 2.149354297      | 0.2915277<br>73 | 3.9425207<br>62 | 8.06297E-<br>05 | 0.0007572<br>3  | #N/A          |
| SAOUHSC_006<br>39  | YP_499199.1 | 392004<br>7 |       | Uncharacterized protein                                                         | 116.95925<br>26 | 2.139977521      | 0.2894372<br>34 | 3.9386001<br>14 | 8.19584E-<br>05 | 0.0007669<br>79 | #N/A          |
| SAOUHSC_011<br>29  | YP_499672.1 | 392072<br>9 | arcC1 | Carbamate kinase 1 (EC 2.7.2.2)                                                 | 63.031678<br>3  | 3.888321857      | 0.7341550<br>84 | 3.9342121<br>58 | 8.347E-05       | 0.0007783<br>65 | Clust<br>er 1 |
| SAOUHSC_T00<br>021 |             | 392134<br>0 |       |                                                                                 | 45.628985<br>77 | 2.587933288      | 0.4039720<br>12 | 3.9308002<br>54 | 8.46636E-<br>05 | 0.0007812<br>14 | Clust<br>er 6 |
| SAOUHSC_009<br>10  | YP_499463.1 | 392079<br>7 |       | Uncharacterized protein                                                         | 225.74304<br>91 | 2.02719521       | 0.2613027<br>17 | 3.9310544<br>58 | 8.45741E-<br>05 | 0.0007812<br>14 | Clust<br>er 5 |
| SAOUHSC_019<br>02  | YP_500403.1 | 392084<br>9 |       | Uncharacterized protein                                                         | 71.181658<br>54 | 2.700763868      | 0.4325478<br>62 | 3.9319668<br>79 | 8.42537E-<br>05 | 0.0007812<br>14 | Clust<br>er 6 |
| SAOUHSC_015<br>92  | YP_500107.1 | 392000<br>8 |       | Transcriptional regulator, Fur, putative                                        | 319.17878<br>04 | 2.32483898       | 0.3375654<br>22 | 3.9246880<br>54 | 8.68422E-<br>05 | 0.0007985<br>25 | #N/A          |
| SAOUHSC_T00<br>016 |             | 392133<br>5 |       |                                                                                 | 123.02001<br>2  | 2.501754565      | 0.3847492<br>31 | 3.9032035<br>52 | 9.49278E-<br>05 | 0.0008698<br>42 | Clust<br>er 5 |
| SAOUHSC_029<br>08  | YP_501361.1 | 392136<br>0 |       | Uncharacterized protein                                                         | 83.058852<br>29 | 3.425664909      | 0.6229791<br>39 | 3.8936535<br>08 | 9.87457E-<br>05 | 0.0009016<br>95 | #N/A          |
| SAOUHSC_010<br>02  | YP_499554.1 | 392040<br>2 | qoxA  | Probable quinol oxidase subunit 2 (EC 1.10.3.-) (Quinol oxidase polypeptide II) | 2398.5619<br>93 | 2.410381586      | 0.3641578<br>31 | 3.8729953<br>48 | 0.0001075<br>06 | 0.0009749<br>42 | Clust<br>er 1 |
| SAOUHSC_013<br>86  | YP_499913.1 | 392067<br>7 |       | Phosphate transport system permease protein PstA                                | 16.846851<br>7  | 3.575134912      | 0.6648038<br>88 | 3.8735256<br>48 | 0.0001072<br>72 | 0.0009749<br>42 | #N/A          |
| SAOUHSC_005<br>59  | YP_499131.1 | 392060<br>4 |       | Protein VraC                                                                    | 62.459208<br>14 | 3.747100884      | 0.7114722<br>11 | 3.8611499<br>38 | 0.0001128<br>55 | 0.0010199<br>43 | Clust<br>er 5 |
| SAOUHSC_013<br>84  | YP_499911.1 | 392079<br>3 |       | Phosphate-specific transport system accessory protein PhoU                      | 18.585397<br>82 | 3.327509884      | 0.6063900<br>17 | 3.8383050<br>82 | 0.0001238<br>86 | 0.0011158<br>24 | #N/A          |
| SAOUHSC_013<br>34  | YP_499864.1 | 392019<br>9 |       | Uncharacterized protein                                                         | 81.639858<br>72 | 3.029235071      | 0.5318865<br>67 | 3.8151651<br>08 | 0.0001360<br>92 | 0.0012215<br>87 | #N/A          |
| SAOUHSC_025<br>44  | YP_501007.1 | 392113<br>3 |       | Molybdenum cofactor biosynthesis protein B                                      | 92.247665<br>25 | 2.589073221      | 0.4172244<br>73 | 3.8086769<br>19 | 0.0001397<br>12 | 0.0012498<br>34 | Clust<br>er 1 |
| SAOUHSC_002<br>01  | YP_498798.1 | 392035<br>7 |       | conserved hypothetical protein                                                  | 55.832112<br>59 | 4.168543272      | 0.8322017<br>37 | 3.8074220<br>84 | 0.0001404<br>23 | 0.0012519<br>47 | Clust<br>er 1 |
| SAOUHSC_001<br>62  |             | 391986<br>9 |       | Type I restriction enzyme R Protein (EC 3.1.21.3)                               | 259.25633<br>19 | 2.475669864      | 0.3905990<br>1  | 3.7779662<br>2  | 0.0001581<br>14 | 0.0014049<br>28 | #N/A          |
| SAOUHSC_008<br>33  | YP_499387.1 | 391894<br>5 |       | Uncharacterized protein                                                         | 201.47139<br>69 | 2.359516435      | 0.3608238<br>65 | 3.7678118<br>57 | 0.0001646<br>85 | 0.0014583<br>99 | Clust<br>er 4 |
| SAOUHSC_012<br>05  | YP_499742.1 | 391947<br>1 | ftsY  | Signal recognition particle receptor FtsY (SRP receptor)                        | 199.55915<br>33 | -2.29154004      | 0.3453431<br>54 | 3.7398744<br>54 | 0.0001841<br>12 | 0.0016249<br>9  | Clust<br>er 1 |
| SAOUHSC_010<br>03  | YP_499555.1 | 392040<br>3 |       | Uncharacterized protein                                                         | 8.6276780<br>46 | 4.12272283       | 0.8363834<br>69 | 3.7336018<br>04 | 0.0001887<br>61 | 0.0016604<br>66 | Clust<br>er 5 |
| SAOUHSC_027<br>44  | YP_501205.1 | 392161<br>8 |       | Amino acid ABC transporter, ATP-binding protein, putative                       | 106.08504<br>16 | 2.560304628      | 0.4183364<br>03 | 3.7297844<br>95 | 0.0001916<br>44 | 0.0016802<br>24 | Clust<br>er 1 |
| SAOUHSC_016<br>44  | YP_500156.1 | 392009<br>6 |       | Uncharacterized protein                                                         | 261.36810<br>7  | 1.836436587      | 0.2247779<br>21 | 3.7211687<br>96 | 0.0001983<br>03 | 0.0017328<br>52 | #N/A          |
| SAOUHSC_026<br>56  | YP_501118.1 | 392121<br>8 |       | Uncharacterized protein                                                         | 94.659781<br>37 | 2.631553568      | 0.4392277<br>41 | 3.7145959<br>07 | 0.0002035<br>29 | 0.0017726<br>47 | Clust<br>er 1 |
| SAOUHSC_006<br>03  | YP_499166.1 | 391892<br>2 |       | Uncharacterized protein                                                         | 132.91410<br>37 | 2.217594687      | 0.3286324<br>89 | 3.7050344<br>28 | 0.0002113<br>62 | 0.0018348<br>17 | Clust<br>er 1 |

|                |             |         |       |                                                                                                                          |             |              |              |             |             |             |           |
|----------------|-------------|---------|-------|--------------------------------------------------------------------------------------------------------------------------|-------------|--------------|--------------|-------------|-------------|-------------|-----------|
| SAOUHSC_01670  | YP_500181.1 | 3920082 |       | Cytidine deaminase (EC 3.5.4.5) (Cytidine aminohydrolase)                                                                | 146.2680721 | -2.081362602 | 0.292188213  | 3.700911105 | 0.000214827 | 0.001858556 | Cluster 1 |
| SAOUHSC_02849  | YP_501306.1 | 3921522 |       | Pyruvate oxidase, putative (EC 1.2.3.3)                                                                                  | 955.81855   | 1.795748221  | -0.215060637 | 3.70011096  | 0.000215505 | 0.001858556 | #N/A      |
| SAOUHSC_00883  | YP_499436.1 | 3919230 | mnhG1 | Na(+)/H(+) antiporter subunit G1 (Mnh complex subunit G1)                                                                | 247.0120807 | -2.169083684 | 0.316897777  | 3.689150783 | 0.000225004 | 0.001934154 | Cluster 1 |
| SAOUHSC_T00017 |             | 3921336 |       |                                                                                                                          | 25.90670018 | 3.645159646  | 0.718551012  | 3.681241279 | 0.000232101 | 0.001988686 | Cluster 5 |
| SAOUHSC_T00060 |             | 3921068 |       |                                                                                                                          | 14.7187466  | 3.442622392  | 0.667786342  | 3.657790282 | 0.000254399 | 0.002172683 | Cluster 5 |
| SAOUHSC_01082  | YP_499628.1 | 3919244 |       | conserved hypothetical protein                                                                                           | 36.09480249 | 3.197798262  | 0.60235786   | 3.648658727 | 0.000263613 | 0.002244112 | Cluster 5 |
| SAOUHSC_01233  | YP_499766.1 | 3920258 |       | Uncharacterized protein                                                                                                  | 275.8198608 | 2.912441694  | 0.524840378  | 3.643853967 | 0.000268586 | 0.002279093 | Cluster 5 |
| SAOUHSC_01650  | YP_500162.1 | 3920102 |       | 5-formyltetrahydrofolate cyclo-ligase (EC 6.3.3.2)                                                                       | 102.2418567 | 2.476261275  | -0.405841688 | 3.637529898 | 0.000275265 | 0.002328285 | Cluster 1 |
| SAOUHSC_02851  | YP_501308.1 | 3921524 | cidA  | Holin-like protein CidA                                                                                                  | 39.11957131 | 4.194063395  | -0.878612779 | 3.63534821  | 0.000277605 | 0.002340577 | Cluster 1 |
| SAOUHSC_01821  | YP_500326.1 | 3919291 |       | Uncharacterized protein                                                                                                  | 193.2919047 | 2.014009077  | 0.280381363  | 3.616535234 | 0.000298573 | 0.002509342 | #N/A      |
| SAOUHSC_01843  | YP_500348.1 | 3920522 |       | conserved hypothetical protein                                                                                           | 56.49360756 | 2.068396779  | 0.296131068  | 3.607851033 | 0.000308744 | 0.002586586 | #N/A      |
| SAOUHSC_02464  | YP_500932.1 | 3919027 |       | Uncharacterized protein                                                                                                  | 48.09426461 | 3.233480588  | -0.619627228 | 3.604555264 | 0.000312688 | 0.00261134  | Cluster 1 |
| SAOUHSC_T0004  |             | 3921323 |       |                                                                                                                          | 29.0216593  | 3.027259588  | 0.562826454  | 3.601926618 | 0.000315868 | 0.002629572 | Cluster 5 |
| SAOUHSC_T00050 |             | 3921039 |       |                                                                                                                          | 7.528816485 | 4.580367312  | 0.994818504  | 3.599015597 | 0.000319424 | 0.002650818 | Cluster 6 |
| SAOUHSC_00555  | YP_499127.1 | 3920600 |       | Hydrolase, haloacid dehalogenase-like                                                                                    | 41.22970823 | 2.311435375  | 0.365096777  | 3.592021232 | 0.000328123 | 0.002714473 | Cluster 6 |
| SAOUHSC_00146  | YP_498745.1 | 3919854 |       | Uncharacterized protein                                                                                                  | 89.34202269 | 2.851576907  | -0.517183168 | 3.580118268 | 0.000343439 | 0.002832296 | Cluster 1 |
| SAOUHSC_00545  | YP_499118.1 | 3920825 | sdrD  | Serine-aspartate repeat-containing protein D                                                                             | 601.2367576 | 2.342464144  | -0.375164093 | 3.578338572 | 0.000345785 | 0.002842765 | #N/A      |
| SAOUHSC_00185  | YP_498782.1 | 3919499 |       | Uncharacterized sensor-like histidine kinase SAOUHSC_00185 (EC 2.7.13.3)                                                 | 52.45810444 | 3.693728648  | -0.753712544 | 3.57394695  | 0.00035164  | 0.002881921 | #N/A      |
| SAOUHSC_01363  | YP_499890.1 | 3920068 |       | Uncharacterized protein                                                                                                  | 385.186297  | 2.142069494  | 0.32000966   | 3.568859427 | 0.000358539 | 0.002929361 | Cluster 3 |
| SAOUHSC_T00020 |             | 3921339 |       |                                                                                                                          | 18.15214539 | 4.569140079  | 1.006104728  | 3.547483657 | 0.00038893  | 0.003167858 | #N/A      |
| SAOUHSC_02287  | YP_500769.1 | 3919162 | leuC  | 3-isopropylmalate dehydratase large subunit (EC 4.2.1.33) (Alpha-IPM isomerase) (IPMI) (Isopropylmalate isomerase)       | 443.5088941 | 2.309716368  | 0.370044413  | 3.539349118 | 0.000401115 | 0.003257054 | #N/A      |
| SAOUHSC_02412  | YP_500887.1 | 3919626 |       | Uncharacterized protein                                                                                                  | 34.31864721 | 3.473717133  | 0.701903314  | 3.524298979 | 0.000424605 | 0.003437215 | #N/A      |
| SAOUHSC_02281  | YP_500763.1 | 3919156 | ilvD  | Dihydroxy-acid dehydratase (DAD) (EC 4.2.1.9)                                                                            | 514.4671418 | 2.39368242   | 0.395924614  | 3.520070162 | 0.000431433 | 0.003481807 | Cluster 5 |
| SAOUHSC_00991  | YP_499543.1 | 3920391 |       | Uncharacterized protein                                                                                                  | 50.08891155 | 2.719711731  | 0.48965885   | 3.512060959 | 0.000444646 | 0.003577502 | #N/A      |
| SAOUHSC_02225  | YP_500710.1 | 3919648 |       | Conserved hypothetical phage protein                                                                                     | 27.05240785 | 3.868499872  | 0.82117897   | 3.493148237 | 0.000477361 | 0.003829048 | #N/A      |
| SAOUHSC_00287  | YP_498878.1 | 3918969 |       | ABC transporter, ATP-binding protein, putative                                                                           | 185.4433664 | 1.949084944  | -0.272187809 | 3.486875291 | 0.000488699 | 0.003908113 | #N/A      |
| SAOUHSC_01222  | YP_499758.1 | 3920250 | topA  | DNA topoisomerase 1 (EC 5.6.2.2) (DNA topoisomerase I) (Omega-protein) (Relaxing enzyme) (Swivelase) (Untwisting enzyme) | 610.9216412 | 2.031432572  | 0.295877401  | 3.486013361 | 0.000490277 | 0.003908881 | Cluster 5 |

|                   |             |             |       |                                                                                                                                                                                                                                 |                 |                  |                 |                 |                 |                 |           |
|-------------------|-------------|-------------|-------|---------------------------------------------------------------------------------------------------------------------------------------------------------------------------------------------------------------------------------|-----------------|------------------|-----------------|-----------------|-----------------|-----------------|-----------|
| SAOUHSC_022<br>84 | YP_500766.1 | 391915<br>9 | ilvC  | Ketol-acid reductoisomerase (NADP(+)) (KARI) (EC 1.1.1.86) (Acetohydroxy-acid isomeroreductase) (AHIR) (Alpha-keto-beta-hydroxyacyl reductoisomerase) (Ketol-acid reductoisomerase type 1) (Ketol-acid reductoisomerase type I) | 506.63502<br>72 | 2.469032561      | 0.4223554<br>59 | 3.4781900<br>61 | 0.0005048<br>12 | 0.0040126<br>46 | #N/A      |
| SAOUHSC_023<br>40 | YP_500819.1 | 392096<br>5 | atpC  | ATP synthase epsilon chain (ATP synthase F1 sector epsilon subunit) (F-ATPase epsilon subunit)                                                                                                                                  | 689.21837<br>46 | -<br>2.186725967 | 0.3424685<br>27 | 3.4652117<br>62 | 0.0005298<br>14 | 0.0041987<br>37 | #N/A      |
| SAOUHSC_003<br>10 | YP_498900.1 | 391953<br>7 | ulaA  | Uncharacterized protein                                                                                                                                                                                                         | 216.98178<br>01 | -3.10660019      | 0.6096532<br>87 | 3.4554069<br>27 | 0.0005494<br>63 | 0.0043414<br>15 | Cluster 2 |
| SAOUHSC_000<br>69 | YP_498670.1 | 391944<br>8 | spa   | Immunoglobulin G-binding protein A (IgG-binding protein A) (Staphylococcal protein A) (SpA)                                                                                                                                     | 2604.3602<br>71 | -3.15012281      | 0.6229045<br>55 | 3.4517692<br>85 | 0.0005569<br>24 | 0.0043872<br>29 | #N/A      |
| SAOUHSC_023<br>49 | YP_500825.1 | 391939<br>2 | atpE  | ATP synthase subunit c (ATP synthase F0) sector subunit c) (F-type ATPase subunit c) (F-ATPase subunit c) (Lipid-binding protein)                                                                                               | 632.80886<br>21 | 1.850817051      | 0.2477201<br>66 | 3.4345893<br>79 | 0.0005934<br>52 | 0.0046610<br>74 | Cluster 1 |
| SAOUHSC_028<br>62 | YP_501318.1 | 392153<br>4 | clpL  | ATP-dependent Clp protease ATP-binding subunit ClpL                                                                                                                                                                             | 214.41129<br>04 | -2.692458906     | 0.4964055<br>78 | 3.4094276<br>59 | 0.0006509<br>93 | 0.0050978<br>39 | #N/A      |
| SAOUHSC_026<br>62 | YP_501124.1 | 392122<br>4 |       | PTS system sucrose-specific IIBC component (EC 2.7.1.69)                                                                                                                                                                        | 62.403749<br>69 | 1.867465911      | 0.2545208<br>85 | 3.4082307<br>66 | 0.0006538<br>56 | 0.0051051<br>04 | Cluster 3 |
| SAOUHSC_017<br>06 | YP_500216.1 | 392109<br>6 |       | Uncharacterized protein                                                                                                                                                                                                         | 63.176199<br>67 | 2.111912472      | 0.3271147<br>55 | 3.3991510<br>77 | 0.0006759<br>54 | 0.0052620<br>7  | #N/A      |
| SAOUHSC_013<br>65 | YP_499892.1 | 392007<br>0 |       | Uncharacterized protein                                                                                                                                                                                                         | 305.53377<br>18 | 1.565331726      | 0.1665406<br>59 | 3.3945568<br>02 | 0.0006873<br>98 | 0.0053354<br>2  | Cluster 3 |
| SAOUHSC_020<br>86 | YP_500578.1 | 391977<br>2 |       | PV83 orf 4-like protein-related protein                                                                                                                                                                                         | 4.2196167<br>18 | 3.753695307      | 0.8194279<br>94 | 3.3605091<br>94 | 0.0007779<br>89 | 0.0060208<br>62 | #N/A      |
| SAOUHSC_017<br>87 | YP_500292.1 | 392042<br>9 |       | Uncharacterized protein                                                                                                                                                                                                         | 758.75125<br>29 | 1.779312187      | 0.2321015<br>58 | 3.3576344<br>58 | 0.0007861<br>25 | 0.0060660<br>35 | #N/A      |
| SAOUHSC_005<br>81 | YP_499148.1 | 392050<br>5 |       | Uncharacterized protein                                                                                                                                                                                                         | 88.454849<br>14 | 2.23536283       | 0.3685509<br>67 | 3.3519457<br>01 | 0.0008024<br>58 | 0.0061740<br>1  | #N/A      |
| SAOUHSC_025<br>84 | YP_501046.1 | 392158<br>0 |       | Uncharacterized protein                                                                                                                                                                                                         | 115.77794<br>06 | -2.1259576       | 0.3361455<br>72 | 3.3496130<br>63 | 0.0008092<br>45 | 0.0062081<br>34 | Cluster 1 |
| SAOUHSC_021<br>01 | YP_500592.1 | 392117<br>3 |       | Uncharacterized protein                                                                                                                                                                                                         | 91.486122<br>62 | 2.030388282      | 0.3080462<br>52 | 3.3449141<br>96 | 0.0008230<br>8  | 0.0062959<br>68 | #N/A      |
| SAOUHSC_019<br>97 | YP_500494.1 | 392187<br>7 | perR  | Peroxide-responsive repressor PerR                                                                                                                                                                                              | 1514.3893<br>32 | 1.591628487      | 0.1775407<br>87 | 3.3323525<br>05 | 0.0008611<br>51 | 0.0065681<br>43 | Cluster 3 |
| SAOUHSC_012<br>04 | YP_499741.1 | 391947<br>0 | smc   | Chromosome partition protein Smc                                                                                                                                                                                                | 294.60902<br>58 | 2.138150576      | 0.3419524<br>87 | 3.3283880<br>67 | 0.0008735<br>01 | 0.0066431<br>39 | #N/A      |
| SAOUHSC_027<br>69 | YP_501228.1 | 392142<br>4 |       | Uncharacterized protein                                                                                                                                                                                                         | 15.896386<br>62 | 3.321441574      | 0.6988982<br>24 | 3.3215731<br>49 | 0.0008951<br>15 | 0.0067879<br>57 | Cluster 5 |
| SAOUHSC_007<br>69 | YP_499326.1 | 391906<br>0 | secA1 | Protein translocase subunit SecA 1                                                                                                                                                                                              | 1665.1716<br>31 | 1.470091727      | 0.1416294<br>04 | 3.3191675<br>81 | 0.0009028<br>62 | 0.0068270<br>88 | Cluster 1 |
| SAOUHSC_016<br>68 | YP_500179.2 | 392008<br>0 | era   | GTPase Era                                                                                                                                                                                                                      | 260.26345<br>27 | 1.943876455      | 0.2858695<br>53 | 3.3017732<br>88 | 0.0009607<br>57 | 0.0072441<br>07 | Cluster 1 |
| SAOUHSC_007<br>97 | YP_499353.1 | 391936<br>0 | tpiA  | Triosephosphate isomerase (TIM) (TPI) (EC 5.3.1.1) (Triose-phosphate isomerase)                                                                                                                                                 | 1088.8247<br>28 | 2.153699959      | 0.3516556<br>98 | 3.2807657<br>18 | 0.0010352<br>57 | 0.0077835<br>99 | #N/A      |
| SAOUHSC_025<br>49 | YP_501011.1 | 392113<br>7 |       | Molybdenum ABC transporter, periplasmic molybdate-binding protein                                                                                                                                                               | 213.75034<br>1  | 2.432571722      | 0.4372337<br>41 | 3.2764436<br>7  | 0.0010512<br>33 | 0.0078812<br>6  | Cluster 1 |
| SAOUHSC_023<br>30 | YP_500809.1 | 392095<br>5 |       | Phosphomethylpyrimidine kinase (EC 2.7.4.7)                                                                                                                                                                                     | 20.712976<br>14 | 3.987619546      | 0.9124130<br>33 | 3.2744156<br>84 | 0.0010588<br>07 | 0.0079155<br>59 | #N/A      |
| SAOUHSC_003<br>29 | YP_498918.1 | 391959<br>4 | tatA  | Sec-independent protein translocase protein TatA                                                                                                                                                                                | 56.981843<br>33 | 2.283103484      | 0.3920304<br>05 | 3.2729693<br>08 | 0.0010642<br>4  | 0.0079337<br>01 | Cluster 6 |
| SAOUHSC_023<br>29 | YP_500808.1 | 392095<br>4 | thiM  | Hydroxyethylthiazole kinase (EC 2.7.1.50) (4-methyl-5-beta-hydroxyethylthiazole kinase) (TH kinase) (Thz kinase)                                                                                                                | 36.337710<br>26 | 3.582068463      | 0.7897170<br>16 | 3.2696122<br>94 | 0.0010769<br>5  | 0.0080058<br>33 | Cluster 1 |
| SAOUHSC_022<br>88 | YP_500770.1 | 391916<br>3 | leuD  | 3-isopropylmalate dehydratase small subunit (EC 4.2.1.33) (Alpha-IPM isomerase) (IPMI) (Isopropylmalate isomerase)                                                                                                              | 245.42453<br>48 | 2.482381953      | 0.4548521<br>27 | 3.2590414<br>87 | 0.0011178<br>93 | 0.0082868<br>54 | #N/A      |
| SAOUHSC_002<br>58 | YP_498852.1 | 391920<br>0 | esaA  | ESAT-6 secretion accessory factor EsaA                                                                                                                                                                                          | 134.52049<br>61 | 2.431116435      | 0.4396871<br>69 | 3.2548514<br>82 | 0.0011345<br>17 | 0.0083865<br>26 | #N/A      |

|                    |             |             |               |                                                                                                                                                                                                                                                                                   |                 |                          |                 |                 |                 |                 |           |
|--------------------|-------------|-------------|---------------|-----------------------------------------------------------------------------------------------------------------------------------------------------------------------------------------------------------------------------------------------------------------------------------|-----------------|--------------------------|-----------------|-----------------|-----------------|-----------------|-----------|
| SAOUHSC_020<br>87  | YP_500579.1 | 391977<br>3 |               | Conserved hypothetical phage protein                                                                                                                                                                                                                                              | 4.2401548<br>25 | 0.8138941<br>3.637966874 | 3.2411668<br>91 | 0.0011904<br>53 | 0.0087751<br>15 | 53              | #N/A      |
| SAOUHSC_022<br>85  | YP_500767.1 | 391916<br>0 | leuA          | 2-isopropylmalate synthase (EC 2.3.3.13) (Alpha-IPM synthase) (Alpha-isopropylmalate synthase)                                                                                                                                                                                    | 605.68156<br>73 | 0.4253919<br>2.377162223 | 3.2373959<br>59 | 0.0012062<br>91 | 0.0088671<br>59 | 8               | #N/A      |
| SAOUHSC_011<br>93  | YP_499732.1 | 391932<br>6 |               | Uncharacterized protein<br>SAOUHSC_01193                                                                                                                                                                                                                                          | 488.16393<br>05 | 1.872752466              | 0.2699221<br>37 | 3.2333489<br>85 | 0.0012234<br>8  | 0.0089687<br>88 | Cluster 5 |
| SAOUHSC_022<br>24  | YP_500709.1 | 391964<br>7 | SAOUHSC_02076 | Phi PVL orf 38-like protein-related protein                                                                                                                                                                                                                                       | 8.7127465<br>8  | 4.024946142              | 0.9378119<br>31 | 3.2255359<br>97 | 0.0012573<br>7  | 0.0091916<br>9  | #N/A      |
| SAOUHSC_004<br>08  | YP_498994.1 | 392056<br>6 |               | Uncharacterized protein                                                                                                                                                                                                                                                           | 30.385547<br>56 | -3.56849077              | 0.7978559<br>23 | 3.2192413<br>41 | 0.0012853<br>03 | 0.0093699<br>27 | #N/A      |
| SAOUHSC_028<br>01  | YP_501260.1 | 392145<br>5 | gtaB          | UTP--glucose-1-phosphate uridylyltransferase (EC 2.7.7.9) (Alpha-D-glucosyl-1-phosphate uridylyltransferase) (UDP-glucose pyrophosphorylase) (UDPGP) (Uridine diphosphoglucose pyrophosphorylase)                                                                                 | 78.769881<br>47 | -<br>3.191199644         | 0.6858203<br>14 | 3.1950054<br>55 | 0.0013982<br>82 | 0.0101654<br>71 | #N/A      |
| SAOUHSC_002<br>09  | YP_498805.1 | 392036<br>4 |               | PTS system, glucose-specific IIBC component, putative (EC 2.7.1.69)                                                                                                                                                                                                               | 114.74957<br>66 | -<br>2.395100399         | 0.4378028<br>69 | 3.1865949<br>26 | 0.0014395<br>82 | 0.0104369<br>72 | Cluster 1 |
| SAOUHSC_000<br>51  | YP_498656.1 | 391908<br>3 | plc           | 1-phosphatidylinositol phosphodiesterase (EC 4.6.1.13) (Phosphatidylinositol diacylglycerol-lyase) (Phosphatidylinositol-specific phospholipase C) (PI-PLC)                                                                                                                       | 23.115140<br>03 | -<br>3.616038648         | 0.8221718<br>33 | 3.1818636<br>26 | 0.0014633<br>07 | 0.0105522<br>68 | Cluster 1 |
| SAOUHSC_006<br>97  | YP_499256.1 | 392100<br>1 |               | Uncharacterized protein                                                                                                                                                                                                                                                           | 68.463061<br>89 | -<br>2.764018917         | 0.5544040<br>75 | 3.1818289<br>18 | 0.0014634<br>82 | 0.0105522<br>68 | #N/A      |
| SAOUHSC_000<br>61  | YP_498665.1 | 391909<br>2 |               | Uncharacterized protein                                                                                                                                                                                                                                                           | 69.919915<br>6  | -2.44601191              | 0.4578948<br>53 | 3.1579562<br>45 | 0.0015887<br>94 | 0.0114245<br>98 | #N/A      |
| SAOUHSC_027<br>37  | YP_501198.1 | 392161<br>1 |               | Epimerase/dehydratase, putative                                                                                                                                                                                                                                                   | 102.40152<br>04 | 1.806915502              | 0.2570060<br>17 | 3.1396755<br>32 | 0.0016913<br>51 | 0.0121290<br>06 | Cluster 5 |
| SAOUHSC_010<br>13  | YP_499563.1 | 392027<br>4 | purL          | Phosphoribosylformylglycinamide synthase subunit PurL (FGAM synthase) (EC 6.3.5.3) (Formylglycinamide ribonucleotide amidotransferase subunit II) (FGAR amidotransferase II) (FGAR-AT II) (Glutamine amidotransferase PurL) (Phosphoribosylformylglycinamide synthase subunit II) | 148.29639<br>03 | 1.81898256               | 0.2611935<br>52 | 3.1355389<br>71 | 0.0017153<br>86 | 0.0122680<br>34 | Cluster 6 |
| SAOUHSC_009<br>05  | YP_499458.1 | 392175<br>1 | addA          | ATP-dependent helicase/nuclease subunit A (EC 3.1.-.-) (EC 3.6.4.12) (ATP-dependent helicase/nuclease AddA)                                                                                                                                                                       | 567.34575<br>55 | -<br>1.523187822         | 0.1671285<br>23 | 3.1304520<br>15 | 0.0017453<br>75 | 0.0124487<br>7  | Cluster 1 |
| SAOUHSC_002<br>03  | YP_498800.1 | 392035<br>9 |               | Uncharacterized protein                                                                                                                                                                                                                                                           | 44.861273<br>64 | -<br>2.725779643         | 0.5568713<br>17 | 3.0990636<br>28 | 0.0019413<br>33 | 0.0138091<br>06 | Cluster 1 |
| SAOUHSC_T00<br>023 |             | 392114<br>9 |               |                                                                                                                                                                                                                                                                                   | 40.002130<br>47 | 2.866868297              | 0.6030640<br>87 | 3.0956383<br>19 | 0.0019638<br>98 | 0.0139234<br>82 | Cluster 5 |
| SAOUHSC_T00<br>058 |             | 392104<br>7 |               |                                                                                                                                                                                                                                                                                   | 18.515006<br>1  | 2.940366038              | 0.6269306<br>99 | 3.0950247<br>61 | 0.0019679<br>65 | 0.0139234<br>82 | Cluster 5 |
| SAOUHSC_017<br>84  | YP_500289.1 | 392042<br>6 | rplT          | 50S ribosomal protein L20                                                                                                                                                                                                                                                         | 349.19467<br>33 | 2.752594167              | 0.5670091<br>45 | 3.0909451<br>52 | 0.0019952<br>05 | 0.0140784<br>64 | Cluster 5 |
| SAOUHSC_009<br>01  | YP_499454.1 | 392174<br>7 |               | Uncharacterized protein                                                                                                                                                                                                                                                           | 188.87353<br>3  | 1.822252579              | 0.2664532<br>48 | 3.0859168<br>94 | 0.0020292<br>55 | 0.0142805<br>46 | #N/A      |
| SAOUHSC_016<br>47  | YP_500159.1 | 392009<br>9 |               | Uncharacterized protein                                                                                                                                                                                                                                                           | 127.93575<br>4  | 1.978136378              | 0.3172573<br>41 | 3.0831008<br>51 | 0.0020485<br>57 | 0.0143780<br>38 | Cluster 1 |
| SAOUHSC_003<br>13  | YP_498903.1 | 391954<br>0 |               | Uncharacterized protein                                                                                                                                                                                                                                                           | 240.68526<br>03 | -2.8494669               | 0.6002871<br>88 | 3.0809701<br>35 | 0.0020632<br>73 | 0.0144429<br>14 | Cluster 2 |
| SAOUHSC_T00<br>056 |             | 392104<br>5 |               |                                                                                                                                                                                                                                                                                   | 139.29418<br>72 | 2.198038219              | 0.3890828<br>9  | 3.0791336<br>52 | 0.0020760<br>35 | 0.0144938<br>02 | #N/A      |
| SAOUHSC_015<br>90  | YP_500105.1 | 392000<br>6 |               | Uncharacterized protein                                                                                                                                                                                                                                                           | 28.366595<br>59 | 2.707411254              | 0.5561850<br>79 | 3.0698616<br>68 | 0.0021415<br>79 | 0.0149119<br>47 | Cluster 5 |
| SAOUHSC_010<br>05  | YP_499556.1 | 392040<br>4 |               | Uncharacterized protein                                                                                                                                                                                                                                                           | 383.73094<br>31 | 1.988541483              | 0.3227153<br>03 | 3.0631998<br>98 | 0.0021898<br>37 | 0.0152078<br>43 | Cluster 3 |
| SAOUHSC_005<br>44  | YP_499117.1 | 392082<br>4 | sdrC          | Serine-aspartate repeat-containing protein C                                                                                                                                                                                                                                      | 358.64111<br>74 | -2.23151853              | 0.4024756<br>82 | 3.0598582<br>34 | 0.0022144<br>18 | 0.0153381<br>85 | #N/A      |
| SAOUHSC_018<br>36  | YP_500342.1 | 392178<br>6 |               | Uncharacterized protein                                                                                                                                                                                                                                                           | 117.82505<br>39 | 2.023549329              | 0.3350917<br>61 | 3.0545344<br>55 | 0.0022541<br>01 | 0.0155721<br>81 | #N/A      |

|                |             |        |   |      |                                                                                                                                                                                               |           |    |   |           |           |   |           |           |           |
|----------------|-------------|--------|---|------|-----------------------------------------------------------------------------------------------------------------------------------------------------------------------------------------------|-----------|----|---|-----------|-----------|---|-----------|-----------|-----------|
| SAOUHSC_008    | YP_498804.1 | 392036 | 3 |      | Uncharacterized protein                                                                                                                                                                       | 14.252626 | 61 | - | 0.8885843 | 3.0528899 | - | 0.0022664 | 0.0156168 | Cluster 1 |
| SAOUHSC_02784  | YP_501244.1 | 392143 | 9 |      | Uncharacterized protein                                                                                                                                                                       | 68.245122 | 64 | - | 0.4467430 | 3.0514765 | - | 0.0022771 | 0.0156497 | Cluster 1 |
| SAOUHSC_02387  | YP_500864.1 | 391960 | 4 |      | Uncharacterized protein                                                                                                                                                                       | 136.70915 | 06 | - | 0.4890335 | 3.0475067 | - | 0.0023074 | 0.0158167 | #N/A      |
| SAOUHSC_00881  | YP_499434.1 | 391922 | 8 |      | Uncharacterized protein                                                                                                                                                                       | 170.66083 | 36 | - | 0.2031841 | 3.0459714 | - | 0.0023192 | 0.0158565 | Cluster 3 |
| SAOUHSC_01785  | YP_500290.1 | 392042 | 7 | rpmI | 50S ribosomal protein L35                                                                                                                                                                     | 429.21142 | 7  | - | 0.5772175 | 3.0427548 | - | 0.0023442 | 0.0159856 | Cluster 5 |
| SAOUHSC_02351  | YP_500827.1 | 391939 | 4 |      | Uncharacterized protein                                                                                                                                                                       | 753.31428 | 65 | - | 0.2102111 | 3.0160982 | - | 0.0025605 | 0.0174153 | Cluster 1 |
| SAOUHSC_02286  | YP_500768.1 | 391916 | 1 | leuB | 3-isopropylmalate dehydrogenase (EC 1.1.1.85) (3-IPM-DH) (Beta-IPM dehydrogenase) (IMDH)                                                                                                      | 333.08816 | 5  | - | 0.3683673 | 3.0040007 | - | 0.0026645 | 0.0180764 | #N/A      |
| SAOUHSC_T00028 |             | 392115 | 4 |      |                                                                                                                                                                                               | 8.9752077 | 92 | - | 0.9701224 | 2.9865389 | - | 0.0028215 | 0.0190924 | #N/A      |
| SAOUHSC_00184  | YP_498781.1 | 391949 | 8 |      | Uncharacterized response regulatory protein SAOUHSC_00184                                                                                                                                     | 39.179555 | 04 | - | 0.7011547 | 2.9812301 | - | 0.0028709 | 0.0193769 | #N/A      |
| SAOUHSC_02110  | YP_500602.1 | 392118 | 2 |      | Uncharacterized protein                                                                                                                                                                       | 100.52943 | 91 | - | 0.3525746 | 2.9800625 | - | 0.0028818 | 0.0194013 | #N/A      |
| SAOUHSC_02945  | YP_501397.1 | 392165 | 1 |      | Siroheme synthase, putative                                                                                                                                                                   | 58.732852 | 11 | - | 0.5546799 | 2.9755297 | - | 0.0029248 | 0.0196402 | #N/A      |
| SAOUHSC_01093  | YP_499638.1 | 392073 | 6 | pheT | Phenylalanine--tRNA ligase beta subunit (EC 6.1.1.20) (Phenylalanyl-tRNA synthetase beta subunit) (PheRS)                                                                                     | 316.71500 | 88 | - | 0.2661573 | 2.9526445 | - | 0.0031506 | 0.0211029 | #N/A      |
| SAOUHSC_01603  | YP_500118.1 | 392001 | 9 |      | Uncharacterized protein                                                                                                                                                                       | 109.23682 | 98 | - | 0.3852495 | 2.9474297 | - | 0.0032042 | 0.0214078 | #N/A      |
| SAOUHSC_00366  | YP_498955.1 | 391978 | 5 | nfrA | NADPH-dependent oxidoreductase (EC 1.6.-.-)                                                                                                                                                   | 120.65472 | 99 | - | 0.2759381 | 2.9412508 | - | 0.0032688 | 0.0217843 | #N/A      |
| SAOUHSC_00107  | YP_498707.1 | 391981 | 6 |      | Uncharacterized protein                                                                                                                                                                       | 98.744604 | 31 | - | 0.3669028 | 2.9314022 | - | 0.0033743 | 0.0223935 | #N/A      |
| SAOUHSC_T0001  |             | 392151 | 7 |      |                                                                                                                                                                                               | 23.022214 | 05 | - | 0.7155068 | 2.9307038 | - | 0.0033819 | 0.0223935 | Cluster 6 |
| SAOUHSC_02108  | YP_500600.1 | 392118 | 0 | ftnA | Bacterial non-heme ferritin (EC 1.16.3.2)                                                                                                                                                     | 744.50178 | 34 | - | 0.5514069 | 2.9303541 | - | 0.0033857 | 0.0223935 | Cluster 4 |
| SAOUHSC_T00059 |             | 392106 | 7 |      |                                                                                                                                                                                               | 14.125237 | 94 | - | 0.6577496 | 2.9271235 | - | 0.0034211 | 0.0225709 | Cluster 5 |
| SAOUHSC_01085  | YP_499630.1 | 391924 | 6 |      | conserved hypothetical protein                                                                                                                                                                | 35.982969 | 46 | - | 0.5771454 | 2.9242720 | - | 0.0034526 | 0.0227219 | Cluster 6 |
| SAOUHSC_00893  | YP_499446.1 | 392173 | 9 |      | FMN oxidoreductase, putative                                                                                                                                                                  | 194.79132 | 91 | - | 0.2982041 | 2.9168281 | - | 0.0035361 | 0.0232133 | #N/A      |
| SAOUHSC_T00027 |             | 392115 | 3 |      |                                                                                                                                                                                               | 151.60836 | 6  | - | 0.4568579 | 2.9118625 | - | 0.0035928 | 0.0235270 | #N/A      |
| SAOUHSC_01645  | YP_500157.1 | 392009 | 7 |      | Uncharacterized protein                                                                                                                                                                       | 214.56843 | 54 | - | 0.2687536 | 2.9056042 | - | 0.0036654 | 0.0239433 | #N/A      |
| SAOUHSC_01477  | YP_499995.1 | 392023 | 2 |      | Uncharacterized protein                                                                                                                                                                       | 2993.9144 | 71 | - | 0.2584013 | 2.9019252 | - | 0.0037087 | 0.0241665 | #N/A      |
| SAOUHSC_03010  | YP_501459.1 | 392149 | 1 | hisH | Imidazole glycerol phosphate synthase subunit HisH (EC 4.3.2.10) (IGP synthase glutaminase subunit) (EC 3.5.1.2) (IGP synthase subunit HisH) (ImGP synthase subunit HisH) (IGPS subunit HisH) | 48.803905 | 63 | - | 0.4308673 | 2.8837767 | - | 0.0039293 | 0.0255409 | #N/A      |
| SAOUHSC_T00013 |             | 392133 | 2 |      |                                                                                                                                                                                               | 35.013364 | 32 | - | 0.5386583 | 2.8795696 | - | 0.0039821 | 0.0258205 | Cluster 5 |
| SAOUHSC_00177  | YP_498774.1 | 391949 | 1 |      | Maltose ABC transporter, permease protein, putative                                                                                                                                           | 155.92523 | 46 | - | 0.6313151 | 2.8735267 | - | 0.0040591 | 0.0262552 | #N/A      |
| SAOUHSC_00866  | YP_499419.1 | 391899 | 6 |      | D-isomer specific 2-hydroxyacid dehydrogenase, NAD binding domain protein                                                                                                                     | 171.62229 | 91 | - | 0.3281502 | 2.8669262 | - | 0.0041447 | 0.0267435 | #N/A      |
| SAOUHSC_00828  | YP_499383.1 | 391894 | 1 |      | Uncharacterized protein                                                                                                                                                                       | 295.92877 | 16 | - | 0.3249189 | 2.8506119 | - | 0.0043635 | 0.0280861 | #N/A      |
| SAOUHSC_T00053 |             | 392104 | 2 |      |                                                                                                                                                                                               | 37.649317 | 53 | - | 0.4311617 | 2.8462621 | - | 0.0044235 | 0.0284034 | Cluster 5 |
| SAOUHSC_02990  | YP_501439.1 | 392147 | 2 |      | conserved hypothetical protein                                                                                                                                                                | 671.39388 | 06 | - | 0.5436332 | 2.8252321 | - | 0.0047246 | 0.0302629 | #N/A      |

|                    |                |             |       |                                                                                                                                                                                                                      |                 |             |                 |                 |                 |                 |           |
|--------------------|----------------|-------------|-------|----------------------------------------------------------------------------------------------------------------------------------------------------------------------------------------------------------------------|-----------------|-------------|-----------------|-----------------|-----------------|-----------------|-----------|
| SAOUHSC_022<br>61  | YP_500743.1    | 391913<br>7 | agrB  | Accessory gene regulator protein B (EC 3.4.-.-)                                                                                                                                                                      | 95.783047<br>12 | 2.017709428 | 0.3604926<br>18 | 2.8231075<br>39 | 0.0047560<br>62 | 0.0303904<br>27 | #N/A      |
| SAOUHSC_025<br>87  | YP_501049.1    | 392158<br>3 |       | Uncharacterized protein                                                                                                                                                                                              | 52.403016<br>45 | 2.067879502 | 0.3822803<br>33 | 2.7934460<br>9  | 0.0052149<br>72 | 0.0332422<br>98 | Cluster 5 |
| SAOUHSC_013<br>30  | YP_499860.1    | 392019<br>5 | guaC  | GMP reductase (EC 1.7.1.7) (Guanosine 5'-monophosphate oxidoreductase) (Guanosine monophosphate reductase)                                                                                                           | 102.61569<br>49 | 2.412021362 | 0.5069770<br>18 | 2.7851782<br>47 | 0.0053498<br>31 | 0.0340197<br>66 | Cluster 5 |
| SAOUHSC_004<br>34  | YP_499017.1    | 391910<br>6 |       | Transcriptional regulator, lysR family, putative                                                                                                                                                                     | 27.480458<br>21 | 2.230906008 | 0.4436209<br>74 | 2.7746794<br>66 | 0.0055256<br>14 | 0.0350531<br>12 | Cluster 5 |
| SAOUHSC_025<br>50  | YP_501012.1    | 392113<br>8 | fdhD  | Sulfur carrier protein FdhD                                                                                                                                                                                          | 62.043356<br>33 | 2.276306116 | 0.4601655<br>98 | 2.7735800<br>37 | 0.0055443<br>2  | 0.0350874<br>35 | #N/A      |
| SAOUHSC_016<br>33  | YP_500146.1    | 391997<br>0 | gcvPA | Probable glycine dehydrogenase (decarboxylating) subunit 1 (EC 1.4.4.2) (Glycine cleavage system P-protein subunit 1) (Glycine decarboxylase subunit 1) (Glycine dehydrogenase (aminomethyl-transferring) subunit 1) | 268.75888<br>55 | 1.715139018 | 0.2584156<br>24 | 2.7673985<br>26 | 0.0056505<br>63 | 0.0356742<br>5  | Cluster 6 |
| SAOUHSC_018<br>06  | YP_500311.1    | 391927<br>6 | pyk   | Pyruvate kinase (PK) (EC 2.7.1.40)                                                                                                                                                                                   | 1797.4147<br>85 | 2.047127324 | 0.3787997<br>25 | 2.7643296<br>82 | 0.0057039<br>88 | 0.0358412<br>52 | #N/A      |
| SAOUHSC_026<br>47  | YP_501109.1    | 392120<br>9 | mgo   | Probable malate:quinone oxidoreductase (EC 1.1.5.4) (MQO) (Malate dehydrogenase [quinone])                                                                                                                           | 419.94054<br>81 | -1.84481884 | 0.3056155<br>61 | 2.7643187<br>94 | 0.0057041<br>78 | 0.0358412<br>52 | Cluster 1 |
| SAOUHSC_018<br>93  | YP_500394.1    | 392084<br>0 |       | Arsenical pump membrane protein                                                                                                                                                                                      | 80.274106<br>16 | 2.410715116 | 0.5106652<br>29 | 2.7625047<br>38 | 0.0057359<br>73 | 0.0359554<br>22 | Cluster 5 |
| SAOUHSC_007<br>14  | YP_499273.1    | 391934<br>1 | saeS  | Histidine protein kinase SaeS (EC 2.7.13.3) (Sensor protein SaeS) (Staphylococcus exoprotein expression protein S)                                                                                                   | 562.56074<br>49 | 1.666210683 | 0.2416707<br>13 | 2.7566877<br>01 | 0.0058390<br>09 | 0.0365145<br>61 | #N/A      |
| SAOUHSC_005<br>33  | YP_499105.1    | 392038<br>6 | hchA  | Protein/nucleic acid deglycase HchA (EC 3.1.2.-) (EC 3.5.1.-) (EC 3.5.1.124) (Maillard deglycase)                                                                                                                    | 1116.4741<br>5  | 2.060783374 | 0.3861287<br>64 | 2.7472270<br>2  | 0.0060101<br>52 | 0.0374596<br>73 | Cluster 5 |
| SAOUHSC_009<br>26  | YP_499479.1    | 392081<br>3 |       | Oligopeptide ABC transporter, ATP-binding protein, putative                                                                                                                                                          | 456.07502<br>62 | 2.564326878 | 0.5695150<br>34 | 2.7467701<br>19 | 0.0060185<br>3  | 0.0374596<br>73 | Cluster 2 |
| SAOUHSC_028<br>91  | YP_501344.1    | 392134<br>3 |       | Uncharacterized protein                                                                                                                                                                                              | 56.307968<br>02 | 2.067142699 | 0.3889784<br>9  | 2.7434491<br>26 | 0.0060797<br>47 | 0.0377516<br>51 | Cluster 6 |
| SAOUHSC_007<br>17  | YP_499276.1    | 391934<br>4 |       | Uncharacterized protein                                                                                                                                                                                              | 206.49935<br>98 | 2.062862894 | 0.3889110<br>46 | 2.7329203<br>01 | 0.0062775<br>52 | 0.0388884<br>03 | #N/A      |
| SAOUHSC_002<br>66  | YP_498859.1    | 391920<br>7 |       | Uncharacterized protein                                                                                                                                                                                              | 18.898879<br>24 | 3.238216865 | 0.8198775<br>24 | 2.7299405<br>1  | 0.0063345<br>76 | 0.0391497<br>54 | Cluster 1 |
| SAOUHSC_016<br>67  | YP_500178.1    | 392007<br>9 | recO  | DNA repair protein RecO (Recombination protein O)                                                                                                                                                                    | 192.94271<br>75 | 1.687621811 | 0.2520093<br>8  | 2.7285564<br>13 | 0.0063612<br>21 | 0.0392225<br>75 | Cluster 1 |
| SAOUHSC_004<br>06  | YP_498992.1    | 392056<br>4 |       | Uncharacterized protein                                                                                                                                                                                              | 84.088994<br>92 | 2.140143291 | 0.4189113<br>54 | 2.7216815<br>19 | 0.0064950<br>7  | 0.0398804<br>7  | #N/A      |
| SAOUHSC_018<br>94  | YP_500395.1    | 392084<br>1 | arsC  | Arsenate reductase (EC 1.20.4.4)                                                                                                                                                                                     | 24.743728<br>02 | 2.344666584 | 0.4940856<br>73 | 2.7215251<br>38 | 0.0064981<br>44 | 0.0398804<br>7  | Cluster 5 |
| SAOUHSC_T00<br>057 | YP_502104<br>6 | 392104<br>6 |       |                                                                                                                                                                                                                      | 133.57719<br>83 | 2.091940946 | 0.4024199<br>87 | 2.7134361<br>64 | 0.0066589<br>4  | 0.0407592<br>47 | #N/A      |
| SAOUHSC_030<br>30  | YP_501478.1    | 392129<br>6 |       | Sodium, sulfate symporter, putative                                                                                                                                                                                  | 151.00503<br>25 | 2.268835873 | 0.4677260<br>29 | 2.7127758<br>42 | 0.0066722<br>22 | 0.0407592<br>47 | #N/A      |
| SAOUHSC_019<br>85  | YP_500482.1    | 392046<br>1 |       | Uncharacterized protein                                                                                                                                                                                              | 21.254387<br>51 | 2.307040307 | 0.4837964<br>94 | 2.7016324<br>47 | 0.0068999<br>99 | 0.0420533<br>44 | Cluster 6 |
| SAOUHSC_010<br>10  | YP_499560.1    | 392027<br>1 | purC  | Phosphoribosylaminoimidazole-succinocarboxamide synthase (EC 6.3.2.6) (SAICAR synthetase)                                                                                                                            | 33.984921<br>79 | 2.057886484 | 0.3936759<br>44 | 2.6872012<br>37 | 0.0072053<br>53 | 0.0437124<br>74 | Cluster 6 |
| SAOUHSC_011<br>28  | YP_499671.1    | 392072<br>8 | argF  | Ornithine carbamoyltransferase (OTCase) (EC 2.1.3.3)                                                                                                                                                                 | 37.967274<br>79 | 3.381564644 | 0.8860624<br>38 | 2.6878067<br>96 | 0.0071923<br>74 | 0.0437124<br>74 | #N/A      |
| SAOUHSC_013<br>88  | YP_499915.1    | 392067<br>9 |       | Uncharacterized protein                                                                                                                                                                                              | 2.1192495<br>07 | 3.789748999 | 1.0410206<br>38 | 2.6798210<br>3  | 0.0073661<br>53 | 0.0445855<br>01 | #N/A      |
| SAOUHSC_012<br>61  | YP_499794.1    | 391999<br>2 | cinA  | Putative competence-damage inducible protein                                                                                                                                                                         | 106.99133<br>16 | 1.630370627 | 0.2353757<br>9  | 2.6781455<br>55 | 0.0074031<br>04 | 0.0447066<br>16 | #N/A      |
| SAOUHSC_002<br>02  | YP_498799.1    | 392035<br>8 |       | Uncharacterized protein                                                                                                                                                                                              | 24.901173<br>29 | 2.844623371 | 0.6924446<br>31 | 2.6639290<br>55 | 0.0077233<br>85 | 0.0465342<br>76 | Cluster 1 |
| SAOUHSC_023<br>28  | YP_500807.1    | 392095<br>3 | thiE  | Thiamine-phosphate synthase (TP synthase) (TPS) (EC 2.5.1.3) (Thiamine-phosphate pyrophosphorylase) (TMP pyrophosphorylase) (TMP-PPase)                                                                              | 48.055702<br>18 | -2.76449922 | 0.6632605<br>4  | 2.6603410<br>16 | 0.0078061<br>57 | 0.0469258<br>51 | Cluster 1 |



|             |             |        |                                                                      |           |             |           |           |           |           |           |       |
|-------------|-------------|--------|----------------------------------------------------------------------|-----------|-------------|-----------|-----------|-----------|-----------|-----------|-------|
| SAOUHSC_024 |             | 391963 |                                                                      | 365.41175 |             | 0.2029945 | 2.6582172 | -         | 0.0078555 | 0.0471152 | Clust |
| 22          | YP_500893.1 | 2      | Uncharacterized protein                                              | 77        | -1.53960354 | 18        | 99        | 22        | 81        | er 1      |       |
| SAOUHSC_007 |             | 391934 |                                                                      | 339.13638 |             | -         | 0.3745021 | 2.6550047 | 0.0079307 | 0.0474584 |       |
| 16          | YP_499275.1 | 3      | Uncharacterized protein                                              | 65        | 1.994304998 | 56        | 4         | 29        | 92        | #N/A      |       |
| SAOUHSC_009 |             | 392075 | Oligopeptide ABC transporter,<br>substrate-binding protein, putative | 854.66369 |             | -         | 0.5563784 | 2.6518060 | 0.0080062 | 0.0478020 | Clust |
| 27          | YP_499480.1 | 6      |                                                                      | 38        | 2.475407844 | 99        | 06        | 53        | 38        | er 2      |       |

## HUVEC – 1 hpi vs. uninfected

| Gene_id                   | Name     | Description                                                            | baseMean    | log2FoldChange | lfcSE       | stat        | pvalue      | padj        | Cluster   |
|---------------------------|----------|------------------------------------------------------------------------|-------------|----------------|-------------|-------------|-------------|-------------|-----------|
| ENSG00000137834           | SMAD6    | SMAD family member 6                                                   | 674.9451836 | 3.981444431    | 0.10113655  | 29.47939626 | 5.2895E-191 | 1.2905E-186 | Cluster 1 |
| ENSG00000123358           | NR4A1    | nuclear receptor subfamily 4 group A member 1                          | 305.3721265 | 4.890970653    | 0.157025653 | 24.77920381 | 1.5025E-135 | 1.8328E-131 | Cluster 1 |
| ENSG00000099860           | GADD45B  | growth arrest and DNA damage inducible beta                            | 285.905419  | 3.365155196    | 0.127050516 | 18.61586455 | 2.38972E-77 | 1.9434E-73  | Cluster 1 |
| ENSG00000184557           | SOCS3    | suppressor of cytokine signaling 3                                     | 442.6331569 | 2.709056213    | 0.099976347 | 17.09460553 | 1.62794E-65 | 9.9292E-62  | Cluster 1 |
| ENSG00000134107           | BHLHE40  | basic helix-loop-helix family member e40                               | 440.0764106 | 2.838064742    | 0.111917367 | 16.42340945 | 1.30049E-60 | 6.34563E-57 | Cluster 1 |
| ENSG00000101665           | SMAD7    | SMAD family member 7                                                   | 193.0112481 | 4.185522219    | 0.195910827 | 16.26006214 | 1.89546E-59 | 7.70724E-56 | Cluster 1 |
| ENSG00000164683           | HEY1     | hes-related family bHLH transcription factor with YRPW motif 1         | 572.044014  | 3.34690483     | 0.144971552 | 16.18872668 | 6.0569E-59  | 2.111E-55   | Cluster 1 |
| ENSG00000119508           | NR4A3    | nuclear receptor subfamily 4 group A member 3                          | 67.78521619 | 5.52736599     | 0.304531125 | 14.86667741 | 5.42392E-50 | 1.65409E-46 | Cluster 1 |
| ENSG00000125968           | ID1      | inhibitor of DNA binding 1, dominant negative helix-loop-helix protein | 924.5457356 | 3.113625806    | 0.143007692 | 14.77980501 | 1.97738E-49 | 5.36023E-46 | Cluster 1 |
| ENSG00000168209           | DDIT4    | DNA damage inducible transcript 4                                      | 357.1116247 | 2.556959569    | 0.111448754 | 13.97018376 | 2.37014E-44 | 5.78244E-41 | Cluster 1 |
| ENSG00000124216           | SNAI1    | snail family zinc finger 1                                             | 98.26041099 | 3.883020665    | 0.209167493 | 13.78331126 | 3.21195E-43 | 7.12381E-40 | Cluster 1 |
| ENSG00000144655           | CSRN1    | cysteine-serine-rich nuclear protein 1                                 | 373.7582883 | 2.349231164    | 0.099603924 | 13.54596395 | 8.37078E-42 | 1.70185E-38 | Cluster 1 |
| ENSG00000127528           | KLF2     | Kruppel-like factor 2                                                  | 179.5183644 | 2.902645064    | 0.144836852 | 13.13647069 | 2.03499E-39 | 3.81905E-36 | Cluster 1 |
| ENSG00000168874           | ATOX1    | atonal bHLH transcription factor 8                                     | 132.4802169 | 3.146969551    | 0.167849717 | 12.79102277 | 1.84036E-37 | 3.20709E-34 | Cluster 1 |
| ENSG00000115738           | ID2      | inhibitor of DNA binding 2, dominant negative helix-loop-helix protein | 66.89790507 | 3.889105858    | 0.226871346 | 12.734556   | 3.80002E-37 | 6.1806E-34  | Cluster 1 |
| RP11-<br>ENSG00000259884  | 1100L3.8 |                                                                        | 55.97674707 | 4.627103848    | 0.286072671 | 12.67895965 | 7.73517E-37 | 1.17947E-33 | Cluster 1 |
| ENSG00000136826           | KLF4     | Kruppel-like factor 4 (gut)                                            | 178.2964331 | 3.796465332    | 0.228366366 | 12.24552187 | 1.77531E-34 | 2.54778E-31 | Cluster 1 |
| ENSG00000158050           | DUSP2    | dual specificity phosphatase 2                                         | 49.07874043 | 4.483489322    | 0.285474728 | 12.20244378 | 3.01633E-34 | 4.0883E-31  | Cluster 1 |
| CTD-<br>ENSG00000267519   | 3252C9.4 | uncharacterized LOC284454                                              | 251.7864741 | 2.62551686     | 0.137839278 | 11.79284227 | 4.24953E-32 | 5.45662E-29 | Cluster 1 |
| ENSG00000155090           | KLF10    | Kruppel-like factor 10                                                 | 541.7084343 | 2.795486644    | 0.1559153   | 11.51578226 | 1.09858E-30 | 1.3401E-27  | Cluster 1 |
| RP11-<br>ENSG00000269926  | 442H21.2 |                                                                        | 227.8929107 | 2.415322514    | 0.12302797  | 11.50407114 | 1.25837E-30 | 1.46192E-27 | Cluster 1 |
| ENSG00000171223           | JUNB     | jun B proto-oncogene                                                   | 671.0948894 | 2.725939037    | 0.156906709 | 10.99977845 | 3.83072E-28 | 4.24809E-25 | Cluster 1 |
| ENSG00000120129           | DUSP1    | dual specificity phosphatase 1                                         | 806.1876751 | 2.008467527    | 0.092941402 | 10.85057369 | 1.98178E-27 | 2.10215E-24 | Cluster 1 |
| ENSG00000125740           | FOSB     | FBJ murine osteosarcoma viral oncogene homolog B                       | 264.1794142 | 2.475756166    | 0.153045459 | 9.642600126 | 5.28325E-22 | 5.37064E-19 | Cluster 1 |
| ENSG00000120738           | EGR1     | early growth response 1                                                | 153.2056312 | 2.512169694    | 0.160202618 | 9.439107258 | 3.75969E-21 | 3.66901E-18 | Cluster 1 |
| RP11-<br>ENSG00000274995  | 321F6.2  |                                                                        | 35.87812511 | 3.597300218    | 0.275309354 | 9.434115406 | 3.94307E-21 | 3.69997E-18 | Cluster 1 |
| CH507-<br>ENSG00000275993 | 42P11.8  | serine/threonine-protein kinase SIK1                                   | 40.60013486 | 3.424293253    | 0.262670809 | 9.229397282 | 2.72159E-20 | 2.45921E-17 | Cluster 1 |
| ENSG00000187678           | SPRY4    | sprouty RTK signaling antagonist 4                                     | 194.9739607 | 2.230409976    | 0.136636584 | 9.004981959 | 2.15701E-19 | 1.87945E-16 | Cluster 1 |
| ENSG00000183337           | BCOR     | BCL6 corepressor                                                       | 197.4392785 | 2.107353628    | 0.124156656 | 8.919003314 | 4.70503E-19 | 3.95823E-16 | Cluster 1 |
| ENSG00000188483           | IER5L    | immediate early response 5-like                                        | 74.65353468 | 2.918771318    | 0.219357607 | 8.747229441 | 2.18655E-18 | 1.77817E-15 | Cluster 1 |
| ENSG00000106003           | LFNG     | LFNG O-fucosylpeptide 3-beta-N-acetylglucosaminyltransferase           | 64.22492354 | 2.94963925     | 0.222995191 | 8.742965461 | 2.2707E-18  | 1.78704E-15 | Cluster 1 |
| ENSG00000104419           | NDRG1    | N-myc downstream regulated 1                                           | 192.4564003 | 1.999688922    | 0.12142681  | 8.232851734 | 1.82808E-16 | 1.39374E-13 | Cluster 1 |
| ENSG00000179388           | EGR3     | early growth response 3                                                | 28.4407037  | 3.520756201    | 0.308627781 | 8.16762572  | 3.14518E-16 | 2.32524E-13 | Cluster 1 |
| ENSG00000160888           | IER2     | immediate early response 2                                             | 807.2127868 | 1.845600725    | 0.104154749 | 8.118695837 | 4.7122E-16  | 3.38128E-13 | Cluster 1 |
| ENSG00000163659           | TIPARP   | TCDD-inducible poly(ADP-ribose) polymerase                             | 608.9780369 | 1.904443682    | 0.1123002   | 8.053802971 | 8.02604E-16 | 5.59461E-13 | Cluster 1 |

|                 |               |                                                                                     |             |              |             |              |             |             |           |
|-----------------|---------------|-------------------------------------------------------------------------------------|-------------|--------------|-------------|--------------|-------------|-------------|-----------|
| ENSG00000166886 | NAB2          | NGFI-A binding protein 2 (EGR1 binding protein 2)                                   | 133.2573258 | 2.135471397  | 0.141071848 | 8.048887259  | 8.35502E-16 | 5.66215E-13 | Cluster 1 |
| ENSG00000198517 | MAFK          | v-maf avian musculoaponeurotic fibrosarcoma oncogene homolog K                      | 443.6311045 | 1.711187631  | 0.09512421  | 7.476410347  | 7.63802E-14 | 5.03635E-11 | Cluster 1 |
| ENSG00000165507 | C10orf10      | chromosome 10 open reading frame 10                                                 | 1750.765607 | -1.883396618 | 0.119354555 | -7.401448693 | 1.34707E-13 | 8.64853E-11 | Cluster 2 |
| ENSG00000168453 | HR            | hair growth associated                                                              | 18.26651729 | 3.433851324  | 0.35044678  | 6.944995548  | 3.78472E-12 | 2.36759E-09 | Cluster 1 |
| ENSG00000131196 | NFATC1        | nuclear factor of activated T-cells, cytoplasmic, calcineurin-dependent 1           | 116.6279011 | 2.275325409  | 0.184162352 | 6.925006094  | 4.35957E-12 | 2.65901E-09 | Cluster 1 |
| ENSG00000165943 | MOAP1         | modulator of apoptosis 1                                                            | 206.7542696 | 1.792749339  | 0.114942531 | 6.896919092  | 5.31424E-12 | 3.16223E-09 | Cluster 1 |
| ENSG00000183535 | COL18A1-AS1   | COL18A1 antisense RNA 1                                                             | 142.1293702 | 1.893683479  | 0.133322691 | 6.703161124  | 2.03958E-11 | 1.18476E-08 | Cluster 1 |
| ENSG00000183691 | NOG           | noggin                                                                              | 19.68092596 | 3.111918457  | 0.320270947 | 6.594161832  | 4.27665E-11 | 2.37535E-08 | Cluster 1 |
| ENSG00000167470 | MIDN          | midnolin                                                                            | 385.4685528 | 1.704618909  | 0.106859056 | 6.593909141  | 4.28394E-11 | 2.37535E-08 | Cluster 1 |
| ENSG00000117318 | ID3           | inhibitor of DNA binding 3, dominant negative helix-loop-helix protein              | 1170.831974 | 1.598421063  | 0.091514661 | 6.53907318   | 6.19012E-11 | 3.35601E-08 | Cluster 1 |
| ENSG00000006459 | KDM7A         | lysine (K)-specific demethylase 7A                                                  | 181.0438746 | 1.808844096  | 0.124929534 | 6.474402575  | 9.51878E-11 | 5.04847E-08 | Cluster 1 |
| ENSG00000176907 | C8orf4        | chromosome 8 open reading frame 4                                                   | 156.8549613 | 1.906666613  | 0.140270231 | 6.463713692  | 1.02164E-10 | 5.30319E-08 | Cluster 1 |
| ENSG00000119669 | IRF2BPL       | interferon regulatory factor 2 binding protein-like                                 | 201.8293169 | 1.911676944  | 0.14315203  | 6.36859251   | 1.90771E-10 | 9.69632E-08 | Cluster 1 |
| ENSG00000198576 | ARC           | activity-regulated cytoskeleton-associated protein                                  | 14.35283969 | 3.262053726  | 0.358955223 | 6.301771305  | 2.94263E-10 | 1.46513E-07 | Cluster 1 |
| ENSG00000197019 | SERTAD1       | SERTA domain containing 1                                                           | 122.2864114 | 1.907841573  | 0.148086192 | 6.130494424  | 8.76064E-10 | 4.27467E-07 | Cluster 1 |
| ENSG00000179348 | GATA2         | GATA binding protein 2                                                              | 240.8853556 | 1.668857299  | 0.113754191 | 5.879847525  | 4.10645E-09 | 1.96441E-06 | Cluster 1 |
| ENSG00000267598 | CTC-250/14.6  |                                                                                     | 516.6607016 | 1.696186888  | 0.121419646 | 5.733725222  | 9.82485E-09 | 4.09555E-06 | Cluster 1 |
| ENSG00000255112 | CHMP1B        | charged multivesicular body protein 1B                                              | 407.872288  | 1.613311285  | 0.107107793 | 5.726112605  | 1.02758E-08 | 4.73017E-06 | Cluster 1 |
| ENSG00000128594 | LRRC4         | leucine rich repeat containing 4                                                    | 49.72652253 | 2.187425809  | 0.216650856 | 5.480826757  | 4.23343E-08 | 1.91265E-05 | Cluster 1 |
| ENSG00000095066 | HOOK2         | hook microtubule-tethering protein 2                                                | 213.5378429 | 1.86641951   | 0.160331918 | 5.403911593  | 6.52031E-08 | 2.89229E-05 | Cluster 1 |
| ENSG00000187479 | C11orf96      | chromosome 11 open reading frame 96                                                 | 32.15503537 | 2.417384006  | 0.267100088 | 5.306565095  | 1.1171E-07  | 4.86678E-05 | Cluster 1 |
| ENSG00000172201 | ID4           | inhibitor of DNA binding 4, dominant negative helix-loop-helix protein              | 8.228193539 | 2.96515269   | 0.37828039  | 5.194963156  | 2.0476E-07  | 8.7641E-05  | Cluster 1 |
| ENSG00000279637 | RP11-196B3.1  |                                                                                     | 12.99036294 | 2.843768253  | 0.35638586  | 5.173516848  | 2.29728E-07 | 9.66325E-05 | Cluster 1 |
| ENSG00000224574 | COL18A1-AS2   | COL18A1 antisense RNA 2                                                             | 85.35670516 | 1.881816036  | 0.170707787 | 5.165646216  | 2.3961E-07  | 9.90806E-05 | Cluster 1 |
| ENSG00000184307 | ZDHHC23       | zinc finger, DHHC-type containing 23                                                | 57.27885591 | 2.119354245  | 0.225913033 | 4.954801544  | 7.24042E-07 | 0.000289581 | Cluster 1 |
| ENSG00000204055 | RP11-247A12.2 |                                                                                     | 36.52073983 | 2.359680152  | 0.274282446 | 4.957226289  | 7.15067E-07 | 0.000289581 | Cluster 1 |
| ENSG00000136603 | SKIL          | SKI-like proto-oncogene                                                             | 1262.333198 | 1.452237186  | 0.092185788 | 4.905714808  | 9.30877E-07 | 0.0003663   | Cluster 1 |
| ENSG00000153234 | NR4A2         | nuclear receptor subfamily 4 group A member 2                                       | 56.26448902 | 2.083872532  | 0.224789637 | 4.821719302  | 1.42326E-06 | 0.000551164 | Cluster 1 |
| ENSG00000100906 | NFKBIA        | nuclear factor of kappa light polypeptide gene enhancer in B-cells inhibitor, alpha | 446.213261  | 1.735130502  | 0.153274482 | 4.796170179  | 1.61728E-06 | 0.000616512 | Cluster 1 |
| ENSG00000161835 | GRASP         | GRP1 (general receptor for phosphoinositides 1)-associated scaffold protein         | 390.8042068 | 1.457628725  | 0.098278991 | 4.656424757  | 3.21748E-06 | 0.001207643 | Cluster 1 |
| ENSG00000117525 | F3            | coagulation factor III (thromboplastin, tissue factor)                              | 43.23278759 | 2.314236276  | 0.285282679 | 4.60678608   | 4.0894E-06  | 0.001511654 | Cluster 1 |
| ENSG00000181472 | ZBTB2         | zinc finger and BTB domain containing 2                                             | 74.86083751 | 1.864594228  | 0.189044989 | 4.573483964  | 4.7968E-06  | 0.001746681 | Cluster 1 |
| ENSG00000122863 | CHST3         | carbohydrate (chondroitin 6) sulfotransferase 3                                     | 95.92899446 | 1.725543812  | 0.161003833 | 4.506376026  | 6.59442E-06 | 0.002365942 | Cluster 1 |
| ENSG00000138166 | DUSP5         | dual specificity phosphatase 5                                                      | 289.2508738 | 1.87195128   | 0.19730668  | 4.419268919  | 9.90354E-06 | 0.003501689 | Cluster 1 |
| ENSG00000075426 | FOSL2         | FOS-like antigen 2                                                                  | 749.1466481 | 1.412037265  | 0.095178208 | 4.329113515  | 1.49711E-05 | 0.005217848 | Cluster 1 |
| ENSG00000171604 | CXXC5         | CXXC finger protein 5                                                               | 49.15066334 | 2.026095279  | 0.245680385 | 4.17654539   | 2.9597E-05  | 0.010170103 | Cluster 1 |

|                 |         |                                                  |             |             |             |             |             |             |           |
|-----------------|---------|--------------------------------------------------|-------------|-------------|-------------|-------------|-------------|-------------|-----------|
| ENSG00000106089 | STX1A   | syntaxin 1A                                      | 118.839296  | 1.603929783 | 0.14814826  | 4.07652297  | 4.57141E-05 | 0.01549011  | Cluster 1 |
| ENSG00000118515 | SGK1    | serum/gluocorticoid regulated kinase 1           | 835.5059714 | 1.50813358  | 0.127098282 | 3.997957895 | 6.38913E-05 | 0.021352827 | Cluster 1 |
| ENSG00000197461 | PDGFA   | platelet-derived growth factor alpha polypeptide | 149.4254818 | 1.636069473 | 0.160789755 | 3.955907977 | 7.62445E-05 | 0.02513699  | Cluster 1 |
| ENSG00000034152 | MAP2K3  | mitogen-activated protein kinase kinase 3        | 122.3304251 | 1.62408157  | 0.160449733 | 3.889576865 | 0.000100419 | 0.032665683 | Cluster 1 |
|                 |         | BHLHE40-                                         |             |             |             |             |             |             |           |
| ENSG00000235831 | AS1     | BHLHE40 antisense RNA 1                          | 23.08035673 | 2.156673929 | 0.299117912 | 3.866949727 | 0.000110205 | 0.035377298 | Cluster 1 |
| ENSG00000108551 | RASD1   | RAS, dexamethasone-induced 1                     | 38.8493548  | 1.911285904 | 0.236690526 | 3.85011568  | 0.000118062 | 0.037407271 | Cluster 1 |
|                 |         | RP11-                                            |             |             |             |             |             |             |           |
| ENSG00000267165 | 78A19.3 |                                                  | 160.5788058 | 1.567680688 | 0.14891797  | 3.81203618  | 0.000137827 | 0.043109717 | Cluster 1 |

HUVEC – 16 hpi vs. 1 hpi

| Gene_id         | Name          | Description                                                 | baseMean    | log2FoldChange | lfcSE       | stat         | pvalue      | padj        | Cluster   |
|-----------------|---------------|-------------------------------------------------------------|-------------|----------------|-------------|--------------|-------------|-------------|-----------|
| ENSG00000137834 | SMAD6         | SMAD family member 6                                        | 674.9451836 | -3.562797516   | 0.117484291 | -21.81395912 | 1.7102E-105 | 3.0763E-101 | Cluster 1 |
| ENSG00000119917 | IFIT3         | interferon induced protein with tetratricopeptide repeats 3 | 1394.543353 | 6.166134813    | 0.27951919  | 18.48221874  | 2.87127E-76 | 2.58242E-72 | Cluster 2 |
| ENSG00000140853 | NLRCS         | NLR family, CARD domain containing 5                        | 419.1782563 | 4.579751357    | 0.204000023 | 17.54779878  | 6.18303E-69 | 3.70735E-65 | Cluster 2 |
| ENSG00000128284 | APOL3         | apolipoprotein L, 3                                         | 452.955401  | 3.845172741    | 0.165723449 | 17.16819648  | 4.59476E-66 | 2.06626E-62 | Cluster 2 |
| ENSG00000152778 | IFIT5         | interferon induced protein with tetratricopeptide repeats 5 | 391.3525165 | 3.660575217    | 0.157578345 | 16.8841424   | 5.88655E-64 | 2.11774E-60 | Cluster 2 |
| ENSG00000184979 | USP18         | ubiquitin specific peptidase 18                             | 334.7952188 | 3.860069374    | 0.176324734 | 16.22046608  | 3.61442E-59 | 1.0836E-55  | Cluster 2 |
| ENSG00000165507 | C10orf10      | chromosome 10 open reading frame 10                         | 1750.765607 | 2.856602894    | 0.119864941 | 15.48912363  | 4.10853E-54 | 1.05577E-50 | Cluster 2 |
| ENSG00000138496 | PARP9         | poly(ADP-ribose) polymerase family member 9                 | 512.8227769 | 3.623858629    | 0.170489676 | 15.39013203  | 1.90643E-53 | 4.28661E-50 | Cluster 2 |
| ENSG00000123358 | NR4A1         | nuclear receptor subfamily 4 group A member 1               | 305.3721265 | -3.418704111   | 0.157337517 | -15.37271056 | 2.49508E-53 | 4.98684E-50 | Cluster 1 |
| ENSG00000135899 | SP110         | SP110 nuclear body protein                                  | 217.9349397 | 4.492065332    | 0.228136771 | 15.3068938   | 6.87707E-53 | 1.23705E-49 | Cluster 2 |
| ENSG00000185885 | IFITM1        | interferon induced transmembrane protein 1                  | 181.8742945 | 5.170855076    | 0.272949675 | 15.28067425  | 1.02871E-52 | 1.68222E-49 | Cluster 2 |
| ENSG00000257452 | RP1-71H24.1   |                                                             | 107.7353748 | 5.440308438    | 0.291022784 | 15.2575973   | 1.46546E-52 | 2.19672E-49 | Cluster 2 |
| ENSG00000099860 | GADD45B       | growth arrest and DNA damage inducible beta                 | 285.905419  | -3.422670737   | 0.159026532 | -15.23438077 | 2.09099E-52 | 2.89328E-49 | Cluster 1 |
| ENSG00000068079 | IFI35         | interferon induced protein 35                               | 274.7578354 | 4.619886162    | 0.240190504 | 15.07089621  | 2.51676E-51 | 3.23367E-48 | Cluster 2 |
| ENSG00000089127 | OAS1          | 2'-5'-oligoadenylate synthetase 1                           | 432.480613  | 5.661250168    | 0.309566831 | 15.05733075  | 3.09014E-51 | 3.70569E-48 | Cluster 2 |
| ENSG00000101347 | SAMHD1        | SAM domain and HD domain 1                                  | 537.7034743 | 3.231628737    | 0.148531879 | 15.02457758  | 5.06834E-51 | 5.69808E-48 | Cluster 2 |
| ENSG00000128335 | APOL2         | apolipoprotein L, 2                                         | 631.6611184 | 3.369435377    | 0.158559805 | 14.94348069  | 1.71764E-50 | 1.81747E-47 | Cluster 2 |
| ENSG00000168961 | LGALS9        | lectin, galactoside-binding, soluble, 9                     | 261.3994593 | 3.508910322    | 0.171640992 | 14.61719773  | 2.18198E-48 | 2.18053E-45 | Cluster 2 |
| ENSG00000263069 | CTD-2047H16.4 | uncharacterized LOC100294362                                | 415.8456059 | 3.585288592    | 0.179159675 | 14.43008086  | 3.34689E-47 | 3.01019E-44 | Cluster 2 |
| ENSG00000130589 | HELZ2         | helicase with zinc finger 2, transcriptional coactivator    | 2035.697532 | 4.123959994    | 0.216482931 | 14.43051412  | 3.32593E-47 | 3.01019E-44 | Cluster 2 |
| ENSG00000134326 | CMPK2         | cytidine monophosphate (UMP-CMP) kinase 2, mitochondrial    | 531.4512502 | 5.049627441    | 0.288568038 | 14.0335273   | 9.71946E-45 | 8.32541E-42 | Cluster 2 |
| ENSG00000130303 | BST2          | bone marrow stromal cell antigen 2                          | 397.1495681 | 3.443082447    | 0.174605102 | 13.99204504  | 1.74326E-44 | 1.42535E-41 | Cluster 2 |
| ENSG00000130813 | C19orf66      | chromosome 19 open reading frame 66                         | 348.5192544 | 3.382414254    | 0.17394466  | 13.69639205  | 1.06696E-42 | 8.34453E-40 | Cluster 2 |
| ENSG00000101665 | SMAD7         | SMAD family member 7                                        | 193.0112481 | -4.24210079    | 0.23731558  | -13.66155895 | 1.72256E-42 | 1.29106E-39 | Cluster 1 |
| ENSG00000119922 | IFIT2         | interferon induced protein with tetratricopeptide repeats 2 | 920.0274502 | 5.584192354    | 0.3375118   | 13.58231729  | 5.09874E-42 | 3.66864E-39 | Cluster 2 |
| ENSG00000060491 | OGFR          | opioid growth factor receptor                               | 426.9608299 | 2.480699909    | 0.110059228 | 13.45366437  | 2.92985E-41 | 2.02701E-38 | Cluster 2 |
| ENSG00000187608 | ISG15         | ISG15 ubiquitin-like modifier                               | 1434.920784 | 4.390123133    | 0.255275294 | 13.28026333  | 3.01333E-40 | 2.00754E-37 | Cluster 2 |
| ENSG00000181381 | DDX60L        | DEAD (Asp-Glu-Ala-Asp) box polypeptide 60-like              | 1813.790747 | 3.77342923     | 0.210218789 | 13.19306066  | 9.61988E-40 | 6.18008E-37 | Cluster 2 |
| ENSG00000280755 | AC009950.1    | SP110 nuclear body protein                                  | 150.438364  | 4.241663299    | 0.24765575  | 13.08939241  | 3.78624E-39 | 2.34852E-36 | Cluster 2 |
| ENSG00000185507 | IRF7          | interferon regulatory factor 7                              | 208.6698546 | 3.366813198    | 0.180930625 | 13.08132989  | 4.21009E-39 | 2.52437E-36 | Cluster 2 |
| ENSG00000002549 | LAP3          | leucine aminopeptidase 3                                    | 1368.79701  | 2.524792422    | 0.117155669 | 13.01509722  | 1.00414E-38 | 5.79997E-36 | Cluster 2 |
| ENSG00000111331 | OAS3          | 2'-5'-oligoadenylate synthetase 3                           | 940.0457269 | 4.610156555    | 0.277426452 | 13.01302213  | 1.03179E-38 | 5.79997E-36 | Cluster 2 |
| ENSG00000225886 | RP11-288L9.4  |                                                             | 62.80870824 | 5.436656459    | 0.341050677 | 13.00878948  | 1.09056E-38 | 5.94454E-36 | Cluster 2 |
| ENSG00000184557 | SOCS3         | suppressor of cytokine signaling 3                          | 442.6331569 | -2.505050575   | 0.115903049 | -12.98542695 | 1.4801E-38  | 7.83063E-36 | Cluster 1 |
| ENSG00000183486 | MX2           | MX dynamin-like GTPase 2                                    | 356.0366428 | 5.651022411    | 0.359341102 | 12.94319629  | 2.56722E-38 | 1.31941E-35 | Cluster 2 |
| ENSG00000120129 | DUSP1         | dual specificity phosphatase 1                              | 806.1876751 | -2.32586667    | 0.104573075 | -12.67885327 | 7.74567E-37 | 3.87026E-34 | Cluster 1 |

|                 |               |                                                                            |             |              |             |              |             |             |           |
|-----------------|---------------|----------------------------------------------------------------------------|-------------|--------------|-------------|--------------|-------------|-------------|-----------|
| ENSG00000115415 | STAT1         | signal transducer and activator of transcription 1                         | 2768.269437 | 2.824959453  | 0.144068196 | 12.66733048  | 8.97158E-37 | 4.36164E-34 | Cluster 2 |
| ENSG00000115267 | IFIH1         | interferon induced, with helicase C domain 1                               | 628.4811053 | 4.646355748  | 0.288783356 | 12.62661326  | 1.50623E-36 | 7.13E-34    | Cluster 2 |
| ENSG00000178685 | PARP10        | poly(ADP-ribose) polymerase family member 10                               | 437.1153032 | 2.724197018  | 0.13688579  | 12.59588029  | 2.22464E-36 | 1.02607E-33 | Cluster 2 |
| ENSG00000156587 | UBE2L6        | ubiquitin conjugating enzyme E2L 6                                         | 248.47387   | 3.067203665  | 0.164608538 | 12.55830158  | 3.57934E-36 | 1.60963E-33 | Cluster 2 |
| ENSG00000172183 | ISG20         | interferon stimulated exonuclease gene 20kDa                               | 181.6549416 | 4.147419985  | 0.250715115 | 12.55377039  | 3.79023E-36 | 1.6629E-33  | Cluster 2 |
| ENSG00000173821 | RNF213        | ring finger protein 213                                                    | 6329.405111 | 3.465900868  | 0.196546425 | 12.54614969  | 4.17313E-36 | 1.78729E-33 | Cluster 2 |
| ENSG00000134107 | BHLHE40       | basic helix-loop-helix family member e40                                   | 440.0764106 | -2.58005518  | 0.12643387  | -12.49708785 | 7.74363E-36 | 3.23936E-33 | Cluster 1 |
| ENSG00000280248 | CTD-2047H16.3 |                                                                            | 224.3860078 | 3.509595843  | 0.207685746 | 12.08362101  | 1.28915E-33 | 5.27028E-31 | Cluster 2 |
| ENSG00000168874 | ATOX8         | atonal bHLH transcription factor 8                                         | 132.4802169 | -3.744222553 | 0.227636502 | -12.05528341 | 1.81906E-33 | 7.27138E-31 | Cluster 1 |
| ENSG00000168062 | BATF2         | basic leucine zipper transcription factor, ATF-like 2                      | 83.01637811 | 4.823142775  | 0.317247188 | 12.05099026  | 1.91634E-33 | 7.49371E-31 | Cluster 2 |
| ENSG00000138642 | HERC6         | HECT and RLD domain containing E3 ubiquitin protein ligase family member 6 | 457.1481929 | 4.224616394  | 0.268871183 | 11.99316474  | 3.85875E-33 | 1.47684E-30 | Cluster 2 |
| ENSG00000221963 | APOL6         | apolipoprotein L, 6                                                        | 631.5877576 | 4.683702862  | 0.310407182 | 11.86732483  | 1.74974E-32 | 6.55713E-30 | Cluster 2 |
| ENSG00000138035 | PNPT1         | polyribonucleotide nucleotidyltransferase 1                                | 574.7822674 | 2.748553428  | 0.149083469 | 11.72868759  | 9.08565E-32 | 3.33536E-29 | Cluster 2 |
| ENSG00000121060 | TRIM25        | tripartite motif containing 25                                             | 866.691858  | 2.223956688  | 0.104583145 | 11.70319265  | 1.22747E-31 | 4.41594E-29 | Cluster 2 |
| ENSG00000119508 | NR4A3         | nuclear receptor subfamily 4 group A member 3                              | 67.78521619 | -4.891439234 | 0.332720343 | -11.69582597 | 1.33878E-31 | 4.72196E-29 | Cluster 1 |
| ENSG00000157601 | MX1           | MX dynamin-like GTPase 1                                                   | 3295.228182 | 5.118753758  | 0.352309548 | 11.69072421  | 1.42169E-31 | 4.91796E-29 | Cluster 2 |
| ENSG00000137965 | IFI44         | interferon induced protein 44                                              | 777.1401967 | 4.499301859  | 0.301990047 | 11.58747413  | 4.76992E-31 | 1.61889E-28 | Cluster 2 |
| ENSG00000228318 | AP001610.5    |                                                                            | 733.0868016 | 5.121742537  | 0.356279033 | 11.56886078  | 5.92643E-31 | 1.97416E-28 | Cluster 2 |
| ENSG00000205413 | SAMD9         | sterile alpha motif domain containing 9                                    | 657.1221937 | 3.848622917  | 0.250754933 | 11.36018693  | 6.60033E-30 | 2.15867E-27 | Cluster 2 |
| ENSG00000111335 | OAS2          | 2'-5'-oligoadenylate synthetase 2                                          | 764.0131342 | 4.983442866  | 0.35082349  | 11.35455004  | 7.04014E-30 | 2.26139E-27 | Cluster 2 |
| ENSG00000185745 | IFIT1         | interferon induced protein with tetratricopeptide repeats 1                | 1399.14554  | 5.152189004  | 0.369137566 | 11.24835126  | 2.35962E-29 | 7.44645E-27 | Cluster 2 |
| ENSG00000164683 | HEY1          | hes-related family bHLH transcription factor with YRPW motif 1             | 572.044014  | -2.713515537 | 0.152512904 | -11.23521675 | 2.73821E-29 | 8.49223E-27 | Cluster 1 |
| ENSG00000124201 | ZNF1          | zinc finger, NFX1-type containing 1                                        | 962.249264  | 2.697199194  | 0.151624072 | 11.19346796  | 4.38924E-29 | 1.3382E-26  | Cluster 2 |
| ENSG00000125968 | ID1           | inhibitor of DNA binding 1, dominant negative helix-loop-helix protein     | 924.5457356 | -2.644311275 | 0.14838671  | -11.08125706 | 1.54685E-28 | 4.63747E-26 | Cluster 1 |
| ENSG00000067066 | SP100         | SP100 nuclear antigen                                                      | 803.3625513 | 2.32886383   | 0.120053204 | 11.06895761  | 1.77453E-28 | 5.23282E-26 | Cluster 2 |
| ENSG00000173193 | PARP14        | poly(ADP-ribose) polymerase family member 14                               | 3230.511171 | 3.529637657  | 0.229081567 | 11.04251946  | 2.38257E-28 | 6.91253E-26 | Cluster 2 |
| ENSG00000138646 | HERC5         | HECT and RLD domain containing E3 ubiquitin protein ligase 5               | 376.7845114 | 4.442732638  | 0.312537463 | 11.0154239   | 3.22017E-28 | 9.19436E-26 | Cluster 2 |
| ENSG00000225963 | AC009950.2    |                                                                            | 45.38416995 | 4.508686056  | 0.322909997 | 10.86583285  | 1.67686E-27 | 4.71303E-25 | Cluster 2 |
| ENSG00000124216 | SNAI1         | snail family zinc finger 1                                                 | 98.26041099 | -3.722951963 | 0.252875722 | -10.76794538 | 4.87765E-27 | 1.34983E-24 | Cluster 1 |
| ENSG00000107201 | DDX58         | DEAD (Asp-Glu-Ala-Asp) box polypeptide 58                                  | 1210.566667 | 3.928502501  | 0.272206264 | 10.75839496  | 5.41043E-27 | 1.47459E-24 | Cluster 2 |
| ENSG00000267387 | CTD-2240E14.4 |                                                                            | 124.3228533 | 3.289002273  | 0.212972652 | 10.74786952  | 6.06462E-27 | 1.62821E-24 | Cluster 2 |
| ENSG00000267519 | CTD-3252C9.4  | uncharacterized LOC284454                                                  | 251.7864741 | -2.735645552 | 0.162129993 | -10.70527123 | 9.61487E-27 | 2.54342E-24 | Cluster 1 |
| ENSG00000158050 | DUSP2         | dual specificity phosphatase 2                                             | 49.07874043 | -4.593652108 | 0.337824825 | -10.63761998 | 1.99151E-26 | 5.19179E-24 | Cluster 1 |
| ENSG00000188313 | PLSCR1        | phospholipid scramblase 1                                                  | 465.2297432 | 2.53862913   | 0.145544383 | 10.57154592  | 4.03783E-26 | 1.03761E-23 | Cluster 2 |
| ENSG00000100342 | APOL1         | apolipoprotein L1                                                          | 222.1961015 | 3.325405     | 0.220625162 | 10.54007156  | 5.64559E-26 | 1.43032E-23 | Cluster 2 |
| ENSG00000134321 | RSAD2         | radical S-adenosyl methionine domain containing 2                          | 1354.259541 | 4.95319564   | 0.37547043  | 10.52864707  | 6.3744E-26  | 1.58599E-23 | Cluster 2 |
| ENSG00000170581 | STAT2         | signal transducer and activator of transcription 2                         | 901.7025303 | 2.635576241  | 0.155358778 | 10.52773625  | 6.43637E-26 | 1.58599E-23 | Cluster 2 |
| ENSG00000240065 | PSMB9         | proteasome subunit beta 9                                                  | 68.55825235 | 4.080954196  | 0.293299691 | 10.50445769  | 8.2395E-26  | 2.00287E-23 | Cluster 2 |

|                 |                   |                                                                        |             |              |             |              |             |             |           |
|-----------------|-------------------|------------------------------------------------------------------------|-------------|--------------|-------------|--------------|-------------|-------------|-----------|
| ENSG00000204267 | TAP2              | transporter 2, ATP-binding cassette, sub-family B (MDR/TAP)            | 390.8166902 | 2.769836096  | 0.169268873 | 10.45576815  | 1.37877E-25 | 3.30684E-23 | Cluster 2 |
| ENSG00000125740 | FOSB              | FBI murine osteosarcoma viral oncogene homolog B                       | 264.1794142 | -2.840623952 | 0.177366943 | -10.37749157 | 3.13915E-25 | 7.42987E-23 | Cluster 1 |
| ENSG00000108771 | DHX58             | DEXH (Asp-Glu-X-His) box polypeptide 58                                | 123.4589312 | 3.707047794  | 0.263036398 | 10.2915331   | 7.69414E-25 | 1.79743E-22 | Cluster 2 |
| ENSG00000276863 | CTD-2047H16.5     |                                                                        | 147.6465321 | 3.15671211   | 0.211073721 | 10.21781442  | 1.65019E-24 | 3.8056E-22  | Cluster 2 |
| ENSG00000204261 | PSMB8-AS1         | PSMB8 antisense RNA 1 (head to head)                                   | 156.4121888 | 3.561598542  | 0.25227463  | 10.15400772  | 3.18029E-24 | 7.24139E-22 | Cluster 2 |
| ENSG00000132530 | XAF1              | XIAP associated factor 1                                               | 332.0599535 | 3.741330451  | 0.272144451 | 10.07307126  | 7.26726E-24 | 1.63404E-21 | Cluster 2 |
| ENSG00000055332 | EIF2AK2           | eukaryotic translation initiation factor 2 alpha kinase 2              | 954.9186499 | 2.516222751  | 0.151445563 | 10.01166839  | 1.35449E-23 | 3.00797E-21 | Cluster 2 |
| ENSG00000135114 | OASL              | 2'-5'-oligoadenylate synthetase-like                                   | 1123.835101 | 4.752300058  | 0.37801059  | 9.926441636  | 3.19453E-23 | 7.0077E-21  | Cluster 2 |
| ENSG00000160932 | LY6E              | lymphocyte antigen 6 complex, locus E                                  | 332.6783787 | 2.499575736  | 0.151130696 | 9.922376949  | 3.32736E-23 | 7.21116E-21 | Cluster 2 |
| ENSG00000059378 | PARP12            | poly(ADP-ribose) polymerase family member 12                           | 571.0561791 | 2.212721182  | 0.12275917  | 9.915928713  | 3.5494E-23  | 7.60079E-21 | Cluster 2 |
| ENSG00000177409 | SAMD9L            | sterile alpha motif domain containing 9-like                           | 805.651111  | 3.464843461  | 0.254407882 | 9.688549901  | 3.37283E-22 | 7.13771E-20 | Cluster 2 |
| ENSG00000250264 | XXbac-BPG246D15.9 |                                                                        | 251.6781398 | 2.656482654  | 0.17239673  | 9.608550314  | 7.35776E-22 | 1.53897E-19 | Cluster 2 |
| ENSG00000187678 | SPRY4             | sprouty RTK signaling antagonist 4                                     | 194.9739607 | -2.616321609 | 0.168281695 | -9.604856965 | 7.62637E-22 | 1.57682E-19 | Cluster 1 |
| ENSG00000133106 | EPST11            | epithelial stromal interaction 1 (breast)                              | 437.8594816 | 4.55126232   | 0.371925246 | 9.548322833  | 1.31813E-21 | 2.69437E-19 | Cluster 2 |
| ENSG00000112773 | FAM46A            | family with sequence similarity 46 member A                            | 73.06726952 | 3.410505033  | 0.25353666  | 9.507520665  | 1.95261E-21 | 3.94646E-19 | Cluster 2 |
| ENSG00000259884 | RP11-1100L3.8     |                                                                        | 55.97674707 | -3.967699273 | 0.314145063 | -9.446907249 | 3.4899E-21  | 6.97514E-19 | Cluster 1 |
| ENSG00000101342 | TLDC2             | TBC/LysM-associated domain containing 2                                | 65.56340199 | 3.265403356  | 0.242521725 | 9.341032681  | 9.5399E-21  | 1.88576E-18 | Cluster 2 |
| ENSG00000183337 | BCOR              | BCL6 corepressor                                                       | 197.4392785 | -2.448348884 | 0.155719766 | -9.300995784 | 1.39136E-20 | 2.72042E-18 | Cluster 1 |
| ENSG00000155090 | KLF10             | Kruppel-like factor 10                                                 | 541.7084343 | -2.525476262 | 0.164312094 | -9.284016919 | 1.63207E-20 | 3.15674E-18 | Cluster 1 |
| ENSG00000130812 | ANGPTL6           | angiopoietin like 6                                                    | 96.75376562 | 3.26607005   | 0.245091582 | 9.245809371  | 2.33467E-20 | 4.46766E-18 | Cluster 2 |
| ENSG00000115738 | ID2               | inhibitor of DNA binding 2, dominant negative helix-loop-helix protein | 66.89790507 | -3.451250953 | 0.26588011  | -9.219384446 | 2.98811E-20 | 5.6579E-18  | Cluster 1 |
| ENSG00000148677 | ANKRD1            | ankyrin repeat domain 1 (cardiac muscle)                               | 1837.006254 | -1.616757452 | 0.067219867 | -9.175225651 | 4.5063E-20  | 8.44367E-18 | Cluster 1 |
| ENSG00000168394 | TAP1              | transporter 1, ATP-binding cassette, sub-family B (MDR/TAP)            | 688.4815401 | 3.522058832  | 0.277209377 | 9.098028557  | 9.19863E-20 | 1.70582E-17 | Cluster 2 |
| ENSG00000163644 | PPM1K             | protein phosphatase, Mg <sup>2+</sup> /Mn <sup>2+</sup> dependent 1K   | 290.6755824 | 2.633670081  | 0.179840559 | 9.083991364  | 1.04665E-19 | 1.92113E-17 | Cluster 2 |
| ENSG00000118515 | SGK1              | serum/glucocorticoid regulated kinase 1                                | 835.5059714 | -2.221530638 | 0.136169463 | -8.970664999 | 2.9473E-19  | 5.35515E-17 | Cluster 1 |
| ENSG00000131203 | IDO1              | indoleamine 2,3-dioxygenase 1                                          | 48.17855099 | 4.316677479  | 0.370655903 | 8.948130728  | 3.61553E-19 | 6.50361E-17 | Cluster 2 |
| ENSG00000197536 | C5orf56           |                                                                        | 111.5178767 | 3.07053371   | 0.232568522 | 8.902897467  | 5.44074E-19 | 9.68991E-17 | Cluster 2 |
| ENSG00000169248 | CXCL11            | chemokine (C-X-C motif) ligand 11                                      | 699.2194082 | 4.294645839  | 0.37100054  | 8.880434086  | 6.65999E-19 | 1.17451E-16 | Cluster 2 |
| ENSG00000106003 | LFNG              | LFNG O-fucosylpeptide 3-beta-N-acetylglucosaminyltransferase           | 64.22492354 | -3.527545678 | 0.285154765 | -8.863767995 | 7.73546E-19 | 1.35093E-16 | Cluster 1 |
| ENSG00000234745 | HLA-B             | major histocompatibility complex, class I, B                           | 781.498232  | 2.489327085  | 0.169943643 | 8.763652826  | 1.89023E-18 | 3.26938E-16 | Cluster 2 |
| ENSG00000132109 | TRIM21            | tripartite motif containing 21                                         | 164.9208847 | 2.46501526   | 0.168021706 | 8.719202372  | 2.80168E-18 | 4.79969E-16 | Cluster 2 |
| ENSG00000234290 | AC116366.6        | uncharacterized LOC105379175                                           | 47.52537818 | 3.512044432  | 0.291174853 | 8.627271234  | 6.2833E-18  | 1.06626E-15 | Cluster 2 |
| ENSG00000132470 | ITGB4             | integrin beta 4                                                        | 90.12607484 | 2.915225172  | 0.222412573 | 8.611137155  | 7.23394E-18 | 1.21611E-15 | Cluster 2 |
| ENSG00000136514 | RTP4              | receptor (chemosensory) transporter protein 4                          | 29.15871251 | 4.036607333  | 0.353357696 | 8.593579167  | 8.43014E-18 | 1.40409E-15 | Cluster 2 |
| ENSG00000132274 | TRIM22            | tripartite motif containing 22                                         | 1347.27451  | 2.247172052  | 0.145415775 | 8.5765939    | 9.77239E-18 | 1.61271E-15 | Cluster 2 |
| ENSG00000120738 | EGR1              | early growth response 1                                                | 153.2056312 | -2.630402246 | 0.19023521  | -8.570454667 | 1.03077E-17 | 1.68559E-15 | Cluster 1 |
| ENSG00000274995 | RP11-321F6.2      |                                                                        | 35.87812511 | -3.825124281 | 0.331478773 | -8.522790942 | 1.55754E-17 | 2.52405E-15 | Cluster 1 |
| ENSG00000162654 | GBP4              | guanylate binding protein 4                                            | 1341.692457 | 3.846743585  | 0.336821365 | 8.451790421  | 2.86869E-17 | 4.60732E-15 | Cluster 2 |

|                           |              |                                                                      |             |              |             |              |             |             |           |
|---------------------------|--------------|----------------------------------------------------------------------|-------------|--------------|-------------|--------------|-------------|-------------|-----------|
| ENSG00000166750           | SLFN5        | schlafen family member 5                                             | 671.1521348 | 2.354319688  | 0.161133102 | 8.404974938  | 4.27953E-17 | 6.81241E-15 | Cluster 2 |
| CH507-<br>ENSG00000275993 | 42P11.8      | serine/threonine-protein kinase SIK1                                 | 40.60013486 | -3.67792985  | 0.320121132 | -8.365364183 | 5.99295E-17 | 9.45625E-15 | Cluster 1 |
| ENSG00000182179           | UBA7         | ubiquitin-like modifier activating enzyme 7                          | 287.0727325 | 2.295452237  | 0.154977173 | 8.358987407  | 6.32589E-17 | 9.89479E-15 | Cluster 2 |
| ENSG00000140464           | PML          | promyelocytic leukemia                                               | 418.6767923 | 2.3619082    | 0.163172809 | 8.346416365  | 7.03654E-17 | 1.09115E-14 | Cluster 2 |
| ENSG00000188483           | IER5L        | immediate early response 5-like                                      | 74.65353468 | -3.233505761 | 0.26771512  | -8.342845037 | 7.25242E-17 | 1.11501E-14 | Cluster 1 |
| ENSG00000106785           | TRIM14       | tripartite motif containing 14                                       | 212.908226  | 2.226459855  | 0.14742281  | 8.319335737  | 8.84577E-17 | 1.34845E-14 | Cluster 2 |
| ENSG00000172936           | MYD88        | myeloid differentiation primary response 88                          | 222.8247188 | 2.280722989  | 0.155600141 | 8.230860075  | 1.85874E-16 | 2.80966E-14 | Cluster 2 |
| ENSG00000126709           | IFI6         | interferon, alpha-inducible protein 6                                | 835.6537911 | 3.676485003  | 0.32544024  | 8.224198105  | 1.96501E-16 | 2.94555E-14 | Cluster 2 |
| ENSG00000110446           | SLC15A3      | solute carrier family 15 (oligopeptide transporter), member 3        | 98.8390244  | 3.00223587   | 0.245615631 | 8.151907351  | 3.58229E-16 | 5.32547E-14 | Cluster 2 |
| ENSG00000141574           | SECTM1       | secreted and transmembrane 1                                         | 47.04872313 | 4.024250885  | 0.371851721 | 8.132948458  | 4.18973E-16 | 6.17744E-14 | Cluster 2 |
| ENSG00000165943           | MOAP1        | modulator of apoptosis 1                                             | 206.7542696 | -2.160369289 | 0.144103478 | -8.052333651 | 8.12301E-16 | 1.18794E-13 | Cluster 1 |
| ENSG00000137959           | IFI44L       | interferon induced protein 44 like                                   | 1784.087937 | 4.017728917  | 0.376155239 | 8.022562514  | 1.03562E-15 | 1.49172E-13 | Cluster 2 |
| ENSG00000265972           | TXNIP        | thioredoxin interacting protein                                      | 187.4592249 | 2.723376184  | 0.214819311 | 8.022445363  | 1.03661E-15 | 1.49172E-13 | Cluster 2 |
| ENSG00000179388           | EGR3         | early growth response 3                                              | 28.4407037  | -3.799292791 | 0.351322626 | -7.967869381 | 1.61433E-15 | 2.30465E-13 | Cluster 1 |
| ENSG00000155287           | SLC25A28     | solute carrier family 25 (mitochondrial iron transporter), member 28 | 155.0327851 | 2.659661746  | 0.209177534 | 7.934225595  | 2.11813E-15 | 3.00007E-13 | Cluster 2 |
| ENSG00000173786           | CNP          | 2',3'-cyclic nucleotide 3' phosphodiesterase                         | 1024.102411 | 1.955578068  | 0.121366303 | 7.873503967  | 3.44844E-15 | 4.84614E-13 | Cluster 2 |
| ENSG00000198517           | MAFK         | v-maf avian musculoaponeurotic fibrosarcoma oncogene homolog K       | 443.6311045 | -1.858909069 | 0.110064164 | -7.803712293 | 6.01121E-15 | 8.38215E-13 | Cluster 1 |
| ENSG00000131979           | GCH1         | GTP cyclohydrolase 1                                                 | 143.3497883 | 2.971398345  | 0.252708183 | 7.801086313  | 6.13765E-15 | 8.49262E-13 | Cluster 2 |
| ENSG00000163840           | DTX3L        | deltex 3 like, E3 ubiquitin ligase                                   | 587.8976362 | 2.949708699  | 0.250773926 | 7.774766436  | 7.55867E-15 | 1.03329E-12 | Cluster 2 |
| ENSG00000204264           | PSMB8        | proteasome subunit beta 8                                            | 209.3800008 | 2.146285615  | 0.147444214 | 7.774368219  | 7.58249E-15 | 1.03329E-12 | Cluster 2 |
| ENSG00000266728           | AC015688.3   |                                                                      | 106.8314222 | 2.409287551  | 0.191392728 | 7.363328624  | 1.7938E-13  | 2.42608E-11 | Cluster 2 |
| ENSG00000168016           | TRANK1       | tetratricopeptide repeat and ankyrin repeat containing 1             | 293.1633185 | 2.402890385  | 0.190663151 | 7.357952364  | 1.86753E-13 | 2.50695E-11 | Cluster 2 |
| ENSG00000185201           | IFITM2       | interferon induced transmembrane protein 2                           | 207.0203681 | 2.516685645  | 0.207082215 | 7.324074851  | 2.40552E-13 | 3.20523E-11 | Cluster 2 |
| ENSG00000137198           | GMPR         | guanosine monophosphate reductase                                    | 193.6646801 | 2.493119529  | 0.204676441 | 7.295023899  | 2.98606E-13 | 3.9495E-11  | Cluster 2 |
| XXbac-<br>ENSG00000271581 | BPG248L24.12 |                                                                      | 230.4336802 | 2.565370865  | 0.215386817 | 7.267719009  | 3.65608E-13 | 4.77482E-11 | Cluster 2 |
| ENSG00000105939           | ZC3HAV1      | zinc finger CCCH-type, antiviral 1                                   | 697.5668898 | 2.197793583  | 0.164816019 | 7.267458518  | 3.66314E-13 | 4.77482E-11 | Cluster 2 |
| ENSG00000137628           | DDX60        | DEAD (Asp-Glu-Ala-Asp) box polypeptide 60                            | 311.1276007 | 2.422040945  | 0.195800111 | 7.262717787  | 3.79389E-13 | 4.90968E-11 | Cluster 2 |
| ENSG00000144655           | CSRNP1       | cysteine-serine-rich nuclear protein 1                               | 373.7582883 | -1.779724803 | 0.110211576 | -7.074799504 | 1.49665E-12 | 1.92298E-10 | Cluster 1 |
| ENSG00000204525           | HLA-C        | major histocompatibility complex, class I, C                         | 772.0531872 | 2.057291958  | 0.149776291 | 7.059140994  | 1.67535E-12 | 2.13732E-10 | Cluster 2 |
| ENSG00000271503           | CCL5         | chemokine (C-C motif) ligand 5                                       | 24.53621412 | 3.632863691  | 0.37633579  | 6.996049168  | 2.63281E-12 | 3.33514E-10 | Cluster 2 |
| ENSG00000121858           | TNFSF10      | tumor necrosis factor superfamily member 10                          | 843.7576164 | 3.173747691  | 0.311347754 | 6.981735575  | 2.91556E-12 | 3.66748E-10 | Cluster 2 |
| ENSG00000117228           | GBP1         | guanylate binding protein 1, interferon-inducible                    | 579.6687074 | 3.155147716  | 0.309224936 | 6.969514641  | 3.18036E-12 | 3.9728E-10  | Cluster 2 |
| ENSG00000183691           | NOG          | noggin                                                               | 19.68092596 | -3.474636986 | 0.358496263 | -6.902825053 | 5.09784E-12 | 6.32413E-10 | Cluster 1 |
| ENSG00000010030           | ETV7         | ets variant 7                                                        | 25.25225197 | 3.557963965  | 0.371018292 | 6.894441652  | 5.40768E-12 | 6.66256E-10 | Cluster 2 |
| ENSG00000136158           | SPRY2        | sprouty RTK signaling antagonist 2                                   | 193.2179689 | -2.073346463 | 0.155775407 | -6.890346064 | 5.56568E-12 | 6.81058E-10 | Cluster 1 |
| ENSG00000204642           | HLA-F        | major histocompatibility complex, class I, F                         | 64.58755191 | 2.937642684  | 0.28216753  | 6.866993827  | 6.55689E-12 | 7.96928E-10 | Cluster 2 |
| ENSG00000225864           | HCG4P11      |                                                                      | 21.15026919 | 3.495153104  | 0.364170584 | 6.851605297  | 7.30258E-12 | 8.81603E-10 | Cluster 2 |
| ENSG00000166886           | NAB2         | NGFI-A binding protein 2 (EGR1 binding protein 2)                    | 133.2573258 | -2.1769804   | 0.172014899 | -6.842316617 | 7.79226E-12 | 9.34448E-10 | Cluster 1 |



|                 |               |                                                                                          |             |              |             |              |             |             |           |
|-----------------|---------------|------------------------------------------------------------------------------------------|-------------|--------------|-------------|--------------|-------------|-------------|-----------|
| ENSG00000117226 | GBP3          | guanylate binding protein 3                                                              | 159.3868754 | 2.302830166  | 0.190804457 | 6.828090845  | 8.60521E-12 | 1.0251E-09  | Cluster 2 |
| ENSG00000043143 | JADE2         | jade family PHD finger 2                                                                 | 259.4342307 | 2.085901547  | 0.160250882 | 6.776259421  | 1.23327E-11 | 1.45948E-09 | Cluster 2 |
| ENSG00000075426 | FOSL2         | FOS-like antigen 2                                                                       | 749.1466481 | -1.704699993 | 0.104546995 | -6.740509327 | 1.57832E-11 | 1.85561E-09 | Cluster 1 |
| ENSG00000168209 | DDIT4         | DNA damage inducible transcript 4                                                        | 357.1116247 | -1.805997134 | 0.120069895 | -6.71273288  | 1.91013E-11 | 2.23113E-09 | Cluster 1 |
| ENSG00000110057 | UNC93B1       | unc-93 homolog B1 (C. elegans)                                                           | 140.832682  | 2.393295804  | 0.207950584 | 6.700129306  | 2.08235E-11 | 2.4166E-09  | Cluster 2 |
| ENSG00000105559 | PLEKHA4       | pleckstrin homology domain containing A4                                                 | 71.82932436 | 2.78996286   | 0.268695559 | 6.661676385  | 2.70722E-11 | 3.12163E-09 | Cluster 2 |
| ENSG00000130513 | GDF15         | growth differentiation factor 15                                                         | 417.6112509 | -1.785363008 | 0.120016397 | -6.543797557 | 5.9976E-11  | 6.87164E-09 | Cluster 1 |
| ENSG00000239713 | APOBEC3G      | apolipoprotein B mRNA editing enzyme, catalytic polypeptide-like 3G                      | 46.97332891 | 3.116005945  | 0.324563075 | 6.519552311  | 7.05175E-11 | 8.02829E-09 | Cluster 2 |
| ENSG00000142961 | MOB3C         | MOB kinase activator 3C                                                                  | 108.2317261 | 2.163138401  | 0.180736359 | 6.435552897  | 1.23025E-10 | 1.3918E-08  | Cluster 2 |
| ENSG00000164342 | TLR3          | toll-like receptor 3                                                                     | 99.52457431 | 3.257950169  | 0.354000546 | 6.378380471  | 1.7897E-10  | 2.01208E-08 | Cluster 2 |
| ENSG00000173530 | TNFRSF10D     | tumor necrosis factor receptor superfamily member 10d, decoy with truncated death domain | 793.7748272 | -1.709330768 | 0.111504369 | -6.361461683 | 1.99843E-10 | 2.23278E-08 | Cluster 1 |
| ENSG00000123609 | NMI           | N-myc and STAT interactor                                                                | 137.4867522 | 2.23944925   | 0.195999513 | 6.323736376  | 2.55313E-10 | 2.83492E-08 | Cluster 2 |
| ENSG00000232133 | IMPDH1P10     |                                                                                          | 200.5752207 | 2.262316798  | 0.201240909 | 6.272664959  | 3.5492E-10  | 3.91675E-08 | Cluster 2 |
| ENSG00000155363 | MOV10         | Mov10 RISC complex RNA helicase                                                          | 385.1859822 | 1.908994382  | 0.145365649 | 6.253158055  | 4.02235E-10 | 4.41183E-08 | Cluster 2 |
| ENSG00000130775 | THEMIS2       | thymocyte selection associated family member 2                                           | 60.86618117 | 2.765536663  | 0.284029658 | 6.216029254  | 5.09893E-10 | 5.55876E-08 | Cluster 2 |
| ENSG00000146859 | TMEM140       | transmembrane protein 140                                                                | 194.14462   | 1.927876896  | 0.151027805 | 6.143748794  | 8.05963E-10 | 8.73353E-08 | Cluster 2 |
| ENSG00000262112 | RP11-670E13.5 |                                                                                          | 133.0556563 | 2.035230368  | 0.169924475 | 6.092297009  | 1.11302E-09 | 1.19886E-07 | Cluster 2 |
| ENSG00000154451 | GBP5          | guanylate binding protein 5                                                              | 21.35526702 | 3.261118148  | 0.371936947 | 6.079305019  | 1.20705E-09 | 1.2924E-07  | Cluster 2 |
| ENSG00000160710 | ADAR          | adenosine deaminase, RNA-specific                                                        | 1726.799075 | 1.720679455  | 0.118872828 | 6.062608815  | 1.33931E-09 | 1.42553E-07 | Cluster 2 |
| ENSG00000174640 | SLCO2A1       | solute carrier organic anion transporter family member 2A1                               | 24.43114885 | 2.9478443    | 0.321840889 | 6.052196491  | 1.42884E-09 | 1.50304E-07 | Cluster 2 |
| ENSG0000006327  | TNFRSF12A     | tumor necrosis factor receptor superfamily member 12A                                    | 306.0748689 | -1.858620591 | 0.141848995 | -6.053060779 | 1.42119E-09 | 1.50304E-07 | Cluster 1 |
| ENSG00000279296 | RP11-609D21.3 |                                                                                          | 137.8440574 | 2.994311669  | 0.330601294 | 6.032377081  | 1.61565E-09 | 1.68967E-07 | Cluster 2 |
| ENSG00000004799 | PDK4          | pyruvate dehydrogenase kinase, isozyme 4                                                 | 119.7633771 | 2.618443962  | 0.275604247 | 5.872347674  | 4.29666E-09 | 4.46754E-07 | Cluster 2 |
| ENSG00000170345 | FOS           | FBJ murine osteosarcoma viral oncogene homolog                                           | 298.5800129 | -1.913961344 | 0.157833688 | -5.790660776 | 7.011E-09   | 7.24793E-07 | Cluster 1 |
| ENSG00000184898 | RBM43         | RNA binding motif protein 43                                                             | 72.04695544 | 2.236710376  | 0.214038764 | 5.777973832  | 7.56056E-09 | 7.7369E-07  | Cluster 2 |
| ENSG00000269926 | RP11-442H21.2 |                                                                                          | 227.8929107 | -1.784829728 | 0.135836251 | -5.77763458  | 7.57001E-09 | 7.7369E-07  | Cluster 1 |
| ENSG00000160888 | IER2          | immediate early response 2                                                               | 807.2127868 | -1.635509854 | 0.110379899 | -5.757478127 | 8.53798E-09 | 8.67691E-07 | Cluster 1 |
| ENSG00000181472 | ZBTB2         | zinc finger and BTB domain containing 2                                                  | 74.86083751 | -2.3339018   | 0.232077215 | -5.747663768 | 9.04849E-09 | 9.14406E-07 | Cluster 1 |
| ENSG00000133321 | RARRES3       | retinoic acid receptor responder (tazarotene induced) 3                                  | 15.1564096  | 3.116926007  | 0.372961346 | 5.675993049  | 1.37886E-08 | 1.38564E-06 | Cluster 2 |
| ENSG00000196776 | CD47          | CD47 molecule                                                                            | 483.8831496 | 1.881455151  | 0.15804606  | 5.57720422   | 2.44415E-08 | 2.44252E-06 | Cluster 2 |
| ENSG00000096696 | DSP           | desmoplakin                                                                              | 70.84729299 | 2.40832778   | 0.252616751 | 5.574958021  | 2.4759E-08  | 2.46058E-06 | Cluster 2 |
| ENSG00000204055 | RP11-247A12.2 |                                                                                          | 36.52073983 | -2.759044148 | 0.317570691 | -5.539063259 | 3.04094E-08 | 3.00552E-06 | Cluster 1 |
| ENSG00000185753 | CXorf38       | chromosome X open reading frame 38                                                       | 206.1011199 | 1.889210764  | 0.162704637 | 5.465183891  | 4.62427E-08 | 4.52073E-06 | Cluster 2 |
| ENSG00000176907 | C8orf4        | chromosome 8 open reading frame 4                                                        | 156.8549613 | -1.896305832 | 0.163990368 | -5.465600461 | 4.61342E-08 | 4.52073E-06 | Cluster 1 |
| ENSG00000004468 | CD38          | CD38 molecule                                                                            | 25.14643705 | 3.033538753  | 0.377933525 | 5.380678395  | 7.42057E-08 | 7.2152E-06  | Cluster 2 |
| ENSG00000125347 | IRF1          | interferon regulatory factor 1                                                           | 344.1413453 | 2.086849386  | 0.202155715 | 5.376298113  | 7.60329E-08 | 7.35311E-06 | Cluster 2 |
| ENSG00000142089 | IFITM3        | interferon induced transmembrane protein 3                                               | 322.4807148 | 1.707755558  | 0.131703032 | 5.373874443  | 7.70625E-08 | 7.41284E-06 | Cluster 2 |

|                 |               |                                                                        |             |              |             |              |             |             |           |
|-----------------|---------------|------------------------------------------------------------------------|-------------|--------------|-------------|--------------|-------------|-------------|-----------|
| ENSG00000169871 | TRIM56        | tripartite motif containing 56                                         | 225.7994339 | 1.747049108  | 0.139598269 | 5.351420985  | 8.72662E-08 | 8.34971E-06 | Cluster 2 |
| ENSG00000238025 | ZDHHC4P1      |                                                                        | 13.81069942 | 2.959312344  | 0.373553658 | 5.245062662  | 1.56229E-07 | 1.48691E-05 | Cluster 2 |
| ENSG00000197461 | PDGFA         | platelet-derived growth factor alpha polypeptide                       | 149.4254818 | -1.969990832 | 0.186231973 | -5.208508607 | 1.90365E-07 | 1.80225E-05 | Cluster 1 |
| ENSG00000102760 | RGCC          | regulator of cell cycle                                                | 102.9683351 | -2.103909012 | 0.213095762 | -5.180342404 | 2.21479E-07 | 2.08584E-05 | Cluster 1 |
| ENSG00000229023 | AC067945.3    |                                                                        | 13.20065734 | 2.894604292  | 0.367400627 | 5.15678024   | 2.51232E-07 | 2.35373E-05 | Cluster 2 |
| ENSG00000132622 | HSPA12B       | heat shock protein family A (Hsp70) member 12B                         | 58.41989996 | 2.212551334  | 0.237574893 | 5.103869849  | 3.32777E-07 | 3.10155E-05 | Cluster 2 |
| ENSG00000167470 | MIDN          | midnolin                                                               | 385.4685528 | -1.60563972  | 0.119204861 | -5.080662944 | 3.7612E-07  | 3.48745E-05 | Cluster 1 |
| ENSG00000117318 | ID3           | inhibitor of DNA binding 3, dominant negative helix-loop-helix protein | 1170.831974 | -1.486827872 | 0.096493358 | -5.045195681 | 4.53057E-07 | 4.17928E-05 | Cluster 1 |
| ENSG00000038210 | PI4K2B        | phosphatidylinositol 4-kinase type 2 beta                              | 320.3848889 | 1.926270409  | 0.183813835 | 5.039176769  | 4.67539E-07 | 4.29086E-05 | Cluster 2 |
| ENSG00000156030 | ELMSAN1       | ELM2 and Myb/SANT-like domain containing 1                             | 568.4852642 | -1.518208703 | 0.104598396 | -4.954270058 | 7.26023E-07 | 6.62929E-05 | Cluster 1 |
| ENSG00000269720 | CTD-2521M24.5 |                                                                        | 9.880737249 | 2.864346063  | 0.376869699 | 4.946924813  | 7.53951E-07 | 6.84953E-05 | Cluster 2 |
| ENSG00000141682 | PMAIP1        | phorbol-12-myristate-13-acetate-induced protein 1                      | 259.8845716 | 2.378373915  | 0.281232327 | 4.90119301   | 9.52564E-07 | 8.61041E-05 | Cluster 2 |
| ENSG00000108551 | RASD1         | RAS, dexamethasone-induced 1                                           | 38.8493548  | -2.406251149 | 0.287281475 | -4.895028989 | 9.82912E-07 | 8.84031E-05 | Cluster 1 |
| ENSG00000198576 | ARC           | activity-regulated cytoskeleton-associated protein                     | 14.35283969 | -2.799153639 | 0.36940893  | -4.870357733 | 1.11396E-06 | 9.96915E-05 | Cluster 1 |
| ENSG00000213689 | TREX1         | three prime repair exonuclease 1                                       | 79.64528288 | 2.077449735  | 0.221970285 | 4.854026896  | 1.20979E-06 | 0.000107731 | Cluster 2 |
| ENSG00000141526 | SLC16A3       | solute carrier family 16 (monocarboxylate transporter), member 3       | 502.6031999 | -1.67553501  | 0.139560771 | -4.840436233 | 1.29554E-06 | 0.000114799 | Cluster 1 |
| ENSG00000163565 | IFI16         | interferon, gamma-inducible protein 16                                 | 951.145506  | 1.662650633  | 0.138045858 | 4.800221045  | 1.58491E-06 | 0.000139751 | Cluster 2 |
| ENSG00000034152 | MAP2K3        | mitogen-activated protein kinase kinase 3                              | 122.3304251 | -1.90606076  | 0.188861502 | -4.797487845 | 1.60668E-06 | 0.00014098  | Cluster 1 |
| ENSG00000137842 | TMEM62        | transmembrane protein 62                                               | 140.7285858 | 1.827830443  | 0.173645514 | 4.767358647  | 1.86657E-06 | 0.000162989 | Cluster 2 |
| ENSG00000224574 | COL18A1-AS2   | COL18A1 antisense RNA 2                                                | 85.35670516 | -1.966843531 | 0.204213795 | -4.73446728  | 2.19631E-06 | 0.000190856 | Cluster 1 |
| ENSG00000070610 | GBA2          | glucosidase, beta (bile acid) 2                                        | 649.310775  | -1.447513793 | 0.095227201 | -4.699432389 | 2.60886E-06 | 0.000225616 | Cluster 1 |
| ENSG00000204138 | PHACTR4       | phosphatase and actin regulator 4                                      | 301.5269014 | 1.628098647  | 0.134694441 | 4.663137111  | 3.11425E-06 | 0.000268034 | Cluster 2 |
| ENSG00000171617 | ENC1          | ectodermal-neural cortex 1 (with BTB domain)                           | 660.5194556 | -1.409885354 | 0.088183935 | -4.648072838 | 3.35051E-06 | 0.000286995 | Cluster 1 |
| ENSG00000166889 | PATL1         | protein associated with topoisomerase II homolog 1 (yeast)             | 197.408343  | 1.743939779  | 0.160216554 | 4.643339022  | 3.42823E-06 | 0.000292261 | Cluster 2 |
| ENSG00000224611 | AC007919.18   |                                                                        | 10.17385468 | 2.727620163  | 0.375855402 | 4.596502145  | 4.29643E-06 | 0.000364548 | Cluster 2 |
| ENSG00000168453 | HR            | hair growth associated                                                 | 18.26651729 | -2.655022711 | 0.361195649 | -4.58206713  | 4.60402E-06 | 0.000387101 | Cluster 1 |
| ENSG00000185722 | ANKFY1        | ankyrin repeat and FYVE domain containing 1                            | 383.6505267 | 1.59951289   | 0.130840578 | 4.582010411  | 4.60527E-06 | 0.000387101 | Cluster 2 |
| ENSG00000225492 | GBP1P1        | guanylate binding protein 1, interferon-inducible pseudogene 1         | 10.48246095 | 2.711443258  | 0.376033534 | 4.551304879  | 5.33142E-06 | 0.000446054 | Cluster 2 |
| ENSG00000196116 | TDRD7         | tudor domain containing 7                                              | 175.0094745 | 1.860177277  | 0.19178684  | 4.485069346  | 7.28902E-06 | 0.000607014 | Cluster 2 |
| ENSG00000204592 | HLA-E         | major histocompatibility complex, class I, E                           | 2824.041113 | 1.493181529  | 0.110017644 | 4.482749425  | 7.36874E-06 | 0.000610825 | Cluster 2 |
| ENSG00000277402 | MIR6891       | microRNA 6891                                                          | 15.84701502 | 2.592491136  | 0.356223023 | 4.470489085  | 7.80409E-06 | 0.000643945 | Cluster 2 |
| ENSG00000165949 | IFI27         | interferon, alpha-inducible protein 27                                 | 519.7449245 | 2.359567614  | 0.304476378 | 4.46526467   | 7.99698E-06 | 0.000656848 | Cluster 2 |
| ENSG00000213928 | IRF9          | interferon regulatory factor 9                                         | 148.5322803 | 1.90234381   | 0.202567186 | 4.454540878  | 8.40729E-06 | 0.000687411 | Cluster 2 |
| ENSG00000135148 | TRAFD1        | TRAF-type zinc finger domain containing 1                              | 296.9174084 | 1.905142845  | 0.203375896 | 4.450590571  | 8.56345E-06 | 0.00069701  | Cluster 2 |
| ENSG00000255112 | CHMP1B        | charged multivesicular body protein 1B                                 | 407.872288  | -1.52627867  | 0.1185203   | -4.440409522 | 8.97878E-06 | 0.000727524 | Cluster 1 |
| ENSG00000184307 | ZDHHC23       | zinc finger, DHHC-type containing 23                                   | 57.27885591 | -2.142479819 | 0.258528306 | -4.419167242 | 9.9082E-06  | 0.000799231 | Cluster 1 |
| ENSG00000106089 | STX1A         | syntaxin 1A                                                            | 118.839296  | -1.782298733 | 0.177581019 | -4.405306025 | 1.05635E-05 | 0.000848284 | Cluster 1 |
| ENSG00000138670 | RASGEF1B      | RasGEF domain family member 1B                                         | 47.05669694 | 2.443241728  | 0.328171136 | 4.39783262   | 1.09337E-05 | 0.000874115 | Cluster 2 |

|                                       |                                                                           |             |              |             |              |             |             |           |
|---------------------------------------|---------------------------------------------------------------------------|-------------|--------------|-------------|--------------|-------------|-------------|-----------|
| XXbac-<br>ENSG00000244255 BPG116M5.17 |                                                                           | 22.67599839 | 2.491805601  | 0.339798074 | 4.390270916  | 1.1321E-05  | 0.000901068 | Cluster 2 |
| ENSG00000216490 IFI30                 | interferon, gamma-inducible protein 30                                    | 19.5700805  | 2.651307616  | 0.377798825 | 4.370864875  | 1.23755E-05 | 0.000980666 | Cluster 2 |
| ENSG00000137752 CASP1                 | caspase 1                                                                 | 44.39741738 | 2.23210802   | 0.287243124 | 4.289425637  | 1.79136E-05 | 0.001413287 | Cluster 2 |
| ENSG00000179348 GATA2                 | GATA binding protein 2                                                    | 240.8853556 | -1.55939196  | 0.130763693 | -4.277884386 | 1.88678E-05 | 0.00148207  | Cluster 1 |
| ENSG00000102921 N4BP1                 | NEDD4 binding protein 1                                                   | 195.0511851 | 1.795129828  | 0.187368939 | 4.243658695  | 2.19905E-05 | 0.001719846 | Cluster 2 |
| ENSG00000131196 NFATC1                | nuclear factor of activated T-cells, cytoplasmic, calcineurin-dependent 1 | 116.6279011 | -1.855494587 | 0.201909154 | -4.237027241 | 2.26499E-05 | 0.001763748 | Cluster 1 |
| ENSG00000185404 SP140L                | SP140 nuclear body protein like                                           | 111.6466051 | 1.744889792  | 0.177419949 | 4.198455672  | 2.68741E-05 | 0.002081355 | Cluster 2 |
| ENSG00000169228 RAB24                 | RAB24, member RAS oncogene family                                         | 77.75896615 | 1.837994948  | 0.199630333 | 4.197733559  | 2.696E-05   | 0.002081355 | Cluster 2 |
| ENSG00000259529 RP11-468E2.4          |                                                                           | 291.3178963 | 1.527991015  | 0.126985755 | 4.157875927  | 3.2122E-05  | 0.002469279 | Cluster 2 |
| ENSG00000261884 CTC-479C5.12          |                                                                           | 135.8474075 | 1.935131284  | 0.225599611 | 4.145092626  | 3.39676E-05 | 0.002600042 | Cluster 2 |
| ENSG00000137200 CMTR1                 | cap methyltransferase 1                                                   | 332.8999316 | 1.54883268   | 0.132586394 | 4.139434391  | 3.48163E-05 | 0.002653711 | Cluster 2 |
| RP11-<br>ENSG00000225075 426L16.3     |                                                                           | 41.56134499 | 2.08772979   | 0.264943784 | 4.105511643  | 4.03421E-05 | 0.003061914 | Cluster 2 |
| ENSG00000172201 ID4                   | inhibitor of DNA binding 4, dominant negative helix-loop-helix protein    | 8.228193539 | -2.513013215 | 0.371253567 | -4.075417312 | 4.59319E-05 | 0.003471525 | Cluster 1 |
| RP11-<br>ENSG00000281028 717K11.2     | phosphatidylinositol 4-kinase type 2 beta                                 | 171.3090741 | 1.815512681  | 0.200668298 | 4.063983643  | 4.82422E-05 | 0.003630882 | Cluster 2 |
| ENSG00000277511 CTD-2095E4.5          |                                                                           | 9.434067971 | 2.506227919  | 0.375183036 | 4.014648252  | 5.95345E-05 | 0.004462112 | Cluster 2 |
| ENSG00000128394 APOBEC3F              | apolipoprotein B mRNA editing enzyme, catalytic polypeptide-like 3F       | 27.35345852 | 2.203804008  | 0.300469159 | 4.006414541  | 6.16474E-05 | 0.004601302 | Cluster 2 |
| ENSG00000136147 PHF11                 | PHD finger protein 11                                                     | 103.3452573 | 1.693003442  | 0.173572657 | 3.992584168  | 6.53571E-05 | 0.004858033 | Cluster 2 |
| ENSG00000114127 XRN1                  | 5'-3' exoribonuclease 1                                                   | 783.9417977 | 2.009771946  | 0.253186052 | 3.988260561  | 6.65595E-05 | 0.004927049 | Cluster 2 |
| ENSG00000241158 ADAMTS9-AS1           | ADAMTS9 antisense RNA 1                                                   | 130.1364007 | 1.693551855  | 0.176110248 | 3.938168635  | 8.21059E-05 | 0.006052953 | Cluster 2 |
| ENSG00000183535 COL18A1-AS1           | COL18A1 antisense RNA 1                                                   | 142.1293702 | -1.606054299 | 0.154355986 | -3.92634141  | 8.62477E-05 | 0.006332342 | Cluster 1 |
| ENSG00000136603 SKIL                  | SKI-like proto-oncogene                                                   | 1262.333198 | -1.378885211 | 0.09669446  | -3.918375593 | 8.91477E-05 | 0.006518655 | Cluster 1 |
| ENSG00000122863 CHST3                 | carbohydrate (chondroitin 6) sulfotransferase 3                           | 95.92899446 | -1.744452937 | 0.190572473 | -3.906403302 | 9.36801E-05 | 0.006822339 | Cluster 1 |
| ENSG00000145632 PLK2                  | polo-like kinase 2                                                        | 1715.598191 | 1.300402446  | 0.077548376 | 3.873742583  | 0.000107177 | 0.007766964 | Cluster 2 |
| ENSG00000146592 CREB5                 | cAMP responsive element binding protein 5                                 | 71.04256981 | -1.839298206 | 0.21670631  | -3.8729754   | 0.000107515 | 0.007766964 | Cluster 1 |
| ENSG00000165806 CASP7                 | caspase 7                                                                 | 409.4992691 | 1.455273399  | 0.119142525 | 3.821250214  | 0.000132777 | 0.00955356  | Cluster 2 |
| ENSG00000221869 CEBPD                 | CCAAT/enhancer binding protein (C/EBP), delta                             | 22.11461266 | 2.267965791  | 0.333211158 | 3.805292111  | 0.000141637 | 0.010150459 | Cluster 2 |
| ENSG00000171223 JUNB                  | jun B proto-oncogene                                                      | 671.0948894 | -1.602648061 | 0.158802681 | -3.794948919 | 0.000147674 | 0.010541101 | Cluster 1 |
| ENSG00000081479 LRP2                  | LDL receptor related protein 2                                            | 6.154561465 | 2.401045418  | 0.370805323 | 3.778385402  | 0.000157848 | 0.011222838 | Cluster 2 |
| ENSG00000128594 LRRC4                 | leucine rich repeat containing 4                                          | 49.72652253 | -1.929478257 | 0.248145623 | -3.745696766 | 0.000179894 | 0.012739879 | Cluster 1 |
| ENSG00000177706 FAM20C                | family with sequence similarity 20 member C                               | 75.25268866 | -1.826271571 | 0.222816701 | -3.708301785 | 0.000208654 | 0.014684235 | Cluster 1 |
| ENSG00000267598 CTC-250I14.6          |                                                                           | 516.6607016 | -1.477934068 | 0.128896017 | -3.707904093 | 0.000208982 | 0.014684235 | Cluster 1 |
| ENSG00000112343 TRIM38                | tripartite motif containing 38                                            | 296.9064196 | 1.626223824  | 0.169237026 | 3.700276707  | 0.000215365 | 0.01507384  | Cluster 2 |
| ENSG00000279637 RP11-196B3.1          |                                                                           | 12.99036294 | -2.349794421 | 0.36801246  | -3.66779544  | 0.000244651 | 0.01705728  | Cluster 1 |
| ENSG00000154553 PDLIM3                | PDZ and LIM domain 3                                                      | 77.5322563  | -1.79033061  | 0.216336568 | -3.653245574 | 0.000258946 | 0.017984275 | Cluster 1 |
| ENSG00000205220 PSMB10                | proteasome subunit beta 10                                                | 140.6755247 | 1.817094037  | 0.224477253 | 3.639985899  | 0.000272653 | 0.018863391 | Cluster 2 |
| ENSG00000243649 CFB                   | complement factor B                                                       | 23.99095462 | 2.199562421  | 0.329773064 | 3.637539118  | 0.000275255 | 0.018970475 | Cluster 2 |
| ENSG00000124226 RNF114                | ring finger protein 114                                                   | 340.9491206 | 1.65274108   | 0.179705438 | 3.632283408  | 0.000280924 | 0.019287279 | Cluster 2 |

|                 |              |                                                           |             |              |             |              |             |             |           |
|-----------------|--------------|-----------------------------------------------------------|-------------|--------------|-------------|--------------|-------------|-------------|-----------|
| ENSG00000120217 | CD274        | CD274 molecule                                            | 108.8300084 | 1.800637657  | 0.221550571 | 3.613791885  | 0.000301751 | 0.020638412 | Cluster 2 |
| ENSG00000258521 | RP11-638I2.9 |                                                           | 12.81555778 | 2.302790038  | 0.36188481  | 3.600013046  | 0.000318201 | 0.021681074 | Cluster 2 |
| ENSG0000006459  | KDM7A        | lysine (K)-specific demethylase 7A                        | 181.0438746 | -1.508410619 | 0.142455157 | -3.568916906 | 0.00035846  | 0.024332    | Cluster 1 |
| ENSG00000136999 | NOV          | nephroblastoma overexpressed                              | 19.22890231 | 2.222875861  | 0.345327288 | 3.541208308  | 0.000398299 | 0.026934595 | Cluster 2 |
| ENSG00000163638 | ADAMTS9      | ADAM metalloproteinase with thrombospondin type 1 motif 9 | 1152.3517   | 1.304282776  | 0.085964512 | 3.539632442  | 0.000400685 | 0.026994441 | Cluster 2 |
| ENSG00000245556 | SCAMP1-AS1   | SCAMP1 antisense RNA 1                                    | 26.68305563 | 2.079668418  | 0.306387475 | 3.523866034  | 0.000425299 | 0.02854583  | Cluster 2 |
| ENSG00000185880 | TRIM69       | tripartite motif containing 69                            | 72.21305148 | 1.82105253   | 0.233785058 | 3.511997457  | 0.000444752 | 0.029740534 | Cluster 2 |
| ENSG00000238160 | AC116366.5   |                                                           | 13.04409285 | 2.276493166  | 0.366514587 | 3.482789531  | 0.000496218 | 0.033059167 | Cluster 2 |
| ENSG00000122861 | PLAU         | plasminogen activator, urokinase                          | 65.68900465 | -1.828184906 | 0.238896403 | -3.466711497 | 0.000526867 | 0.03497153  | Cluster 1 |
| ENSG00000164136 | IL15         | interleukin 15                                            | 38.65632421 | 2.028156849  | 0.298145405 | 3.448508111  | 0.000563693 | 0.037278314 | Cluster 2 |
| ENSG00000104973 | MED25        | mediator complex subunit 25                               | 129.8214577 | 1.583864665  | 0.169724391 | 3.440075184  | 0.000581553 | 0.038318565 | Cluster 2 |
| ENSG0000003402  | CFLAR        | CASP8 and FADD like apoptosis regulator                   | 1980.295877 | 1.402639223  | 0.117094692 | 3.438577912  | 0.000584778 | 0.038390478 | Cluster 2 |
| ENSG00000134470 | IL15RA       | interleukin 15 receptor subunit alpha                     | 171.4786886 | 1.765708653  | 0.222899233 | 3.435223367  | 0.000592066 | 0.038727549 | Cluster 2 |
| ENSG00000163131 | CTSS         | cathepsin S                                               | 76.58654692 | 2.031805291  | 0.300895852 | 3.429111049  | 0.000605562 | 0.039466826 | Cluster 2 |
| ENSG00000227051 | C14orf132    |                                                           | 90.7468605  | -1.682512186 | 0.199891161 | -3.41441905  | 0.000639182 | 0.041507592 | Cluster 1 |
| ENSG00000137727 | ARHGAP20     | Rho GTPase activating protein 20                          | 40.08260048 | 1.987609542  | 0.290723905 | 3.397070291  | 0.000681115 | 0.04407155  | Cluster 2 |
| ENSG00000133561 | GIMAP6       | GTPase, IMAP family member 6                              | 1029.326971 | 1.282124764  | 0.083136806 | 3.393500131  | 0.000690055 | 0.044490014 | Cluster 2 |

HUVEC – 16 hpi vs. uninfected

| Gene_id         | Name          | Description                                                  | baseMean    | log2FoldChange | lfcSE       | stat        | pvalue      | padj        | Cluster   |
|-----------------|---------------|--------------------------------------------------------------|-------------|----------------|-------------|-------------|-------------|-------------|-----------|
| ENSG00000119917 | IFIT3         | interferon induced protein with tetratricopeptide repeats 3  | 1394.543353 | 6.547000913    | 0.274705778 | 20.19251633 | 1.13912E-90 | 3.18488E-86 | Cluster 2 |
| ENSG00000101347 | SAMHD1        | SAM domain and HD domain 1                                   | 537.7034743 | 3.805562608    | 0.145654246 | 19.26179759 | 1.12408E-82 | 1.5714E-78  | Cluster 2 |
| ENSG00000152778 | IFIT5         | interferon induced protein with tetratricopeptide repeats 5  | 391.3525165 | 3.846847186    | 0.148385404 | 19.18549336 | 4.89275E-82 | 4.55988E-78 | Cluster 2 |
| ENSG00000140853 | NLRC5         | NLR family, CARD domain containing 5                         | 419.1782563 | 4.497988251    | 0.189841559 | 18.42582981 | 8.15308E-76 | 5.6988E-72  | Cluster 2 |
| ENSG00000128284 | APOL3         | apolipoprotein L, 3                                          | 452.955401  | 3.863911731    | 0.15553426  | 18.41338186 | 1.0261E-75  | 5.7377E-72  | Cluster 2 |
| ENSG00000263069 | CTD-2047H16.4 | uncharacterized LOC100294362                                 | 415.8456059 | 4.14520039     | 0.175477328 | 17.92368518 | 7.70507E-72 | 3.59043E-68 | Cluster 2 |
| ENSG00000257452 | RP1-71H24.1   |                                                              | 107.7353748 | 5.688673153    | 0.268083258 | 17.4896157  | 1.71913E-68 | 6.86643E-65 | Cluster 2 |
| ENSG00000130589 | HELZ2         | helicase with zinc finger 2, transcriptional coactivator     | 2035.697532 | 4.633212571    | 0.215350362 | 16.87117002 | 7.33294E-64 | 2.5627E-60  | Cluster 2 |
| ENSG00000184979 | USP18         | ubiquitin specific peptidase 18                              | 334.7952188 | 3.693348333    | 0.161690255 | 16.65745615 | 2.67148E-62 | 8.29909E-59 | Cluster 2 |
| ENSG00000185885 | IFITM1        | interferon induced transmembrane protein 1                   | 181.8742945 | 5.02572448     | 0.246471733 | 16.33341247 | 5.70993E-60 | 1.59644E-56 | Cluster 2 |
| ENSG00000134326 | CMPK2         | cytidine monophosphate (UMP-CMP) kinase 2, mitochondrial     | 531.4512502 | 5.595023796    | 0.28495207  | 16.12560245 | 1.68607E-58 | 4.28553E-55 | Cluster 2 |
| ENSG00000178685 | PARP10        | poly(ADP-ribose) polymerase family member 10                 | 437.1153032 | 3.11018954     | 0.132479342 | 15.92844218 | 4.02254E-57 | 9.37219E-54 | Cluster 2 |
| ENSG00000128335 | APOL2         | apolipoprotein L, 2                                          | 631.6611184 | 3.418414879    | 0.152661317 | 15.84170061 | 1.60423E-56 | 3.4502E-53  | Cluster 2 |
| ENSG00000138496 | PARP9         | poly(ADP-ribose) polymerase family member 9                  | 512.8227769 | 3.510568439    | 0.161778248 | 15.51857851 | 2.59741E-54 | 5.1872E-51  | Cluster 2 |
| ENSG00000135899 | SP110         | SP110 nuclear body protein                                   | 217.9349397 | 4.159140993    | 0.20365662  | 15.51209579 | 2.87345E-54 | 5.35591E-51 | Cluster 2 |
| ENSG00000185507 | IRF7          | interferon regulatory factor 7                               | 208.6698546 | 3.603189392    | 0.170102247 | 15.30367434 | 7.22593E-53 | 1.26269E-49 | Cluster 2 |
| ENSG00000173821 | RNF213        | ring finger protein 213                                      | 6329.405111 | 3.974630234    | 0.196259848 | 15.15659094 | 6.85355E-52 | 1.12717E-48 | Cluster 2 |
| ENSG00000170581 | STAT2         | signal transducer and activator of transcription 2           | 901.7025303 | 3.332548535    | 0.154467719 | 15.10055659 | 1.60572E-51 | 2.49413E-48 | Cluster 2 |
| ENSG00000156587 | UBE2L6        | ubiquitin conjugating enzyme E2L 6                           | 248.47387   | 3.357910277    | 0.156406022 | 15.07557216 | 2.34476E-51 | 3.45037E-48 | Cluster 2 |
| ENSG00000068079 | IFI35         | interferon induced protein 35                                | 274.7578354 | 4.251304185    | 0.219961437 | 14.78124635 | 1.93551E-49 | 2.70575E-46 | Cluster 2 |
| ENSG00000280248 | CTD-2047H16.3 |                                                              | 224.3860078 | 3.932915806    | 0.200884989 | 14.59997496 | 2.80949E-48 | 3.7405E-45  | Cluster 2 |
| ENSG00000130303 | BST2          | bone marrow stromal cell antigen 2                           | 397.1495681 | 3.384344717    | 0.165384086 | 14.41701418 | 4.04465E-47 | 5.1402E-44  | Cluster 2 |
| ENSG00000060491 | OGFR          | opioid growth factor receptor                                | 426.9608299 | 2.458859338    | 0.101678971 | 14.34769965 | 1.1013E-46  | 1.33875E-43 | Cluster 2 |
| ENSG00000168961 | LGALS9        | lectin, galactoside-binding, soluble, 9                      | 261.3994593 | 3.215966722    | 0.154582941 | 14.33513104 | 1.31997E-46 | 1.53771E-43 | Cluster 2 |
| ENSG00000089127 | OAS1          | 2'-5'-oligoadenylate synthetase 1                            | 432.480613  | 5.153729432    | 0.293495799 | 14.1526027  | 1.79971E-45 | 2.01272E-42 | Cluster 2 |
| ENSG00000119922 | IFIT2         | interferon induced protein with tetratricopeptide repeats 2  | 920.0274502 | 5.691911595    | 0.333732119 | 14.05891531 | 6.79192E-45 | 7.30367E-42 | Cluster 2 |
| ENSG00000168062 | BATF2         | basic leucine zipper transcription factor, ATF-like 2        | 83.01637811 | 5.329334951    | 0.308320849 | 14.04165486 | 8.6665E-45  | 8.97432E-42 | Cluster 2 |
| ENSG00000225886 | RP11-288L9.4  |                                                              | 62.80870824 | 5.418559483    | 0.317039936 | 13.93691766 | 3.77912E-44 | 3.77359E-41 | Cluster 2 |
| ENSG00000172183 | ISG20         | interferon stimulated exonuclease gene 20kDa                 | 181.6549416 | 4.302988988    | 0.237647987 | 13.89866173 | 6.45368E-44 | 6.22201E-41 | Cluster 2 |
| ENSG00000115267 | IFIH1         | interferon induced, with helicase C domain 1                 | 628.4811053 | 4.941261144    | 0.28488189  | 13.83471988 | 1.57348E-43 | 1.46643E-40 | Cluster 2 |
| ENSG00000130813 | C19orf66      | chromosome 19 open reading frame 66                          | 348.5192544 | 3.246239388    | 0.163204076 | 13.763378   | 4.23278E-43 | 3.81756E-40 | Cluster 2 |
| ENSG00000168016 | TRANK1        | tetratricopeptide repeat and ankyrin repeat containing 1     | 293.1633185 | 3.644369508    | 0.193700015 | 13.65188075 | 1.96735E-42 | 1.71891E-39 | Cluster 2 |
| ENSG00000276863 | CTD-2047H16.5 |                                                              | 147.6465321 | 3.825457551    | 0.20755891  | 13.61279819 | 3.36124E-42 | 2.84778E-39 | Cluster 2 |
| ENSG00000121060 | TRIM25        | tripartite motif containing 25                               | 866.691858  | 2.359066056    | 0.101099913 | 13.44280148 | 3.39342E-41 | 2.79049E-38 | Cluster 2 |
| ENSG00000183486 | MX2           | MX dynamin-like GTPase 2                                     | 356.0366428 | 5.743940577    | 0.353777182 | 13.40940234 | 5.32663E-41 | 4.25507E-38 | Cluster 2 |
| ENSG00000221963 | APOL6         | apolipoprotein L, 6                                          | 631.5877576 | 5.116780787    | 0.307755964 | 13.37677012 | 8.26621E-41 | 6.41986E-38 | Cluster 2 |
| ENSG00000138646 | HERC5         | HECT and RLD domain containing E3 ubiquitin protein ligase 5 | 376.7845114 | 5.142285533    | 0.310907846 | 13.32319396 | 1.6969E-40  | 1.28226E-37 | Cluster 2 |
| ENSG00000132109 | TRIM21        | tripartite motif containing 21                               | 164.9208847 | 3.202489663    | 0.166134096 | 13.25730069 | 4.09367E-40 | 3.01197E-37 | Cluster 2 |
| ENSG00000280755 | AC009950.1    | SP110 nuclear body protein                                   | 150.438364  | 3.906800652    | 0.222068711 | 13.08964526 | 3.77366E-39 | 2.70533E-36 | Cluster 2 |

|                 |                   |                                                                            |             |             |             |             |             |             |           |
|-----------------|-------------------|----------------------------------------------------------------------------|-------------|-------------|-------------|-------------|-------------|-------------|-----------|
| ENSG00000187608 | ISG15             | ISG15 ubiquitin-like modifier                                              | 1434.920784 | 4.239611276 | 0.252296967 | 12.84046857 | 9.72839E-38 | 6.7999E-35  | Cluster 2 |
| ENSG00000111331 | OAS3              | 2'-5'-oligoadenylate synthetase 3                                          | 940.0457269 | 4.500241229 | 0.273193491 | 12.8123156  | 1.39897E-37 | 9.53992E-35 | Cluster 2 |
| ENSG00000115415 | STAT1             | signal transducer and activator of transcription 1                         | 2768.269437 | 2.797654524 | 0.142791539 | 12.58936304 | 2.41615E-36 | 1.60841E-33 | Cluster 2 |
| ENSG00000205413 | SAMD9             | sterile alpha motif domain containing 9                                    | 657.1221937 | 4.103889808 | 0.247570321 | 12.53740671 | 4.65997E-36 | 3.02995E-33 | Cluster 2 |
| ENSG00000138642 | HERC6             | HECT and RLD domain containing E3 ubiquitin protein ligase family member 6 | 457.1481929 | 4.255635496 | 0.262708007 | 12.39260097 | 2.86595E-35 | 1.82111E-32 | Cluster 2 |
| ENSG00000107201 | DDX58             | DEAD (Asp-Glu-Ala-Asp) box polypeptide 58                                  | 1210.566667 | 4.281727968 | 0.270794947 | 12.1188671  | 8.3911E-34  | 5.21348E-31 | Cluster 2 |
| ENSG00000100342 | APOL1             | apolipoprotein L1                                                          | 222.1961015 | 3.548827878 | 0.212710772 | 11.98259899 | 4.38362E-33 | 2.66438E-30 | Cluster 2 |
| ENSG00000124201 | ZNF1              | zinc finger, NFX1-type containing 1                                        | 962.249264  | 2.774497611 | 0.148787927 | 11.9263548  | 8.6269E-33  | 5.13191E-30 | Cluster 2 |
| ENSG00000188313 | PLSCR1            | phospholipid scramblase 1                                                  | 465.2297432 | 2.672721646 | 0.140451643 | 11.9095912  | 1.05493E-32 | 6.14476E-30 | Cluster 2 |
| ENSG00000181381 | DDX60L            | DEAD (Asp-Glu-Ala-Asp) box polypeptide 60-like                             | 1813.790747 | 3.44499055  | 0.207762503 | 11.76819933 | 5.69266E-32 | 3.24819E-29 | Cluster 2 |
| ENSG00000112773 | FAM46A            | family with sequence similarity 46 member A                                | 73.06726952 | 3.84592778  | 0.242547847 | 11.73346956 | 8.58654E-32 | 4.80142E-29 | Cluster 2 |
| ENSG00000101342 | TLDC2             | TBC/LysM-associated domain containing 2                                    | 65.56340199 | 3.693790368 | 0.23033387  | 11.69515524 | 1.3494E-31  | 7.39763E-29 | Cluster 2 |
| ENSG00000267387 | CTD-2240E14.4     |                                                                            | 124.3228533 | 3.280067605 | 0.195420719 | 11.66748138 | 1.86874E-31 | 1.00477E-28 | Cluster 2 |
| ENSG00000182179 | UBA7              | ubiquitin-like modifier activating enzyme 7                                | 287.0727325 | 2.753797456 | 0.151006929 | 11.61401977 | 3.49777E-31 | 1.84517E-28 | Cluster 2 |
| ENSG00000173193 | PARP14            | poly(ADP-ribose) polymerase family member 14                               | 3230.511171 | 3.61203406  | 0.228295354 | 11.44146831 | 2.59457E-30 | 1.34336E-27 | Cluster 2 |
| ENSG00000185745 | IFIT1             | interferon induced protein with tetratricopeptide repeats 1                | 1399.14554  | 5.150021688 | 0.368238448 | 11.26993043 | 1.84716E-29 | 9.38994E-27 | Cluster 2 |
| ENSG00000240065 | PSMB9             | proteasome subunit beta 9                                                  | 68.55825235 | 4.026705804 | 0.268672979 | 11.26538968 | 1.9449E-29  | 9.71024E-27 | Cluster 2 |
| ENSG00000204261 | PSMB8-AS1         | PSMB8 antisense RNA 1 (head to head)                                       | 156.4121888 | 3.663347729 | 0.240998061 | 11.05132431 | 2.16005E-28 | 1.05952E-25 | Cluster 2 |
| ENSG00000131979 | GCH1              | GTP cyclohydrolase 1                                                       | 143.3497883 | 3.780674806 | 0.251721238 | 11.0466436  | 2.27565E-28 | 1.09698E-25 | Cluster 2 |
| ENSG00000225963 | AC009950.2        |                                                                            | 45.38416995 | 4.103208185 | 0.282722613 | 10.9761584  | 4.97639E-28 | 2.35822E-25 | Cluster 2 |
| ENSG00000111335 | OAS2              | 2'-5'-oligoadenylate synthetase 2                                          | 764.0131342 | 4.803160748 | 0.347937375 | 10.93058986 | 8.23116E-28 | 3.83558E-25 | Cluster 2 |
| ENSG00000002549 | LAP3              | leucine aminopeptidase 3                                                   | 1368.79701  | 2.222782495 | 0.113816399 | 10.74346495 | 6.36112E-27 | 2.91558E-24 | Cluster 2 |
| ENSG00000132530 | XAF1              | XIAP associated factor 1                                                   | 332.0599535 | 3.851816844 | 0.266613917 | 10.69642902 | 1.05776E-26 | 4.77E-24    | Cluster 2 |
| ENSG00000134321 | RSAD2             | radical S-adenosyl methionine domain containing 2                          | 1354.259541 | 4.914605814 | 0.37499497  | 10.43908886 | 1.64381E-25 | 7.29512E-23 | Cluster 2 |
| ENSG00000108771 | DHX58             | DEXH (Asp-Glu-X-His) box polypeptide 58                                    | 123.4589312 | 3.559110577 | 0.245701859 | 10.41551168 | 2.10662E-25 | 9.20295E-23 | Cluster 2 |
| ENSG00000168394 | TAP1              | transporter 1, ATP-binding cassette, sub-family B (MDR/TAP)                | 688.4815401 | 3.854651403 | 0.275386536 | 10.36598028 | 3.54109E-25 | 1.52316E-22 | Cluster 2 |
| ENSG00000157601 | MX1               | MX dynamin-like GTPase 1                                                   | 3295.228182 | 4.617466262 | 0.351430371 | 10.29355048 | 7.53458E-25 | 3.19181E-22 | Cluster 2 |
| ENSG00000136514 | RTP4              | receptor (chemosensory) transporter protein 4                              | 29.15871251 | 4.539720648 | 0.347368534 | 10.19010157 | 2.19535E-24 | 9.12567E-22 | Cluster 2 |
| ENSG00000160932 | LY6E              | lymphocyte antigen 6 complex, locus E                                      | 332.6783787 | 2.46125838  | 0.143414747 | 10.18903852 | 2.21948E-24 | 9.12567E-22 | Cluster 2 |
| ENSG00000204267 | TAP2              | transporter 2, ATP-binding cassette, sub-family B (MDR/TAP)                | 390.8166902 | 2.627344425 | 0.162021487 | 10.04400374 | 9.76292E-24 | 3.95596E-21 | Cluster 2 |
| ENSG00000177409 | SAMD9L            | sterile alpha motif domain containing 9-like                               | 805.651111  | 3.524771047 | 0.251960749 | 10.02049351 | 1.23883E-23 | 4.94806E-21 | Cluster 2 |
| ENSG00000135114 | OASL              | 2'-5'-oligoadenylate synthetase-like                                       | 1123.835101 | 4.764715451 | 0.377750594 | 9.966140388 | 2.14399E-23 | 8.44279E-21 | Cluster 2 |
| ENSG00000163644 | PPM1K             | protein phosphatase, Mg2+/Mn2+ dependent 1K                                | 290.6755824 | 2.725650579 | 0.17319151  | 9.963828931 | 2.19445E-23 | 8.52146E-21 | Cluster 2 |
| ENSG00000228318 | AP001610.5        |                                                                            | 733.0868016 | 4.497639209 | 0.352703525 | 9.916655095 | 3.52367E-23 | 1.34957E-20 | Cluster 2 |
| ENSG00000067066 | SP100             | SP100 nuclear antigen                                                      | 803.3625513 | 2.137421965 | 0.115495565 | 9.848187339 | 6.97913E-23 | 2.63688E-20 | Cluster 2 |
| ENSG00000131203 | IDO1              | indoleamine 2,3-dioxygenase 1                                              | 48.17855099 | 4.593009048 | 0.366435454 | 9.805298607 | 1.06831E-22 | 3.9825E-20  | Cluster 2 |
| ENSG00000137965 | IFI44             | interferon induced protein 44                                              | 777.1401967 | 3.872849012 | 0.297106838 | 9.66941397  | 4.067E-22   | 1.49618E-19 | Cluster 2 |
| ENSG00000250264 | XXbac-BPG246D15.9 |                                                                            | 251.6781398 | 2.572244665 | 0.162780351 | 9.658688259 | 4.51609E-22 | 1.63981E-19 | Cluster 2 |
| ENSG00000204264 | PSMB8             | proteasome subunit beta 8                                                  | 209.3800008 | 2.345540556 | 0.139572868 | 9.64041633  | 5.39686E-22 | 1.9345E-19  | Cluster 2 |
| ENSG00000138035 | PNPT1             | polyribonucleotide nucleotidyltransferase 1                                | 574.7822674 | 2.317153267 | 0.142076308 | 9.270745341 | 1.8485E-20  | 6.54204E-18 | Cluster 2 |
| ENSG00000141574 | SECTM1            | secreted and transmembrane 1                                               | 47.04872313 | 4.404762402 | 0.368929994 | 9.228749231 | 2.7381E-20  | 9.56933E-18 | Cluster 2 |

|                 |                    |                                                                      |             |             |             |             |             |             |           |
|-----------------|--------------------|----------------------------------------------------------------------|-------------|-------------|-------------|-------------|-------------|-------------|-----------|
| ENSG00000137628 | DDX60              | DEAD (Asp-Glu-Ala-Asp) box polypeptide 60                            | 311.1276007 | 2.75425497  | 0.192057799 | 9.133994991 | 6.60171E-20 | 2.27873E-17 | Cluster 2 |
| ENSG00000234745 | HLA-B              | major histocompatibility complex, class I, B                         | 781.498232  | 2.525667201 | 0.167148271 | 9.127627779 | 7.00166E-20 | 2.38731E-17 | Cluster 2 |
| ENSG00000130812 | ANGPTL6            | angiopoietin like 6                                                  | 96.75376562 | 3.047094947 | 0.224483281 | 9.119142155 | 7.57213E-20 | 2.55071E-17 | Cluster 2 |
| ENSG00000138670 | RASGEF1B           | RasGEF domain family member 1B                                       | 47.05669694 | 4.073050858 | 0.338668598 | 9.073917319 | 1.14813E-19 | 3.8215E-17  | Cluster 2 |
| ENSG00000197536 | CSorf56            |                                                                      | 111.5178767 | 2.914719703 | 0.215580241 | 8.881703131 | 6.58444E-19 | 2.16581E-16 | Cluster 2 |
| ENSG00000133106 | EPST1              | epithelial stromal interaction 1 (breast)                            | 437.8594816 | 4.277858726 | 0.370242765 | 8.853268813 | 8.49926E-19 | 2.76315E-16 | Cluster 2 |
| ENSG00000146859 | TMEM140            | transmembrane protein 140                                            | 194.14462   | 2.281589176 | 0.145152489 | 8.829260745 | 1.0537E-18  | 3.38625E-16 | Cluster 2 |
| ENSG00000137198 | GMPR               | guanosine monophosphate reductase                                    | 193.6646801 | 2.747127741 | 0.198471844 | 8.802899723 | 1.33326E-18 | 4.23448E-16 | Cluster 2 |
| ENSG00000059378 | PARP12             | poly(ADP-ribose) polymerase family member 12                         | 571.0561791 | 2.029355107 | 0.116949958 | 8.801671487 | 1.34793E-18 | 4.23448E-16 | Cluster 2 |
| ENSG00000173786 | CNP                | 2',3'-cyclic nucleotide 3' phosphodiesterase                         | 1024.102411 | 2.046738033 | 0.118997532 | 8.796300353 | 1.41401E-18 | 4.39269E-16 | Cluster 2 |
| ENSG00000132274 | TRIM22             | tripartite motif containing 22                                       | 1347.27451  | 2.253136445 | 0.143583168 | 8.727599902 | 2.60134E-18 | 7.9924E-16  | Cluster 2 |
| ENSG00000110446 | SLC15A3            | solute carrier family 15 (oligopeptide transporter), member 3        | 98.8390244  | 3.014941956 | 0.231402673 | 8.707513756 | 3.10613E-18 | 9.43958E-16 | Cluster 2 |
| ENSG00000125347 | IRF1               | interferon regulatory factor 1                                       | 344.1413453 | 2.69454559  | 0.200580364 | 8.448212755 | 2.95796E-17 | 8.89264E-15 | Cluster 2 |
| ENSG00000155287 | SLC25A28           | solute carrier family 25 (mitochondrial iron transporter), member 28 | 155.0327851 | 2.644007791 | 0.198433251 | 8.284941089 | 1.18168E-16 | 3.51473E-14 | Cluster 2 |
| ENSG00000055332 | EIF2AK2            | eukaryotic translation initiation factor 2 alpha kinase 2            | 954.9186499 | 2.223100046 | 0.147982213 | 8.265182807 | 1.39481E-16 | 4.10499E-14 | Cluster 2 |
| ENSG00000096696 | DSP                | desmoplakin                                                          | 70.84729299 | 3.045009658 | 0.248640374 | 8.224769067 | 1.95567E-16 | 5.69569E-14 | Cluster 2 |
| ENSG00000169248 | CXCL11             | chemokine (C-X-C motif) ligand 11                                    | 699.2194082 | 4.037573252 | 0.37005652  | 8.208403554 | 2.24149E-16 | 6.4608E-14  | Cluster 2 |
| ENSG00000172936 | MYD88              | myeloid differentiation primary response 88                          | 222.8247188 | 2.181225594 | 0.14538912  | 8.1245804   | 4.48913E-16 | 1.28073E-13 | Cluster 2 |
| ENSG00000266728 | AC015688.3         |                                                                      | 106.8314222 | 2.424856259 | 0.17665053  | 8.065960855 | 7.26621E-16 | 2.05208E-13 | Cluster 2 |
| ENSG00000126709 | IFI6               | interferon, alpha-inducible protein 6                                | 835.6537911 | 3.584598941 | 0.323937877 | 7.978687048 | 1.47898E-15 | 4.13508E-13 | Cluster 2 |
| ENSG00000140464 | PML                | promyelocytic leukemia                                               | 418.6767923 | 2.253665985 | 0.157546665 | 7.957426382 | 1.75655E-15 | 4.8625E-13  | Cluster 2 |
| ENSG00000225864 | HCG4P11            |                                                                      | 21.15026919 | 3.825829673 | 0.357738468 | 7.899149599 | 2.80813E-15 | 7.6973E-13  | Cluster 2 |
| ENSG00000234290 | AC116366.6         | uncharacterized LOC105379175                                         | 47.52537818 | 3.000835743 | 0.2550995   | 7.843354217 | 4.38668E-15 | 1.19075E-12 | Cluster 2 |
| ENSG00000163840 | DTX3L              | deltex 3 like, E3 ubiquitin ligase                                   | 587.8976362 | 2.92900973  | 0.248113086 | 7.774719839 | 7.56146E-15 | 2.0328E-12  | Cluster 2 |
| ENSG00000162654 | GBP4               | guanylate binding protein 4                                          | 1341.692457 | 3.572234676 | 0.335821999 | 7.659518083 | 1.86632E-14 | 4.96957E-12 | Cluster 2 |
| ENSG00000204525 | HLA-C              | major histocompatibility complex, class I, C                         | 772.0531872 | 2.126562673 | 0.14717166  | 7.654752795 | 1.93684E-14 | 5.1087E-12  | Cluster 2 |
| ENSG00000117226 | GBP3               | guanylate binding protein 3                                          | 159.3868754 | 2.386669082 | 0.181746364 | 7.629693662 | 2.35312E-14 | 6.14869E-12 | Cluster 2 |
| ENSG00000123609 | NMI                | N-myc and STAT interactor                                            | 137.4867522 | 2.418374682 | 0.187280237 | 7.573541681 | 3.63184E-14 | 9.4021E-12  | Cluster 2 |
| ENSG00000137959 | IFI44L             | interferon induced protein 44 like                                   | 1784.087937 | 3.830844821 | 0.375985313 | 7.529136712 | 5.10769E-14 | 1.31015E-11 | Cluster 2 |
| ENSG00000106785 | TRIM14             | tripartite motif containing 14                                       | 212.908226  | 2.017230819 | 0.13528196  | 7.519338269 | 5.50542E-14 | 1.39933E-11 | Cluster 2 |
| ENSG00000121858 | TNFSF10            | tumor necrosis factor superfamily member 10                          | 843.7576164 | 3.311906146 | 0.310295689 | 7.450655057 | 9.28779E-14 | 2.33944E-11 | Cluster 2 |
| ENSG00000166750 | SLFN5              | schlafen family member 5                                             | 671.1521348 | 2.170559995 | 0.157276877 | 7.442670628 | 9.86699E-14 | 2.46314E-11 | Cluster 2 |
| ENSG00000271503 | CCL5               | chemokine (C-C motif) ligand 5                                       | 24.53621412 | 3.785326909 | 0.374663266 | 7.434214023 | 1.05192E-13 | 2.6027E-11  | Cluster 2 |
| ENSG00000136826 | KLF4               | Kruppel-like factor 4 (gut)                                          | 178.2964331 | 2.73696114  | 0.235647396 | 7.371017765 | 1.6933E-13  | 4.11679E-11 | Cluster 1 |
| ENSG00000262112 | RP11-670E13.5      |                                                                      | 133.0556563 | 2.177270958 | 0.159697694 | 7.371871988 | 1.68249E-13 | 4.11679E-11 | Cluster 2 |
| ENSG00000271581 | XXbac-BPG248L24.12 |                                                                      | 230.4336802 | 2.504511005 | 0.208296074 | 7.22294461  | 5.08737E-13 | 1.22619E-10 | Cluster 2 |
| ENSG00000164342 | TLR3               | toll-like receptor 3                                                 | 99.52457431 | 3.51990219  | 0.350542009 | 7.18858832  | 6.54646E-13 | 1.56438E-10 | Cluster 2 |
| ENSG00000168404 | MLKL               | mixed lineage kinase domain-like                                     | 174.1473205 | 2.432793566 | 0.199902823 | 7.167450378 | 7.64073E-13 | 1.8104E-10  | #N/A      |
| ENSG00000204642 | HLA-F              | major histocompatibility complex, class I, F                         | 64.58755191 | 2.900491027 | 0.266764965 | 7.124215237 | 1.04675E-12 | 2.45934E-10 | Cluster 2 |
| ENSG00000185201 | IFITM2             | interferon induced transmembrane protein 2                           | 207.0203681 | 2.405574084 | 0.198629336 | 7.076367025 | 1.47983E-12 | 3.44787E-10 | Cluster 2 |
| ENSG00000279296 | RP11-609D21.3      |                                                                      | 137.8440574 | 3.313674417 | 0.327361341 | 7.067647061 | 1.57583E-12 | 3.6412E-10  | Cluster 2 |

|                 |               |                                                                                          |             |              |             |             |             |             |           |
|-----------------|---------------|------------------------------------------------------------------------------------------|-------------|--------------|-------------|-------------|-------------|-------------|-----------|
| ENSG00000117228 | GBP1          | guanylate binding protein 1, interferon-inducible                                        | 579.6687074 | 3.165621321  | 0.307513463 | 7.042362625 | 1.89007E-12 | 4.33152E-10 | Cluster 2 |
| ENSG0000010030  | ETV7          | ets variant 7                                                                            | 25.25225197 | 3.518013537  | 0.363937451 | 6.918808529 | 4.55458E-12 | 1.0353E-09  | Cluster 2 |
| ENSG00000132470 | ITGB4         | integrin beta 4                                                                          | 90.12607484 | 2.344864776  | 0.19470679  | 6.907128298 | 4.94563E-12 | 1.11512E-09 | Cluster 2 |
| ENSG00000239713 | APOBEC3G      | apolipoprotein B mRNA editing enzyme, catalytic polypeptide-like 3G                      | 46.97332891 | 3.143784858  | 0.311545237 | 6.881135069 | 5.93775E-12 | 1.32811E-09 | Cluster 2 |
| ENSG00000238025 | ZDHC4P1       |                                                                                          | 13.81069942 | 3.535067971  | 0.372157673 | 6.811811638 | 9.63772E-12 | 2.13858E-09 | Cluster 2 |
| ENSG00000105939 | ZC3HAV1       | zinc finger CCCH-type, antiviral 1                                                       | 697.5668898 | 2.096694901  | 0.161673402 | 6.783397173 | 1.17382E-11 | 2.58417E-09 | Cluster 2 |
| ENSG00000127528 | KLF2          | Kruppel-like factor 2                                                                    | 179.5183644 | 2.06037386   | 0.156483988 | 6.776245131 | 1.23339E-11 | 2.6941E-09  | Cluster 1 |
| ENSG00000141682 | PMAIP1        | phorbol-12-myristate-13-acetate-induced protein 1                                        | 259.8845716 | 2.893724219  | 0.279630112 | 6.772247118 | 1.26797E-11 | 2.74816E-09 | Cluster 2 |
| ENSG00000043143 | JADE2         | jade family PHD finger 2                                                                 | 259.4342307 | 2.02447789   | 0.152641363 | 6.711666298 | 1.92414E-11 | 4.13824E-09 | Cluster 2 |
| ENSG00000154451 | GBP5          | guanylate binding protein 5                                                              | 21.35526702 | 3.410503846  | 0.366888777 | 6.570121517 | 5.02742E-11 | 1.07299E-08 | Cluster 2 |
| ENSG00000185880 | TRIM69        | tripartite motif containing 69                                                           | 72.21305148 | 2.511009794  | 0.231060624 | 6.539451715 | 6.17448E-11 | 1.30782E-08 | Cluster 2 |
| ENSG00000196116 | TDRD7         | tudor domain containing 7                                                                | 175.0094745 | 2.206642675  | 0.18698409  | 6.453183651 | 1.09524E-10 | 2.3024E-08  | Cluster 2 |
| ENSG00000171388 | APLN          | apelin                                                                                   | 896.8443711 | -1.550046759 | 0.085803723 | 6.410523237 | 1.45021E-10 | 3.02585E-08 | #N/A      |
| ENSG00000160710 | ADAR          | adenosine deaminase, RNA-specific                                                        | 1726.799075 | 1.731164846  | 0.11744458  | 6.225615912 | 4.79668E-10 | 9.9341E-08  | Cluster 2 |
| ENSG00000184371 | CSF1          | colony stimulating factor 1 (macrophage)                                                 | 92.01746268 | 2.564798905  | 0.253052442 | 6.183694141 | 6.26186E-10 | 1.28732E-07 | #N/A      |
| ENSG00000110057 | UNC93B1       | unc-93 homolog B1 (C. elegans)                                                           | 140.832682  | 2.204782508  | 0.19598763  | 6.147237493 | 7.8844E-10  | 1.60905E-07 | Cluster 2 |
| ENSG00000142961 | MOB3C         | MOB kinase activator 3C                                                                  | 108.2317261 | 2.009437392  | 0.16450413  | 6.136243478 | 8.44956E-10 | 1.71189E-07 | Cluster 2 |
| ENSG00000137752 | CASP1         | caspase 1                                                                                | 44.39741738 | 2.669900423  | 0.279963783 | 5.964701606 | 2.45081E-09 | 4.92966E-07 | Cluster 2 |
| ENSG00000105559 | PLEKHA4       | pleckstrin homology domain containing A4                                                 | 71.82932436 | 2.49351368   | 0.25053388  | 5.961324195 | 2.50202E-09 | 4.99671E-07 | Cluster 2 |
| ENSG00000269720 | CTD-2521M24.5 |                                                                                          | 9.880737249 | 3.229671819  | 0.3779495   | 5.89939085  | 3.64846E-09 | 7.23456E-07 | Cluster 2 |
| ENSG00000155363 | MOV10         | Mov10 RISC complex RNA helicase                                                          | 385.1859822 | 1.808332536  | 0.139710636 | 5.785762352 | 7.21842E-09 | 1.42127E-06 | Cluster 2 |
| ENSG00000102921 | N4BP1         | NEDD4 binding protein 1                                                                  | 195.0511851 | 2.034134201  | 0.182226064 | 5.675007065 | 1.38683E-08 | 2.71149E-06 | Cluster 2 |
| ENSG00000136147 | PHF11         | PHD finger protein 11                                                                    | 103.3452573 | 1.919486265  | 0.163969919 | 5.607652142 | 2.0509E-08  | 3.98202E-06 | Cluster 2 |
| ENSG00000130775 | THEMIS2       | thymocyte selection associated family member 2                                           | 60.86618117 | 2.488719572  | 0.266334422 | 5.589662651 | 2.27511E-08 | 4.38689E-06 | Cluster 2 |
| ENSG00000173530 | TNFRSF10D     | tumor necrosis factor receptor superfamily member 10d, decoy with truncated death domain | 793.7748272 | -1.609384587 | 0.110193748 | 5.530119409 | 3.20013E-08 | 6.12825E-06 | Cluster 1 |
| ENSG00000133321 | RARRES3       | retinoic acid receptor responder (tazarotene induced) 3                                  | 15.1564096  | 3.013248888  | 0.365994423 | 5.500763843 | 3.78149E-08 | 7.1437E-06  | Cluster 2 |
| ENSG00000132622 | HSPA12B       | heat shock protein family A (Hsp70) member 12B                                           | 58.41989996 | 2.213463076  | 0.220580236 | 5.501232104 | 3.77146E-08 | 7.1437E-06  | Cluster 2 |
| ENSG00000141664 | ZCCHC2        | zinc finger, CCHC domain containing 2                                                    | 239.2721298 | 1.670971764  | 0.126766835 | 5.292959834 | 1.20352E-07 | 2.25834E-05 | #N/A      |
| ENSG00000163565 | IFI16         | interferon, gamma-inducible protein 16                                                   | 951.145506  | 1.716786308  | 0.136043872 | 5.268787914 | 1.37328E-07 | 2.55969E-05 | Cluster 2 |
| ENSG00000004468 | CD38          | CD38 molecule                                                                            | 25.14643705 | 2.949495351  | 0.376379914 | 5.179594543 | 2.22369E-07 | 4.11736E-05 | Cluster 2 |
| ENSG00000026950 | BTN3A1        | butyrophilin subfamily 3 member A1                                                       | 52.0139792  | 2.306454713  | 0.252783432 | 5.168276673 | 2.36262E-07 | 4.34583E-05 | #N/A      |
| ENSG00000169871 | TRIM56        | tripartite motif containing 56                                                           | 225.7994339 | 1.673925418  | 0.130695038 | 5.156472874 | 2.51645E-07 | 4.59852E-05 | Cluster 2 |
| ENSG00000137842 | TMEM62        | transmembrane protein 62                                                                 | 140.7285858 | 1.839427583  | 0.163621487 | 5.130301633 | 2.89278E-07 | 5.2519E-05  | Cluster 2 |
| ENSG00000196776 | CD47          | CD47 molecule                                                                            | 483.8831496 | 1.783372932  | 0.153984222 | 5.087358439 | 3.63085E-07 | 6.54935E-05 | Cluster 2 |
| ENSG00000132256 | TRIM5         | tripartite motif containing 5                                                            | 458.7526789 | 1.709864713  | 0.141738533 | 5.008269068 | 5.49217E-07 | 9.84331E-05 | #N/A      |
| ENSG00000225075 | RP11-426116.3 |                                                                                          | 41.56134499 | 2.257167674  | 0.251120757 | 5.006227636 | 5.55071E-07 | 9.88486E-05 | Cluster 2 |
| ENSG00000023445 | BIRC3         | baculoviral IAP repeat containing 3                                                      | 40.03472066 | 2.531406923  | 0.31097974  | 4.924458812 | 8.45941E-07 | 0.000149694 | #N/A      |
| ENSG00000198719 | DLL1          | delta-like 1 (Drosophila)                                                                | 71.73402048 | 2.091174907  | 0.222375953 | 4.906892543 | 9.25307E-07 | 0.000162709 | #N/A      |
| ENSG00000001629 | ANKIB1        | ankyrin repeat and IBR domain containing 1                                               | 315.2387528 | 1.602923343  | 0.124067457 | 4.859641344 | 1.17599E-06 | 0.000205496 | #N/A      |
| ENSG00000125826 | RBCK1         | RanBP-type and C3HC4-type zinc finger containing 1                                       | 324.2751346 | 1.681619243  | 0.142119663 | 4.79609387  | 1.61789E-06 | 0.000280961 | #N/A      |
| ENSG00000188290 | HES4          | hes family bHLH transcription factor 4                                                   | 163.6132349 | 1.880136242  | 0.184251769 | 4.776812986 | 1.78095E-06 | 0.000307368 | #N/A      |



|                 |                   |                                                                                  |             |             |             |             |             |             |           |
|-----------------|-------------------|----------------------------------------------------------------------------------|-------------|-------------|-------------|-------------|-------------|-------------|-----------|
| ENSG00000120690 | ELF1              | E74-like factor 1 (ets domain transcription factor)                              | 402.8167686 | 1.711015999 | 0.154843838 | 4.591826246 | 4.39384E-06 | 0.000753665 | #N/A      |
| ENSG00000225492 | GBP1P1            | guanylate binding protein 1, interferon-inducible pseudogene 1                   | 10.48246095 | 2.734645854 | 0.379000413 | 4.576897008 | 4.71924E-06 | 0.000804543 | Cluster 2 |
| ENSG00000185722 | ANKFY1            | ankyrin repeat and FYVE domain containing 1                                      | 383.6505267 | 1.569854762 | 0.12555744  | 4.538598143 | 5.66294E-06 | 0.000959577 | Cluster 2 |
| ENSG00000116514 | RNF19B            | ring finger protein 19B                                                          | 209.5293317 | 1.707470511 | 0.157429288 | 4.493893877 | 6.99325E-06 | 0.001177857 | #N/A      |
| ENSG00000116663 | FBXO6             | F-box protein 6                                                                  | 25.85490339 | 2.353544609 | 0.30523457  | 4.434440727 | 9.23116E-06 | 0.001540695 | #N/A      |
| ENSG00000216490 | IFI30             | interferon, gamma-inducible protein 30                                           | 19.5700805  | 2.667444566 | 0.3760739   | 4.433821566 | 9.25773E-06 | 0.001540695 | Cluster 2 |
| ENSG00000100226 | GTPBP1            | GTP binding protein 1                                                            | 569.5488583 | 1.589102902 | 0.133271921 | 4.420307732 | 9.85604E-06 | 0.001630563 | #N/A      |
| ENSG00000137727 | ARHGAP20          | Rho GTPase activating protein 20                                                 | 40.08260048 | 2.220291739 | 0.280835    | 4.345226698 | 1.39132E-05 | 0.002288229 | Cluster 2 |
| ENSG00000081479 | LRP2              | LDL receptor related protein 2                                                   | 6.154561465 | 2.630946444 | 0.376503798 | 4.331819361 | 1.47882E-05 | 0.002417918 | Cluster 2 |
| ENSG00000258521 | RP11-638I2.9      |                                                                                  | 12.81555778 | 2.52994973  | 0.353694497 | 4.325624915 | 1.521E-05   | 0.002472422 | Cluster 2 |
| ENSG00000137200 | CMTR1             | cap methyltransferase 1                                                          | 332.8999316 | 1.548790337 | 0.126932446 | 4.323483508 | 1.53585E-05 | 0.002482123 | Cluster 2 |
| ENSG00000112343 | TRIM38            | tripartite motif containing 38                                                   | 296.9064196 | 1.707879716 | 0.164763181 | 4.296346511 | 1.73636E-05 | 0.002790053 | Cluster 2 |
| ENSG00000174640 | SLCO2A1           | solute carrier organic anion transporter family member 2A1                       | 24.43114885 | 2.208370382 | 0.282160434 | 4.282564939 | 1.84751E-05 | 0.002951691 | Cluster 2 |
| ENSG00000165949 | IFI27             | interferon, alpha-inducible protein 27                                           | 519.7449245 | 2.277315305 | 0.30316389  | 4.213283137 | 2.51685E-05 | 0.00399822  | Cluster 2 |
| ENSG00000135148 | TRAFD1            | TRAF-type zinc finger domain containing 1                                        | 296.9174084 | 1.831258852 | 0.19889292  | 4.179429072 | 2.92242E-05 | 0.004616265 | Cluster 2 |
| ENSG00000079385 | CEACAM1           | carcinoembryonic antigen-related cell adhesion molecule 1 (biliary glycoprotein) | 26.00048596 | 2.414511483 | 0.341332497 | 4.14408677  | 3.41171E-05 | 0.005358869 | #N/A      |
| ENSG00000213928 | IRF9              | interferon regulatory factor 9                                                   | 148.5322803 | 1.802457415 | 0.193700868 | 4.142766235 | 3.43142E-05 | 0.005359719 | Cluster 2 |
| ENSG00000117475 | BLZF1             | basic leucine zipper nuclear factor 1                                            | 162.1984777 | 1.748579582 | 0.18080914  | 4.140164495 | 3.47057E-05 | 0.005390757 | #N/A      |
| ENSG00000244255 | XXbac-BPG116M5.17 |                                                                                  | 22.67599839 | 2.323968362 | 0.323345844 | 4.094589078 | 4.22918E-05 | 0.006532795 | Cluster 2 |
| ENSG00000124226 | RNF114            | ring finger protein 114                                                          | 340.9491206 | 1.717070694 | 0.175971897 | 4.07491597  | 4.6031E-05  | 0.007071317 | Cluster 2 |
| ENSG00000004799 | PDK4              | pyruvate dehydrogenase kinase, isozyme 4                                         | 119.7633771 | 2.070850828 | 0.264378484 | 4.050446214 | 5.11201E-05 | 0.007810195 | Cluster 2 |
| ENSG00000072121 | ZFYVE26           | zinc finger, FYVE domain containing 26                                           | 501.7855797 | 1.602879449 | 0.149202653 | 4.040675126 | 5.32975E-05 | 0.00809862  | #N/A      |
| ENSG00000243649 | CFB               | complement factor B                                                              | 23.99095462 | 2.279124695 | 0.317159223 | 4.033067944 | 5.50534E-05 | 0.008320198 | Cluster 2 |
| ENSG00000162645 | GBP2              | guanylate binding protein 2, interferon-inducible                                | 486.2106326 | 1.731982055 | 0.185544497 | 3.945048571 | 7.97838E-05 | 0.011992878 | #N/A      |
| ENSG00000196141 | SPATS2L           | spermatogenesis associated, serine rich 2 like                                   | 344.1209706 | 1.559745238 | 0.141938004 | 3.943589602 | 8.0271E-05  | 0.012001585 | #N/A      |
| ENSG00000277402 | MIR6891           | microRNA 6891                                                                    | 15.84701502 | 2.332245446 | 0.338922856 | 3.930822077 | 8.46559E-05 | 0.012589864 | Cluster 2 |
| ENSG00000005810 | MYCBP2            | MYC binding protein 2, E3 ubiquitin protein ligase                               | 1343.230927 | 1.591393027 | 0.150585031 | 3.927302887 | 8.59038E-05 | 0.01270785  | #N/A      |
| ENSG00000038210 | PI4K2B            | phosphatidylinositol 4-kinase type 2 beta                                        | 320.3848889 | 1.698160123 | 0.178298336 | 3.915685024 | 9.01479E-05 | 0.013265497 | Cluster 2 |
| ENSG00000134470 | IL15RA            | interleukin 15 receptor subunit alpha                                            | 171.4786886 | 1.845822163 | 0.217635185 | 3.886421959 | 0.000101733 | 0.014891843 | Cluster 2 |
| ENSG00000224611 | AC007919.18       |                                                                                  | 10.17385468 | 2.420187628 | 0.370544092 | 3.832708875 | 0.00012674  | 0.018455839 | Cluster 2 |
| ENSG00000258581 | RP11-638I2.10     |                                                                                  | 12.52613757 | 2.427907421 | 0.375165181 | 3.806076615 | 0.000141189 | 0.020453336 | #N/A      |
| ENSG00000144837 | PLA1A             | phospholipase A1 member A                                                        | 12.28602337 | 2.440711549 | 0.378791775 | 3.803439363 | 0.000142701 | 0.020565853 | #N/A      |
| ENSG00000277511 | CTD-2095E4.5      |                                                                                  | 9.434067971 | 2.400897752 | 0.369473677 | 3.791603679 | 0.000149678 | 0.021460703 | Cluster 2 |
| ENSG00000140105 | WARS              | tryptophanyl-tRNA synthetase                                                     | 2285.567922 | 2.142261146 | 0.307413887 | 3.71571095  | 0.000202633 | 0.028905202 | #N/A      |
| ENSG00000114127 | XRN1              | 5'-3' exoribonuclease 1                                                          | 783.9417977 | 1.917122937 | 0.2519542   | 3.640038292 | 0.000272597 | 0.038688089 | Cluster 2 |
| ENSG00000096968 | JAK2              | Janus kinase 2                                                                   | 269.597428  | 2.092478962 | 0.302963143 | 3.605979762 | 0.000310977 | 0.043912204 | #N/A      |
| ENSG00000102524 | TNFSF13B          | tumor necrosis factor superfamily member 13b                                     | 35.23610173 | 2.360508331 | 0.377815494 | 3.600986068 | 0.000317013 | 0.044539469 | #N/A      |

**Supplementary Table S3**

Two tables containing the HUVEC genes from Cluster 1 and 2 from the functional enrichment analysis that have been mapped to the Reactome Pathway database.

**HUVEC Cluster 1**

| Cluster   | ID            | Description                                                | GeneRatio | BgRatio   | pvalue      | p.adjust    | qvalue      | geneID                   | Count |
|-----------|---------------|------------------------------------------------------------|-----------|-----------|-------------|-------------|-------------|--------------------------|-------|
| Cluster 1 | R-HSA-9006936 | Signaling by TGF-beta family members                       | 5/45      | 102/10619 | 6.67311E-05 | 0.013234824 | 0.010745291 | 6498/4091/9241/4092/3726 | 5     |
| Cluster 1 | R-HSA-112409  | RAF-independent MAPK1/3 activation                         | 3/45      | 23/10619  | 0.000118698 | 0.013234824 | 0.010745291 | 1844/1843/1847           | 3     |
| Cluster 1 | R-HSA-201451  | Signaling by BMP                                           | 3/45      | 28/10619  | 0.000216338 | 0.016081155 | 0.013056213 | 4091/9241/4092           | 3     |
| Cluster 1 | R-HSA-5675221 | Negative regulation of MAPK pathway                        | 3/45      | 40/10619  | 0.000629679 | 0.035104632 | 0.028501282 | 1844/1843/1847           | 3     |
| Cluster 1 | R-HSA-2173793 | Transcriptional activity of SMAD2/SMAD3:SMAD4 heterotrimer | 3/45      | 44/10619  | 0.000834151 | 0.037203142 | 0.030205053 | 6498/4092/3726           | 3     |

HUVEC Cluster 2

| Cluster   | ID            | Description                                                                        | GeneRatio | BgRatio   | pvalue      | p.adjust    | qvalue      | geneID                                                                                                                                                                                                                                                                                                          | Count |
|-----------|---------------|------------------------------------------------------------------------------------|-----------|-----------|-------------|-------------|-------------|-----------------------------------------------------------------------------------------------------------------------------------------------------------------------------------------------------------------------------------------------------------------------------------------------------------------|-------|
| Cluster 2 | R-HSA-913531  | Interferon Signaling                                                               | 50/118    | 199/10619 | 1.3866E-56  | 5.07494E-54 | 3.70732E-54 | 9636/2537/2635/2633/1153<br>61/115362/103/91543/5610<br>/6772/6672/7318/51191/36<br>59/10475/3134/3133/3107/<br>3106/5696/23586/9830/105<br>81/8519/10410/3665/6737/<br>10346/9246/3433/3437/343<br>4/6773/4938/4940/4939/86<br>38/10379/3429/5371/3669/<br>54739/3430/7706/25939/68<br>4/10437/11274/4600/4599 | 50    |
| Cluster 2 | R-HSA-909733  | Interferon alpha/beta signaling                                                    | 33/118    | 69/10619  | 9.62277E-48 | 1.76097E-45 | 1.28641E-45 | 9636/2537/103/91543/6772<br>/3659/3134/3133/3107/310<br>6/5696/10581/8519/10410/<br>3665/3433/3437/3434/6773<br>/4938/4940/4939/8638/103<br>79/3429/3669/54739/3430/<br>25939/684/11274/4600/459<br>9                                                                                                           | 33    |
| Cluster 2 | R-HSA-877300  | Interferon gamma signaling                                                         | 24/118    | 92/10619  | 4.71974E-27 | 5.75808E-25 | 4.20637E-25 | 2635/2633/115361/115362/<br>6772/6672/3659/10475/313<br>4/3133/3107/3106/9830/36<br>65/6737/10346/4938/4940/<br>4939/8638/10379/5371/770<br>6/10437                                                                                                                                                             | 24    |
| Cluster 2 | R-HSA-1169410 | Antiviral mechanism by IFN-stimulated genes                                        | 16/118    | 80/10619  | 2.83628E-16 | 2.59519E-14 | 1.89583E-14 | 9636/5610/6772/7318/5119<br>1/23586/9246/3434/4938/4<br>940/4939/8638/7706/11274<br>/4600/4599                                                                                                                                                                                                                  | 16    |
| Cluster 2 | R-HSA-1169408 | ISG15 antiviral mechanism                                                          | 12/118    | 72/10619  | 1.76136E-11 | 1.28931E-09 | 9.41863E-10 | 9636/5610/6772/7318/5119<br>1/23586/9246/3434/7706/1<br>1274/4600/4599                                                                                                                                                                                                                                          | 12    |
| Cluster 2 | R-HSA-936440  | Negative regulators of DDX58/IFIH1 signaling                                       | 8/118     | 34/10619  | 2.61072E-09 | 1.59254E-07 | 1.16338E-07 | 9636/64135/7318/51191/23<br>586/9246/84166/7706                                                                                                                                                                                                                                                                 | 8     |
| Cluster 2 | R-HSA-983169  | Class I MHC mediated antigen processing & presentation                             | 20/118    | 371/10619 | 3.91588E-09 | 2.04745E-07 | 1.49569E-07 | 1520/4615/7318/151636/55<br>008/51191/3134/3133/3107<br>/3106/6891/5696/5698/689<br>0/6737/9246/140691/5699/<br>57674/55905                                                                                                                                                                                     | 20    |
| Cluster 2 | R-HSA-1236975 | Antigen processing-Cross presentation                                              | 11/118    | 99/10619  | 1.10296E-08 | 5.04606E-07 | 3.68622E-07 | 1520/4615/3134/3133/3107<br>/3106/6891/5696/5698/689<br>0/5699                                                                                                                                                                                                                                                  | 11    |
| Cluster 2 | R-HSA-168928  | DDX58/IFIH1-mediated induction of interferon-alpha/beta                            | 10/118    | 78/10619  | 1.30236E-08 | 5.29625E-07 | 3.86899E-07 | 9636/64135/7318/51191/23<br>586/3665/9246/84166/7913<br>2/7706                                                                                                                                                                                                                                                  | 10    |
| Cluster 2 | R-HSA-1236974 | ER-Phagosome pathway                                                               | 10/118    | 83/10619  | 2.40308E-08 | 8.79527E-07 | 6.42507E-07 | 4615/3134/3133/3107/3106<br>/6891/5696/5698/6890/569<br>9                                                                                                                                                                                                                                                       | 10    |
| Cluster 2 | R-HSA-1236977 | Endosomal/Vacuolar pathway                                                         | 5/118     | 11/10619  | 6.81633E-08 | 2.26798E-06 | 1.65679E-06 | 1520/3134/3133/3107/3106<br>3134/3133/3107/3106/6891<br>/6890                                                                                                                                                                                                                                                   | 5     |
| Cluster 2 | R-HSA-983170  | Antigen Presentation: Folding, assembly and peptide loading of class I MHC         | 6/118     | 25/10619  | 2.46963E-07 | 7.53238E-06 | 5.50252E-06 | 3428/4615/11277/7098/818<br>44/3665/6737                                                                                                                                                                                                                                                                        | 6     |
| Cluster 2 | R-HSA-1834949 | Cytosolic sensors of pathogen-associated DNA                                       | 7/118     | 63/10619  | 5.78686E-06 | 0.000162922 | 0.000119017 | 64135/23586/3665/7706<br>7318/151636/55008/51191/<br>5696/5698/6737/9246/1406<br>91/5699/57674/55905                                                                                                                                                                                                            | 7     |
| Cluster 2 | R-HSA-918233  | TRAF3-dependent IRF activation pathway                                             | 4/118     | 14/10619  | 1.33089E-05 | 0.000347933 | 0.00025417  | 64135/23586/3665/7706<br>7318/151636/55008/51191/<br>5696/5698/6737/9246/1406<br>91/5699/57674/55905                                                                                                                                                                                                            | 4     |
| Cluster 2 | R-HSA-983168  | Antigen processing: Ubiquitination & Proteasome degradation                        | 12/118    | 309/10619 | 0.000160979 | 0.003927889 | 0.002869381 | 64135/23586/3665/7706<br>7318/151636/55008/51191/<br>5696/5698/6737/9246/1406<br>91/5699/57674/55905                                                                                                                                                                                                            | 12    |
| Cluster 2 | R-HSA-933543  | NF-kB activation through FADD/RIP-1 pathway mediated by caspase-8 and -10          | 3/118     | 12/10619  | 0.000273524 | 0.005977088 | 0.004366351 | 64135/23586/7706                                                                                                                                                                                                                                                                                                | 3     |
| Cluster 2 | R-HSA-933541  | TRAF6 mediated IRF7 activation                                                     | 4/118     | 29/10619  | 0.000277624 | 0.005977088 | 0.004366351 | 64135/23586/3665/7706                                                                                                                                                                                                                                                                                           | 4     |
| Cluster 2 | R-HSA-1679131 | Trafficking and processing of endosomal TLR                                        | 3/118     | 13/10619  | 0.000352705 | 0.006964535 | 0.005087696 | 1520/7098/81622                                                                                                                                                                                                                                                                                                 | 3     |
| Cluster 2 | R-HSA-196807  | Nicotinate metabolism                                                              | 4/118     | 31/10619  | 0.000361547 | 0.006964535 | 0.005087696 | 83666/54625/952/84875                                                                                                                                                                                                                                                                                           | 4     |
| Cluster 2 | R-HSA-5656169 | Termination of translesion DNA synthesis                                           | 4/118     | 32/10619  | 0.000409675 | 0.007497044 | 0.005476702 | 9636/7318/9246/7706                                                                                                                                                                                                                                                                                             | 4     |
| Cluster 2 | R-HSA-3134975 | Regulation of innate immune responses to cytosolic DNA                             | 3/118     | 15/10619  | 0.000552086 | 0.009622063 | 0.007029059 | 11277/81844/6737                                                                                                                                                                                                                                                                                                | 3     |
| Cluster 2 | R-HSA-1834941 | STING mediated induction of host immune responses                                  | 3/118     | 16/10619  | 0.000674001 | 0.011212926 | 0.008191208 | 3428/11277/6737                                                                                                                                                                                                                                                                                                 | 3     |
| Cluster 2 | R-HSA-109581  | Apoptosis                                                                          | 8/118     | 176/10619 | 0.000754714 | 0.012009791 | 0.00877333  | 8837/8743/1832/5696/5698<br>/840/5699/5366                                                                                                                                                                                                                                                                      | 8     |
| Cluster 2 | R-HSA-5357801 | Programmed Cell Death                                                              | 8/118     | 179/10619 | 0.000842832 | 0.012853185 | 0.009389442 | 8837/8743/1832/5696/5698<br>/840/5699/5366                                                                                                                                                                                                                                                                      | 8     |
| Cluster 2 | R-HSA-110313  | Translesion synthesis by Y family DNA polymerases bypasses lesions on DNA template | 4/118     | 39/10619  | 0.000882611 | 0.012921431 | 0.009439297 | 9636/7318/9246/7706                                                                                                                                                                                                                                                                                             | 4     |
| Cluster 2 | R-HSA-197264  | Nicotinamide salvaging                                                             | 3/118     | 19/10619  | 0.001138254 | 0.016023117 | 0.011705124 | 83666/54625/84875                                                                                                                                                                                                                                                                                               | 3     |
| Cluster 2 | R-HSA-451927  | Interleukin-2 family signaling                                                     | 4/118     | 44/10619  | 0.001395859 | 0.018921639 | 0.013822537 | 6772/3600/3601/3965                                                                                                                                                                                                                                                                                             | 4     |
| Cluster 2 | R-HSA-73893   | DNA Damage Bypass                                                                  | 4/118     | 49/10619  | 0.002087756 | 0.026957844 | 0.019693104 | 9636/7318/9246/7706                                                                                                                                                                                                                                                                                             | 4     |
| Cluster 2 | R-HSA-5260271 | Diseases of Immune System                                                          | 3/118     | 24/10619  | 0.002283315 | 0.026957844 | 0.019693104 | 4615/7098/81622                                                                                                                                                                                                                                                                                                 | 3     |
| Cluster 2 | R-HSA-5602358 | Diseases associated with the TLR signaling cascade                                 | 3/118     | 24/10619  | 0.002283315 | 0.026957844 | 0.019693104 | 4615/7098/81622                                                                                                                                                                                                                                                                                                 | 3     |
| Cluster 2 | R-HSA-933542  | TRAF6 mediated NF-kB activation                                                    | 3/118     | 24/10619  | 0.002283315 | 0.026957844 | 0.019693104 | 64135/23586/7706                                                                                                                                                                                                                                                                                                | 3     |
| Cluster 2 | R-HSA-912694  | Regulation of IFNA signaling                                                       | 3/118     | 26/10619  | 0.002886136 | 0.033010181 | 0.024114426 | 6772/6773/11274                                                                                                                                                                                                                                                                                                 | 3     |
| Cluster 2 | R-HSA-180585  | Vif-mediated degradation of APOBEC3G                                               | 4/118     | 54/10619  | 0.00298648  | 0.033122783 | 0.024196684 | 5696/5698/5699/60489                                                                                                                                                                                                                                                                                            | 4     |

**Supplementary Table S4:** List of primers used for qPCR (Supplementary Fig. S6).

| <b>Name</b>   | <b>Sequence</b>        | <b>Used for</b> |
|---------------|------------------------|-----------------|
| agrC_qPCR_F   | CATTCGCGTTGCATTTATTG   | ATCC29213       |
| agrC_qPCR_R   | CCTAAACCACGACCTTCACC   | ATCC29213       |
| hlgA_qPCR_F   | GAGGCAGTGGCTCATTCAAC   | ATCC29213       |
| hlgA_qPCR_R   | CTTGACCATTTCGGTGTAACG  | ATCC29213       |
| isdB_qPCR_F   | GGACAATACCATGTGAGAATCG | ATCC29213       |
| isdb_qPCR_R   | ATGGTGTTGGTTTGCTAGGC   | ATCC29213       |
| srtB_qPCR_F   | AGCGAGAACATCGACGTAAAG  | ATCC29213       |
| srtB_qPCR_R   | CATCGTATTATCACCGACATGG | ATCC29213       |
| gyrB_fwd3     | GAAGCATTAGCTGGTTATGCAA | Ref ATCC29213   |
| gyrB_rev3     | CCACGTCCGTTATCCGTTAC   | Ref ATCC29213   |
| JUNB_qPCR_F   | CACCTCCCGTTTACACCAAC   | HUVEC           |
| JUNB_qPCR_R   | GGAGGTAGCTGATGGTGGTC   | HUVEC           |
| SMAD6_qPCR_F  | ACCAACTCCCTCATCACTGC   | HUVEC           |
| SMAD6_qPCR_R  | TGGTCGTACACCGCATAGAG   | HUVEC           |
| HLA-B_qPCR_F  | ACACCCAGTTCGTGAGGTTC   | HUVEC           |
| HLA-B_qPCR_R  | GTGTGTTCCGGTCCAATAC    | HUVEC           |
| PSMB10_qPCR_F | CACTGAGCTCACCCACAGAG   | HUVEC           |
| PSMB10_qPCR_R | TCCAGGGTTAGTGGCTTCAC   | HUVEC           |
| B2M_qPCR_F    | TCTCTCTTCTGGCCTGGAG    | Ref HUVEC       |
| B2M_qPCR_R    | AATGTCGGATGGATGAAACC   | Ref HUVEC       |

## Supplementary Information References

1. Scheutz, F. VirulenceFinder 2.0. <https://cge.cbs.dtu.dk/services/VirulenceFinder/> (2019).
2. Jenul, C. & Horswill, A. R. Regulation of Staphylococcus aureus virulence. *Microbiol Spectr.* **6**(1), GPP3-0031-2018 (2019).
3. Laarman, A. J. *et al.* Staphylococcus aureus metalloprotease aureolysin cleaves complement C3 to mediate immune evasion. *J Immunol.* **186**(11):6445-53 (2011).
4. Thammavongsa, V., Kim, H. K., Missiakas, D., Schneewind, O. Staphylococcal manipulation of host immune responses. *Nat Rev Microbiol.* **13**(9):529-43 (2015).
5. Skaar, E. P., Humayun, M., Bae, T., DeBord, K. L., Schneewind, O. Iron-source preference of Staphylococcus aureus infections. *Science.* **305**(5690):1626-8 (2004).
6. Marr, J. C. *et al.* Characterization of novel type C staphylococcal enterotoxins: biological and evolutionary implications. *Infect Immun.* **61**(10):4254-62 (1993).
7. Clarke, S. R., Wiltshire, M. D. & Foster, S. J. IsdA of Staphylococcus aureus is a broad spectrum, iron-regulated adhesin. *Mol Microbiol.* **51**(5):1509-19 (2004).
8. Bradshaw, W. J. *et al.* Molecular features of the sortase enzyme family. *FEBS J.* **282**(11), 2097-2114 (2015).
